# Supplementary material for: Distribution, organization and expression of genes concerned with anaerobic lactate utilization in human intestinal bacteria
Source: PubMed Central journal article supplement (PMC8914356; doi:10.1099/mgen.0.000739), 2022-01-25

**Figure S1.** Illustrative schematic figure showing the transcriptomic experimental workflow

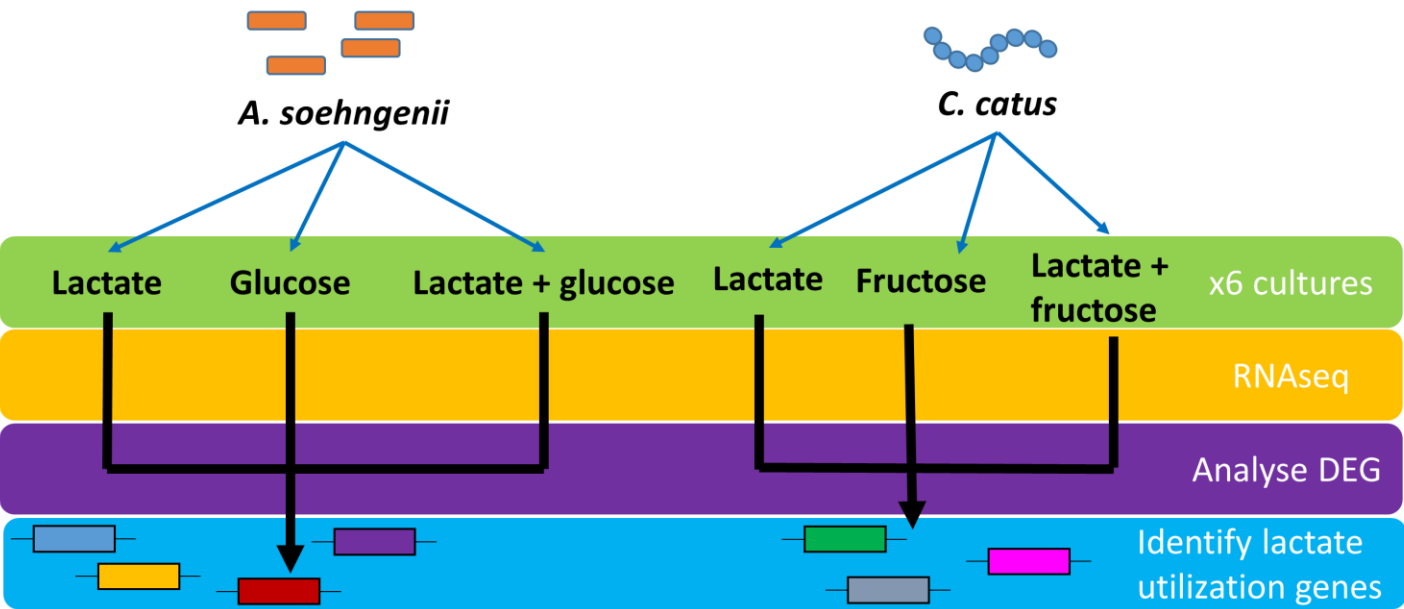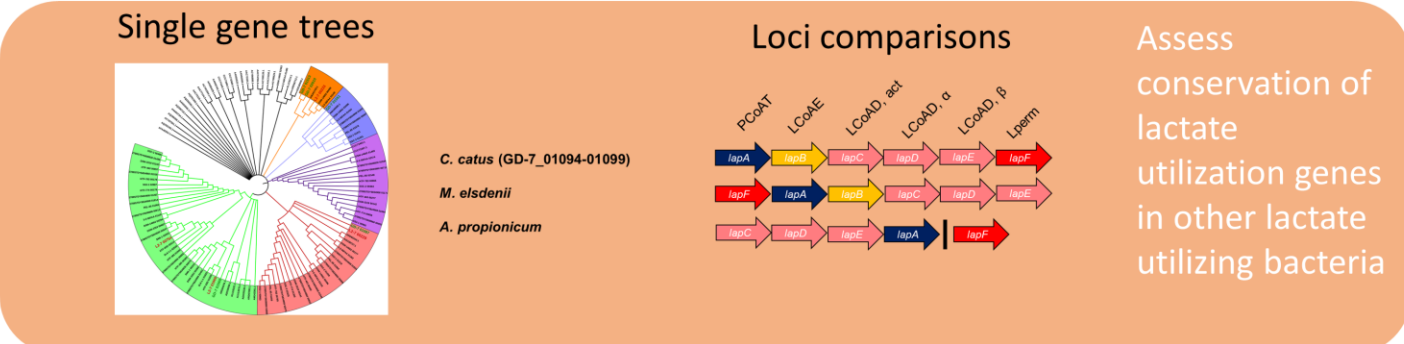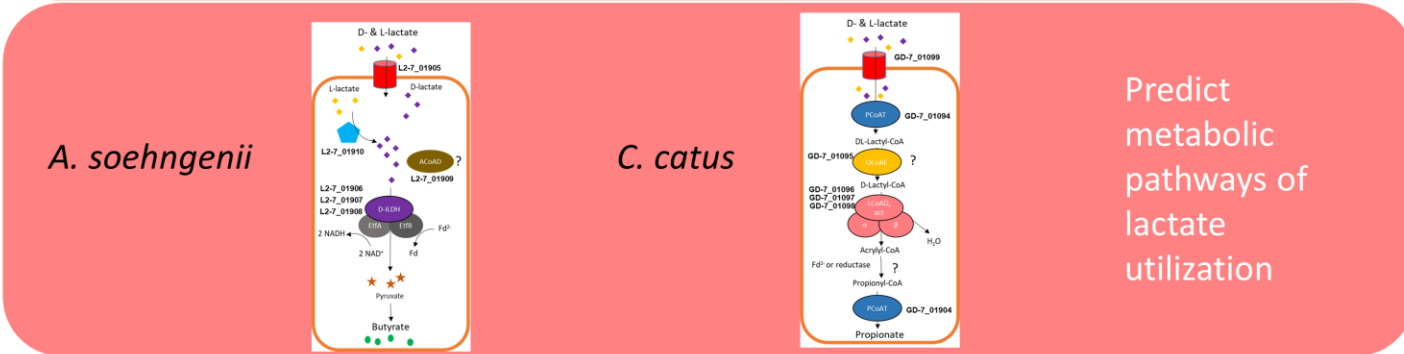

Supplement: mgen-8-0739-s001.pdf [file mgen-8-0739-s001.pdf]
