# Supplementary material for: Distribution, organization and expression of genes concerned with anaerobic lactate utilization in human intestinal bacteria
Source: Microb Genom. 2022 Jan 25;8(1):000739. doi: 10.1099/mgen.0.000739 (PMC8914356; doi:10.1099/mgen.0.000739)
Supplement: Supplementary material 2 [file mgen-8-0739-s002.xlsx]

## Sheet: Contents
Table S1	Classifying new Anaerobutyricum genomes by average nucleotide identity and average amino acid identity
Table S2	Genome information of strains included in this study
Table S3	Short chain fatty acid profiles following growth of lactate-utilizing bacteria on different carbon sources
Table S4	Data for glucose and fructose concentrations present in Anaerobutyricum soehngenii and Coprococcus catus culture supernatants taken at OD650 0.3
Table S5	Overview showing number of differentially expressed genes during the transcriptomics experiments in each growth condition
Table S6	Differentially expressed genes in Anaerobutyricum soehngenii L2-7 during growth on glucose versus lactate
Table S7	Differentially expressed genes in Anaerobutyricum soehngenii L2-7 during growth on glucose versus glucose and lactate
Table S8	Differentially expressed genes in Anaerobutyricum soehngenii L2-7 during growth on lactate versus glucose and lactate
Table S9	Differentially expressed genes in Coprococcus catus GD/7 during growth on fructose versus lactate
Table S10	Differentially expressed genes in Coprococcus catus GD/7 during growth on fructose versus fructose and lactate
Table S11	Differentially expressed genes in Coprococcus catus GD/7 during growth on lactate versus fructose and lactate
Table S12	Lactate utilization HMM (full sequence bit score >=80) in Coprococcus catus GD/7 and Anaerobutyricum soehngenii L2-7
Table S13	Comparison of Anaerobutyricum soehngenii L2-7 lactate utilization locus to that of other known lactate utilizers
Table S14	Comparison of Coprococcus catus GD/7 lactate utilization locus to that of other known lactate utilizers
Table S15	Comparison of Coprococcus catus GD/7 butyrate production loci to that of other known lactate utilizers
Table S16	Representative genes present in each lactate permease protein family
Table S17	Representative genes present in each sub-family of LP-IV
Table S18	Abundance of acyl-CoA dehydrogenase families 1-5 in known lactate utilizers

## Sheet: Table S1. Classifying genomes
Average nucleotide identity
	L2-7	SL6/1/1	HTF-83D	DSM3353	2789STDY5834966	SM6/1	HTF-385	2789STDY5834835
Anaerobutyricum soehngenii L2-7	100	96.4652	96.3356	88.988	88.8256	89.3317	89.2825	89.0661
Anaerobutyricum soehngenii SL6/1/1	96.4302	100	97.6156	89.9018	89.9818	90.0448	89.9923	89.6545
Anaerobutyricum soehngenii HTF-83D	96.306	97.6654	100	89.918	90.2269	90.3078	90.087	89.897
Anaerobutyricum hallii DSM3353	88.9873	89.8655	89.8491	100	98.0718	98.2429	97.7142	97.5225
Anaerobutyricum hallii 2789STDY5834966	88.8586	89.9437	90.1328	97.9923	100	98.2858	98.0638	97.8188
Anaerobutyricum hallii SM6/1	89.292	90.1018	90.3319	98.1602	98.256	100	98.0212	97.888
Anaerobutyricum hallii HTF-385	89.2621	89.9386	90.0605	97.7593	98.033	98.1145	100	99.0346
Anaerobutyricum hallii 2789STDY5834835	89.0635	89.6583	89.8704	97.4711	97.8308	97.8813	99.1414	100
Average amino acid identity
	L2-7	SL6/1/1	HTF-83D	DSM3353	2789STDY5834966	SM6/1	HTF-385	2789STDY5834835
Anaerobutyricum soehngenii L2-7	100	97.32	97.7	89.81	89.87	89.09	89.38	89.53
Anaerobutyricum soehngenii SL6/1/1	97.32	100	98.42	90.14	90.15	90.01	90.15	90.13
Anaerobutyricum soehngenii HTF-83D	97.7	98.42	100	90.16	90.72	90.15	89.94	90.08
Anaerobutyricum hallii DSM3353	89.81	90.14	90.16	100	98.65	98.69	98.4	98.58
Anaerobutyricum hallii 2789STDY5834966	89.87	90.15	90.72	98.65	100	98.54	98.36	98.67
Anaerobutyricum hallii SM6/1	89.09	90.01	90.15	98.69	98.54	100	98.24	98.16
Anaerobutyricum hallii HTF-385	89.38	90.15	89.94	98.4	98.36	98.24	100	99
Anaerobutyricum hallii 2789STDY5834835	89.53	90.13	90.08	98.58	98.67	98.16	99	100

## Sheet: Table S2. Genomes
Species	strain	Genbank Accession	CDS number	CheckM Completeness (%)	CheckM Contamination (%)	Genome Reference (PMID)	Reference genome for transcriptomics
New LUBs
Anaerostipes hadrus	HTF-463	JAFIQL000000000	2696	99.33	2.01	This study
Anaerostipes hadrus	HTF-774	JAFIQM000000000	2809	99.33	1.34	This study
Anaerostipes hadrus	HTF-783	JAFIQN000000000	2822	98.66	1.34	This study
Anaerobutyricum soehngenii	HTF-83D	JAFIQO000000000	2809	100	1.34	This study
Anaerobutyricum soehngenii	SL6/1/1	JAFIQP000000000	2900	99.31	1.7	This study
Anaerobutyricum hallii	SM6/1	JAFIQQ000000000	3202	99.33	1.05	This study
Anaerobutyricum hallii	HTF-385	JAFIQR000000000	3488	99.33	0.67	This study
Previously existing LUBs
Acetobacterium woodii	DSM1030	GCA_000247605	3473	97.4	1.06	22479398
Anaerostipes caccae	3-2-56FAA	GCA_000185825	3392	96.09	4.03	Unpublished
Anaerostipes caccae	DSM14662	GCA_000154305	3460	99.33	3.36	Unpublished
Anaerostipes sp.	2789STDY5608830	GCA_001404655	2334	99.33	2.01	27144353
Anaerostipes hadrus	2789STDY5608868	GCA_001405715	3222	99.33	2.01	27144353
Anaerostipes hadrus	2789STDY5834860	GCA_001404955	2782	99.33	2.01	27144353
Anaerostipes hadrus	2789STDY5834908	GCA_001404835	3445	99.33	3.38	27144353
Anaerostipes hadrus	2789STDY5834959	GCA_001405635	3010	98.66	2.68	27144353
Anaerostipes hadrus	DSM3319	GCA_000332875	2663	99.33	2.01	Unpublished
Anaerostipes hadrus	PEL-85	GCA_000876135	3502	98.99	3.38	25838483
Anaerostipes hadrus	SS2/1	GCA_000154545	3022	99.33	1.34	Unpublished
Anaerostipes hadrus	SSC/2	GCA_000210695	3170	99.33	3.49	Unpublished
Anaerotignum propionicum	DSM1682	GCA_001561955	2926	95.97	0	27081148
Bacillus subtilis	NCIB3610	GCA_002055965	4335	99.56	0.35	Unpublished
Campylobacter jejuni	NCTC11168	GCA_900475265	1624	99.57	0.15	Unpublished
Coprococcus catus	GD/7	GCA_000210555	3261	99.05	1.34	Unpublished	Yes
Coprococcus catus	MCC394	GCF_018785195	3301	99.33	1.34	33993839
Coprococcus catus	MCC395	GCF_018785175	3296	99.33	1.34	33993839
Coprococcus catus	AM28-39	GCF_003434235	3161	99.33	1.34	Unpublished
Coprococcus catus	MGYG-HGUT-01714	GCF_902381825	3259	99.05	1.34	Unpublished
Coprococcus catus	AF45-17	GCF_003433855	3672	95.97	1.34	Unpublished
Escherichia coli	K-12	GCA_000005845	4140	99.83	0.04	9278503
Anaerobutyricum soehngenii	L2-7	GCA_900209925	3005	100	1.34	29074659	Yes
Anaerobutyricum hallii	2789STDY5834835	GCA_001405175	3200	99.33	0.83	27144353
Anaerobutyricum hallii	2789STDY5834966	GCA_001406155	2889	99.33	0.67	27144353
Anaerobutyricum hallii	DSM3353	GCA_900209925	2829	99.33	1.34	Unpublished
Eubacterium limosum	ATCC8486	GCA_000807675	4029	98.94	0	25676768
Eubacterium limosum	KIST612	GCA_000152245	4579	98.94	0	21036996
Eubacterium limosum	SA11	GCA_001481725	3805	99.3	0	26981167
Megasphaera elsdenii	DSM20460	GCA_000283495	2220	100	0	21914887
Salmonella Typhimurium	14028S	GCA_000022165	5413	99.67	0.04	19897643
Shewanella oneidensis	MR-1	GCA_000146165	4196	99.84	0.04	19196979
Veillonella parvula	DSM2008	GCA_000024945	1844	100	0	Unpublished
Previously existing non-LUBs
Eubacterium rectale	A1-86	GCA_000209935	2898	99	1.21	Unpublished
Roseburia intestinalis	L1-82	GCA_900537995	4067	99.03	1.57	Unpublished
Roseburia hominis	A2-183	GCA_000225345	3362	99.52	0.24	26543119
Coprococcus sp.	L2-50	GCA_000154245	2949	99.33	0.67	Unpublished
Faecalibacterium prausnitzii	A2-165	GCA_000162015	2913	100	0	Unpublished

## Sheet: Table S3. SCFA profiles
SCFA
Lactate 35mM	Net production (mM)					Glucose 11mM (Fructose 11 mM for C. catus)	Net production (mM)							Lactate 35mM + Glucose 11mM (Fructose 11 mM for C. catus)	Net production (mM)
	Acetate	Propionate	Butyrate	Lactate			Formate	Acetate	Butyrate	Lactate	Fumarate	Remaining sugar			Formate	Acetate	Propionate	Butyrate	Lactate	Fumarate	Remaining sugar
Anaerobutyricum soehngenii SL6/1/1	-13.8983	0	24.9283	-37.935		Anaerobutyricum soehngenii SL6/1/1	0	4.36167	3.76167	0	0	0		Anaerobutyricum soehngenii SL6/1/1	0	3.735	0	3.48833	-5.25167	0	6
Anaerobutyricum soehngenii L2-7	-12.0117	0	25.6383	-37.9683		Anaerobutyricum soehngenii L2-7	0	0	7.83833	0	0	0		Anaerobutyricum soehngenii L2-7	0	4.12167	0	5.23833	-5.355	0	2
Anaerobutyricum soehngenii HTF-83D	-16.6154	0	27.716	-35.8964		Anaerobutyricum soehngenii HTF-83D	0	3.46439	13.4607	8.39473	0	0		Anaerobutyricum soehngenii HTF-83D	0	-10.1651	0	23.8201	-22.0078	0	0
Anaerobutyricum hallii SM6/1	-11.815	0	28.0817	-37.805		Anaerobutyricum hallii SM6/1	0	0	6.86833	0	0	0		Anaerobutyricum hallii SM6/1	0	-3.22167	0	16.845	-15.695	0	0
Anaerobutyricum hallii DSM3353	-15.709	0	23.4067	-30.2152		Anaerobutyricum hallii DSM3353	0	-3.27667	7.14	0	0	0		Anaerobutyricum hallii DSM3353	3.77833	-15.5816	0	21.6367	-27.2052	0	0
Coprococcus catus GD/7	6.63833	16.97	6.64167	-38.195		Coprococcus catus GD/7	0	-5.64167	13.9217	0	0	0		Coprococcus catus GD/7	0	6.515	23.42	10.4683	-31.595	0	0
Anaerostipes hadrus SSC/2	-3.975	0	13.9883	-14.5183		Anaerostipes hadrus SSC/2	0	0	11.9383	0	0	0		Anaerostipes hadrus SSC/2	0	-14.115	0	26.3617	-21.525	0	0
Anaerostipes hadrus SS2/1	-9.565	0	13.5117	-21.0783		Anaerostipes hadrus SS2/1	0	12.8317	3.09167	5.28333	0	0		Anaerostipes hadrus SS2/1	0	4.115	0	17.4683	-12.2683	0	0
Anaerostipes hadrus HTF-920	-10.8857	0	13.4967	-23.0919		Anaerostipes hadrus HTF-920	0	-4.19667	8.95333	0	0	0		Anaerostipes hadrus HTF-920	5.265	-16.2216	0	22.3133	-19.9018	5.47667	0
Anaerostipes caccae DSM14662	-17.2183	0	27.8383	-34.0317		Anaerostipes caccae DSM14662	0	0	12.935	0	0	0		Anaerostipes caccae DSM14662	0	-13.0217	0	26.195	-19.7417	0	0
SCFA - SEM
Lactate 35mM	Net production (mM)					Glucose 11mM (Fructose 11 mM for C. catus)	Net production (mM)							Lactate 35mM + Glucose 11mM (Fructose 11 mM for C. catus)	Net production (mM)
	Acetate	Propionate	Butyrate	Lactate			Formate	Acetate	Butyrate	Lactate	Fumarate	sugar			Formate	Acetate	Propionate	Butyrate	Lactate	Fumarate	sugar
Anaerobutyricum soehngenii SL6/1/1	1.72416	0.666141	2.69385	0.134536		Anaerobutyricum soehngenii SL6/1/1	0	0.510327	0.233975	0	0	0		Anaerobutyricum soehngenii SL6/1/1	0.130128	0.606712	0	0.949427	0.724623	0	3.21455
Anaerobutyricum soehngenii L2-7	0.874954	0.40501	1.27213	0.115662		Anaerobutyricum soehngenii L2-7	0	0.824864	2.21725	0	0	0		Anaerobutyricum soehngenii L2-7	0.072111	2.43995	0	1.21768	2.59081	0	2
Anaerobutyricum soehngenii HTF-83D	0.635772	0.339337	2.04525	0.130147		Anaerobutyricum soehngenii HTF-83D	0	2.31385	2.68329	7.83218	0	0		Anaerobutyricum soehngenii HTF-83D	0.0375795	2.50638	0	3.61966	6.10393	0	0
Anaerobutyricum hallii SM6/1	0.445758	0.212211	0.733901	0.02		Anaerobutyricum hallii SM6/1	0	1.13132	3.05672	0	0	0		Anaerobutyricum hallii SM6/1	0.303553	4.33793	0	5.31904	7.46408	0	0
Anaerobutyricum hallii DSM3353	0.958216	0.0735603	2.54425	1.78814		Anaerobutyricum hallii DSM3353	0	3.99156	0.730365	0	0	0		Anaerobutyricum hallii DSM3353	0.440845	0.786857	0	6.08638	3.8668	0	0
Coprococcus catus GD/7	1.40169	1.21385	0.665891	0		Coprococcus catus GD/7	0	1.0034	0.610091	0	0	0		Coprococcus catus GD/7	0.0296273	1.32937	0.172434	0.268411	1.32917	0	0
Anaerostipes hadrus SSC/2	1.34056	0.506272	2.12655	1.94283		Anaerostipes hadrus SSC/2	0	1.57677	0.214269	0	0.0173205	0		Anaerostipes hadrus SSC/2	0.268225	1.53795	0	2.10685	1.5025	0.0152753	0
Anaerostipes hadrus SS2/1	1.69319	0.922189	2.51578	1.28188		Anaerostipes hadrus SS2/1	0	0.978133	0.286725	0.296891	0	0		Anaerostipes hadrus SS2/1	0.196044	2.61931	0	0.896741	2.17794	0	0
Anaerostipes hadrus HTF-920	2.24337	0.182483	1.95428	1.61314		Anaerostipes hadrus HTF-920	0	1.13185	0.373155	0	1.4	0		Anaerostipes hadrus HTF-920	0.350761	0.407035	0	1.49043	0.996533	0.376755	0
Anaerostipes caccae DSM14662	0.942715	0.440341	0.814071	0.910354		Anaerostipes caccae DSM14662	0	1.00381	0.410731	0	0	0		Anaerostipes caccae DSM14662	0.129915	3.70925	0	6.12884	7.33863	0.00333333	0
OD650 -24h of incubation
	G/F	L	LG/F
Anaerobutyricum soehngenii SL6/1/1	0.536667	0.423333	0.346667		G = Glucose
Anaerobutyricum soehngenii L2-7	0.416667	0.486667	0.45		F = Fructose
Anaerobutyricum soehngenii HTF-83D	0.793333	0.436667	0.71		L = Lactate
Anaerobutyricum hallii SM6/1	0.203333	0.353333	0.553333		LG/F = Lactate plus Glucose/Fructose
Anaerobutyricum hallii DSM3353	0.833333	0.453333	0.77
Coprococcus catus GD/7	0.733333	0.526667	0.913333
Anaerostipes hadrus SSC/2	1.02333	0.29	0.92
Anaerostipes hadrus SS2/1	0.706667	0.296667	0.886667
Anaerostipes hadrus HTF-920	0.773333	0.263333	0.72
Anaerostipes caccae DSM14662	0.71	0.453333	0.52
OD650 -SEM
	G/F	L	LG/F
Anaerobutyricum soehngenii SL6/1/1	0.0643774	0.0176383	0.0742369
Anaerobutyricum soehngenii L2-7	0.0517472	0.0133333	0.0960902
Anaerobutyricum soehngenii HTF-83D	0.0120185	0.0260342	0.0416333
Anaerobutyricum hallii SM6/1	0.098714	0.00333333	0.0437163
Anaerobutyricum hallii DSM3353	0.034801	0.0338296	0.111355
Coprococcus catus GD/7	0.00666667	0.031798	0.0466667
Anaerostipes hadrus SSC/2	0.031798	0.043589	0.0360555
Anaerostipes hadrus SS2/1	0.0145297	0.024037	0.00666667
Anaerostipes hadrus HTF-920	0.0405518	0.0352767	0.0702377
Anaerostipes caccae DSM14662	0.0472582	0.0466667	0.080829
L- and D-lactate quantification
	Net production (mM)
	L-lactate -G	D-lactate -G	L-lactate +G	D-lactate +G
Anaerostipes caccae DSM14662	-17.6092	-16.4225	-4.57417	-15.1675
Anaerostipes hadrus SS2/1	0.168167	-21.2465	7.84433	-20.1127
Anaerostipes hadrus SSC/2	1.11333	-15.6317	0.456667	-21.9817
Anaerostipes hadrus HTF-920	-6.58	-16.5119	-2.461	-17.4408
Coprococcus catus GD/7	-21.697	-16.498	-18.011	-13.584
Anaerobutyricum soehngenii L2-7	-21.6823	-16.286	1.813	-7.168
Anaerobutyricum soehngenii SL6/1/1	-21.6825	-16.2525	-1.06317	-4.1885
Anaerobutyricum soehngenii HTF-83D	-21.5565	-14.3399	-13.6668	-8.34092
Anaerobutyricum hallii SM6/1	-21.6713	-16.1337	-7.73467	-7.96033
Anaerobutyricum hallii DSM3353	-18.0403	-12.1749	-14.2177	-12.9875
L- and D-lactate utilization repression in the presence of hexose
	Pair-matched replicates	Difference in L-lactate utilisation with hexose present (mM)	Difference in D-lactate utilisation with hexose present (mM)	P-value comparing L-lactate vs D-lactate	Statistically significant difference between L- and D-lactate repression?
Anaerostipes caccae DSM14662	i	2.31	1.61	-
	ii	17.09	3.49	-
	iii	15.969	8.865	0.195447	No
Anaerostipes hadrus SS2/1	i	5.922	3.948	-
	ii	5.729	0.263	-
	iii	7.7595	0.8095	0.0829538	No
Anaerostipes hadrus SSC/2	i	1.28	2.639	-
	ii	1.524	5.096	-
	iii	0.909	11.315	0.201233	No
Anaerostipes hadrus HTF-920	i	2.899	2.86892	-
	ii	2.113	3.61308	-
	iii	11.571	3.53092	0.536215	No
Coprococcus catus GD/7	i	4.3435	3.3065	-
	ii	4.161	4.029	-
	iii	2.5535	1.4065	0.138385	No
Anaerobutyricum soehngenii L2-7	i	19.968	9.422	-
	ii	17.7265	12.0425	-
	iii	18.5085	5.8895	0.042768	Yes
Anaerobutyricum soehngenii SL6/1/1	i	20.3785	11.5615	-
	ii	20.998	10.732	-
	iii	20.4815	13.8985	0.0153182	Yes
Anaerobutyricum soehngenii HTF-83D	i	2.1185	0.921582	-
	ii	10.381	4.4619	-
	iii	11.1695	12.6135	0.4726	No
Anaerobutyricum hallii SM6/1	i	15.4735	4.2565	-
	ii	5.8425	4.7275	-
	iii	20.494	15.536	0.189377	No
Anaerobutyricum hallii DSM3353	i	5.094	3.59392	-
	ii	5.8805	2.11958	-
	iii	0.4935	0.963418	0.321398	No

## Sheet: Table S4. OD0.3 G&F measures
Culture	mM of glucose remaining
L2-7_G1	7.042		L2-7 = A. soehngenii
	7.143		GD/7 = C. catus
L2-7_G2	7.476
	7.63		G = growth on glucose
L2-7_G3	6.801		LG = growth on lactate plus glucose
	6.317
	7.165		F = growth on fructose
L2-7_G4	8.128		LF = growth on lactate plus fructose
	8.023
L2-7_G5	5.576		Numbers at end indicate replicate number of each culture type
	5.643
L2-7_G6	7.755
	7.665
L2-7_G7	8.894
	9.245
L2-7_G8	6.707
	6.752
L2-7_LG1	7.58
	7.64
L2-7_LG2	8.926
	8.087
L2-7_LG3	7.67
	7.789
L2-7_LG4	6.528
	6.835
L2-7_LG5	7.222
	7.216
L2-7_LG6	8.185
	8.068
L2-7_LG7	7.012
	6.968
L2-7_LG8	7.795
	7.752
Culture	mM of fructose remaining
GD/7_F1	7.51554
	8.29263
	8.19272
	8.10946
GD/7_F2	8.0373
	7.98179
	7.87633
	7.86523
GD/7_F3	7.37123
	7.44893
	7.1714
	7.25466
GD/7_F4	7.96514
	8.15386
	7.53219
	7.57105
GD/7_F5	7.82083
	7.88188
	7.52664
	7.52664
GD/7_F6	8.66452
	8.79218
	8.13721
	8.26488
GD/7_F7	6.48313
	7.21581
	6.91052
	6.96048
GD/7_F8	8.22047
	8.43139
	7.95959
	8.0151
GD/7_LF1	7.63766
	7.72091
	7.30462
	7.24911
GD/7_LF2	7.08814
	7.5877
	7.23801
	7.31572
GD/7_LF3	6.77176
	6.71625
	6.94938
	6.99378
GD/7_LF4	7.5766
	7.71536
	7.1714
	7.18806
GD/7_LF5	8.57016
	8.74223
	8.0484
	8.11501
GD/7_LF6	8.57016
	8.17052
	8.14831
	8.13166
GD/7_LF7	8.48135
	8.43139
	8.72003
	8.36479
GD/7_LF8	7.93739
	7.68206

## Sheet: Table S5. DEG overview
Comparison	No. of Differentially Expressed Genes (FDR < 0.05)
A. soehngenii L2-7
Glucose vs. Lactate	1427
Glucose vs. Combined	25
Lactate vs. Combined	1469
C. catus GD/7
Fructose vs. Lactate	1689
Fructose vs. Combined	1762
Lactate vs. Combined	1218

## Sheet: Table S6. DEG A.s. L2-7;G vs L
Locus ID	Gene Name	logFC	logCPM	LR	PValue	FDR
L2-7_01905	lctE	-14.3356	13.2837	388.321	1.92e-86	1.79e-83
L2-7_01906	lctD	-14.2421	14.0668	182.045	1.73e-41	2.11e-39
L2-7_01908	lctC	-14.2045	13.9951	167.949	2.08e-38	1.94e-36
L2-7_01909	lctG	-14.1136	14.6048	183.429	8.64e-42	1.1e-39
L2-7_01907	lctB	-14.0902	13.6473	144.96	2.19e-33	1.57e-31
L2-7_01910	lctF	-14.0038	14.8201	181.895	1.87e-41	2.15e-39
L2-7_02157	glpF_1	-6.34461	7.57356	181.841	1.92e-41	2.15e-39
L2-7_02596	L2-7_02596	-5.69347	2.27054	82.9748	8.31e-20	2.02e-18
L2-7_02597	L2-7_02597	-5.65337	1.18765	70.1548	5.48e-17	1.07e-15
L2-7_02158	L2-7_02158	-5.28911	7.70608	154.893	1.48e-35	1.25e-33
L2-7_02594	L2-7_02594	-5.24712	5.78262	43.8287	3.58e-11	3.76e-10
L2-7_01660	L2-7_01660	-4.92403	7.99657	23.0266	1.6e-06	8.07e-06
L2-7_02595	L2-7_02595	-4.85531	7.15377	37.8724	7.55e-10	6.61e-09
L2-7_01880	L2-7_01880	-4.84006	3.97648	61.3789	4.71e-15	7.41e-14
L2-7_01498	ackA	-4.60496	7.99337	170.281	6.42e-39	6.21e-37
L2-7_01879	ltrA_3	-4.60475	5.70238	58.9879	1.59e-14	2.35e-13
L2-7_01881	L2-7_01881	-4.33447	1.87055	55.8023	8.01e-14	1.09e-12
L2-7_00821	hndA	-4.32592	7.61959	142.161	8.97e-33	5.84e-31
L2-7_00914	L2-7_00914	-4.3231	5.7317	142.107	9.22e-33	5.87e-31
L2-7_01884	L2-7_01884	-4.31634	4.95402	45.1769	1.8e-11	1.97e-10
L2-7_00924	L2-7_00924	-4.19213	10.5445	114.486	1.02e-26	3.97e-25
L2-7_00926	araQ	-4.12686	7.58681	122.871	1.49e-28	6.72e-27
L2-7_00822	hndC	-4.06914	9.59952	117.449	2.29e-27	9.3e-26
L2-7_00925	araP	-4.00681	7.95512	124.314	7.19e-29	3.36e-27
L2-7_01661	L2-7_01661	-4.00394	4.45569	25.4851	4.46e-07	2.48e-06
L2-7_00916	cgkA_2	-3.97682	9.45281	259.048	2.77e-58	7.05e-56
L2-7_00823	hndD_1	-3.97576	9.52364	147.362	6.54e-34	5.24e-32
L2-7_00915	marA	-3.89855	6.92456	110.833	6.44e-26	2.37e-24
L2-7_00917	L2-7_00917	-3.86997	6.77479	409.562	4.57e-91	6.4e-88
L2-7_01002	relA_1	-3.86349	8.60591	186.117	2.24e-42	2.99e-40
L2-7_01878	ltrA_2	-3.8193	4.82343	60.623	6.91e-15	1.06e-13
L2-7_00927	exuR	-3.7396	8.64442	140.724	1.85e-32	1.15e-30
L2-7_01877	L2-7_01877	-3.62839	2.54744	31.5155	1.98e-08	1.4e-07
L2-7_00126	fucO	-3.59272	8.58069	159.325	1.59e-36	1.44e-34
L2-7_01463	sdcS	-3.4315	1.33387	90.0733	2.29e-21	6.12e-20
L2-7_00928	malQ_2	-3.36527	9.06086	146.293	1.12e-33	8.72e-32
L2-7_01663	L2-7_01663	-3.36333	4.47781	21.4956	3.55e-06	1.7e-05
L2-7_00919	L2-7_00919	-3.33603	6.86483	319.975	1.47e-71	1.03e-68
L2-7_00380	rnfE	-3.32675	7.86891	310.347	1.84e-69	1.03e-66
L2-7_02492	glpK	-3.31865	12.4435	85.5192	2.29e-20	5.79e-19
L2-7_01536	garR	-3.29871	1.47209	107.681	3.16e-25	1.12e-23
L2-7_00918	cgkA_3	-3.29393	6.82906	289.165	7.56e-65	3.03e-62
L2-7_00920	ecfT_2	-3.28472	6.61518	306.772	1.1e-68	5.15e-66
L2-7_01462	ttdA_1	-3.28214	2.0442	145.278	1.87e-33	1.38e-31
L2-7_02138	pduE	-3.27908	11.0365	127.154	1.72e-29	8.6e-28
L2-7_00921	ykoD_2	-3.27397	7.75955	244.804	3.53e-55	6.59e-53
L2-7_00381	rnfA	-3.27384	6.57652	414.9	3.14e-92	8.81e-89
L2-7_02137	pduD	-3.25595	11.8422	125.07	4.91e-29	2.37e-27
L2-7_01669	mglC	-3.24598	6.46328	152.496	4.94e-35	4.07e-33
L2-7_00382	rnfB	-3.24315	8.25532	265.894	8.91e-60	2.5e-57
L2-7_02164	galT	-3.24315	5.65745	278.503	1.59e-62	5.57e-60
L2-7_00922	L2-7_00922	-3.20848	7.37743	245.129	2.99e-55	5.99e-53
L2-7_00379	rnfG	-3.19522	7.83364	246.068	1.87e-55	4.03e-53
L2-7_01003	fus	-3.18262	10.6704	96.1396	1.07e-22	3.26e-21
L2-7_02146	sucD	-3.17562	11.4182	92.5442	6.58e-22	1.88e-20
L2-7_02144	ccmL	-3.17316	8.78636	109.515	1.25e-25	4.55e-24
L2-7_02136	pduC	-3.15835	13.2131	117.467	2.27e-27	9.3e-26
L2-7_02143	L2-7_02143	-3.12937	10.7929	105.245	1.08e-24	3.64e-23
L2-7_02145	yvqK	-3.12051	11.2571	103.074	3.23e-24	1.03e-22
L2-7_02142	dnaK_2	-3.11216	10.9013	107.838	2.92e-25	1.05e-23
L2-7_01809	L2-7_01809	-3.10329	3.03499	30.6152	3.15e-08	2.14e-07
L2-7_02139	ddrA_2	-3.09948	12.6976	133.607	6.66e-31	3.81e-29
L2-7_00202	L2-7_00202	-3.09883	6.02403	132.757	1.02e-30	5.73e-29
L2-7_00378	rnfD	-3.08099	8.22982	246.471	1.53e-55	3.57e-53
L2-7_02135	pduB_2	-3.07341	12.3684	114.613	9.57e-27	3.78e-25
L2-7_02147	rnfC_2	-3.07238	11.1179	95.569	1.43e-22	4.26e-21
L2-7_02141	L2-7_02141	-3.01305	10.8114	117.858	1.86e-27	7.79e-26
L2-7_02148	L2-7_02148	-3.00728	9.74144	89.7427	2.71e-21	7.17e-20
L2-7_02134	pduA	-2.96252	10.797	135.438	2.65e-31	1.55e-29
L2-7_02140	L2-7_02140	-2.96004	8.94429	124.128	7.9e-29	3.63e-27
L2-7_01911	lctA	-2.95301	7.73899	113.099	2.05e-26	7.77e-25
L2-7_02163	galK	-2.95239	4.62877	180.593	3.6e-41	3.88e-39
L2-7_00632	L2-7_00632	-2.92423	4.29814	66.0888	4.31e-16	7.6e-15
L2-7_00377	rnfC_1	-2.89951	9.16283	243.755	5.97e-55	1.05e-52
L2-7_01670	mglA_2	-2.85297	6.79085	111.268	5.17e-26	1.93e-24
L2-7_00923	sugC_1	-2.78794	10.0806	70.3342	5.01e-17	9.81e-16
L2-7_02826	L2-7_02826	-2.74772	6.81387	228.146	1.51e-51	2.35e-49
L2-7_01656	L2-7_01656	-2.7379	3.99987	12.3599	0.000438665	0.00137096
L2-7_02786	L2-7_02786	-2.72857	7.16816	170.569	5.56e-39	5.56e-37
L2-7_01014	dhaD	-2.6775	10.7799	79.7144	4.33e-19	9.7e-18
L2-7_01671	mglB_2	-2.66787	8.65963	56.8999	4.59e-14	6.36e-13
L2-7_02039	L2-7_02039	-2.5477	2.79643	86.709	1.26e-20	3.23e-19
L2-7_00781	ptsG_1	-2.47884	4.74053	142.596	7.2e-33	4.81e-31
L2-7_00346	hppA1	-2.45102	5.19379	69.7856	6.61e-17	1.25e-15
L2-7_00505	spoVG	-2.38667	10.0316	79.5939	4.6e-19	1.01e-17
L2-7_02451	L2-7_02451	-2.38629	1.63213	55.5217	9.24e-14	1.25e-12
L2-7_02087	L2-7_02087	-2.36506	10.6999	59.5533	1.19e-14	1.8e-13
L2-7_00206	L2-7_00206	-2.30746	3.68007	106.392	6.05e-25	2.12e-23
L2-7_02153	pduU_1	-2.30605	6.90224	188.869	5.61e-43	7.87e-41
L2-7_02898	xre	-2.29989	2.08573	14.0541	0.000177625	0.000613693
L2-7_01126	L2-7_01126	-2.28113	4.48653	32.6079	1.13e-08	8.25e-08
L2-7_02151	mtnK_2	-2.27797	8.42828	128.448	8.96e-30	4.67e-28
L2-7_00751	thlA	-2.26967	14.8947	100.491	1.19e-23	3.74e-22
L2-7_00519	L2-7_00519	-2.26351	7.72566	105.367	1.01e-24	3.47e-23
L2-7_01913	ptsN	-2.24997	3.92618	132.599	1.11e-30	6.08e-29
L2-7_02152	pduV_3	-2.24428	6.93167	171.567	3.37e-39	3.49e-37
L2-7_01657	drrA_3	-2.22991	3.90083	10.6112	0.00112404	0.00319984
L2-7_01683	L2-7_01683	-2.19714	11.2042	90.0809	2.29e-21	6.12e-20
L2-7_00520	L2-7_00520	-2.17901	7.95964	105.74	8.41e-25	2.91e-23
L2-7_00649	L2-7_00649	-2.17736	6.30324	114.959	8.03e-27	3.22e-25
L2-7_00403	L2-7_00403	-2.16704	8.29909	124.542	6.41e-29	3.05e-27
L2-7_02442	pta_2	-2.16498	9.6425	92.2812	7.52e-22	2.13e-20
L2-7_00402	purE_2	-2.12082	7.4043	158.964	1.91e-36	1.67e-34
L2-7_01658	L2-7_01658	-2.11959	3.14704	9.57979	0.00196731	0.00530039
L2-7_03070	L2-7_03070	-2.11685	-0.0711698	4.19817	0.0404677	0.0751926
L2-7_02150	mtnK_1	-2.09415	8.08219	104.017	2.01e-24	6.61e-23
L2-7_01286	yiaM	-2.09398	5.98753	2.57461	0.108591	0.172686
L2-7_02818	L2-7_02818	-2.08002	9.32532	127.506	1.44e-29	7.33e-28
L2-7_01662	apxIB	-2.07938	3.12664	12.0815	0.000509235	0.00155603
L2-7_01795	cspB	-2.06034	3.39385	22.3693	2.25e-06	1.11e-05
L2-7_00752	echA8	-2.04919	13.917	94.9087	1.99e-22	5.88e-21
L2-7_02089	L2-7_02089	-2.03601	4.30422	24.4718	7.54e-07	4.02e-06
L2-7_01461	ttdB	-2.00194	1.95267	57.4538	3.46e-14	4.95e-13
L2-7_02088	L2-7_02088	-2.00006	4.76021	25.6703	4.05e-07	2.27e-06
L2-7_01537	L2-7_01537	-1.98817	3.03814	93.9898	3.17e-22	9.16e-21
L2-7_03058	L2-7_03058	-1.94209	15.8205	2.88217	0.0895652	0.146333
L2-7_00679	ddrA_1	-1.94008	8.33886	120.339	5.33e-28	2.33e-26
L2-7_01932	ssrA	-1.92498	13.7969	34.816	3.62e-09	2.86e-08
L2-7_01285	siaT_1	-1.87439	8.79468	2.44541	0.117869	0.185336
L2-7_02239	nifJ	-1.87381	16.6492	58.1273	2.46e-14	3.59e-13
L2-7_02427	dfx	-1.86809	10.3037	27.6995	1.42e-07	8.76e-07
L2-7_01287	siaP_1	-1.86461	8.26346	2.29361	0.129907	0.201551
L2-7_00580	araB_2	-1.85873	8.66637	84.2128	4.44e-20	1.1e-18
L2-7_02040	lytR_2	-1.84866	4.80956	64.7315	8.58e-16	1.46e-14
L2-7_00579	ywlF	-1.82314	5.97334	68.5663	1.23e-16	2.26e-15
L2-7_02510	L2-7_02510	-1.81346	10.008	42.1273	8.55e-11	8.44e-10
L2-7_02530	cbiO	-1.79874	6.29143	24.3469	8.05e-07	4.27e-06
L2-7_02579	L2-7_02579	-1.79769	0.661047	14.1022	0.000173142	0.000602662
L2-7_01659	L2-7_01659	-1.78123	3.34811	8.72823	0.00313321	0.00792292
L2-7_01127	L2-7_01127	-1.7802	3.32912	16.5054	4.85e-05	0.000188266
L2-7_02992	L2-7_02992	-1.77926	6.5071	68.758	1.11e-16	2.07e-15
L2-7_01981	L2-7_01981	-1.77007	6.11451	12.5206	0.000402499	0.00127005
L2-7_00753	mmgB	-1.75989	14.2923	73.9893	7.85e-18	1.59e-16
L2-7_02315	L2-7_02315	-1.74571	2.35461	42.5726	6.81e-11	6.84e-10
L2-7_02474	cgkA_6	-1.73083	4.03973	60.6931	6.67e-15	1.03e-13
L2-7_01289	eda	-1.72675	8.43242	1.24439	0.264626	0.352919
L2-7_02531	nikQ	-1.72578	6.90323	27.215	1.82e-07	1.09e-06
L2-7_00578	yutF	-1.71934	6.96773	73.8919	8.25e-18	1.66e-16
L2-7_02511	glpF_2	-1.71338	12.6742	33.2929	7.93e-09	5.99e-08
L2-7_01288	kdgK	-1.69494	7.64174	1.95277	0.162289	0.239572
L2-7_00816	L2-7_00816	-1.69214	10.3087	9.92412	0.00163127	0.0044768
L2-7_00824	glgA_1	-1.68442	8.97991	90.4575	1.89e-21	5.19e-20
L2-7_00492	pepA	-1.67454	9.14215	68.486	1.28e-16	2.34e-15
L2-7_02094	L2-7_02094	-1.64173	4.45515	78.7561	7.03e-19	1.53e-17
L2-7_02993	L2-7_02993	-1.64103	9.18937	86.5158	1.39e-20	3.53e-19
L2-7_02093	L2-7_02093	-1.63004	5.2742	82.3905	1.12e-19	2.67e-18
L2-7_02896	L2-7_02896	-1.6295	3.65426	14.5906	0.000133577	0.00047139
L2-7_02897	ypdB	-1.62585	4.38656	12.3589	0.000438888	0.00137096
L2-7_00577	egsA_1	-1.61187	7.82145	44.7435	2.25e-11	2.44e-10
L2-7_01216	gerAA	-1.61	1.98025	17.5922	2.74e-05	0.000112291
L2-7_01077	nifD_1	-1.6096	6.13782	37.8327	7.71e-10	6.71e-09
L2-7_00980	L2-7_00980	-1.59333	7.02283	103.088	3.21e-24	1.03e-22
L2-7_00522	L2-7_00522	-1.59316	3.03245	63.2002	1.87e-15	3.06e-14
L2-7_00419	L2-7_00419	-1.59239	3.52767	57.4423	3.48e-14	4.95e-13
L2-7_01016	L2-7_01016	-1.59087	6.67319	120.072	6.1e-28	2.63e-26
L2-7_01078	bchB	-1.58717	5.97238	32.4414	1.23e-08	8.92e-08
L2-7_02578	L2-7_02578	-1.58117	0.546516	10.5176	0.00118242	0.00334999
L2-7_02092	L2-7_02092	-1.57998	5.82254	129.802	4.53e-30	2.44e-28
L2-7_01123	srlR_2	-1.57926	5.11406	104.581	1.51e-24	5.03e-23
L2-7_00726	ybhF_2	-1.57361	12.082	5.05212	0.0245958	0.048599
L2-7_01169	cgkA_5	-1.57263	7.54875	84.0687	4.78e-20	1.17e-18
L2-7_01914	manP	-1.57262	5.14565	128.436	9.01e-30	4.67e-28
L2-7_01076	nifH1_1	-1.56925	4.54218	59.5432	1.2e-14	1.8e-13
L2-7_00527	atpH_1	-1.56594	8.58678	76.4026	2.31e-18	4.91e-17
L2-7_01912	spoIIID	-1.56311	5.48019	52.9633	3.4e-13	4.29e-12
L2-7_00782	mapP	-1.54699	3.06694	35.6864	2.32e-09	1.86e-08
L2-7_02095	L2-7_02095	-1.5461	5.28212	62.0898	3.28e-15	5.25e-14
L2-7_00526	atpA_1	-1.53462	10.3272	58.3393	2.21e-14	3.24e-13
L2-7_01553	pncC	-1.53152	8.50884	52.2833	4.8e-13	5.9e-12
L2-7_00529	atpE_1	-1.52376	7.32013	100.365	1.27e-23	3.95e-22
L2-7_01811	L2-7_01811	-1.50925	3.77466	22.7359	1.86e-06	9.28e-06
L2-7_00525	atpG_1	-1.50844	9.4326	65.165	6.89e-16	1.18e-14
L2-7_00815	accD	-1.50728	10.7205	3.32857	0.0680861	0.116328
L2-7_02259	mtnK_3	-1.50704	6.76591	65.9034	4.74e-16	8.29e-15
L2-7_00845	L2-7_00845	-1.50483	2.74304	17.4161	3e-05	0.00012229
L2-7_01864	L2-7_01864	-1.50023	5.57268	121.662	2.74e-28	1.22e-26
L2-7_02473	L2-7_02473	-1.49426	3.9652	37.8414	7.67e-10	6.7e-09
L2-7_02509	L2-7_02509	-1.48972	7.7203	27.4319	1.63e-07	9.87e-07
L2-7_02811	L2-7_02811	-1.48589	5.56043	27.5951	1.5e-07	9.17e-07
L2-7_00528	atpF_1	-1.47843	8.40989	65.3588	6.24e-16	1.08e-14
L2-7_02060	L2-7_02060	-1.477	4.31373	50.2279	1.37e-12	1.64e-11
L2-7_01572	L2-7_01572	-1.4763	7.30938	14.6183	0.000131628	0.000465448
L2-7_00812	accB	-1.47557	8.30062	2.57194	0.108774	0.172879
L2-7_02269	asnS	-1.47511	6.45107	27.1434	1.89e-07	1.12e-06
L2-7_00506	glgC_1	-1.47075	10.5771	25.0501	5.59e-07	3.06e-06
L2-7_02524	pduV_5	-1.46271	6.91451	74.4869	6.1e-18	1.26e-16
L2-7_01573	L2-7_01573	-1.46175	11.5915	16.6808	4.42e-05	0.0001738
L2-7_02472	ecfT_4	-1.4591	3.75648	40.0836	2.43e-10	2.28e-09
L2-7_00817	L2-7_00817	-1.45578	8.39559	4.43422	0.0352253	0.0667313
L2-7_01290	yjmC	-1.4527	8.27414	0.905428	0.34133	0.432764
L2-7_02638	L2-7_02638	-1.45151	7.06862	103.755	2.29e-24	7.46e-23
L2-7_00813	fabZ	-1.44781	7.98307	2.5267	0.111934	0.177598
L2-7_00814	accC	-1.44734	10.3139	2.81953	0.0931234	0.151177
L2-7_02006	rbr3A	-1.4433	10.1856	16.9942	3.75e-05	0.000150084
L2-7_02525	pduU_2	-1.44316	6.09149	48.5832	3.17e-12	3.64e-11
L2-7_00229	acdA_1	-1.44152	4.39834	40.6542	1.82e-10	1.74e-09
L2-7_01027	araB_3	-1.43997	9.39018	37.4487	9.38e-10	8.02e-09
L2-7_00523	atpC_1	-1.43785	8.69434	59.5901	1.17e-14	1.78e-13
L2-7_00491	gltA	-1.43709	7.78379	20.239	6.83e-06	3.11e-05
L2-7_02827	L2-7_02827	-1.43478	4.80626	59.0683	1.52e-14	2.27e-13
L2-7_02532	nikMN	-1.43365	8.10037	14.5228	0.000138472	0.000487436
L2-7_00507	glgC_2	-1.43164	11.5882	27.5385	1.54e-07	9.42e-07
L2-7_00760	cat1_1	-1.43	10.3345	66.4898	3.52e-16	6.28e-15
L2-7_00524	atpD_1	-1.42278	10.3617	54.6761	1.42e-13	1.85e-12
L2-7_00393	L2-7_00393	-1.4209	4.20499	26.0788	3.28e-07	1.88e-06
L2-7_00137	L2-7_00137	-1.41895	5.40258	78.4678	8.13e-19	1.74e-17
L2-7_00530	atpB_1	-1.41776	8.56941	69.9137	6.2e-17	1.19e-15
L2-7_02630	cas1_2	-1.40679	6.00446	66.4896	3.52e-16	6.28e-15
L2-7_02263	L2-7_02263	-1.38995	5.3231	136.859	1.29e-31	7.88e-30
L2-7_02576	mobA_4	-1.38006	1.45321	12.7155	0.000362634	0.00115204
L2-7_02676	araB_4	-1.37925	3.43507	37.5879	8.74e-10	7.51e-09
L2-7_01866	pduB_1	-1.37616	7.84135	81.1384	2.1e-19	4.83e-18
L2-7_00550	L2-7_00550	-1.3729	3.04231	27.3124	1.73e-07	1.04e-06
L2-7_00882	L2-7_00882	-1.36978	1.69422	18.081	2.12e-05	8.87e-05
L2-7_02758	L2-7_02758	-1.36893	7.1667	53.4816	2.61e-13	3.36e-12
L2-7_02840	L2-7_02840	-1.36515	8.07887	94.0523	3.07e-22	8.97e-21
L2-7_02417	rpfG_1	-1.36162	8.09322	36.3367	1.66e-09	1.37e-08
L2-7_02418	alsB	-1.36076	6.78802	40.1413	2.36e-10	2.23e-09
L2-7_02469	L2-7_02469	-1.35459	3.62031	36.763	1.33e-09	1.12e-08
L2-7_00725	L2-7_00725	-1.35139	11.2273	3.88406	0.0487466	0.0875003
L2-7_01812	L2-7_01812	-1.34633	4.58359	16.8264	4.1e-05	0.000162099
L2-7_02226	L2-7_02226	-1.3445	1.21844	28.2748	1.05e-07	6.61e-07
L2-7_00727	L2-7_00727	-1.34432	11.4292	3.72561	0.0535839	0.0947066
L2-7_00232	frc	-1.34335	0.503299	13.9146	0.000191306	0.000656108
L2-7_00233	acrC	-1.34307	0.555421	15.3335	9.01e-05	0.000332086
L2-7_02876	L2-7_02876	-1.34004	3.87843	41.6546	1.09e-10	1.05e-09
L2-7_00294	trxA_1	-1.33355	5.55847	11.2403	0.000800381	0.00234099
L2-7_00810	fabG_2	-1.32415	9.0363	2.14857	0.142702	0.217075
L2-7_02091	L2-7_02091	-1.32351	5.26948	113.555	1.63e-26	6.26e-25
L2-7_00874	L2-7_00874	-1.32205	1.72879	23.0705	1.56e-06	7.9e-06
L2-7_01328	btr_2	-1.32146	5.11945	33.3408	7.73e-09	5.86e-08
L2-7_02470	L2-7_02470	-1.31885	3.67494	35.9251	2.05e-09	1.67e-08
L2-7_02317	L2-7_02317	-1.31873	0.386259	8.85955	0.00291559	0.00747437
L2-7_02866	sotB	-1.31232	3.47607	39.6521	3.03e-10	2.82e-09
L2-7_00314	mepA_3	-1.30822	7.54431	61.2995	4.9e-15	7.67e-14
L2-7_00576	sorC	-1.30465	5.83282	54.8442	1.3e-13	1.74e-12
L2-7_02316	L2-7_02316	-1.2741	1.28081	12.4895	0.000409235	0.00128985
L2-7_00711	L2-7_00711	-1.26359	-0.16013	3.36439	0.0666201	0.114311
L2-7_01867	sgcG_2	-1.2632	7.94001	66.155	4.17e-16	7.39e-15
L2-7_00783	malQ_1	-1.25816	4.19828	27.068	1.96e-07	1.16e-06
L2-7_02416	cph2_2	-1.25772	6.84158	18.0028	2.21e-05	9.18e-05
L2-7_00256	L2-7_00256	-1.2548	5.0278	45.9786	1.2e-11	1.33e-10
L2-7_01890	L2-7_01890	-1.24483	0.408215	9.67647	0.00186643	0.00505289
L2-7_00240	L2-7_00240	-1.23685	2.95969	47.027	7e-12	7.97e-11
L2-7_00241	L2-7_00241	-1.23656	2.2253	42.6557	6.53e-11	6.6e-10
L2-7_02759	L2-7_02759	-1.23094	7.0803	52.4822	4.34e-13	5.38e-12
L2-7_00811	fabF	-1.216	9.89294	2.0331	0.153906	0.229869
L2-7_00300	L2-7_00300	-1.21587	3.89012	9.51797	0.00203469	0.00542972
L2-7_02007	perR	-1.21089	6.86141	27.2112	1.82e-07	1.09e-06
L2-7_00301	L2-7_00301	-1.20904	6.1257	9.74268	0.00180038	0.00489774
L2-7_02059	mepA_10	-1.20828	5.50466	23.8573	1.04e-06	5.34e-06
L2-7_01015	pta_1	-1.20453	9.98603	20.3435	6.47e-06	2.97e-05
L2-7_00887	L2-7_00887	-1.19803	2.16459	19.5241	9.93e-06	4.43e-05
L2-7_01348	L2-7_01348	-1.1974	12.182	40.078	2.44e-10	2.28e-09
L2-7_00315	trxA_2	-1.19098	5.43006	8.42021	0.00371073	0.00916076
L2-7_01079	hypF	-1.19059	7.89067	25.428	4.59e-07	2.55e-06
L2-7_01640	luxQ_2	-1.1901	4.35154	44.7801	2.2e-11	2.4e-10
L2-7_02471	ykoD_4	-1.18486	4.56233	31.9424	1.59e-08	1.13e-07
L2-7_01810	L2-7_01810	-1.18064	3.02338	12.1997	0.000477975	0.00147013
L2-7_02948	degA_3	-1.1775	2.36277	25.7086	3.97e-07	2.24e-06
L2-7_00818	blaR1	-1.17676	7.31548	13.8708	0.000195821	0.000670769
L2-7_01612	lexA_2	-1.17124	8.44732	61.5912	4.23e-15	6.69e-14
L2-7_01173	tagB_3	-1.16959	8.20552	33.0908	8.8e-09	6.59e-08
L2-7_02225	L2-7_02225	-1.1645	1.06807	7.75808	0.00534727	0.012676
L2-7_01122	tal	-1.15712	7.25979	7.26337	0.00703751	0.016203
L2-7_00184	cas1_1	-1.15513	4.41507	10.1347	0.00145502	0.00404461
L2-7_01827	hemN	-1.15396	4.6056	57.0348	4.28e-14	6.03e-13
L2-7_00883	L2-7_00883	-1.14884	1.48678	11.06	0.000882095	0.00255863
L2-7_00147	L2-7_00147	-1.13974	0.936387	13.367	0.000256087	0.000854232
L2-7_02133	adhE_2	-1.13917	11.0539	36.1489	1.83e-09	1.5e-08
L2-7_02508	L2-7_02508	-1.13764	5.81351	44.6095	2.41e-11	2.6e-10
L2-7_01822	senX3	-1.13357	7.75642	63.8533	1.34e-15	2.25e-14
L2-7_02627	L2-7_02627	-1.12759	3.50259	13.5132	0.000236887	0.000796829
L2-7_02125	cat3	-1.12164	6.17655	60.8282	6.23e-15	9.7e-14
L2-7_00155	L2-7_00155	-1.11819	5.98706	8.47405	0.00360249	0.0089408
L2-7_01172	L2-7_01172	-1.11735	7.29153	41.7421	1.04e-10	1.01e-09
L2-7_02318	L2-7_02318	-1.10982	2.36956	12.8907	0.000330227	0.00106356
L2-7_01518	L2-7_01518	-1.10862	8.50602	43.4768	4.29e-11	4.44e-10
L2-7_01714	L2-7_01714	-1.10511	6.46146	46.1098	1.12e-11	1.26e-10
L2-7_01128	feoB_1	-1.09987	6.56845	4.80615	0.0283584	0.0549897
L2-7_01196	L2-7_01196	-1.09762	6.02323	4.3932	0.0360826	0.0681225
L2-7_00295	pspE	-1.09633	5.66593	7.45954	0.0063101	0.0146608
L2-7_02828	mtrR_2	-1.09446	3.35988	21.7152	3.16e-06	1.53e-05
L2-7_00498	L2-7_00498	-1.09195	5.86815	24.0505	9.38e-07	4.91e-06
L2-7_02733	cgkA_7	-1.08165	9.30773	40.0956	2.42e-10	2.27e-09
L2-7_00151	Int-Tn_1	-1.08055	8.95695	50.1883	1.4e-12	1.67e-11
L2-7_02464	L2-7_02464	-1.07916	7.15157	37.4725	9.27e-10	7.94e-09
L2-7_01865	cfiB_1	-1.07756	7.25331	28.5863	8.96e-08	5.72e-07
L2-7_00150	L2-7_00150	-1.07735	6.00835	21.1698	4.2e-06	1.99e-05
L2-7_02385	walK	-1.06274	7.28822	28.7559	8.21e-08	5.26e-07
L2-7_02267	L2-7_02267	-1.0614	6.10722	56.9103	4.56e-14	6.36e-13
L2-7_00439	L2-7_00439	-1.06127	3.89667	30.9625	2.63e-08	1.82e-07
L2-7_01713	L2-7_01713	-1.0601	6.61754	32.2123	1.38e-08	9.98e-08
L2-7_00341	mepH	-1.05985	9.2438	32.7513	1.05e-08	7.72e-08
L2-7_01552	pgsA_1	-1.05902	6.59634	21.3036	3.92e-06	1.86e-05
L2-7_02762	puuR_2	-1.05121	3.70664	26.2487	3e-07	1.73e-06
L2-7_00734	L2-7_00734	-1.04819	5.58673	37.3308	9.97e-10	8.47e-09
L2-7_02626	L2-7_02626	-1.04756	3.34767	20.4946	5.98e-06	2.75e-05
L2-7_02623	L2-7_02623	-1.04624	10.0757	37.2468	1.04e-09	8.81e-09
L2-7_00809	fabD	-1.0461	9.64963	1.62946	0.201777	0.286123
L2-7_00185	cas2_1	-1.04141	3.09526	7.74829	0.00537633	0.0127323
L2-7_02628	L2-7_02628	-1.03869	2.54006	14.0587	0.00017719	0.000613383
L2-7_01204	L2-7_01204	-1.0385	3.93746	1.08291	0.298047	0.388071
L2-7_00949	desK	-1.03816	3.56195	24.4911	7.47e-07	3.98e-06
L2-7_01647	L2-7_01647	-1.03545	3.25757	24.2978	8.25e-07	4.36e-06
L2-7_01295	L2-7_01295	-1.03453	2.42275	19.1693	1.2e-05	5.25e-05
L2-7_02497	L2-7_02497	-1.03402	6.1286	23.9405	9.94e-07	5.17e-06
L2-7_01975	L2-7_01975	-1.03263	7.98798	29.0142	7.19e-08	4.63e-07
L2-7_00947	L2-7_00947	-1.02661	4.38913	43.6741	3.88e-11	4.04e-10
L2-7_02266	L2-7_02266	-1.02241	6.30188	52.4072	4.51e-13	5.57e-12
L2-7_01083	L2-7_01083	-1.02011	5.18411	12.8629	0.000335165	0.00107648
L2-7_02702	L2-7_02702	-1.01589	4.98326	34.1531	5.09e-09	3.95e-08
L2-7_02869	L2-7_02869	-1.01457	5.17388	21.3316	3.86e-06	1.84e-05
L2-7_02821	L2-7_02821	-1.01052	5.29275	33.904	5.79e-09	4.46e-08
L2-7_02983	L2-7_02983	-1.00821	7.01638	32.6731	1.09e-08	8.02e-08
L2-7_02618	L2-7_02618	-1.00637	7.83898	28.559	9.09e-08	5.79e-07
L2-7_00993	L2-7_00993	-1.00619	6.71261	21.3834	3.76e-06	1.79e-05
L2-7_02658	L2-7_02658	-0.997246	2.21862	5.10818	0.0238133	0.047289
L2-7_00680	L2-7_00680	-0.996765	2.16058	13.8102	0.000202233	0.000690203
L2-7_01957	L2-7_01957	-0.98829	3.49443	34.1749	5.04e-09	3.92e-08
L2-7_00807	acpP_1	-0.984277	6.42216	1.10925	0.292244	0.382291
L2-7_02463	L2-7_02463	-0.983975	4.37689	24.537	7.29e-07	3.9e-06
L2-7_02761	L2-7_02761	-0.982714	6.77796	42.1602	8.41e-11	8.33e-10
L2-7_02419	gmr_3	-0.982211	6.71074	25.5543	4.3e-07	2.4e-06
L2-7_02760	L2-7_02760	-0.980603	6.45774	35.316	2.8e-09	2.23e-08
L2-7_02619	L2-7_02619	-0.978988	7.13905	34.5735	4.1e-09	3.22e-08
L2-7_02392	scrB	-0.978885	10.5517	0.353689	0.552032	0.638116
L2-7_02677	gpsA_2	-0.974713	1.3863	10.9564	0.000932803	0.00269455
L2-7_00808	L2-7_00808	-0.972192	9.90476	1.18015	0.277325	0.366885
L2-7_00183	L2-7_00183	-0.972006	3.52204	5.34737	0.0207536	0.0419946
L2-7_02386	yycF_2	-0.964852	6.96738	29.0859	6.92e-08	4.48e-07
L2-7_02822	L2-7_02822	-0.964271	5.50355	24.0506	9.38e-07	4.91e-06
L2-7_01844	L2-7_01844	-0.964218	6.03804	44.5153	2.52e-11	2.7e-10
L2-7_01792	rbr	-0.962117	10.4444	10.0021	0.00156358	0.00431458
L2-7_01813	L2-7_01813	-0.960775	4.71069	19.8266	8.48e-06	3.82e-05
L2-7_02982	L2-7_02982	-0.960733	8.8739	21.5742	3.4e-06	1.64e-05
L2-7_02616	L2-7_02616	-0.959065	8.22051	41.7485	1.04e-10	1.01e-09
L2-7_01080	L2-7_01080	-0.958787	4.26424	10.6632	0.00109291	0.00311846
L2-7_00117	sigA_3	-0.958244	6.40496	36.4256	1.59e-09	1.32e-08
L2-7_00994	lytG_1	-0.957585	7.68603	33.2299	8.19e-09	6.15e-08
L2-7_02393	bglF	-0.957232	10.4185	0.370228	0.54288	0.629875
L2-7_00118	L2-7_00118	-0.947189	7.45093	37.0419	1.16e-09	9.73e-09
L2-7_02505	L2-7_02505	-0.943965	5.38596	13.0913	0.000296676	0.000973403
L2-7_00433	angR	-0.940342	0.183143	7.63012	0.00574015	0.0134481
L2-7_02391	iolC	-0.940021	9.76603	0.319548	0.57188	0.655809
L2-7_01541	L2-7_01541	-0.939097	3.02693	19.2921	1.12e-05	4.96e-05
L2-7_00116	dnaG_1	-0.938831	7.94618	25.6512	4.09e-07	2.29e-06
L2-7_00844	ktrA_2	-0.93803	5.52769	11.6061	0.000657344	0.00195759
L2-7_02400	spoVD_1	-0.936739	6.65102	81.2574	1.98e-19	4.59e-18
L2-7_00784	lacA_1	-0.935196	3.18788	18.112	2.08e-05	8.75e-05
L2-7_02468	yeaJ_1	-0.934616	4.99794	22.0937	2.6e-06	1.27e-05
L2-7_02264	L2-7_02264	-0.932122	5.93331	35.424	2.65e-09	2.12e-08
L2-7_00480	nagD	-0.930968	6.79138	35.9751	2e-09	1.64e-08
L2-7_01519	L2-7_01519	-0.929402	5.66062	19.6212	9.44e-06	4.22e-05
L2-7_01198	ctpV	-0.926628	7.49402	2.88978	0.0891434	0.145729
L2-7_02374	yedA	-0.924809	5.68535	30.7732	2.9e-08	2e-07
L2-7_02384	L2-7_02384	-0.920602	8.25541	18.3618	1.83e-05	7.8e-05
L2-7_00497	L2-7_00497	-0.919524	5.09606	16.5676	4.69e-05	0.000183212
L2-7_01202	L2-7_01202	-0.918492	4.64747	1.06092	0.303006	0.39343
L2-7_02162	lacR	-0.918432	4.86638	27.7717	1.37e-07	8.48e-07
L2-7_02058	L2-7_02058	-0.916154	6.13569	18.0757	2.12e-05	8.88e-05
L2-7_01074	bar	-0.915699	6.02027	35.303	2.82e-09	2.23e-08
L2-7_02049	ywqN_1	-0.910219	6.45522	30.8985	2.72e-08	1.88e-07
L2-7_02701	dapE	-0.908812	6.03819	30.015	4.29e-08	2.85e-07
L2-7_00965	srlR_1	-0.908218	8.40083	31.1459	2.39e-08	1.68e-07
L2-7_01850	L2-7_01850	-0.905801	1.61122	12.7916	0.000348176	0.00110988
L2-7_00931	pgcA	-0.905793	11.6919	24.6518	6.87e-07	3.71e-06
L2-7_02166	L2-7_02166	-0.905628	4.60881	18.7813	1.47e-05	6.35e-05
L2-7_01171	yjjP	-0.904311	7.29894	49.3937	2.09e-12	2.46e-11
L2-7_02441	cat1_2	-0.903536	9.53099	14.6395	0.000130155	0.000461055
L2-7_00029	L2-7_00029	-0.902677	6.38775	35.9262	2.05e-09	1.67e-08
L2-7_00332	bioB_1	-0.902351	6.40193	4.16536	0.0412587	0.0765609
L2-7_02345	L2-7_02345	-0.895763	3.58266	14.092	0.000174087	0.000604451
L2-7_02617	pleC_1	-0.8953	8.21973	32.2186	1.38e-08	9.97e-08
L2-7_02327	L2-7_02327	-0.89476	8.91592	28.9614	7.38e-08	4.74e-07
L2-7_02567	L2-7_02567	-0.894404	8.72673	33.4232	7.41e-09	5.64e-08
L2-7_00948	degU_2	-0.89156	2.98499	20.9886	4.62e-06	2.17e-05
L2-7_00143	L2-7_00143	-0.89149	2.17286	16.8047	4.14e-05	0.000163736
L2-7_01628	L2-7_01628	-0.891123	5.536	35.5858	2.44e-09	1.95e-08
L2-7_02700	L2-7_02700	-0.890637	4.35213	24.8313	6.26e-07	3.4e-06
L2-7_01375	L2-7_01375	-0.889794	6.20969	18.1755	2.01e-05	8.51e-05
L2-7_00464	L2-7_00464	-0.887826	6.18808	46.661	8.44e-12	9.53e-11
L2-7_02268	L2-7_02268	-0.883923	5.77868	45.3402	1.66e-11	1.83e-10
L2-7_01525	L2-7_01525	-0.883049	2.15123	16.0718	6.1e-05	0.000231543
L2-7_00386	comM	-0.881662	3.72018	7.36899	0.00663582	0.0153286
L2-7_01853	L2-7_01853	-0.880951	0.0841989	3.82852	0.0503873	0.0899842
L2-7_00025	lspA	-0.879813	3.82713	18.9645	1.33e-05	5.8e-05
L2-7_01549	spoIIIE	-0.877189	7.89066	32.6267	1.12e-08	8.19e-08
L2-7_01001	L2-7_01001	-0.8744	5.06576	17.0376	3.66e-05	0.000147112
L2-7_02227	dut	-0.874158	1.65513	12.8302	0.00034107	0.00109096
L2-7_00344	eutL_2	-0.872565	6.36561	39.0667	4.1e-10	3.74e-09
L2-7_01685	L2-7_01685	-0.872081	6.3094	31.9248	1.6e-08	1.14e-07
L2-7_02775	yrpC	-0.870404	6.17624	42.3264	7.72e-11	7.67e-10
L2-7_00343	eutL_1	-0.868779	5.762	45.8354	1.29e-11	1.43e-10
L2-7_00532	L2-7_00532	-0.865649	5.31217	32.8794	9.81e-09	7.27e-08
L2-7_00737	L2-7_00737	-0.865094	2.37203	18.1522	2.04e-05	8.58e-05
L2-7_02984	ltrA_4	-0.863927	4.90769	2.38342	0.122629	0.191852
L2-7_01031	dacF_2	-0.862482	3.45925	25.304	4.9e-07	2.72e-06
L2-7_02265	L2-7_02265	-0.862117	5.83882	27.6169	1.48e-07	9.09e-07
L2-7_00871	L2-7_00871	-0.861974	2.18612	9.40839	0.00215994	0.00572307
L2-7_03026	L2-7_03026	-0.861184	5.92365	21.8306	2.98e-06	1.44e-05
L2-7_02506	L2-7_02506	-0.860728	6.16554	16.3073	5.39e-05	0.000206561
L2-7_02756	L2-7_02756	-0.859756	5.7918	32.1878	1.4e-08	1.01e-07
L2-7_01084	nifH1_2	-0.855818	7.00606	8.17936	0.00423697	0.0103145
L2-7_01823	L2-7_01823	-0.855493	7.15499	56.9674	4.43e-14	6.21e-13
L2-7_00728	L2-7_00728	-0.85533	7.65422	3.39057	0.0655704	0.112855
L2-7_02238	L2-7_02238	-0.854052	4.02327	8.45942	0.00363157	0.00898911
L2-7_02705	L2-7_02705	-0.850575	7.17418	17.3876	3.05e-05	0.0001236
L2-7_00028	L2-7_00028	-0.850291	5.18285	30.891	2.73e-08	1.88e-07
L2-7_00316	cdr_2	-0.848469	8.73057	5.051	0.0246117	0.048599
L2-7_01203	L2-7_01203	-0.845755	3.13519	0.735682	0.391048	0.485045
L2-7_01322	L2-7_01322	-0.844283	6.19584	12.311	0.000450291	0.00139725
L2-7_00390	L2-7_00390	-0.842179	8.23657	33.2385	8.15e-09	6.14e-08
L2-7_02041	L2-7_02041	-0.840676	2.0723	2.19697	0.138282	0.211384
L2-7_02824	L2-7_02824	-0.838793	3.74978	9.3436	0.00223766	0.00589278
L2-7_01845	L2-7_01845	-0.838314	4.69936	30.5918	3.18e-08	2.17e-07
L2-7_01292	uxuA	-0.833369	7.25163	3.54904	0.0595798	0.103945
L2-7_02219	L2-7_02219	-0.831322	3.59058	4.14788	0.0416867	0.0772017
L2-7_02825	L2-7_02825	-0.830974	3.51647	8.1827	0.00422917	0.0103061
L2-7_00490	L2-7_00490	-0.82893	6.43125	14.5175	0.000138867	0.000488212
L2-7_02739	L2-7_02739	-0.827663	6.08582	44.0648	3.18e-11	3.35e-10
L2-7_00180	cas5_1	-0.82689	2.70621	5.78034	0.0162064	0.0337607
L2-7_02740	L2-7_02740	-0.825564	5.30791	30.4283	3.46e-08	2.34e-07
L2-7_01082	hypE	-0.825534	7.33516	9.06795	0.00260128	0.00674263
L2-7_01543	L2-7_01543	-0.818325	1.2296	11.1428	0.000843605	0.00246227
L2-7_00389	codY	-0.817904	6.43419	10.5234	0.00117871	0.00334286
L2-7_00181	L2-7_00181	-0.817042	4.05157	5.30385	0.0212784	0.0428935
L2-7_01376	L2-7_01376	-0.816481	3.59642	11.1301	0.000849384	0.00247656
L2-7_02383	ybhF_3	-0.814732	6.72204	17.3658	3.08e-05	0.000124845
L2-7_02220	L2-7_02220	-0.814272	4.29852	14.9993	0.000107553	0.000390366
L2-7_00131	L2-7_00131	-0.811924	0.344088	4.93781	0.0262753	0.0514489
L2-7_02820	L2-7_02820	-0.811877	4.40918	26.0453	3.33e-07	1.91e-06
L2-7_01205	L2-7_01205	-0.811233	6.09794	0.922385	0.336849	0.42844
L2-7_01081	hypD	-0.807332	7.53193	9.13322	0.0025101	0.00651835
L2-7_01133	ydfG	-0.807049	4.56457	24.3917	7.86e-07	4.18e-06
L2-7_00302	L2-7_00302	-0.806517	6.62767	3.72492	0.0536062	0.0947066
L2-7_01551	rimO	-0.804218	8.76883	24.1646	8.84e-07	4.64e-06
L2-7_01764	xylB_1	-0.803852	2.90895	3.77191	0.0521202	0.0925966
L2-7_02346	L2-7_02346	-0.803587	5.12342	17.109	3.53e-05	0.000142298
L2-7_00328	swrC	-0.802666	7.37407	48.9744	2.59e-12	3.01e-11
L2-7_01667	yehU_2	-0.793925	5.96404	33.0319	9.07e-09	6.77e-08
L2-7_02448	L2-7_02448	-0.79326	1.41707	4.80162	0.028433	0.0550964
L2-7_02322	adhR	-0.792744	2.79492	11.6125	0.000655087	0.0019548
L2-7_02846	L2-7_02846	-0.79206	2.63281	9.26062	0.00234134	0.00615425
L2-7_01563	L2-7_01563	-0.788419	6.89257	23.691	1.13e-06	5.8e-06
L2-7_02104	L2-7_02104	-0.787269	1.19587	5.01838	0.0250797	0.0493839
L2-7_02823	L2-7_02823	-0.783657	0.750614	5.08595	0.0241204	0.0477973
L2-7_01520	L2-7_01520	-0.782501	3.30851	7.74703	0.00538009	0.0127323
L2-7_00440	ecfT_1	-0.782453	4.08793	21.0669	4.44e-06	2.09e-05
L2-7_02981	L2-7_02981	-0.779612	7.57664	17.6617	2.64e-05	0.000108578
L2-7_00027	sepF	-0.777829	7.86253	23.8902	1.02e-06	5.27e-06
L2-7_01540	L2-7_01540	-0.776316	0.567383	6.95396	0.00836337	0.0188833
L2-7_00534	ywlC	-0.775063	8.6491	28.1067	1.15e-07	7.2e-07
L2-7_00485	abrB	-0.77346	10.8155	12.6462	0.000376336	0.00119017
L2-7_01293	L2-7_01293	-0.772017	2.96225	8.68609	0.00320648	0.00806514
L2-7_00843	ktrB_2	-0.770063	6.84782	8.4557	0.00363901	0.00899956
L2-7_02805	L2-7_02805	-0.768397	2.45091	14.7812	0.000120734	0.000430404
L2-7_02221	L2-7_02221	-0.766929	5.90827	9.15404	0.0024817	0.00646176
L2-7_00495	L2-7_00495	-0.763603	4.46208	15.2287	9.52e-05	0.000350239
L2-7_02947	norM_2	-0.760443	3.06681	19.7249	8.94e-06	4.02e-05
L2-7_01821	yycF_1	-0.760298	7.06657	39.3011	3.63e-10	3.33e-09
L2-7_00496	vraR	-0.756381	4.39815	10.8569	0.000984301	0.00282873
L2-7_01592	fbp	-0.756325	8.25965	31.1493	2.39e-08	1.68e-07
L2-7_00457	L2-7_00457	-0.756093	5.69255	10.571	0.00114874	0.00326117
L2-7_00521	L2-7_00521	-0.755569	7.55872	26.0354	3.35e-07	1.91e-06
L2-7_01982	L2-7_01982	-0.755127	8.93202	12.3003	0.000452892	0.00140222
L2-7_01712	L2-7_01712	-0.755102	7.49368	20.8484	4.97e-06	2.32e-05
L2-7_00634	L2-7_00634	-0.752834	7.77954	21.8729	2.91e-06	1.41e-05
L2-7_00235	acrA_1	-0.747267	1.604	9.56171	0.00198678	0.00532214
L2-7_01755	hpt	-0.745075	6.53551	27.1716	1.86e-07	1.11e-06
L2-7_01629	L2-7_01629	-0.743108	4.71798	16.5341	4.78e-05	0.000185891
L2-7_01794	cobC	-0.736195	4.24154	12.1208	0.000498617	0.00152858
L2-7_02165	L2-7_02165	-0.735747	6.04904	14.0348	0.000179457	0.000619259
L2-7_02149	L2-7_02149	-0.733408	4.58513	24.5424	7.27e-07	3.9e-06
L2-7_02990	L2-7_02990	-0.733016	0.559321	4.50168	0.0338616	0.0643691
L2-7_00296	cdr_1	-0.731431	8.97478	3.09457	0.0785539	0.131233
L2-7_02629	cas2_2	-0.730434	0.348303	2.90552	0.0882766	0.14465
L2-7_02303	L2-7_02303	-0.72813	4.73496	11.0999	0.000863339	0.00250941
L2-7_00533	L2-7_00533	-0.725961	7.32951	30.0598	4.19e-08	2.79e-07
L2-7_01756	ftsH_2	-0.724572	8.9339	16.1274	5.92e-05	0.000225151
L2-7_02610	L2-7_02610	-0.723114	6.87642	28.5297	9.23e-08	5.86e-07
L2-7_00672	L2-7_00672	-0.722379	5.18946	20.2266	6.88e-06	3.13e-05
L2-7_02440	L2-7_02440	-0.722057	8.14662	19.0823	1.25e-05	5.47e-05
L2-7_02401	spoVD_2	-0.722007	6.55437	33.7632	6.22e-09	4.78e-08
L2-7_02975	rpfC_6	-0.720772	6.16569	34.7758	3.7e-09	2.91e-08
L2-7_02038	ndx1	-0.718253	6.36494	29.6009	5.31e-08	3.48e-07
L2-7_02406	ftsZ	-0.718157	9.97385	20.8312	5.02e-06	2.33e-05
L2-7_02076	L2-7_02076	-0.717886	7.11095	15.0174	0.000106525	0.000387138
L2-7_00846	kdpD	-0.717847	7.53957	15.6112	7.78e-05	0.000287938
L2-7_01032	thiC	-0.717279	3.65701	12.9314	0.00032312	0.00104307
L2-7_00030	L2-7_00030	-0.713682	6.74282	15.9137	6.63e-05	0.000249011
L2-7_01848	L2-7_01848	-0.713113	1.83792	6.77571	0.00924069	0.0205332
L2-7_01684	L2-7_01684	-0.71301	5.42147	15.1866	9.74e-05	0.000356726
L2-7_01539	csiR	-0.712424	4.9644	9.17419	0.00245452	0.0064037
L2-7_00531	L2-7_00531	-0.708272	6.94287	27.2423	1.79e-07	1.08e-06
L2-7_01524	L2-7_01524	-0.701927	3.32504	16.6303	4.54e-05	0.000177994
L2-7_01134	L2-7_01134	-0.701642	2.89439	12.8103	0.000344711	0.00110009
L2-7_02659	L2-7_02659	-0.699167	5.34725	20.4231	6.21e-06	2.85e-05
L2-7_01465	ydfH_3	-0.698616	4.73322	11.3819	0.000741644	0.00218822
L2-7_00331	L2-7_00331	-0.69762	6.16432	2.17504	0.140266	0.214066
L2-7_00239	L2-7_00239	-0.697278	3.56604	15.5546	8.02e-05	0.000295913
L2-7_00735	L2-7_00735	-0.697158	2.18993	9.22297	0.00238998	0.00625277
L2-7_01715	L2-7_01715	-0.695577	6.5321	18.1534	2.04e-05	8.58e-05
L2-7_00205	fabG_1	-0.695327	3.39721	13.6158	0.000224286	0.000756256
L2-7_02566	L2-7_02566	-0.694877	7.57658	21.2415	4.05e-06	1.92e-05
L2-7_02958	ftsH4	-0.694135	7.52022	12.6856	0.00036849	0.00116932
L2-7_01699	sspC2	-0.694027	6.99096	15.2064	9.64e-05	0.000353929
L2-7_02666	pepD_1	-0.692081	8.65072	19.0178	1.3e-05	5.65e-05
L2-7_02707	L2-7_02707	-0.688442	3.46416	8.34744	0.00386232	0.00945999
L2-7_01542	L2-7_01542	-0.688316	3.39898	8.47588	0.00359887	0.00893974
L2-7_01085	L2-7_01085	-0.688089	7.84357	4.55895	0.0327471	0.0625049
L2-7_02751	cobU	-0.687925	6.13257	27.1989	1.84e-07	1.09e-06
L2-7_00174	corC_2	-0.687589	5.39702	18.2695	1.92e-05	8.17e-05
L2-7_00124	L2-7_00124	-0.687272	6.01527	22.8732	1.73e-06	8.67e-06
L2-7_00179	L2-7_00179	-0.687263	3.00786	5.91916	0.0149771	0.0314115
L2-7_00182	L2-7_00182	-0.684231	3.9208	4.54573	0.033001	0.0629467
L2-7_02410	cinA	-0.683388	7.65957	24.041	9.43e-07	4.92e-06
L2-7_02752	L2-7_02752	-0.682531	6.62741	24.8975	6.05e-07	3.3e-06
L2-7_02340	L2-7_02340	-0.681452	4.2119	10.4483	0.00122764	0.0034606
L2-7_01668	yesS_1	-0.6806	5.96415	26.4746	2.67e-07	1.56e-06
L2-7_00974	L2-7_00974	-0.680361	3.38063	16.5321	4.78e-05	0.000185891
L2-7_03023	L2-7_03023	-0.680233	2.48903	8.41036	0.00373089	0.00920244
L2-7_02056	xylB_2	-0.679036	12.962	12.2815	0.000457474	0.00141483
L2-7_01170	L2-7_01170	-0.677978	6.76232	31.386	2.12e-08	1.49e-07
L2-7_02050	L2-7_02050	-0.674771	2.80247	9.55573	0.00199327	0.00533441
L2-7_00950	rbsB	-0.674617	2.18983	6.37076	0.0116016	0.0251998
L2-7_02667	tsaA	-0.671728	4.75912	24.6161	7e-07	3.77e-06
L2-7_01206	L2-7_01206	-0.669206	6.01061	0.636687	0.424913	0.519009
L2-7_02155	L2-7_02155	-0.668065	1.34	2.86444	0.0905572	0.14761
L2-7_01200	L2-7_01200	-0.664595	4.63572	3.40218	0.0651105	0.112201
L2-7_01796	L2-7_01796	-0.662505	3.22891	4.47149	0.034465	0.0654274
L2-7_01464	L2-7_01464	-0.659256	1.77732	2.46491	0.116414	0.183254
L2-7_00208	srlE	-0.656513	4.16368	14.7649	0.000121779	0.000433578
L2-7_01086	nifD_2	-0.654617	7.80714	4.40271	0.0358819	0.0677957
L2-7_00242	allC	-0.653889	4.05845	10.2225	0.0013874	0.00388361
L2-7_02847	L2-7_02847	-0.652471	6.27791	13.2539	0.000272008	0.000898781
L2-7_02309	deoR_3	-0.652096	6.2855	10.0815	0.00149762	0.00415479
L2-7_00638	phoP_1	-0.652093	7.36552	27.5228	1.55e-07	9.48e-07
L2-7_01849	L2-7_01849	-0.644233	1.26269	7.03027	0.00801433	0.018153
L2-7_00109	L2-7_00109	-0.643126	4.31378	19.2719	1.13e-05	5e-05
L2-7_02971	L2-7_02971	-0.643088	5.42583	22.183	2.48e-06	1.21e-05
L2-7_01751	ftsL	-0.6425	2.96757	7.65903	0.00564889	0.0132787
L2-7_01651	L2-7_01651	-0.642005	5.84045	6.66956	0.00980737	0.0216721
L2-7_01087	L2-7_01087	-0.641809	6.83545	10.7586	0.00103796	0.00297684
L2-7_01291	ydfH_2	-0.639449	8.14605	0.33079	0.565194	0.649157
L2-7_01385	alaS_1	-0.638745	10.6536	8.04153	0.0045717	0.011024
L2-7_01207	L2-7_01207	-0.638615	6.50673	0.612114	0.433993	0.528028
L2-7_02415	adrA_2	-0.637479	5.85534	3.48785	0.0618208	0.107125
L2-7_01323	cutC	-0.636694	5.21584	6.42159	0.0112741	0.0245456
L2-7_02704	xerD_2	-0.63612	6.56677	8.39743	0.00375753	0.00925998
L2-7_01983	L2-7_01983	-0.634751	7.18305	7.88433	0.00498649	0.0119318
L2-7_00207	srlA	-0.633371	2.51968	5.93448	0.0148475	0.031181
L2-7_02664	epr	-0.632139	8.62909	12.8169	0.000343497	0.00109747
L2-7_01678	adrA_1	-0.631324	6.39677	12.3568	0.000439372	0.00137096
L2-7_02301	L2-7_02301	-0.628237	7.41938	10.6099	0.00112485	0.00319984
L2-7_02885	selD	-0.626949	5.40505	18.48	1.72e-05	7.38e-05
L2-7_01208	mepA_5	-0.625859	4.95403	5.71059	0.0168629	0.0349481
L2-7_02848	L2-7_02848	-0.625096	3.58965	5.97216	0.0145335	0.0305956
L2-7_00870	L2-7_00870	-0.624759	0.076461	2.48746	0.114757	0.181155
L2-7_01138	L2-7_01138	-0.624503	3.54036	5.7238	0.0167365	0.0347375
L2-7_02462	L2-7_02462	-0.621674	4.33967	8.8401	0.00294684	0.00753379
L2-7_02169	L2-7_02169	-0.621313	3.19981	5.02051	0.0250488	0.0493577
L2-7_01137	afr	-0.620659	5.69526	5.74058	0.0165773	0.0344582
L2-7_02260	L2-7_02260	-0.619807	1.22005	7.43459	0.00639818	0.0148531
L2-7_00463	degU_1	-0.619796	2.67656	4.2002	0.0404193	0.0751926
L2-7_02187	L2-7_02187	-0.619169	2.23475	6.11387	0.0134125	0.0284711
L2-7_01917	manY	-0.618853	12.0183	2.80524	0.0939568	0.152354
L2-7_00120	L2-7_00120	-0.618386	8.22849	8.18242	0.00422984	0.0103061
L2-7_01538	kynB	-0.6171	4.61834	5.21139	0.0224393	0.0448147
L2-7_01967	L2-7_01967	-0.616345	4.38551	11.9072	0.000559184	0.00169387
L2-7_01550	folD	-0.615938	8.13885	16.4107	5.1e-05	0.000196551
L2-7_02222	L2-7_02222	-0.612575	4.98018	6.29198	0.0121285	0.0261015
L2-7_01944	L2-7_01944	-0.61047	5.91629	13.3147	0.000263338	0.000874256
L2-7_02223	L2-7_02223	-0.6076	4.87342	12.9828	0.000314359	0.00102304
L2-7_02753	yajL	-0.605759	5.39327	16.8461	4.05e-05	0.000160883
L2-7_01968	L2-7_01968	-0.6056	5.14059	12.462	0.000415306	0.00130751
L2-7_01494	L2-7_01494	-0.605205	8.43963	15.3317	9.02e-05	0.000332086
L2-7_00113	L2-7_00113	-0.603557	6.55448	16.9548	3.83e-05	0.000153013
L2-7_01730	L2-7_01730	-0.600634	4.85019	6.36289	0.0116532	0.0252922
L2-7_00218	L2-7_00218	-0.598975	7.01513	7.33262	0.00677142	0.0156289
L2-7_00312	L2-7_00312	-0.59769	3.57375	8.50388	0.0035439	0.00881883
L2-7_01327	pyrG	-0.596485	9.90982	6.23484	0.0125261	0.0268539
L2-7_01735	rffA	-0.595894	8.57041	14.6169	0.000131727	0.000465448
L2-7_01020	oppD	-0.594491	3.48418	6.62729	0.0100428	0.0220878
L2-7_00732	L2-7_00732	-0.594319	6.72023	11.3415	0.000757945	0.00223319
L2-7_01969	L2-7_01969	-0.594295	5.26745	11.7845	0.000597254	0.00180335
L2-7_02077	sigA_4	-0.594188	8.41061	7.84678	0.00509112	0.012143
L2-7_00873	L2-7_00873	-0.591857	3.44109	6.00863	0.0142361	0.0300599
L2-7_00317	ntcA_2	-0.590139	7.43951	3.51283	0.0608953	0.105783
L2-7_00441	ykoD_1	-0.588137	5.31022	12.9632	0.000317682	0.00103026
L2-7_03054	L2-7_03054	-0.586651	4.31339	12.9829	0.000314352	0.00102304
L2-7_02339	L2-7_02339	-0.586522	4.34359	12.2134	0.000474475	0.00146097
L2-7_00502	ykuL	-0.583931	7.05837	9.18703	0.00243737	0.0063708
L2-7_02178	cfiB_2	-0.583042	3.32916	8.66567	0.0032426	0.00814867
L2-7_01766	deoR_2	-0.582855	6.90075	16.1681	5.8e-05	0.000220966
L2-7_00536	mecB	-0.581686	7.32704	12.2421	0.00046724	0.00144186
L2-7_00152	cgkA_1	-0.58156	9.4576	11.9174	0.000556111	0.00168822
L2-7_02299	ttcA_1	-0.579536	4.1668	14.8349	0.000117345	0.000421
L2-7_02507	cymR_2	-0.578811	7.48745	22.4235	2.19e-06	1.08e-05
L2-7_02795	L2-7_02795	-0.578668	5.96841	17.5021	2.87e-05	0.000117566
L2-7_00420	L2-7_00420	-0.578662	0.183469	2.70425	0.100081	0.161444
L2-7_00359	era	-0.577267	7.07494	18.2075	1.98e-05	8.4e-05
L2-7_02297	yneA	-0.576104	2.33222	4.47462	0.0344018	0.0653518
L2-7_01763	L2-7_01763	-0.575582	6.48991	2.61084	0.106136	0.169939
L2-7_02572	L2-7_02572	-0.575037	9.15052	8.0468	0.00455842	0.0110015
L2-7_01042	xdhA	-0.574232	8.98247	11.9077	0.000559025	0.00169387
L2-7_02832	L2-7_02832	-0.572737	4.51911	12.9507	0.000319805	0.00103475
L2-7_00056	trmK	-0.569639	3.92338	12.6523	0.000375113	0.00118765
L2-7_02665	dus_2	-0.569569	8.13552	16.7615	4.24e-05	0.000167076
L2-7_00889	L2-7_00889	-0.568811	0.353063	1.32791	0.249177	0.336154
L2-7_02906	L2-7_02906	-0.568734	1.75308	6.98914	0.00820058	0.0185456
L2-7_02703	L2-7_02703	-0.565927	3.64574	6.18431	0.0128888	0.0275053
L2-7_00033	mgsA	-0.56373	6.47611	23.8946	1.02e-06	5.27e-06
L2-7_02903	L2-7_02903	-0.563495	2.02312	0.642425	0.422834	0.51692
L2-7_00227	ycdZ	-0.559361	6.22583	10.9054	0.000958861	0.00276413
L2-7_00130	yraA	-0.556907	0.56352	3.62808	0.0568122	0.0996792
L2-7_00888	L2-7_00888	-0.556282	1.92642	6.79931	0.00911929	0.0203441
L2-7_01946	corA	-0.555831	7.62209	6.91994	0.00852398	0.0191533
L2-7_01510	gloB	-0.554234	3.72326	6.41036	0.0113456	0.024682
L2-7_02130	metH_2	-0.553733	7.04775	11.4494	0.000715184	0.00211387
L2-7_02262	cysE_1	-0.553516	7.70959	12.999	0.000311651	0.00101896
L2-7_02314	macB_3	-0.552913	0.681005	1.52775	0.21645	0.302641
L2-7_01970	L2-7_01970	-0.551688	7.17213	10.3086	0.00132408	0.00371751
L2-7_01569	L2-7_01569	-0.551642	2.78131	6.15365	0.0131141	0.0279222
L2-7_02382	L2-7_02382	-0.549953	6.4463	6.30929	0.0120107	0.0259076
L2-7_02411	sstT	-0.549077	8.78695	14.9954	0.000107776	0.000390372
L2-7_01554	ytrA_1	-0.548383	5.26969	16.7447	4.28e-05	0.00016828
L2-7_02090	L2-7_02090	-0.548129	3.23461	3.17437	0.074802	0.126186
L2-7_01734	arnC	-0.547455	8.88225	11.3812	0.000741903	0.00218822
L2-7_00898	L2-7_00898	-0.546695	0.243974	1.95451	0.162102	0.239435
L2-7_00238	preA	-0.546637	3.38244	6.24961	0.012422	0.0266717
L2-7_01523	L2-7_01523	-0.545165	0.91338	2.22194	0.136062	0.208617
L2-7_02112	L2-7_02112	-0.544663	5.89612	8.11715	0.00438483	0.0106559
L2-7_01918	manZ	-0.544344	12.0758	2.01518	0.155733	0.231862
L2-7_00203	L2-7_00203	-0.543527	5.2748	14.0574	0.000177316	0.000613383
L2-7_01854	L2-7_01854	-0.53972	1.66136	1.97253	0.16018	0.237255
L2-7_02543	trpB_2	-0.539027	7.13563	3.78326	0.0517677	0.0920971
L2-7_00422	L2-7_00422	-0.536304	3.48258	4.19863	0.0404566	0.0751926
L2-7_01433	L2-7_01433	-0.535872	5.41614	5.96322	0.0146073	0.030728
L2-7_00648	csd	-0.535631	5.91266	2.32961	0.126934	0.197593
L2-7_00358	L2-7_00358	-0.53555	8.02477	18.0285	2.18e-05	9.07e-05
L2-7_00112	L2-7_00112	-0.535262	5.31551	9.52189	0.00203035	0.0054233
L2-7_00234	acrB_1	-0.534289	0.438534	2.16768	0.140938	0.214858
L2-7_03006	iap_2	-0.533033	2.21103	1.04194	0.307371	0.397808
L2-7_02055	L2-7_02055	-0.53103	6.08826	13.3728	0.000255305	0.000852639
L2-7_02541	L2-7_02541	-0.529439	4.45507	10.2175	0.00139115	0.00388635
L2-7_01521	L2-7_01521	-0.529253	2.90977	3.64196	0.0563405	0.0989743
L2-7_02904	L2-7_02904	-0.528867	2.01177	4.08187	0.0433457	0.0797469
L2-7_02156	L2-7_02156	-0.528529	4.00238	4.0629	0.0438351	0.0805416
L2-7_01294	L2-7_01294	-0.528396	2.7875	3.3563	0.0669483	0.114677
L2-7_00872	ssb_2	-0.528217	1.53429	5.59943	0.0179664	0.0370432
L2-7_02833	L2-7_02833	-0.528151	2.73892	4.95531	0.0260106	0.0510019
L2-7_02045	L2-7_02045	-0.527308	4.46366	8.55339	0.00344878	0.00861274
L2-7_00430	mbtB_1	-0.526585	2.22776	3.29193	0.0696211	0.118647
L2-7_00204	aroL	-0.526062	4.44563	8.81971	0.00297993	0.00761146
L2-7_01382	L2-7_01382	-0.525691	7.59574	9.23277	0.00237722	0.00623103
L2-7_01945	L2-7_01945	-0.524126	6.32582	8.88237	0.00287938	0.00739506
L2-7_01305	L2-7_01305	-0.524022	7.01565	15.1938	9.7e-05	0.000355834
L2-7_00387	L2-7_00387	-0.523391	2.53144	1.9831	0.159064	0.236069
L2-7_00216	L2-7_00216	-0.523236	5.18061	12.6608	0.000373409	0.00118359
L2-7_02620	L2-7_02620	-0.522967	3.89554	2.65224	0.103404	0.165944
L2-7_00243	mepA_2	-0.521741	4.09877	9.6855	0.00185728	0.00503297
L2-7_00646	fhs	-0.519633	10.5492	8.4698	0.00361091	0.00895378
L2-7_01393	L2-7_01393	-0.518967	5.91442	14.9585	0.000109901	0.000397346
L2-7_00733	mta_1	-0.518771	4.26138	7.23483	0.00715026	0.0164122
L2-7_00494	L2-7_00494	-0.518687	4.5537	4.39221	0.0361035	0.0681225
L2-7_01916	manX	-0.518205	12.3347	2.33267	0.126685	0.197399
L2-7_00119	corC_1	-0.517585	8.12134	7.68022	0.00558292	0.0131522
L2-7_01217	ispE	-0.517351	7.38882	8.58299	0.00339318	0.00849136
L2-7_00055	hisK_1	-0.516506	5.10535	15.8437	6.88e-05	0.000257253
L2-7_00992	L2-7_00992	-0.515868	1.69726	2.35461	0.124913	0.195098
L2-7_02699	L2-7_02699	-0.515173	4.23597	11.2457	0.000798092	0.00233673
L2-7_01993	infA	-0.514714	7.44208	8.24863	0.00407827	0.00996279
L2-7_02767	L2-7_02767	-0.512967	8.151	14.8118	0.000118791	0.000425641
L2-7_00251	L2-7_00251	-0.512861	1.32155	1.85886	0.172757	0.251986
L2-7_01378	dhaL	-0.511848	9.64842	7.41475	0.00646912	0.0149682
L2-7_01178	tagB_4	-0.51044	7.80056	9.96759	0.0015932	0.0043852
L2-7_02023	L2-7_02023	-0.509579	8.44551	4.5918	0.0321252	0.0615398
L2-7_00673	L2-7_00673	-0.508202	4.52173	12.4226	0.000424177	0.00133096
L2-7_00115	sigA_2	-0.505679	6.73099	6.67045	0.00980244	0.0216721
L2-7_02271	L2-7_02271	-0.504869	7.83528	14.8354	0.000117313	0.000421
L2-7_00981	rps1	-0.504689	12.8473	6.66754	0.00981846	0.0216795
L2-7_00001	L2-7_00001	-0.504385	5.4437	9.17514	0.00245325	0.0064037
L2-7_00998	tadA_2	-0.50429	7.85283	7.09613	0.00772504	0.0175552
L2-7_00819	L2-7_00819	-0.500983	7.02235	7.69383	0.00554099	0.0130689
L2-7_02989	L2-7_02989	-0.498862	1.62953	4.01638	0.0450602	0.0824682
L2-7_02738	L2-7_02738	-0.498442	3.12698	6.57703	0.0103303	0.0226846
L2-7_02237	L2-7_02237	-0.498327	6.2477	3.70707	0.0541825	0.0956041
L2-7_01481	cmpR_2	-0.494179	3.39408	6.78037	0.00921658	0.0204959
L2-7_01522	L2-7_01522	-0.493709	3.76538	6.87211	0.00875514	0.0195785
L2-7_01666	L2-7_01666	-0.493595	4.75362	9.01239	0.00268156	0.00692509
L2-7_01555	clpC	-0.492656	8.31561	9.61247	0.0019326	0.00521692
L2-7_02656	cas2_3	-0.49159	0.147349	1.71357	0.190523	0.272788
L2-7_03009	L2-7_03009	-0.491421	4.09477	8.07946	0.00447699	0.0108329
L2-7_00026	aroB	-0.490743	6.20708	11.2812	0.00078296	0.00229964
L2-7_01043	hcrC	-0.490031	6.11165	10.0011	0.00156446	0.00431458
L2-7_01377	dhaM	-0.489756	8.26559	6.3323	0.0118559	0.0256526
L2-7_01568	sigW_1	-0.489528	3.02066	4.02682	0.0447824	0.0821642
L2-7_00982	cmk	-0.489122	11.1869	4.53574	0.0331942	0.0632722
L2-7_02228	L2-7_02228	-0.486668	1.87098	2.57912	0.108282	0.172292
L2-7_00436	L2-7_00436	-0.485569	1.71575	4.67332	0.0306347	0.0589253
L2-7_02590	rmlA1_2	-0.484718	5.24652	3.33975	0.0676247	0.11561
L2-7_01466	L2-7_01466	-0.483444	3.74596	6.10767	0.0134596	0.0285495
L2-7_02657	ppdK	-0.483302	12.023	5.33486	0.020903	0.0422279
L2-7_00031	L2-7_00031	-0.480682	8.73225	4.12844	0.0421681	0.0778361
L2-7_00644	L2-7_00644	-0.480591	6.66845	10.9349	0.000943697	0.00272321
L2-7_01405	dinB_4	-0.480065	4.53624	9.64835	0.00189521	0.00512586
L2-7_00684	glgB_1	-0.480014	8.59899	7.0289	0.00802047	0.018153
L2-7_02025	L2-7_02025	-0.479752	7.61195	10.3374	0.00130363	0.00367113
L2-7_02729	tee6	-0.47913	4.69509	6.32854	0.011881	0.0256872
L2-7_01532	dacA	-0.475429	7.02398	9.06523	0.00260515	0.00674643
L2-7_01511	ttuE	-0.475222	6.03433	12.0007	0.0005318	0.00161968
L2-7_02939	ylbJ	-0.475215	7.26534	18.1554	2.04e-05	8.58e-05
L2-7_02540	L2-7_02540	-0.474012	3.79111	8.93214	0.00280196	0.00720946
L2-7_02272	L2-7_02272	-0.47185	6.62315	12.3163	0.000449024	0.00139641
L2-7_00979	L2-7_00979	-0.471488	7.42129	1.92853	0.16492	0.242575
L2-7_00434	mbtB_3	-0.470069	2.08287	3.51328	0.0608787	0.105783
L2-7_00547	L2-7_00547	-0.468596	5.46741	2.51382	0.112852	0.17865
L2-7_01673	L2-7_01673	-0.468063	5.62419	7.85466	0.00506899	0.0121085
L2-7_01655	phoR_1	-0.467799	1.58243	5.00761	0.0252361	0.0495873
L2-7_00847	kdpE	-0.466649	6.15891	6.05109	0.0138977	0.0294119
L2-7_01495	arcC1	-0.464841	8.35905	10.044	0.00152841	0.00422766
L2-7_01559	luxQ_1	-0.463493	5.71905	2.15184	0.142399	0.216731
L2-7_01260	L2-7_01260	-0.462105	4.48792	5.6317	0.0176385	0.0364208
L2-7_00600	exoA	-0.462008	5.95868	12.4522	0.000417495	0.00131293
L2-7_02074	L2-7_02074	-0.45924	6.67529	14.559	0.000135837	0.00047876
L2-7_00401	opuCA	-0.459116	5.19196	7.58113	0.00589826	0.0137839
L2-7_00790	nasF	-0.455344	8.23157	5.4131	0.0199862	0.04061
L2-7_00515	L2-7_00515	-0.45516	7.27916	8.75383	0.00308952	0.00783424
L2-7_00024	rluD_1	-0.453588	6.50824	9.32652	0.00225861	0.00594236
L2-7_01384	def_2	-0.453068	4.98925	8.08958	0.00445205	0.0107912
L2-7_00590	L2-7_00590	-0.451458	4.60688	4.9832	0.0255946	0.0502212
L2-7_02132	yesS_2	-0.45093	7.36179	10.0416	0.00153045	0.00422912
L2-7_00111	L2-7_00111	-0.450908	5.38596	6.12693	0.0133138	0.0282829
L2-7_01237	L2-7_01237	-0.448634	2.06885	3.37441	0.0662162	0.113827
L2-7_00175	ktrB_1	-0.447237	6.02777	9.39341	0.00217766	0.00575643
L2-7_02717	bioY2	-0.446466	5.74656	2.22419	0.135864	0.208483
L2-7_02768	L2-7_02768	-0.445457	7.74158	9.72568	0.00181711	0.00493692
L2-7_01765	gpsA_1	-0.444587	1.52062	1.03296	0.309466	0.399596
L2-7_02905	L2-7_02905	-0.443635	2.06872	3.46863	0.0625429	0.10831
L2-7_02398	rsmH_2	-0.442952	6.70744	13.7328	0.000210741	0.000715753
L2-7_00400	opuCD	-0.442893	4.8234	6.61644	0.0101042	0.0222054
L2-7_01787	rimM	-0.441859	6.24504	7.6446	0.00569426	0.0133629
L2-7_00360	recO	-0.441418	6.21245	9.7167	0.00182601	0.00495304
L2-7_00791	cobS	-0.43832	6.85636	6.29888	0.0120814	0.0260201
L2-7_01033	thiD_1	-0.438293	2.32739	4.46037	0.03469	0.06581
L2-7_01901	L2-7_01901	-0.43829	9.15921	7.62576	0.00575403	0.0134693
L2-7_00226	rsmH_1	-0.438066	7.09719	5.57438	0.0182252	0.0374665
L2-7_02962	cfiA	-0.437698	2.49838	5.90482	0.0150995	0.031621
L2-7_00349	L2-7_00349	-0.437185	4.44038	5.78997	0.0161178	0.0336227
L2-7_00032	dacF_1	-0.435902	8.08565	10.5118	0.00118618	0.00335724
L2-7_00902	L2-7_00902	-0.435735	0.0651795	1.2384	0.265779	0.354119
L2-7_02408	sigE	-0.434828	0.280349	1.87243	0.171196	0.25044
L2-7_01902	L2-7_01902	-0.434708	8.35338	7.23298	0.00715764	0.0164122
L2-7_00110	L2-7_00110	-0.431894	4.2408	5.55093	0.0184709	0.0379161
L2-7_01199	L2-7_01199	-0.430747	4.69124	1.39678	0.237263	0.323529
L2-7_02351	L2-7_02351	-0.430096	0.81123	2.02371	0.154861	0.231023
L2-7_00628	L2-7_00628	-0.429975	5.88015	9.88378	0.00166742	0.00456707
L2-7_00789	cbiH	-0.429738	6.24776	5.34704	0.0207575	0.0419946
L2-7_00425	L2-7_00425	-0.429259	0.126629	1.42971	0.231812	0.317777
L2-7_02154	yoeB	-0.429173	2.50622	3.09382	0.0785901	0.131233
L2-7_01852	L2-7_01852	-0.428538	0.848323	2.04208	0.153001	0.229256
L2-7_01333	L2-7_01333	-0.428259	7.27527	4.12345	0.0422927	0.0780146
L2-7_02518	L2-7_02518	-0.427809	5.72934	8.49548	0.00356029	0.00885177
L2-7_02940	L2-7_02940	-0.427409	6.36197	13.9155	0.000191215	0.000656108
L2-7_00676	L2-7_00676	-0.426652	2.19378	3.44498	0.0634443	0.109735
L2-7_02486	L2-7_02486	-0.426179	4.65557	4.13533	0.041997	0.0775712
L2-7_00589	L2-7_00589	-0.425647	7.31639	7.03142	0.00800918	0.018153
L2-7_01564	L2-7_01564	-0.425369	4.34897	1.95691	0.161844	0.239307
L2-7_02959	pdg	-0.420506	5.47442	3.89017	0.0485694	0.0872941
L2-7_02835	gabR	-0.420219	5.01289	4.917	0.0265937	0.0518911
L2-7_02565	L2-7_02565	-0.418729	6.60129	6.78079	0.00921439	0.0204959
L2-7_02724	luxQ_3	-0.417698	6.45068	7.18961	0.00733271	0.0167862
L2-7_01480	L2-7_01480	-0.417499	3.56185	3.05693	0.0803935	0.133766
L2-7_01533	L2-7_01533	-0.414577	2.87019	1.3678	0.24219	0.328787
L2-7_00472	yfkJ	-0.413946	5.09947	7.67933	0.0055857	0.0131522
L2-7_01942	L2-7_01942	-0.413373	6.03221	6.53759	0.0105618	0.0231205
L2-7_00599	mccF	-0.411826	6.52069	9.11118	0.00254052	0.00659124
L2-7_02552	mrcA	-0.410685	10.0579	4.99571	0.0254103	0.0498946
L2-7_00731	drrA_2	-0.410433	7.05455	2.23272	0.135115	0.207676
L2-7_00313	L2-7_00313	-0.407966	5.99129	5.2544	0.0218914	0.0438767
L2-7_02501	L2-7_02501	-0.406133	2.97643	1.59906	0.206037	0.290546
L2-7_00477	L2-7_00477	-0.40437	4.46086	8.54703	0.00346087	0.00862754
L2-7_02655	cas1_3	-0.403879	2.36228	3.99527	0.045628	0.083344
L2-7_02706	xerC_2	-0.403833	2.12843	2.72219	0.098962	0.15973
L2-7_00473	L2-7_00473	-0.403795	6.28843	7.80439	0.00521194	0.0123761
L2-7_02923	ung	-0.402297	6.10933	8.77085	0.00306083	0.0077897
L2-7_02302	L2-7_02302	-0.401324	6.85111	3.96982	0.0463229	0.0840204
L2-7_00443	L2-7_00443	-0.400492	4.56023	3.523	0.0605229	0.105267
L2-7_01019	oppF	-0.399824	3.32932	3.33985	0.0676208	0.11561
L2-7_01875	infB	-0.399062	8.73872	4.90758	0.026739	0.0520858
L2-7_02341	L2-7_02341	-0.396141	3.48702	2.853	0.0912034	0.148404
L2-7_01041	mobA_2	-0.39445	6.75875	7.09791	0.00771739	0.0175552
L2-7_01053	L2-7_01053	-0.393338	7.443	8.21154	0.00416247	0.0101596
L2-7_02784	L2-7_02784	-0.393226	4.0813	2.96945	0.0848505	0.140018
L2-7_02553	gloA	-0.39232	6.91388	6.70238	0.00962845	0.0213272
L2-7_01824	L2-7_01824	-0.391346	6.36442	12.0299	0.000523553	0.00159629
L2-7_01065	pyrH	-0.389576	7.92197	9.24652	0.00235943	0.006196
L2-7_00548	L2-7_00548	-0.388065	5.82703	1.88226	0.170077	0.249245
L2-7_00034	mrdB	-0.386679	7.65321	7.22056	0.0072073	0.0165126
L2-7_02991	L2-7_02991	-0.385756	0.908423	1.92302	0.165524	0.243209
L2-7_01062	cdsA	-0.381748	6.34187	5.78893	0.0161274	0.0336227
L2-7_00237	preT	-0.38122	3.41412	2.1591	0.141727	0.215941
L2-7_02539	L2-7_02539	-0.380804	2.09703	3.06999	0.0797499	0.132853
L2-7_02414	L2-7_02414	-0.379882	4.74242	0.883133	0.347345	0.438999
L2-7_02574	L2-7_02574	-0.379095	1.37371	1.53349	0.215589	0.301739
L2-7_02042	L2-7_02042	-0.378662	4.68477	6.05567	0.0138617	0.0293579
L2-7_00458	albA	-0.377884	2.84254	2.39656	0.121603	0.190459
L2-7_00462	L2-7_00462	-0.376017	3.09053	1.76226	0.184343	0.265431
L2-7_00385	nrdR	-0.375958	5.30239	1.81233	0.178229	0.258593
L2-7_00913	soxS_1	-0.374657	4.91467	2.87466	0.0899838	0.14676
L2-7_01874	rbfA	-0.373749	6.43993	4.37894	0.0363857	0.0685166
L2-7_02692	relA_2	-0.372181	9.35632	3.77336	0.052075	0.0925851
L2-7_02109	L2-7_02109	-0.372106	2.70013	2.7547	0.096969	0.156603
L2-7_02466	L2-7_02466	-0.371319	3.87948	5.14754	0.0232793	0.0463272
L2-7_01058	addB	-0.371075	6.83536	4.16175	0.0413467	0.0766734
L2-7_01562	glmU_2	-0.36985	6.08772	6.24517	0.0124533	0.0267183
L2-7_01368	yvdT	-0.369821	5.02979	0.701981	0.402119	0.495793
L2-7_00857	livH	-0.367276	7.5272	1.00129	0.317	0.407446
L2-7_01142	mntR_2	-0.366402	7.50243	6.55521	0.0104577	0.0229285
L2-7_02512	L2-7_02512	-0.366065	4.36103	4.87877	0.027189	0.0528685
L2-7_01855	immR	-0.365853	3.65359	0.932681	0.334167	0.425904
L2-7_00869	L2-7_00869	-0.365431	2.25528	2.07067	0.150156	0.226081
L2-7_01695	mgtE	-0.365426	6.03646	5.57451	0.0182237	0.0374665
L2-7_02121	L2-7_02121	-0.363786	7.45574	5.17134	0.0229625	0.0457943
L2-7_00951	L2-7_00951	-0.362042	5.64201	1.302	0.253849	0.34098
L2-7_01009	L2-7_01009	-0.3616	6.54758	8.33147	0.00389642	0.00953516
L2-7_02467	L2-7_02467	-0.361352	4.95948	6.25488	0.0123852	0.0266333
L2-7_00107	L2-7_00107	-0.360205	10.4213	3.31938	0.0684676	0.116837
L2-7_00035	minE	-0.359877	5.78061	8.09024	0.00445043	0.0107912
L2-7_00342	L2-7_00342	-0.359747	4.93687	5.7028	0.0169378	0.0350775
L2-7_01487	ptsH_2	-0.359553	2.90884	3.9857	0.0458881	0.0837644
L2-7_01218	ydfH_1	-0.358946	7.26496	4.21191	0.0401411	0.0747842
L2-7_00323	L2-7_00323	-0.3587	6.80696	1.99609	0.157706	0.234301
L2-7_02399	L2-7_02399	-0.358635	5.14244	7.72521	0.00544551	0.0128545
L2-7_00627	L2-7_00627	-0.357786	3.20003	3.8194	0.0506623	0.0904177
L2-7_01040	xpt	-0.357521	5.38201	2.84664	0.091565	0.148906
L2-7_01971	dnaJ_2	-0.355895	5.75086	1.50202	0.220361	0.306884
L2-7_02026	L2-7_02026	-0.355661	4.57986	2.95555	0.085583	0.141061
L2-7_01049	queF	-0.354708	6.15806	6.18047	0.0129168	0.0275441
L2-7_01152	xseA	-0.354077	7.98946	6.44679	0.0111153	0.0242563
L2-7_03021	L2-7_03021	-0.353279	2.26115	1.03527	0.308924	0.399264
L2-7_00911	Int-Tn_2	-0.353139	4.93169	1.48643	0.222771	0.309472
L2-7_02274	L2-7_02274	-0.352684	3.24619	1.30643	0.253042	0.340223
L2-7_00121	L2-7_00121	-0.35197	5.42587	5.4402	0.0196785	0.0401303
L2-7_02439	L2-7_02439	-0.351705	6.48345	3.75981	0.0524987	0.093102
L2-7_01786	trmD	-0.35164	6.91335	5.82582	0.0157926	0.0329984
L2-7_01167	rnc	-0.351421	4.6674	3.69625	0.0545348	0.0961652
L2-7_02188	sinR	-0.350645	2.06314	2.24466	0.134077	0.206533
L2-7_03062	L2-7_03062	-0.346338	1.02827	0.333853	0.563399	0.648048
L2-7_00629	gmr_1	-0.346002	6.4408	6.6288	0.0100343	0.0220865
L2-7_02625	L2-7_02625	-0.344451	4.44711	1.33819	0.247353	0.334338
L2-7_01806	sgcG_1	-0.343715	5.32906	6.14887	0.0131496	0.0279553
L2-7_01733	bacD	-0.342231	8.61679	3.97883	0.0460756	0.0839502
L2-7_02886	cysL	-0.341593	4.27239	5.74282	0.0165561	0.0344397
L2-7_01611	arlS_2	-0.340063	5.86605	5.21482	0.0223952	0.0447585
L2-7_01448	L2-7_01448	-0.339175	-0.0655857	0.357242	0.550042	0.636603
L2-7_02615	znuB	-0.337337	5.74345	1.87081	0.171382	0.25044
L2-7_01094	L2-7_01094	-0.337282	6.21747	4.56335	0.0326632	0.0623873
L2-7_00736	L2-7_00736	-0.33474	2.71718	3.37061	0.0663691	0.11402
L2-7_02670	L2-7_02670	-0.333831	7.51191	5.79865	0.0160385	0.0334872
L2-7_02602	L2-7_02602	-0.333804	1.66775	2.04433	0.152775	0.229039
L2-7_01064	frr	-0.33364	7.97298	4.36114	0.0367676	0.0691429
L2-7_01139	fprA	-0.333384	9.12859	3.81275	0.0508638	0.0906618
L2-7_02298	xerC_1	-0.333198	5.59872	6.33625	0.0118295	0.0256153
L2-7_01800	L2-7_01800	-0.33268	5.65285	1.77836	0.182351	0.26324
L2-7_02766	pcrA	-0.332573	7.85453	5.54937	0.0184874	0.0379221
L2-7_01362	rplGA	-0.332053	6.34831	3.87339	0.0490572	0.087889
L2-7_00671	topB_1	-0.329319	6.33942	3.96957	0.0463296	0.0840204
L2-7_02496	L2-7_02496	-0.328336	4.72812	2.46788	0.116194	0.183011
L2-7_02723	fliY	-0.327627	4.95592	4.69974	0.0301671	0.058175
L2-7_01956	L2-7_01956	-0.327468	6.35598	1.92932	0.164833	0.242575
L2-7_00704	phnW	-0.323161	0.587117	0.925021	0.33616	0.427757
L2-7_01352	L2-7_01352	-0.322384	8.67637	3.83364	0.0502336	0.089767
L2-7_02029	L2-7_02029	-0.322315	7.36067	5.06577	0.0244029	0.0482547
L2-7_01057	addA	-0.32173	6.6657	3.64916	0.0560976	0.0986107
L2-7_01386	L2-7_01386	-0.320408	6.51307	4.90692	0.0267493	0.0520858
L2-7_00123	L2-7_00123	-0.320117	7.48401	5.66946	0.0172628	0.035724
L2-7_01725	saeR	-0.31935	5.06746	6.18527	0.0128818	0.0275053
L2-7_01363	L2-7_01363	-0.318068	5.83804	3.34232	0.0675195	0.115571
L2-7_02519	L2-7_02519	-0.318062	5.64504	3.54809	0.0596142	0.103945
L2-7_00108	L2-7_00108	-0.317914	5.49189	2.06284	0.150929	0.226879
L2-7_01992	L2-7_01992	-0.317577	6.74811	3.13222	0.076759	0.128501
L2-7_02591	rffG	-0.316927	6.17747	1.36195	0.2432	0.329838
L2-7_00588	yvdD	-0.316839	7.47661	2.20537	0.137531	0.21035
L2-7_01602	pgi	-0.316663	11.4684	1.8704	0.171429	0.25044
L2-7_00459	drrA_1	-0.315861	1.61482	0.96131	0.326857	0.41858
L2-7_02763	dacF_3	-0.315377	3.72757	1.38801	0.238742	0.32505
L2-7_02708	L2-7_02708	-0.315274	2.56079	2.13122	0.144326	0.219069
L2-7_01627	mepA_9	-0.314854	6.46422	6.79762	0.00912793	0.0203472
L2-7_02287	dnaA	-0.314327	7.72658	1.89406	0.168744	0.24755
L2-7_01066	L2-7_01066	-0.313822	4.78537	2.34511	0.125677	0.196182
L2-7_02887	graR	-0.313773	3.98114	2.90228	0.0884542	0.144803
L2-7_00414	tenI	-0.31245	3.33704	3.28622	0.0698638	0.11893
L2-7_01716	barA_1	-0.312256	6.22443	3.52935	0.0602915	0.104995
L2-7_00348	pduV_2	-0.311581	5.7163	4.60837	0.0318164	0.0610194
L2-7_02780	L2-7_02780	-0.311209	3.93608	3.59768	0.0578603	0.101265
L2-7_02240	L2-7_02240	-0.311064	1.61172	1.50592	0.219763	0.306508
L2-7_01615	nadD	-0.311011	6.27038	2.05568	0.151639	0.227581
L2-7_00416	L2-7_00416	-0.310624	0.784862	0.696829	0.403851	0.497184
L2-7_00788	hemA	-0.310101	7.48081	3.13199	0.0767701	0.128501
L2-7_02592	rmlD	-0.309434	6.54727	1.22543	0.268297	0.356916
L2-7_01044	kdhA	-0.305884	6.84717	4.0764	0.0434862	0.079953
L2-7_02621	L2-7_02621	-0.303374	1.96796	0.642563	0.422784	0.51692
L2-7_02988	spo0C_6	-0.302006	0.181675	0.545299	0.460245	0.553242
L2-7_01508	cadA	-0.301742	7.28007	3.41705	0.0645262	0.111332
L2-7_00820	L2-7_00820	-0.301603	7.15949	1.6553	0.198239	0.282393
L2-7_02098	L2-7_02098	-0.301049	2.26038	2.03775	0.153437	0.229296
L2-7_00215	gltD_1	-0.300235	9.75626	2.59169	0.107426	0.171319
L2-7_00038	pbpA_1	-0.299514	8.92192	3.98271	0.0459695	0.0838584
L2-7_01943	L2-7_01943	-0.298706	6.89137	3.11224	0.0777062	0.12999
L2-7_00438	pchR	-0.29781	6.56117	4.68396	0.0304456	0.0586716
L2-7_01236	L2-7_01236	-0.297654	0.884794	0.939349	0.332445	0.424379
L2-7_00787	cbiF	-0.296339	6.75941	3.43405	0.0638654	0.110376
L2-7_02776	crcB	-0.296337	5.24521	1.28818	0.256383	0.343561
L2-7_00136	yehU_1	-0.296274	4.31582	2.87904	0.0897397	0.146533
L2-7_00176	ktrA_1	-0.295174	5.02588	4.2684	0.0388275	0.0725782
L2-7_02663	L2-7_02663	-0.29444	7.53006	3.94418	0.0470338	0.0849702
L2-7_00848	L2-7_00848	-0.294028	6.20586	3.31786	0.0685308	0.116874
L2-7_02941	coaD	-0.293414	5.3958	6.17679	0.0129437	0.0275804
L2-7_01506	ppx	-0.290752	5.81527	4.51239	0.0336503	0.0640544
L2-7_00195	L2-7_00195	-0.290105	4.28162	4.31531	0.0377709	0.0708395
L2-7_01856	L2-7_01856	-0.287071	3.57199	0.579	0.446705	0.540676
L2-7_01609	yccM_2	-0.285076	2.95431	0.930826	0.334648	0.42622
L2-7_00956	hprK	-0.284138	8.83654	3.97434	0.0461985	0.0840204
L2-7_02333	galE	-0.2834	7.06525	3.5534	0.0594235	0.103741
L2-7_01698	gph_2	-0.283396	6.62841	3.22537	0.0725053	0.122904
L2-7_01919	L2-7_01919	-0.283088	8.26756	0.789058	0.374385	0.468316
L2-7_00442	L2-7_00442	-0.282057	4.21662	2.01982	0.155257	0.231399
L2-7_01497	L2-7_01497	-0.281973	5.38847	3.78445	0.051731	0.0920904
L2-7_01364	L2-7_01364	-0.280134	8.11283	3.21505	0.0729641	0.123383
L2-7_01427	L2-7_01427	-0.279	6.16928	3.55412	0.0593978	0.103741
L2-7_02912	L2-7_02912	-0.278773	6.78631	1.47612	0.224382	0.310786
L2-7_01422	L2-7_01422	-0.278634	6.79726	4.14026	0.0418746	0.0774888
L2-7_01950	moaC	-0.27836	3.41122	1.93481	0.164233	0.241946
L2-7_01238	L2-7_01238	-0.278269	0.386447	0.545723	0.46007	0.553242
L2-7_01847	L2-7_01847	-0.277927	1.93656	0.763097	0.382361	0.475744
L2-7_01306	rlmK	-0.277415	7.10013	3.97099	0.0462905	0.0840204
L2-7_00039	L2-7_00039	-0.277256	5.56464	2.86147	0.0907245	0.147711
L2-7_02517	L2-7_02517	-0.276564	6.39063	4.76003	0.029128	0.0563263
L2-7_01616	yhbY	-0.273897	4.29257	1.7849	0.181549	0.262488
L2-7_00645	L2-7_00645	-0.272907	6.45058	2.93214	0.0868324	0.142752
L2-7_02927	L2-7_02927	-0.272829	2.67991	0.545925	0.459988	0.553242
L2-7_00961	adhE_1	-0.272784	7.82311	2.60093	0.106801	0.170613
L2-7_01484	iscR_2	-0.272094	6.36718	3.88606	0.0486885	0.0874521
L2-7_02928	L2-7_02928	-0.271657	3.97511	2.44169	0.118149	0.185568
L2-7_00486	rmlA1_1	-0.271233	9.74026	2.79135	0.0947746	0.153413
L2-7_00858	L2-7_00858	-0.269661	8.31319	0.451471	0.501637	0.592654
L2-7_02308	alaA	-0.269317	7.00602	2.93156	0.0868635	0.142752
L2-7_01093	cdaR	-0.269204	8.15124	4.13903	0.0419053	0.0774888
L2-7_00796	cbiK	-0.268557	6.72726	2.65517	0.103214	0.165733
L2-7_01151	L2-7_01151	-0.266585	4.41432	2.5876	0.107703	0.171663
L2-7_01420	L2-7_01420	-0.265525	2.21985	1.07667	0.299445	0.389528
L2-7_01229	gluP	-0.265142	3.95562	3.15732	0.075587	0.127357
L2-7_00021	ptsH_1	-0.265071	11.4864	1.92556	0.165245	0.242926
L2-7_01904	L2-7_01904	-0.264832	5.42423	3.03384	0.081545	0.135361
L2-7_01235	L2-7_01235	-0.264233	1.37037	1.30659	0.253013	0.340223
L2-7_00601	L2-7_00601	-0.263765	5.50303	4.1717	0.0411045	0.0763253
L2-7_01664	mro	-0.263542	5.6657	3.01956	0.0822658	0.136168
L2-7_01059	ispG	-0.261849	5.51522	1.44393	0.229505	0.315696
L2-7_01560	L2-7_01560	-0.261433	7.40338	3.01939	0.0822743	0.136168
L2-7_00424	dpiB	-0.258918	5.15671	2.11155	0.146191	0.22154
L2-7_00685	L2-7_00685	-0.258411	7.38443	2.28599	0.130547	0.202318
L2-7_01851	L2-7_01851	-0.257766	2.02045	0.74258	0.388836	0.482728
L2-7_02913	hcpC	-0.256737	8.62472	2.06618	0.150598	0.226504
L2-7_02793	L2-7_02793	-0.256697	1.96728	0.591987	0.441652	0.535718
L2-7_00730	L2-7_00730	-0.254115	7.24611	0.585039	0.444344	0.538517
L2-7_00456	L2-7_00456	-0.254013	6.15119	1.67529	0.195551	0.278847
L2-7_02245	nfo	-0.253802	2.98393	1.68339	0.194474	0.277594
L2-7_02749	L2-7_02749	-0.253748	7.62676	3.19422	0.0738989	0.124738
L2-7_01726	phoR_2	-0.253626	5.53017	3.13261	0.076741	0.128501
L2-7_00661	L2-7_00661	-0.253528	8.27945	2.04071	0.153138	0.229296
L2-7_01873	nrnA_1	-0.253451	7.58155	2.3207	0.127663	0.198576
L2-7_02691	L2-7_02691	-0.252847	7.6272	2.03233	0.153985	0.229869
L2-7_01488	L2-7_01488	-0.252584	5.23083	2.87701	0.0898529	0.146632
L2-7_01793	rarA	-0.252248	5.33863	2.38804	0.122267	0.191392
L2-7_03008	L2-7_03008	-0.251567	2.89886	1.17845	0.277672	0.367171
L2-7_01025	degA_1	-0.2514	3.66999	1.74243	0.186831	0.268324
L2-7_00209	L2-7_00209	-0.250284	4.88878	3.05078	0.0806983	0.134194
L2-7_01088	L2-7_01088	-0.249408	8.20902	2.20811	0.137287	0.210091
L2-7_02794	L2-7_02794	-0.249356	3.51165	0.743767	0.388457	0.482471
L2-7_02078	nadE	-0.24794	6.84624	3.42163	0.0643476	0.111092
L2-7_02603	L2-7_02603	-0.247147	8.06523	2.46874	0.116131	0.183011
L2-7_00695	rlmL	-0.246332	7.35724	3.15028	0.075914	0.127678
L2-7_02290	recF	-0.24603	7.02646	1.16884	0.27964	0.369077
L2-7_00594	srpC_1	-0.245198	7.19567	3.54572	0.0596994	0.104028
L2-7_02028	cobB_2	-0.245172	5.54349	2.09494	0.147788	0.223024
L2-7_02841	L2-7_02841	-0.244933	1.35486	0.349057	0.554647	0.640611
L2-7_02551	bssA	-0.244855	3.21082	1.6051	0.205183	0.289633
L2-7_00214	pyrK_2	-0.244349	8.87072	2.07607	0.149625	0.225403
L2-7_02373	guaA	-0.24403	10.4733	1.97231	0.160202	0.237255
L2-7_02338	L2-7_02338	-0.241803	3.09574	1.61485	0.203811	0.288424
L2-7_00639	cwlC	-0.24104	8.4244	2.03858	0.153353	0.229296
L2-7_00729	L2-7_00729	-0.240281	6.76975	0.33517	0.56263	0.647429
L2-7_01324	L2-7_01324	-0.240035	5.25774	1.43644	0.230717	0.316741
L2-7_03059	L2-7_03059	-0.239828	4.78729	1.71397	0.190471	0.272788
L2-7_02653	L2-7_02653	-0.239828	0.794884	0.635966	0.425175	0.519103
L2-7_00978	L2-7_00978	-0.239655	9.85007	0.228576	0.632582	0.708998
L2-7_01535	glcK	-0.239607	6.29746	3.95466	0.0467417	0.0844969
L2-7_02377	L2-7_02377	-0.238265	6.89885	1.50299	0.220211	0.306828
L2-7_03044	L2-7_03044	-0.237404	1.18642	0.217239	0.641152	0.717455
L2-7_01697	lldD	-0.236879	6.04914	1.10481	0.293213	0.38338
L2-7_03027	L2-7_03027	-0.236325	7.01782	1.10315	0.293576	0.383675
L2-7_02288	dnaN	-0.235294	5.86744	0.592318	0.441524	0.535718
L2-7_02475	L2-7_02475	-0.234426	2.47695	0.784587	0.375742	0.469594
L2-7_00514	L2-7_00514	-0.234058	4.19639	1.86229	0.172361	0.251539
L2-7_00631	spmB	-0.233439	3.12995	1.45385	0.227911	0.313855
L2-7_02577	L2-7_02577	-0.23307	3.20542	1.49862	0.220884	0.307459
L2-7_03036	L2-7_03036	-0.232893	1.08194	0.432567	0.510732	0.601543
L2-7_02079	L2-7_02079	-0.232376	4.91673	1.81018	0.178486	0.258593
L2-7_01457	aroD	-0.231166	7.53087	0.604535	0.436853	0.531046
L2-7_02808	L2-7_02808	-0.23067	6.69779	3.99941	0.0455161	0.0831938
L2-7_01365	rimP	-0.229798	5.94281	2.4946	0.114237	0.180538
L2-7_02000	ecfT_3	-0.229382	3.43086	0.965978	0.325685	0.417461
L2-7_01680	L2-7_01680	-0.22908	5.13263	0.315091	0.574573	0.658136
L2-7_03003	L2-7_03003	-0.227401	3.07947	0.291692	0.589139	0.671862
L2-7_00743	tnpR_2	-0.226998	8.24239	2.22151	0.1361	0.208617
L2-7_01820	comEA	-0.226931	7.11215	1.07043	0.300848	0.391172
L2-7_00262	L2-7_00262	-0.226561	6.02995	1.94127	0.16353	0.241037
L2-7_00792	cobT	-0.226447	7.83484	1.48139	0.223557	0.310103
L2-7_00413	thiH	-0.22592	4.14007	1.80698	0.178871	0.259016
L2-7_02177	dapB	-0.225889	8.15468	1.10189	0.293851	0.383856
L2-7_01534	bioB_2	-0.225327	6.10769	3.13416	0.076668	0.128501
L2-7_00016	pyrK_1	-0.225326	7.36533	2.31079	0.128479	0.199666
L2-7_02778	idnD	-0.224336	8.55992	2.05095	0.152111	0.228167
L2-7_00347	acm	-0.223385	6.03035	2.4875	0.114754	0.181155
L2-7_02197	L2-7_02197	-0.22322	6.12549	0.361579	0.54763	0.634075
L2-7_02709	glgA_3	-0.222248	8.96716	1.72545	0.188992	0.271012
L2-7_01583	L2-7_01583	-0.220513	5.62337	0.911785	0.339641	0.431208
L2-7_00868	spo0C_2	-0.219408	2.28194	0.93237	0.334248	0.425904
L2-7_01614	L2-7_01614	-0.218544	5.74507	1.18425	0.276492	0.36613
L2-7_01531	L2-7_01531	-0.216741	5.59805	1.62529	0.202356	0.286798
L2-7_02922	mgsR	-0.216072	5.04406	1.81034	0.178468	0.258593
L2-7_01024	L2-7_01024	-0.215588	6.93005	1.79084	0.180824	0.261575
L2-7_02224	hhaIM_2	-0.215099	4.80922	2.25666	0.133041	0.205163
L2-7_00745	L2-7_00745	-0.214851	6.15873	2.25901	0.132839	0.204964
L2-7_00210	licR_1	-0.214313	6.28697	2.91649	0.0876782	0.143753
L2-7_02583	L2-7_02583	-0.214259	3.52549	1.1735	0.278682	0.367987
L2-7_02871	L2-7_02871	-0.212948	3.24416	0.523373	0.469406	0.562316
L2-7_01312	L2-7_01312	-0.21292	8.10616	2.47077	0.115981	0.182881
L2-7_01530	L2-7_01530	-0.21141	6.32663	1.34004	0.247027	0.33422
L2-7_01846	L2-7_01846	-0.210992	1.73777	0.671325	0.41259	0.506385
L2-7_00050	L2-7_00050	-0.210863	7.30072	0.701241	0.402367	0.495793
L2-7_00977	L2-7_00977	-0.210847	7.90151	0.154707	0.694077	0.761474
L2-7_00675	tig_1	-0.210733	6.36211	1.40494	0.235899	0.322434
L2-7_02504	pduV_4	-0.21067	6.91075	1.4095	0.235139	0.321708
L2-7_02690	hemZ	-0.210486	8.69596	1.32038	0.250524	0.337485
L2-7_01344	L2-7_01344	-0.209828	1.05563	0.410833	0.521547	0.611611
L2-7_01486	sdhB	-0.209744	4.88151	2.67209	0.102122	0.164262
L2-7_02022	L2-7_02022	-0.203922	8.05196	1.16111	0.281235	0.370658
L2-7_00934	srrA_2	-0.203394	7.65999	1.48011	0.223758	0.310227
L2-7_02218	L2-7_02218	-0.202262	5.48119	1.20394	0.272536	0.361735
L2-7_01625	mog	-0.201292	6.07508	1.48343	0.223239	0.309968
L2-7_02281	mnmE_2	-0.200835	6.32917	1.20333	0.272657	0.361735
L2-7_02878	L2-7_02878	-0.199674	1.2915	0.17246	0.677935	0.748608
L2-7_00015	pyrD	-0.199087	7.71025	1.56104	0.211513	0.296477
L2-7_01125	L2-7_01125	-0.198761	4.04877	0.399926	0.527128	0.616229
L2-7_02395	lgt	-0.198258	5.69903	1.8111	0.178376	0.258593
L2-7_02813	mutS2	-0.198252	8.13857	1.23282	0.266859	0.355221
L2-7_01153	L2-7_01153	-0.198191	7.77401	1.4033	0.236173	0.322498
L2-7_02044	L2-7_02044	-0.197771	4.75196	1.45401	0.227886	0.313855
L2-7_01718	sdpI	-0.197211	6.8166	2.12717	0.144707	0.219529
L2-7_01096	apeB	-0.197092	6.46299	2.10338	0.146974	0.222366
L2-7_01075	pfkA1	-0.196913	7.8927	2.28678	0.130481	0.202318
L2-7_03025	L2-7_03025	-0.196312	0.338616	0.290036	0.590197	0.672249
L2-7_00859	lptB	-0.195902	8.46872	0.240586	0.623784	0.700819
L2-7_00630	spmA	-0.195844	5.0653	2.37294	0.123455	0.193036
L2-7_02998	L2-7_02998	-0.194636	2.70602	0.907141	0.340874	0.432381
L2-7_00340	yrbG_1	-0.194313	6.52371	2.03782	0.15343	0.229296
L2-7_02734	nudF	-0.193153	3.61536	1.19653	0.274016	0.363366
L2-7_02291	gyrB	-0.192598	9.2935	1.48246	0.22339	0.310024
L2-7_00037	minC	-0.192564	7.57907	2.27822	0.131203	0.203145
L2-7_01383	L2-7_01383	-0.191625	5.40458	1.29001	0.256046	0.343438
L2-7_02997	L2-7_02997	-0.191387	2.64199	0.647642	0.420957	0.515525
L2-7_00128	L2-7_00128	-0.189781	1.89689	0.680685	0.409351	0.50285
L2-7_00196	L2-7_00196	-0.189663	4.08998	1.24966	0.263617	0.351741
L2-7_00261	hsdR_2	-0.188627	7.5041	2.0231	0.154922	0.231023
L2-7_01920	gmuF	-0.188546	9.80938	0.382868	0.536072	0.624304
L2-7_01839	ltaE	-0.187726	5.62899	0.61015	0.434731	0.528697
L2-7_00193	L2-7_00193	-0.187118	6.19501	1.95206	0.162365	0.239572
L2-7_00201	L2-7_00201	-0.186825	5.84707	2.01659	0.155589	0.23177
L2-7_00194	L2-7_00194	-0.18636	5.79923	2.05614	0.151594	0.227581
L2-7_00168	pdaC	-0.18561	8.63848	1.27945	0.258001	0.345563
L2-7_00197	L2-7_00197	-0.184874	5.45083	1.15161	0.283212	0.372739
L2-7_03055	uvrB_2	-0.183115	1.79013	0.792048	0.373481	0.467394
L2-7_01148	tlyA	-0.182456	6.92866	2.13238	0.144216	0.219021
L2-7_02996	L2-7_02996	-0.18207	3.98467	1.57225	0.209881	0.294632
L2-7_00985	apt	-0.182007	7.63392	1.57468	0.209529	0.294285
L2-7_02080	polC	-0.181737	8.28903	1.19002	0.275326	0.364759
L2-7_02116	L2-7_02116	-0.181638	2.50856	1.05196	0.305056	0.395177
L2-7_02942	rsmD	-0.181502	4.70788	1.46399	0.226297	0.31273
L2-7_01380	L2-7_01380	-0.181187	6.63863	1.39404	0.237725	0.323981
L2-7_01591	clpX_1	-0.180715	7.02814	1.34864	0.245515	0.332523
L2-7_02292	gyrA_2	-0.18041	10.0322	1.26959	0.259845	0.347149
L2-7_00423	L2-7_00423	-0.180334	4.62392	0.896319	0.343771	0.435464
L2-7_02043	L2-7_02043	-0.180252	1.46261	0.397647	0.528307	0.617055
L2-7_00437	cmoA	-0.180131	2.46007	0.276978	0.598689	0.678885
L2-7_00370	ybbD	-0.179652	7.04927	1.58558	0.207959	0.292373
L2-7_01140	L2-7_01140	-0.17864	6.43807	1.45778	0.227283	0.313564
L2-7_01951	L2-7_01951	-0.177984	4.80819	1.03727	0.308457	0.398844
L2-7_01154	L2-7_01154	-0.177608	7.73091	0.782251	0.376454	0.470273
L2-7_00543	L2-7_00543	-0.177019	10.9466	0.540748	0.462123	0.554785
L2-7_00167	efp	-0.176846	9.44571	0.898232	0.343256	0.435009
L2-7_02356	traG_3	-0.174388	4.03193	0.0849627	0.770681	0.822461
L2-7_00546	L2-7_00546	-0.174373	2.4643	0.277952	0.598047	0.678707
L2-7_01958	L2-7_01958	-0.174117	5.17496	1.29087	0.255887	0.343389
L2-7_00793	cbiC	-0.173168	6.49609	1.08745	0.297036	0.386934
L2-7_02253	L2-7_02253	-0.173008	3.04068	0.732069	0.392213	0.485904
L2-7_01424	L2-7_01424	-0.17299	2.34088	0.246268	0.619716	0.697647
L2-7_01745	lipR	-0.172219	5.70654	1.50687	0.219617	0.306458
L2-7_01915	licR_2	-0.171874	12.0859	0.485597	0.485898	0.577635
L2-7_01330	rhaR	-0.171152	6.10991	1.34411	0.246311	0.333412
L2-7_02110	L2-7_02110	-0.170702	3.68449	0.400383	0.526891	0.616229
L2-7_02980	L2-7_02980	-0.170649	3.97957	1.20644	0.272038	0.361598
L2-7_01692	L2-7_01692	-0.170234	7.28736	1.68961	0.193652	0.276702
L2-7_02568	L2-7_02568	-0.170226	8.92115	1.03222	0.309638	0.399634
L2-7_02343	L2-7_02343	-0.170157	6.401	2.07734	0.1495	0.225336
L2-7_03016	L2-7_03016	-0.169803	2.28618	0.634481	0.425716	0.519537
L2-7_02611	L2-7_02611	-0.169227	4.5	0.99664	0.318125	0.40853
L2-7_01458	aroE_2	-0.1689	6.98875	0.378447	0.538435	0.626015
L2-7_00863	L2-7_00863	-0.168327	9.00541	0.81112	0.367789	0.461301
L2-7_02750	L2-7_02750	-0.167454	6.92235	2.21033	0.13709	0.209905
L2-7_00516	L2-7_00516	-0.167101	5.58213	0.914266	0.338985	0.43057
L2-7_01406	L2-7_01406	-0.166588	3.66971	0.295357	0.586808	0.669477
L2-7_01582	rpsA	-0.164947	7.9948	0.384089	0.535423	0.623807
L2-7_01613	rsfS	-0.16494	5.03472	1.02365	0.311656	0.401767
L2-7_00307	aplIR	-0.163142	6.44504	1.60888	0.20465	0.289318
L2-7_01638	L2-7_01638	-0.161592	7.67639	1.02337	0.311721	0.401767
L2-7_02337	L2-7_02337	-0.161034	5.34513	1.46874	0.225545	0.311987
L2-7_02186	L2-7_02186	-0.159799	2.35935	0.338464	0.560717	0.645493
L2-7_01570	L2-7_01570	-0.159211	4.2519	1.0803	0.29863	0.388649
L2-7_01063	uppS	-0.159039	7.13842	1.34853	0.245536	0.332523
L2-7_02868	L2-7_02868	-0.158758	7.36953	1.52573	0.216754	0.302915
L2-7_00036	minD	-0.158036	7.11239	1.59341	0.20684	0.291385
L2-7_02489	L2-7_02489	-0.158005	7.08039	1.60633	0.205009	0.289611
L2-7_02810	trxA_4	-0.156602	4.94859	1.04295	0.307137	0.397688
L2-7_01757	L2-7_01757	-0.156121	4.40827	0.744115	0.388346	0.482471
L2-7_01872	truB	-0.155383	8.00009	0.749668	0.386581	0.480782
L2-7_00666	L2-7_00666	-0.155132	6.97268	1.33221	0.248413	0.335447
L2-7_02879	L2-7_02879	-0.154772	1.88486	0.314794	0.574753	0.658136
L2-7_01426	L2-7_01426	-0.15464	7.16277	1.39243	0.237996	0.324192
L2-7_02561	L2-7_02561	-0.154207	8.66004	0.949844	0.329759	0.421142
L2-7_01959	phoR_3	-0.153336	6.71977	1.79796	0.179959	0.260457
L2-7_00742	L2-7_00742	-0.151491	4.51147	0.644757	0.421994	0.516569
L2-7_01372	L2-7_01372	-0.151262	6.55036	0.774751	0.378751	0.472301
L2-7_02176	dapA	-0.151014	8.56822	0.568822	0.450727	0.544135
L2-7_02376	skfE	-0.149851	5.66162	0.271525	0.602311	0.681613
L2-7_00794	L2-7_00794	-0.149562	7.6943	0.625517	0.429005	0.523094
L2-7_01949	yheS_1	-0.148313	5.68059	0.628878	0.427767	0.521813
L2-7_01147	ppnK	-0.147607	7.37515	1.1488	0.2838	0.373337
L2-7_02024	L2-7_02024	-0.146782	6.11718	0.792645	0.373302	0.467378
L2-7_01150	L2-7_01150	-0.146759	6.91395	1.27037	0.259697	0.347149
L2-7_01952	pucA	-0.146502	4.61425	0.469305	0.493307	0.584459
L2-7_01061	dxr	-0.14536	7.94248	1.30406	0.253473	0.340639
L2-7_01862	L2-7_01862	-0.145308	5.96389	1.17476	0.278425	0.367987
L2-7_01434	Int-Tn_3	-0.14459	1.23191	0.168774	0.681203	0.751765
L2-7_00212	sleB	-0.144089	0.0707686	0.07633	0.782334	0.831601
L2-7_02809	trxB	-0.143894	6.70282	0.825955	0.363445	0.456369
L2-7_00535	cwlD	-0.143693	4.33216	0.236685	0.62661	0.70343
L2-7_01593	L2-7_01593	-0.14236	3.14521	0.65143	0.419602	0.51409
L2-7_01841	L2-7_01841	-0.140918	2.08877	0.49934	0.47979	0.572561
L2-7_00744	L2-7_00744	-0.140543	3.29033	0.290851	0.589676	0.671928
L2-7_00405	potA_1	-0.139138	-0.289859	0.0846656	0.771072	0.822461
L2-7_01246	L2-7_01246	-0.138539	6.37303	1.01458	0.313808	0.4039
L2-7_01374	ybeZ	-0.137545	7.08457	0.95707	0.327926	0.419566
L2-7_00444	mntR_1	-0.136775	2.09024	0.320434	0.571347	0.655575
L2-7_01353	macB_2	-0.136436	8.25525	0.894131	0.34436	0.436013
L2-7_01373	ybeY	-0.135115	5.22557	0.58059	0.446081	0.540389
L2-7_00697	L2-7_00697	-0.13484	6.59185	0.621908	0.430339	0.524265
L2-7_02252	vanW	-0.134739	7.74357	0.955103	0.328424	0.420011
L2-7_01577	tauB	-0.134255	1.64504	0.251429	0.61607	0.69466
L2-7_00198	L2-7_00198	-0.134137	3.48887	0.736044	0.390931	0.485045
L2-7_00154	thiI	-0.132646	6.97687	0.483086	0.487028	0.578733
L2-7_00555	toxA_2	-0.132526	6.08487	0.554006	0.456685	0.550853
L2-7_01665	mglB_1	-0.132042	5.40959	0.69476	0.40455	0.497826
L2-7_00687	alsT_1	-0.131604	7.67163	0.150893	0.697683	0.763935
L2-7_01485	sdhA	-0.130841	7.22268	0.995664	0.318362	0.408635
L2-7_01460	L2-7_01460	-0.129647	1.80939	0.306571	0.579792	0.662822
L2-7_02182	nrnA_2	-0.129583	9.13927	0.551641	0.457648	0.551303
L2-7_01637	L2-7_01637	-0.129411	6.79581	0.520097	0.4708	0.563512
L2-7_00798	cobK	-0.127814	6.41424	0.593581	0.441038	0.535437
L2-7_02279	rsmG	-0.126096	5.51277	0.851271	0.356193	0.447959
L2-7_00445	L2-7_00445	-0.124294	1.43609	0.161806	0.687499	0.756627
L2-7_00696	L2-7_00696	-0.123051	6.15359	0.586527	0.443765	0.538049
L2-7_01579	yvyD	-0.122801	8.4811	0.376739	0.539354	0.626822
L2-7_01608	L2-7_01608	-0.122252	3.18716	0.135187	0.713113	0.776883
L2-7_00976	L2-7_00976	-0.121067	9.71699	0.046206	0.829802	0.869848
L2-7_02375	ytrA_2	-0.120971	3.96636	0.0982829	0.7539	0.80967
L2-7_01233	L2-7_01233	-0.120455	1.63736	0.186394	0.665935	0.738641
L2-7_01871	ribF	-0.12004	7.99745	0.50393	0.477779	0.570403
L2-7_02487	L2-7_02487	-0.119425	5.3077	0.774944	0.378692	0.472301
L2-7_02867	L2-7_02867	-0.118251	2.81476	0.375931	0.539789	0.627068
L2-7_02849	L2-7_02849	-0.117965	2.52771	0.0559244	0.813058	0.855494
L2-7_00908	traG_1	-0.116769	4.04816	0.411257	0.521332	0.611611
L2-7_01496	rssA	-0.116489	6.48994	0.964234	0.326122	0.41783
L2-7_00399	opuCC	-0.116467	4.28598	0.374354	0.54064	0.627797
L2-7_02270	L2-7_02270	-0.115008	3.38056	0.410569	0.521681	0.611611
L2-7_01089	fabG_3	-0.114414	4.87066	0.44668	0.503916	0.594514
L2-7_00604	mtnN	-0.113462	7.78724	0.545944	0.45998	0.553242
L2-7_02293	ttdA_2	-0.113219	8.67036	0.539133	0.462792	0.555351
L2-7_00598	proC	-0.11312	5.54665	0.597516	0.439527	0.533834
L2-7_03015	baeS	-0.112852	1.96083	0.253904	0.614339	0.693266
L2-7_00626	alr	-0.112207	5.67695	0.522917	0.4696	0.562316
L2-7_00795	cbiT	-0.110428	7.52651	0.393648	0.530388	0.61897
L2-7_01652	L2-7_01652	-0.108897	3.97399	0.278212	0.597876	0.678707
L2-7_02654	L2-7_02654	-0.106898	1.86916	0.167963	0.681928	0.751973
L2-7_01095	L2-7_01095	-0.106825	5.34494	0.399864	0.52716	0.616229
L2-7_00489	mazG	-0.106647	6.35034	0.507793	0.476096	0.568879
L2-7_02278	L2-7_02278	-0.105873	5.67813	0.531197	0.466104	0.559086
L2-7_00144	cbh_1	-0.105168	5.4031	0.622311	0.43019	0.524265
L2-7_02207	cwlS_1	-0.103252	2.64214	0.16116	0.688091	0.756684
L2-7_02378	L2-7_02378	-0.102669	6.05152	0.387719	0.533501	0.622085
L2-7_01034	L2-7_01034	-0.102021	1.71665	0.1466	0.701806	0.768149
L2-7_02585	L2-7_02585	-0.101773	2.62722	0.274902	0.600062	0.679617
L2-7_00014	pyrE	-0.101651	8.66122	0.47609	0.490199	0.581022
L2-7_01717	sdpR	-0.101197	4.36872	0.452366	0.501213	0.592574
L2-7_02280	mnmG	-0.100563	7.70051	0.478668	0.489026	0.580159
L2-7_00040	mreC	-0.0997388	8.51051	0.34859	0.554912	0.640653
L2-7_00309	L2-7_00309	-0.0994337	4.93085	0.543948	0.460801	0.553673
L2-7_01617	obg	-0.0985027	7.09818	0.220542	0.638627	0.715201
L2-7_02593	rmlC	-0.0981201	5.76046	0.115705	0.733741	0.793187
L2-7_01423	L2-7_01423	-0.0979779	7.65844	0.379137	0.538066	0.625845
L2-7_02488	disA	-0.0971439	6.22511	0.733415	0.391778	0.485736
L2-7_00252	L2-7_00252	-0.0969353	3.28922	0.0373322	0.84679	0.882196
L2-7_01221	cca	-0.0963857	8.30399	0.42227	0.515807	0.60701
L2-7_00747	L2-7_00747	-0.0960951	4.82627	0.418883	0.517495	0.608486
L2-7_02614	znuC	-0.0943936	4.90393	0.211478	0.645611	0.720718
L2-7_00224	mscS	-0.0941867	6.07291	0.25354	0.614593	0.693273
L2-7_02719	hndD_2	-0.0940827	5.1196	0.394484	0.529952	0.618719
L2-7_00306	L2-7_00306	-0.0934012	6.2885	0.361712	0.547557	0.634075
L2-7_03024	L2-7_03024	-0.0931635	0.308978	0.0169366	0.896455	0.922463
L2-7_01578	L2-7_01578	-0.0920823	2.10098	0.203969	0.651536	0.725597
L2-7_02934	L2-7_02934	-0.0914599	6.11868	0.547887	0.459182	0.552913
L2-7_00263	L2-7_00263	-0.0900561	6.72876	0.415181	0.519352	0.609901
L2-7_00257	L2-7_00257	-0.0900011	1.2975	0.0609328	0.805028	0.85024
L2-7_00310	queC_1	-0.0894779	5.78265	0.255304	0.613365	0.692445
L2-7_02582	L2-7_02582	-0.0894681	5.01357	0.275489	0.599673	0.679452
L2-7_01050	L2-7_01050	-0.0888125	4.65673	0.272298	0.601795	0.681305
L2-7_02858	L2-7_02858	-0.0881164	5.32064	0.403145	0.52547	0.615538
L2-7_02779	ispD2	-0.0880497	7.70962	0.450207	0.502237	0.593033
L2-7_01601	L2-7_01601	-0.0870255	4.46282	0.110931	0.739087	0.797395
L2-7_01610	tcrA	-0.0847365	5.24417	0.29914	0.584422	0.667298
L2-7_02289	L2-7_02289	-0.0840249	4.1132	0.133277	0.715059	0.7787
L2-7_02244	L2-7_02244	-0.0832191	3.85875	0.146174	0.702219	0.7683
L2-7_01035	thiE	-0.0829145	2.00018	0.117388	0.731885	0.791487
L2-7_01252	mepA_8	-0.082785	5.87465	0.196991	0.657161	0.73099
L2-7_00114	L2-7_00114	-0.082379	6.3738	0.165574	0.684076	0.753748
L2-7_01268	rpsN1	-0.0820772	8.74752	0.069133	0.792603	0.840604
L2-7_02877	yeaJ_2	-0.0816114	3.02099	0.0990313	0.752995	0.809008
L2-7_00177	L2-7_00177	-0.0806553	4.75485	0.356205	0.550622	0.637012
L2-7_00975	L2-7_00975	-0.0801925	2.63496	0.108692	0.741638	0.799257
L2-7_03022	L2-7_03022	-0.0785157	3.4948	0.132554	0.715799	0.779087
L2-7_00308	L2-7_00308	-0.07837	6.21242	0.304401	0.581137	0.664088
L2-7_03005	L2-7_03005	-0.0778912	5.56299	0.233841	0.62869	0.7052
L2-7_01744	L2-7_01744	-0.0764294	4.6132	0.27951	0.597023	0.678369
L2-7_02601	L2-7_02601	-0.0740822	6.13507	0.129956	0.718477	0.780905
L2-7_02275	parB_1	-0.0737736	5.86485	0.144677	0.703675	0.768993
L2-7_02017	lytC_2	-0.0719136	8.56133	0.189119	0.663651	0.737039
L2-7_01584	tsaE	-0.0714101	5.04509	0.0968745	0.755613	0.810971
L2-7_02888	graS	-0.070586	3.4796	0.126193	0.722412	0.783255
L2-7_00449	L2-7_00449	-0.069357	3.30611	0.159569	0.689553	0.757995
L2-7_02242	ptsH_3	-0.0661705	5.84501	0.225746	0.634696	0.711083
L2-7_02175	btuR	-0.0659438	7.25071	0.12553	0.723113	0.783512
L2-7_01571	L2-7_01571	-0.065681	3.85375	0.082123	0.774441	0.825089
L2-7_00339	pduV_1	-0.0653461	5.36851	0.206652	0.649404	0.723799
L2-7_00435	L2-7_00435	-0.0646935	1.34691	0.0603484	0.805946	0.85089
L2-7_01193	L2-7_01193	-0.0623846	0.580436	0.0390072	0.843434	0.880187
L2-7_02276	soj_4	-0.06187	5.4537	0.0828033	0.773534	0.824436
L2-7_01056	cls_1	-0.0616566	6.10971	0.208002	0.648338	0.722898
L2-7_01868	L2-7_01868	-0.0616227	8.798	0.1723	0.678075	0.748608
L2-7_01135	eno_2	-0.0613112	4.5297	0.0525439	0.818694	0.860458
L2-7_02465	hgdC_2	-0.0609853	5.74138	0.200195	0.654563	0.72868
L2-7_02387	metA	-0.0608146	8.36225	0.161424	0.687849	0.756684
L2-7_01060	rasP	-0.0607568	7.37917	0.151449	0.697154	0.763935
L2-7_02357	L2-7_02357	-0.0606389	2.16819	0.00933878	0.923014	0.941495
L2-7_02883	ywaC_3	-0.0598105	3.35036	0.0943917	0.758666	0.81234
L2-7_01338	L2-7_01338	-0.0598034	6.17128	0.13183	0.716542	0.77916
L2-7_01329	glmU_1	-0.0598033	6.69793	0.205625	0.650218	0.724418
L2-7_00319	L2-7_00319	-0.058947	4.86107	0.168238	0.681683	0.751973
L2-7_00178	yxeP	-0.0574909	6.77535	0.190421	0.662566	0.736126
L2-7_00052	L2-7_00052	-0.0572785	2.0826	0.0170363	0.896152	0.922463
L2-7_02457	rpoC	-0.0569503	11.956	0.0963428	0.756263	0.810992
L2-7_00199	L2-7_00199	-0.0568242	4.12912	0.151402	0.697199	0.763935
L2-7_02675	L2-7_02675	-0.0564428	3.30198	0.102424	0.74894	0.80496
L2-7_01743	L2-7_01743	-0.0560612	5.0387	0.18635	0.665972	0.738641
L2-7_00245	L2-7_00245	-0.0550206	8.12467	0.157063	0.691875	0.759653
L2-7_02890	yxdM	-0.0512505	3.82316	0.0911677	0.762698	0.815368
L2-7_00432	L2-7_00432	-0.0486932	0.0160529	0.0139247	0.906065	0.929502
L2-7_01589	tsaD	-0.0473147	6.50135	0.063502	0.801044	0.847311
L2-7_01407	L2-7_01407	-0.0471288	5.10914	0.0277608	0.867672	0.899785
L2-7_01581	prfB	-0.0465997	7.13215	0.0364214	0.848648	0.883325
L2-7_02586	L2-7_02586	-0.046024	3.76886	0.0639872	0.800301	0.846845
L2-7_00244	crp	-0.0459226	3.60926	0.0691404	0.792592	0.840604
L2-7_02127	L2-7_02127	-0.0458649	6.88825	0.107132	0.743433	0.800884
L2-7_02882	ywiE_2	-0.0456486	5.12963	0.0854871	0.769995	0.822228
L2-7_02741	tnpR_3	-0.0455987	1.08281	0.0233146	0.878642	0.90847
L2-7_01641	ltrA_1	-0.0445145	11.47	0.0351316	0.85132	0.885449
L2-7_02277	argS	-0.0444783	7.15242	0.119983	0.729053	0.789034
L2-7_00545	mprA	-0.044102	1.26099	0.0174562	0.894888	0.92179
L2-7_02248	trmL	-0.0429825	6.53015	0.0903933	0.763678	0.816104
L2-7_00020	ptsI	-0.0423221	13.8956	0.0422347	0.837173	0.875937
L2-7_02171	yigZ	-0.042039	4.74257	0.0963221	0.756289	0.810992
L2-7_02600	L2-7_02600	-0.0415229	5.94701	0.0419903	0.837638	0.876096
L2-7_00564	dagK	-0.0406076	6.86565	0.0833213	0.772846	0.824016
L2-7_00542	L2-7_00542	-0.0402969	6.37856	0.049449	0.824025	0.865301
L2-7_00509	L2-7_00509	-0.0390403	9.03076	0.0423893	0.836879	0.875937
L2-7_01090	L2-7_01090	-0.0384499	8.7156	0.0590433	0.808015	0.852431
L2-7_01639	zupT_2	-0.0376853	7.84875	0.0463398	0.829559	0.869848
L2-7_03011	L2-7_03011	-0.0373313	0.949514	0.00421143	0.948257	0.96199
L2-7_01166	smc_2	-0.0361901	8.25112	0.0622324	0.803002	0.84874
L2-7_01072	mutT	-0.0361517	3.94533	0.0394116	0.842636	0.879681
L2-7_00583	L2-7_00583	-0.034797	5.27367	0.0149586	0.902657	0.927483
L2-7_00860	livF	-0.0346124	8.45098	0.00752929	0.930853	0.947421
L2-7_00674	L2-7_00674	-0.0340655	6.00187	0.0713444	0.789389	0.838147
L2-7_01097	spoIVA	-0.0322172	6.50622	0.0533	0.817417	0.859438
L2-7_01843	L2-7_01843	-0.0318562	3.18312	0.0261629	0.871503	0.902755
L2-7_02456	rpoB	-0.0312077	11.9706	0.0295058	0.863616	0.896242
L2-7_00264	L2-7_00264	-0.0304814	7.14943	0.059721	0.806938	0.851615
L2-7_01379	dhaK	-0.0303464	11.8413	0.0220865	0.881857	0.911122
L2-7_03014	L2-7_03014	-0.0299608	3.6181	0.00797989	0.928819	0.945695
L2-7_02407	L2-7_02407	-0.0292164	-0.250783	0.00393891	0.949957	0.963017
L2-7_00013	L2-7_00013	-0.0285243	5.83144	0.038069	0.845305	0.881401
L2-7_02580	L2-7_02580	-0.0273245	6.69599	0.0372617	0.846933	0.882196
L2-7_02581	L2-7_02581	-0.0267426	6.67575	0.0225015	0.880761	0.910325
L2-7_01425	rsrIM	-0.0265167	7.67807	0.0414637	0.838646	0.876823
L2-7_01332	L2-7_01332	-0.0257595	6.70607	0.0146259	0.90374	0.927925
L2-7_01010	L2-7_01010	-0.0255992	6.38469	0.0340794	0.853538	0.887426
L2-7_02748	putP_2	-0.0254555	8.98797	0.0198928	0.887837	0.915612
L2-7_02246	aroE_3	-0.0251029	3.79667	0.00475049	0.94505	0.959084
L2-7_00786	hemL	-0.0245932	6.88541	0.0233679	0.878504	0.90847
L2-7_00512	pbpD	-0.0244418	7.77073	0.0299506	0.862602	0.895521
L2-7_00046	mutS	-0.0243867	6.56343	0.0146231	0.90375	0.927925
L2-7_01410	rpfC_1	-0.0241855	6.72933	0.0264211	0.870876	0.902439
L2-7_00162	L2-7_00162	-0.0239952	7.07338	0.0370014	0.847462	0.882419
L2-7_00778	adaA	-0.0231308	2.4844	0.00807885	0.928381	0.945592
L2-7_01168	plsX	-0.0202827	4.90513	0.0089545	0.92461	0.942436
L2-7_01585	tsaB	-0.0201024	6.88021	0.0111066	0.916068	0.936455
L2-7_00861	L2-7_00861	-0.0197001	7.76586	0.00262393	0.959147	0.970227
L2-7_00912	L2-7_00912	-0.0195293	3.87346	0.00616223	0.93743	0.952617
L2-7_01989	L2-7_01989	-0.0195153	4.96918	0.00964572	0.921763	0.940561
L2-7_01675	yecS	-0.0189822	8.09759	0.00688375	0.933877	0.949464
L2-7_01624	L2-7_01624	-0.0170875	8.1556	0.0150951	0.902216	0.92737
L2-7_02797	walR	-0.0167081	4.85285	0.0089723	0.924535	0.942436
L2-7_01429	L2-7_01429	-0.0165984	1.14495	0.00292193	0.956891	0.968645
L2-7_01509	L2-7_01509	-0.0159839	4.13574	0.00385209	0.950511	0.96323
L2-7_00770	L2-7_00770	-0.0157957	5.99905	0.00995762	0.920513	0.939627
L2-7_01895	rlmCD_2	-0.0131158	7.00956	0.00239524	0.960966	0.971717
L2-7_00398	norM_1	-0.0126182	4.82558	0.00736838	0.931594	0.947831
L2-7_01719	L2-7_01719	-0.0123423	5.28273	0.00689481	0.933824	0.949464
L2-7_01017	L2-7_01017	-0.0108467	5.69439	0.00187116	0.965497	0.974891
L2-7_01273	rpmC	-0.0106048	8.85128	0.00106581	0.973956	0.980606
L2-7_01283	apbE	-0.0101339	4.92357	0.00195241	0.964756	0.974846
L2-7_02523	queC_2	-0.00999372	6.45831	0.0012244	0.972087	0.979427
L2-7_01350	yknX	-0.00913462	8.72388	0.00163147	0.967781	0.976463
L2-7_01339	stp_2	-0.00867903	5.99257	0.0027525	0.958159	0.969578
L2-7_00142	cooS	-0.00789363	3.34535	0.00156465	0.968447	0.976463
L2-7_00766	L2-7_00766	-0.00721588	1.48953	0.000675457	0.979266	0.984053
L2-7_01340	stkP	-0.00614139	6.47031	0.00159707	0.968122	0.976463
L2-7_02184	plsC	-0.00599235	7.75256	0.00208572	0.963574	0.974002
L2-7_02955	aroC	-0.00580467	6.7134	0.00189992	0.965233	0.974891
L2-7_02861	deoR_4	-0.00543762	6.08069	0.000840391	0.976873	0.983189
L2-7_00157	L2-7_00157	-0.00478305	5.56318	0.000773444	0.977813	0.983782
L2-7_01336	ftsW_1	-0.00409599	6.04825	0.000336381	0.985367	0.988188
L2-7_00192	L2-7_00192	-0.00384495	8.12423	0.000591379	0.980599	0.984816
L2-7_00397	L2-7_00397	-0.00335405	3.85053	0.000381113	0.984425	0.98795
L2-7_01737	L2-7_01737	-0.00304835	5.48077	0.000308261	0.985992	0.988461
L2-7_01960	srrA_3	-0.00299285	4.99133	0.000510069	0.981982	0.985852
L2-7_00371	purF	-0.00256354	9.17989	0.000214808	0.988306	0.990427
L2-7_01455	L2-7_01455	-0.00154477	3.87534	1.64e-05	0.99677	0.99677
L2-7_01048	L2-7_01048	0.00081332	8.02185	2.84e-05	0.995746	0.996458
L2-7_02433	L2-7_02433	0.000948545	1.62464	1.72e-05	0.996694	0.99677
L2-7_02261	aseR	0.0014618	5.26796	4.24e-05	0.994807	0.995873
L2-7_02321	cysK_2	0.00236271	5.97962	0.000118812	0.991303	0.993075
L2-7_02305	csoR_2	0.0027819	1.00173	9.11e-05	0.992386	0.993805
L2-7_02970	L2-7_02970	0.00377523	8.80048	0.000354846	0.984971	0.988145
L2-7_00797	cbiL	0.0041169	5.59715	0.000686698	0.979094	0.984053
L2-7_01325	L2-7_01325	0.00530418	5.53777	0.000661074	0.979488	0.984053
L2-7_01674	artM	0.00546056	8.74864	0.000704743	0.978821	0.984053
L2-7_00686	L2-7_00686	0.00563621	4.38626	0.001136	0.973113	0.980108
L2-7_02722	barA_2	0.00679672	6.56756	0.00161452	0.967949	0.976463
L2-7_02282	L2-7_02282	0.00744929	8.59835	0.00123843	0.971927	0.979427
L2-7_00260	L2-7_00260	0.00892451	5.41518	0.00399529	0.949601	0.963004
L2-7_02726	L2-7_02726	0.0102075	4.43851	0.00363589	0.951918	0.963959
L2-7_02081	dapH	0.0116136	4.68025	0.00552578	0.940743	0.955405
L2-7_02902	L2-7_02902	0.0124973	7.68167	0.00825295	0.927615	0.945156
L2-7_02444	rluD_2	0.0128269	3.35049	0.00374396	0.95121	0.96359
L2-7_01247	L2-7_01247	0.0135036	5.26223	0.0100036	0.92033	0.939627
L2-7_00642	L2-7_00642	0.0156293	6.2041	0.00475554	0.945021	0.959084
L2-7_02307	L2-7_02307	0.0174051	3.35496	0.00611745	0.937658	0.952617
L2-7_01091	L2-7_01091	0.0180308	8.09073	0.0164507	0.897943	0.92332
L2-7_00667	purR	0.0197509	5.84983	0.0209015	0.885048	0.913408
L2-7_01149	dxs_1	0.0203933	8.16622	0.0187542	0.891073	0.918612
L2-7_02283	misCB	0.0204713	9.58508	0.00998563	0.920401	0.939627
L2-7_02889	yxdL	0.0206577	2.6069	0.0101861	0.919609	0.939627
L2-7_02254	L2-7_02254	0.020896	6.02654	0.0164495	0.897947	0.92332
L2-7_02047	L2-7_02047	0.0214144	5.27201	0.0132514	0.908354	0.930947
L2-7_02671	amiC	0.0233375	5.03164	0.0216798	0.882942	0.911907
L2-7_00369	ppk_1	0.025334	7.77	0.0405442	0.84042	0.878023
L2-7_02725	L2-7_02725	0.0260085	2.46188	0.0138604	0.906281	0.929502
L2-7_02961	prtP	0.0272706	1.21757	0.0122059	0.912028	0.933564
L2-7_00189	L2-7_00189	0.0277552	7.19256	0.0579363	0.809788	0.853659
L2-7_01419	mtrR_1	0.0279659	2.62736	0.0111083	0.916062	0.936455
L2-7_02051	csoR_1	0.0291755	6.38452	0.0173712	0.895143	0.92179
L2-7_01545	L2-7_01545	0.0305645	7.73784	0.0139245	0.906066	0.929502
L2-7_02798	phoR_5	0.0309937	5.5424	0.0462782	0.829671	0.869848
L2-7_01261	L2-7_01261	0.0311631	12.1871	0.0134237	0.907763	0.930681
L2-7_02859	rpfC_5	0.0313251	6.26011	0.026711	0.870176	0.902047
L2-7_03013	L2-7_03013	0.0321052	6.50752	0.0453415	0.831377	0.871174
L2-7_00041	mreB_1	0.0322351	8.82084	0.0302161	0.862001	0.895228
L2-7_01411	hisJ	0.0322797	5.14126	0.0318526	0.858351	0.8921
L2-7_02730	L2-7_02730	0.0332173	6.70394	0.0257232	0.872578	0.903534
L2-7_01254	L2-7_01254	0.0350952	3.68332	0.0184185	0.892047	0.919277
L2-7_01270	rplX	0.03537	10.0378	0.0128144	0.909872	0.93182
L2-7_00641	L2-7_00641	0.0371168	5.6389	0.0564159	0.812253	0.855276
L2-7_02562	L2-7_02562	0.0371205	4.06056	0.0379515	0.845541	0.881401
L2-7_01251	mepA_7	0.037447	5.84911	0.0663756	0.796689	0.843978
L2-7_01388	L2-7_01388	0.0379555	5.00105	0.0285436	0.865837	0.898214
L2-7_01331	L2-7_01331	0.0391504	5.12817	0.0431113	0.835516	0.875183
L2-7_00909	L2-7_00909	0.0393585	7.73873	0.0395451	0.842373	0.879681
L2-7_01842	L2-7_01842	0.0407415	2.53556	0.0358243	0.849879	0.884278
L2-7_01631	L2-7_01631	0.0410696	2.78411	0.0121469	0.912241	0.933564
L2-7_01113	fmt	0.0417218	7.6892	0.104115	0.746946	0.80405
L2-7_02111	L2-7_02111	0.04231	5.21377	0.0307816	0.860728	0.894239
L2-7_01939	L2-7_01939	0.0427677	9.71428	0.0729655	0.787067	0.835998
L2-7_01626	moaA	0.0430386	6.02487	0.0955127	0.757283	0.811747
L2-7_00191	mrnC	0.0439102	7.08143	0.0879944	0.766743	0.819067
L2-7_02027	L2-7_02027	0.0443954	5.02206	0.0846486	0.771094	0.822461
L2-7_00396	ybhF_1	0.0444007	3.44938	0.0582473	0.809288	0.853453
L2-7_02575	dnaG_4	0.0449277	-0.00478438	0.0129377	0.909441	0.93172
L2-7_01672	ywpJ_2	0.0458295	4.44532	0.0407184	0.840083	0.877997
L2-7_02598	L2-7_02598	0.0467735	6.39395	0.0210726	0.884581	0.913263
L2-7_02054	tetO_2	0.0471582	8.62155	0.0571544	0.811051	0.854669
L2-7_01501	hacB	0.0497702	6.99983	0.0678692	0.794465	0.841941
L2-7_01272	rpsQ	0.0499523	9.07337	0.0243346	0.876037	0.906631
L2-7_01271	rplN	0.0502492	10.48	0.0242636	0.876216	0.906631
L2-7_02010	recD2	0.0505348	8.67575	0.0968106	0.755691	0.810971
L2-7_01984	mnmE_1	0.0525584	5.48205	0.113396	0.736311	0.795352
L2-7_01557	L2-7_01557	0.0528285	7.0207	0.126609	0.721974	0.783255
L2-7_01869	L2-7_01869	0.0531672	4.16039	0.0493327	0.824229	0.865301
L2-7_02294	fumA	0.0541017	7.27474	0.126019	0.722596	0.783255
L2-7_02183	malQ_3	0.0542153	8.5703	0.13178	0.716594	0.77916
L2-7_02546	truA_2	0.0552352	5.72899	0.209395	0.647242	0.721963
L2-7_02643	L2-7_02643	0.0554375	4.33971	0.0652944	0.798316	0.845382
L2-7_01013	sbcC	0.0556851	6.92814	0.129197	0.719266	0.78146
L2-7_02430	L2-7_02430	0.0559728	2.8961	0.05574	0.81336	0.855494
L2-7_01937	iphP	0.0562912	4.96997	0.0641736	0.800017	0.846845
L2-7_00603	L2-7_00603	0.0564064	5.90799	0.0562814	0.812473	0.855276
L2-7_00799	cobB_1	0.0568971	6.69614	0.112829	0.736947	0.795732
L2-7_01994	rpsM	0.0569969	10.5674	0.0764399	0.782181	0.831601
L2-7_00354	L2-7_00354	0.0590533	6.47972	0.181051	0.670471	0.741967
L2-7_02742	L2-7_02742	0.0591846	2.36932	0.0915789	0.762179	0.815125
L2-7_00655	L2-7_00655	0.0594335	6.35474	0.212502	0.644813	0.720402
L2-7_01371	L2-7_01371	0.0604166	7.34016	0.136953	0.711329	0.775241
L2-7_01263	rpmD	0.0605169	9.75101	0.0386401	0.844163	0.88062
L2-7_02764	ygaZ_2	0.060784	3.74066	0.1427	0.705611	0.770508
L2-7_02124	L2-7_02124	0.0615135	4.35691	0.069661	0.791831	0.840421
L2-7_01262	rplO	0.0621628	10.7872	0.0429103	0.835894	0.875253
L2-7_02857	L2-7_02857	0.06241	2.29671	0.0617355	0.803774	0.849236
L2-7_02362	ywqN_3	0.0626013	4.62912	0.126317	0.722282	0.783255
L2-7_00541	ribD	0.0627376	11.4337	0.103728	0.7474	0.80423
L2-7_01073	L2-7_01073	0.0628422	3.83844	0.113986	0.73565	0.794945
L2-7_01428	L2-7_01428	0.0643633	7.53917	0.132386	0.715971	0.779087
L2-7_00964	fldC	0.0650699	5.70958	0.245177	0.620492	0.69796
L2-7_01267	rpsH	0.0655473	10.1248	0.0466641	0.828973	0.869848
L2-7_01108	L2-7_01108	0.0658463	6.15929	0.162013	0.68731	0.756627
L2-7_00320	L2-7_00320	0.0711036	5.19346	0.153096	0.695595	0.76284
L2-7_01416	L2-7_01416	0.0726951	3.78167	0.0942518	0.75884	0.81234
L2-7_00774	L2-7_00774	0.072955	6.09947	0.144964	0.703395	0.768987
L2-7_02306	L2-7_02306	0.0740988	4.30266	0.12695	0.721616	0.783255
L2-7_01115	rlmN	0.0746932	7.7565	0.277346	0.598446	0.678885
L2-7_00352	yitJ	0.0758071	6.89054	0.290963	0.589604	0.671928
L2-7_01012	sbcD	0.0761793	5.86131	0.250411	0.616785	0.694759
L2-7_02366	spo0C_5	0.0761995	0.860683	0.0502776	0.822581	0.864219
L2-7_01789	rpsP	0.0774629	8.53492	0.1381	0.710177	0.774794
L2-7_01177	L2-7_01177	0.0786742	6.6707	0.184529	0.66751	0.739273
L2-7_01132	trkA	0.0799823	6.9161	0.42432	0.514789	0.606067
L2-7_01859	yycJ	0.0803131	7.01251	0.183138	0.66869	0.740289
L2-7_00504	pth	0.0809247	6.52272	0.241435	0.623171	0.700412
L2-7_00539	ribBA	0.0812774	11.9638	0.213403	0.644114	0.719907
L2-7_00135	btr_1	0.0815959	3.75637	0.158143	0.690872	0.758849
L2-7_00700	ybbH_1	0.0820724	2.3851	0.12297	0.725836	0.786159
L2-7_02319	L2-7_02319	0.0826138	3.12293	0.0926555	0.760828	0.81399
L2-7_03004	L2-7_03004	0.0836901	4.98462	0.235636	0.627376	0.704007
L2-7_01114	rsmB	0.0838051	8.29556	0.313753	0.575386	0.658591
L2-7_01343	L2-7_01343	0.0843696	5.17632	0.195366	0.658488	0.732175
L2-7_00141	L2-7_00141	0.0845872	2.7556	0.185517	0.666675	0.738641
L2-7_02438	sir	0.0848909	6.95956	0.366796	0.544756	0.631791
L2-7_00409	nfdA	0.0855949	0.283393	0.056239	0.812542	0.855276
L2-7_01226	pfkA_2	0.0859053	8.99699	0.250245	0.616902	0.694759
L2-7_01990	L2-7_01990	0.0860333	4.88172	0.285521	0.593105	0.674465
L2-7_01995	rpsK	0.0872252	10.1548	0.174126	0.676471	0.747426
L2-7_01117	prkC_2	0.0879619	8.78834	0.276056	0.599298	0.679302
L2-7_02349	L2-7_02349	0.0889646	0.863579	0.0687962	0.793098	0.84081
L2-7_00246	argH1	0.0896009	8.10085	0.347421	0.555577	0.641156
L2-7_00351	L2-7_00351	0.0897247	5.95456	0.331599	0.564719	0.649157
L2-7_01116	stp_1	0.0898911	6.97535	0.4875	0.485044	0.576865
L2-7_01146	argR	0.0908491	6.12633	0.398575	0.527826	0.616751
L2-7_00806	fabH	0.0918273	8.60751	0.0119417	0.912982	0.933981
L2-7_00958	ftsH_1	0.0944931	9.07386	0.311754	0.576606	0.659718
L2-7_01361	L2-7_01361	0.0952921	0.469074	0.0814366	0.77536	0.825754
L2-7_00662	L2-7_00662	0.0953947	7.79824	0.257906	0.611563	0.691141
L2-7_02380	mutX	0.0958807	2.69213	0.151055	0.697529	0.763935
L2-7_01988	adk	0.0986937	8.39307	0.186299	0.666015	0.738641
L2-7_01857	L2-7_01857	0.0988602	9.12617	0.104552	0.746434	0.803808
L2-7_01938	recG	0.0990936	7.013	0.215855	0.642217	0.71836
L2-7_01045	L2-7_01045	0.0991266	2.48146	0.156098	0.692775	0.760343
L2-7_01118	rsgA	0.099293	7.19296	0.491782	0.483134	0.575081
L2-7_02168	L2-7_02168	0.0994285	6.44645	0.492188	0.482953	0.575081
L2-7_02167	ldh_1	0.100184	6.32619	0.494968	0.481719	0.574374
L2-7_00957	uvrC	0.100256	7.41975	0.478698	0.489013	0.580159
L2-7_01269	rplE	0.100841	10.707	0.0951144	0.757773	0.811962
L2-7_00171	L2-7_00171	0.101023	2.41255	0.0798325	0.777525	0.827116
L2-7_00478	L2-7_00478	0.101081	7.08331	0.162015	0.687308	0.756627
L2-7_01225	recR	0.101695	7.79183	0.444151	0.505126	0.595619
L2-7_01098	yjbM	0.101738	7.2713	0.352812	0.552526	0.638423
L2-7_01636	L2-7_01636	0.101854	7.3001	0.242535	0.622381	0.699804
L2-7_01648	L2-7_01648	0.102317	1.01896	0.127118	0.721439	0.783255
L2-7_01250	ymdB_2	0.10311	3.927	0.301804	0.582754	0.665665
L2-7_01264	rpsE	0.103291	10.7148	0.110971	0.739042	0.797395
L2-7_00966	fbpC	0.104372	5.67251	0.219077	0.639744	0.716165
L2-7_00160	rnjA	0.104411	9.67896	0.454925	0.500006	0.591395
L2-7_02174	hisS	0.104975	6.48572	0.379309	0.537973	0.625845
L2-7_00780	malR	0.105463	3.96202	0.331153	0.564981	0.649157
L2-7_00057	sigA_1	0.106043	7.6727	0.110707	0.739341	0.797395
L2-7_00989	L2-7_00989	0.107399	8.62389	0.214822	0.643014	0.718964
L2-7_02367	soj_5	0.107503	0.530292	0.103149	0.748083	0.804549
L2-7_03001	L2-7_03001	0.107968	3.28221	0.362448	0.54715	0.634042
L2-7_00602	murG	0.108601	8.27065	0.373692	0.540999	0.627953
L2-7_01021	ddpA	0.10949	3.43517	0.10299	0.748271	0.804549
L2-7_01232	L2-7_01232	0.109831	-0.0555139	0.0812156	0.775657	0.825756
L2-7_01706	L2-7_01706	0.109947	7.01655	0.70582	0.400835	0.494557
L2-7_00706	mobA_1	0.110005	0.392599	0.0809346	0.776035	0.825845
L2-7_02502	L2-7_02502	0.110553	3.74244	0.490341	0.483775	0.5756
L2-7_00663	L2-7_00663	0.111123	6.52442	0.288525	0.591168	0.673081
L2-7_02435	pduB_3	0.111381	6.55598	0.0744304	0.784992	0.83411
L2-7_02911	uvrB_1	0.111718	8.40276	0.573283	0.448957	0.542934
L2-7_02115	L2-7_02115	0.112182	1.00004	0.145246	0.703121	0.768987
L2-7_02534	upp	0.113878	7.67228	0.440833	0.506721	0.59707
L2-7_02538	ytrA_3	0.114264	4.02202	0.0201858	0.887019	0.915106
L2-7_00746	L2-7_00746	0.114384	3.57058	0.325916	0.568074	0.652086
L2-7_00659	L2-7_00659	0.114588	8.57523	0.137636	0.710642	0.774794
L2-7_01690	hom_2	0.115349	8.17051	0.23777	0.625822	0.702827
L2-7_01483	srpC_3	0.115954	5.91267	0.23266	0.629558	0.705891
L2-7_01574	L2-7_01574	0.116802	5.18774	0.569607	0.450415	0.544135
L2-7_02205	L2-7_02205	0.118833	1.37693	0.16714	0.682666	0.75249
L2-7_01141	msbA	0.121006	6.24674	0.880189	0.34815	0.439421
L2-7_02522	folE	0.122019	5.85258	0.174723	0.675948	0.747333
L2-7_02979	bvgS_2	0.12246	6.26759	0.804693	0.369694	0.463482
L2-7_01103	rluC_2	0.122489	6.8366	0.937375	0.332954	0.424834
L2-7_00318	L2-7_00318	0.123095	4.28976	0.141284	0.707008	0.771732
L2-7_00665	L2-7_00665	0.123942	7.45964	0.655098	0.418296	0.512714
L2-7_02521	queE	0.12498	5.59315	0.192107	0.661169	0.734865
L2-7_02381	thrC	0.125326	7.91079	0.31664	0.573634	0.657391
L2-7_02689	rpfG_2	0.127748	6.82638	0.768565	0.380661	0.474261
L2-7_03076	L2-7_03076	0.127849	4.52863	0.143973	0.704363	0.769445
L2-7_02241	alsT_3	0.127902	7.90036	0.888512	0.345881	0.437468
L2-7_00511	prs	0.128007	9.19412	0.655297	0.418225	0.512714
L2-7_02801	L2-7_02801	0.130129	1.8763	0.137783	0.710495	0.774794
L2-7_00777	L2-7_00777	0.130147	4.45599	0.643474	0.422456	0.516909
L2-7_02426	L2-7_02426	0.130222	2.11119	0.212054	0.645162	0.720504
L2-7_00538	ribH	0.131779	10.9035	0.541529	0.4618	0.554635
L2-7_02915	L2-7_02915	0.133111	3.31749	0.385788	0.534522	0.623016
L2-7_02030	hscC	0.133126	7.52047	0.763157	0.382342	0.475744
L2-7_02234	L2-7_02234	0.134183	0.909082	0.174526	0.67612	0.747333
L2-7_00537	L2-7_00537	0.134545	10.4251	0.697552	0.403607	0.497103
L2-7_02516	L2-7_02516	0.135867	6.03312	0.574283	0.448562	0.54269
L2-7_02564	valS	0.136832	9.36495	0.763532	0.382226	0.475744
L2-7_01051	dfrA	0.137777	4.67208	0.530082	0.466572	0.559408
L2-7_00047	miaB	0.139488	6.06592	0.61835	0.431661	0.525419
L2-7_01392	hisZ	0.140175	6.09764	0.479166	0.4888	0.580159
L2-7_02126	pncB2	0.140478	8.7115	0.710616	0.399239	0.493458
L2-7_01391	hisG	0.140687	5.63786	0.462995	0.496227	0.587671
L2-7_02004	yheS_2	0.140694	5.29052	0.888156	0.345978	0.437468
L2-7_02083	alaS_2	0.141029	8.38337	0.745573	0.387882	0.482185
L2-7_02792	hicB	0.143944	4.91921	0.730133	0.39284	0.486219
L2-7_02348	L2-7_02348	0.145936	0.426451	0.178468	0.672693	0.744132
L2-7_01527	L2-7_01527	0.146079	2.85603	0.280126	0.596618	0.678184
L2-7_01390	hisD	0.146111	6.37111	0.382056	0.536505	0.624548
L2-7_01556	L2-7_01556	0.146657	6.98982	0.793937	0.372912	0.467099
L2-7_00940	metK_2	0.146944	8.90824	0.416262	0.518808	0.609518
L2-7_01676	glnH_1	0.147063	8.52614	0.365429	0.545506	0.632399
L2-7_00865	L2-7_00865	0.147321	-0.114672	0.119209	0.729894	0.789639
L2-7_02461	tuf	0.147342	13.9456	0.30702	0.579515	0.662776
L2-7_00479	L2-7_00479	0.147612	6.83491	0.355665	0.550923	0.637098
L2-7_01408	L2-7_01408	0.147713	5.65538	0.477541	0.489538	0.580485
L2-7_02052	sufB	0.148129	8.22679	0.402683	0.525707	0.615558
L2-7_00970	lysA	0.148736	6.22349	0.411835	0.52104	0.611611
L2-7_02995	L2-7_02995	0.148836	3.45605	1.05256	0.304918	0.395177
L2-7_01502	dmdA_1	0.149419	7.81594	0.505702	0.477005	0.569722
L2-7_01650	L2-7_01650	0.149559	2.77961	0.338629	0.560622	0.645493
L2-7_00305	L2-7_00305	0.151462	5.49403	0.551954	0.45752	0.551303
L2-7_02284	yidD	0.15152	6.25082	0.95424	0.328642	0.420098
L2-7_00158	yrrK	0.151554	7.34623	1.2995	0.254305	0.341429
L2-7_02678	degA_2	0.153884	4.00996	0.25046	0.616751	0.694759
L2-7_02249	patA_3	0.153897	7.0592	1.37059	0.24171	0.328613
L2-7_02589	mta_2	0.154919	4.78533	0.785206	0.375554	0.469568
L2-7_02672	L2-7_02672	0.15612	5.34564	1.1817	0.277009	0.366642
L2-7_03012	L2-7_03012	0.156467	4.44487	0.701397	0.402315	0.495793
L2-7_01277	rpsS	0.156511	9.37777	0.245413	0.620323	0.69796
L2-7_00138	metK_1	0.15664	6.15814	0.893094	0.34464	0.436171
L2-7_02909	L2-7_02909	0.157214	0.934332	0.15919	0.689903	0.758082
L2-7_02718	gltD_2	0.157223	4.57874	1.09163	0.29611	0.385907
L2-7_00304	L2-7_00304	0.157264	5.83081	1.09723	0.294875	0.384787
L2-7_01400	L2-7_01400	0.157431	4.68086	0.457966	0.498576	0.590203
L2-7_01389	hisB	0.157782	5.42108	0.45574	0.499621	0.591191
L2-7_01304	cmpR_1	0.158381	5.87601	1.37902	0.240268	0.32697
L2-7_02273	L2-7_02273	0.159715	4.61764	0.77863	0.37756	0.471446
L2-7_00963	dnaE	0.160026	7.53075	1.64876	0.199128	0.283227
L2-7_01102	L2-7_01102	0.160694	6.00515	1.66225	0.1973	0.281198
L2-7_02681	L2-7_02681	0.16192	2.09756	0.515175	0.472907	0.565551
L2-7_01618	rpmA	0.162235	10.8178	0.492851	0.482658	0.575004
L2-7_01067	smpB	0.163036	5.02197	0.861307	0.353373	0.445412
L2-7_01334	L2-7_01334	0.164602	6.67165	0.68892	0.406532	0.500045
L2-7_02361	L2-7_02361	0.164923	3.2544	0.494322	0.482006	0.57447
L2-7_01104	recU	0.165171	5.13875	1.7287	0.188577	0.270554
L2-7_02919	ppiB	0.166355	7.43554	0.769072	0.380504	0.474261
L2-7_00145	L2-7_00145	0.166437	3.68846	0.569074	0.450627	0.544135
L2-7_00200	hsdR_1	0.1666	7.0341	1.74307	0.18675	0.268324
L2-7_02796	L2-7_02796	0.16724	4.01575	0.857087	0.354555	0.446501
L2-7_02285	rnpA	0.168134	8.239	1.12841	0.288114	0.378124
L2-7_01996	rpsD	0.168158	10.8089	0.51754	0.471893	0.564579
L2-7_02425	mepA_12	0.168359	4.58826	1.35802	0.24388	0.330601
L2-7_01370	L2-7_01370	0.168505	4.99634	1.16748	0.27992	0.369273
L2-7_00452	lexA_1	0.168692	1.30261	0.34686	0.555896	0.64126
L2-7_00153	iscS	0.168917	6.67056	0.868493	0.351373	0.44329
L2-7_00395	L2-7_00395	0.169104	2.53319	0.641035	0.423336	0.517309
L2-7_01587	L2-7_01587	0.169935	3.54432	0.678724	0.410027	0.503459
L2-7_01342	L2-7_01342	0.170016	6.35834	1.01811	0.312969	0.403005
L2-7_01259	L2-7_01259	0.170206	6.1741	1.77308	0.183001	0.263906
L2-7_02075	L2-7_02075	0.170224	5.24288	0.210554	0.646333	0.721237
L2-7_01278	rplB	0.170302	11.2292	0.297764	0.585287	0.668014
L2-7_01701	clpP	0.171674	9.7297	0.601414	0.438039	0.532257
L2-7_01224	L2-7_01224	0.172324	6.06992	1.65288	0.198568	0.282717
L2-7_01705	L2-7_01705	0.172345	6.09617	1.20568	0.27219	0.36163
L2-7_00775	proX	0.172932	5.326	1.78193	0.181913	0.262806
L2-7_02304	copA	0.17333	5.92601	1.40327	0.236176	0.322498
L2-7_00188	ispF	0.17343	5.82523	2.09641	0.147645	0.223024
L2-7_01248	mepA_6	0.173873	7.70547	1.46849	0.225584	0.311987
L2-7_02495	gatB	0.174872	8.66896	0.777419	0.377932	0.471699
L2-7_00451	dinB_3	0.17532	3.80826	0.564412	0.452488	0.546025
L2-7_01165	ftsY	0.17557	6.76719	1.14166	0.285301	0.37496
L2-7_02806	mnmA	0.175969	7.11794	1.4355	0.230869	0.316795
L2-7_00581	rpiB	0.176128	5.91526	1.36509	0.242658	0.329262
L2-7_01771	rex	0.176955	8.77623	1.13871	0.285924	0.375426
L2-7_02884	cbh_2	0.177102	4.23227	1.01204	0.314414	0.404494
L2-7_02535	pbuG	0.179706	9.51275	1.14044	0.28556	0.375124
L2-7_01266	rplF	0.179792	10.867	0.339197	0.560293	0.645493
L2-7_02800	L2-7_02800	0.180159	4.12693	1.45835	0.227193	0.313564
L2-7_00051	dinB_1	0.180178	8.36737	0.417163	0.518356	0.609242
L2-7_01335	L2-7_01335	0.180216	4.65727	0.730064	0.392862	0.486219
L2-7_00959	L2-7_00959	0.180597	7.81818	1.53168	0.21586	0.301967
L2-7_02009	mreB_2	0.18067	7.36425	0.683254	0.408469	0.501986
L2-7_02429	gltS	0.180728	5.61077	1.5971	0.206315	0.290792
L2-7_02097	L2-7_02097	0.180729	2.33497	0.708887	0.399814	0.493732
L2-7_01249	L2-7_01249	0.181328	5.64207	1.70524	0.191604	0.274195
L2-7_01164	tdcB	0.181627	7.47251	1.19317	0.27469	0.364088
L2-7_03029	L2-7_03029	0.181775	0.262829	0.0941261	0.758996	0.81234
L2-7_02413	ptsG_2	0.182061	4.77695	1.87202	0.171244	0.25044
L2-7_00105	L2-7_00105	0.182485	8.27867	1.11885	0.290167	0.380106
L2-7_01351	macB_1	0.183576	7.19961	1.61256	0.204132	0.288732
L2-7_00856	L2-7_00856	0.184283	10.0242	0.185628	0.66658	0.738641
L2-7_00383	L2-7_00383	0.184532	2.85033	0.186096	0.666186	0.738641
L2-7_02536	L2-7_02536	0.185439	6.71967	0.0629384	0.80191	0.847907
L2-7_02799	macB_4	0.185834	1.2425	0.319317	0.572019	0.655809
L2-7_00297	ntcA_1	0.186959	6.27995	0.451329	0.501704	0.592654
L2-7_02257	L2-7_02257	0.187568	0.823749	0.197869	0.656447	0.730486
L2-7_02880	hssR	0.188373	2.23588	0.835445	0.360703	0.453224
L2-7_00654	rsmA	0.189018	6.24707	2.43622	0.118562	0.186112
L2-7_00501	rsmF_1	0.190009	7.12656	1.31393	0.251684	0.338722
L2-7_00007	purE_1	0.190099	8.33904	1.11538	0.290915	0.380908
L2-7_01341	L2-7_01341	0.190111	4.82505	0.934856	0.333604	0.425471
L2-7_01588	rnz	0.190371	6.12276	0.825657	0.363531	0.456369
L2-7_02243	yabJ	0.190376	6.068	1.41333	0.234504	0.321153
L2-7_01707	L2-7_01707	0.190942	7.8241	1.97298	0.160132	0.237255
L2-7_00867	soj_1	0.192596	2.28301	0.508194	0.475922	0.568879
L2-7_01274	rplP	0.194388	9.77587	0.34575	0.556529	0.641726
L2-7_01276	rplV	0.19454	9.68327	0.342865	0.55818	0.643365
L2-7_02250	lrp	0.194746	5.14377	2.58087	0.108162	0.172199
L2-7_01191	hcnC	0.195613	1.29724	0.447437	0.503555	0.594339
L2-7_00776	pnuC	0.196744	5.80803	2.6374	0.104374	0.167405
L2-7_01052	thyA1	0.196798	5.50591	1.32601	0.249517	0.336451
L2-7_01354	glmM	0.197964	8.83684	2.00628	0.156649	0.232855
L2-7_00904	L2-7_00904	0.198035	2.87134	0.656672	0.417737	0.512478
L2-7_03080	L2-7_03080	0.198642	5.75285	0.287092	0.59209	0.673857
L2-7_01863	apeA	0.198968	8.02953	1.98157	0.159225	0.236182
L2-7_02765	L2-7_02765	0.199138	3.52292	1.41935	0.23351	0.319948
L2-7_02478	soxS_2	0.199261	5.81596	1.55125	0.21295	0.298343
L2-7_02679	L2-7_02679	0.19947	2.25192	0.812604	0.367351	0.460958
L2-7_01586	L2-7_01586	0.199499	5.33858	1.33929	0.247159	0.334237
L2-7_01265	rplR	0.200553	10.1363	0.405952	0.524031	0.614109
L2-7_01858	L2-7_01858	0.200996	5.17552	0.526074	0.468262	0.561193
L2-7_02122	L2-7_02122	0.201039	4.38289	1.14648	0.284286	0.373801
L2-7_00190	cysS	0.202276	7.99923	1.26914	0.259928	0.347149
L2-7_01245	pepF1	0.202841	6.79374	1.83381	0.175678	0.255449
L2-7_00905	L2-7_00905	0.203689	2.3896	0.579288	0.446591	0.540676
L2-7_01131	trkG	0.204173	6.91271	3.08335	0.0790975	0.131923
L2-7_02910	uvrA	0.204727	8.84313	1.63437	0.2011	0.28539
L2-7_01387	L2-7_01387	0.205182	6.9259	1.02164	0.31213	0.40211
L2-7_02545	L2-7_02545	0.206191	5.93162	3.1401	0.0763889	0.128322
L2-7_00624	L2-7_00624	0.206657	5.72966	2.05759	0.151449	0.227539
L2-7_00764	prkC_1	0.2074	0.0847619	0.256183	0.612754	0.692035
L2-7_02924	L2-7_02924	0.207412	4.93543	0.392117	0.531189	0.619647
L2-7_00720	L2-7_00720	0.207463	4.71972	2.10684	0.146642	0.222103
L2-7_00161	L2-7_00161	0.208373	7.28563	2.52514	0.112045	0.177674
L2-7_00540	ribE	0.208873	9.94902	1.45058	0.228435	0.314378
L2-7_01704	engB	0.209067	6.32109	1.70179	0.192054	0.274559
L2-7_01762	niaR	0.20995	5.18822	2.51733	0.112601	0.178354
L2-7_00969	L2-7_00969	0.210964	4.21293	1.87112	0.171346	0.25044
L2-7_02053	ecfA2	0.211301	7.8602	0.70978	0.399517	0.493583
L2-7_01256	L2-7_01256	0.211543	3.83305	1.33509	0.247901	0.334918
L2-7_01258	L2-7_01258	0.212233	5.76945	2.94196	0.0863061	0.142086
L2-7_02624	L2-7_02624	0.212364	3.3654	0.478601	0.489057	0.580159
L2-7_01500	hacA	0.215679	8.74913	1.26928	0.259902	0.347149
L2-7_01197	L2-7_01197	0.21635	5.21779	0.121295	0.727634	0.787801
L2-7_00045	mutL	0.217711	6.04953	0.9966	0.318135	0.40853
L2-7_01124	smc_1	0.218319	5.13115	0.443835	0.505277	0.595619
L2-7_00265	L2-7_00265	0.218887	4.16841	1.05777	0.303725	0.393998
L2-7_00364	folP	0.220215	5.49243	2.40926	0.12062	0.189025
L2-7_00353	metH_1	0.221017	7.46867	2.8134	0.09348	0.151668
L2-7_01622	yocH	0.221335	7.09943	1.41008	0.235044	0.321708
L2-7_00009	pyrC	0.222099	7.64282	1.9316	0.164584	0.242335
L2-7_02680	L2-7_02680	0.222541	3.56387	1.68667	0.194041	0.277116
L2-7_00647	L2-7_00647	0.222745	7.46934	1.4913	0.222015	0.308866
L2-7_00906	L2-7_00906	0.226151	2.71681	0.988167	0.320191	0.410794
L2-7_01279	rplW	0.227329	9.7596	0.553114	0.457048	0.551054
L2-7_00140	hpdB	0.227898	3.18456	1.12142	0.289613	0.379558
L2-7_01192	bdhA	0.228073	1.3742	0.713438	0.398305	0.49252
L2-7_01770	nnr	0.229415	6.45223	1.88068	0.170257	0.249378
L2-7_00903	L2-7_00903	0.229516	3.64073	0.908856	0.340418	0.431998
L2-7_02986	L2-7_02986	0.231456	13.0939	0.839901	0.359425	0.451821
L2-7_00338	L2-7_00338	0.232523	6.20172	2.13303	0.144156	0.219021
L2-7_00862	eno_1	0.232643	3.8556	0.286614	0.592399	0.673934
L2-7_02300	L2-7_02300	0.233995	3.55682	0.420191	0.516842	0.607972
L2-7_01736	L2-7_01736	0.234651	8.03086	2.49768	0.114014	0.180286
L2-7_02731	thrS	0.235346	9.38926	1.50441	0.219994	0.306678
L2-7_00553	toxA_1	0.236247	4.11021	0.860269	0.353663	0.445578
L2-7_02012	yncF	0.236276	6.21062	2.27678	0.131324	0.203186
L2-7_02388	ligA	0.237599	8.86579	1.82701	0.176482	0.256351
L2-7_02957	L2-7_02957	0.237625	6.95968	1.46369	0.226344	0.31273
L2-7_00169	L2-7_00169	0.238155	4.78053	1.39749	0.237144	0.323529
L2-7_02727	L2-7_02727	0.239433	2.35614	1.12526	0.28879	0.378833
L2-7_02851	dhaS	0.239468	4.29193	1.64719	0.199342	0.283387
L2-7_01223	dnaX_2	0.239676	8.95639	2.27795	0.131225	0.203145
L2-7_02311	hin	0.239944	3.21988	1.50973	0.219181	0.306001
L2-7_00156	mtaB	0.240234	6.04318	1.58814	0.207592	0.292151
L2-7_00394	L2-7_00394	0.24092	0.45481	0.257683	0.611717	0.691141
L2-7_02491	L2-7_02491	0.242511	6.38315	2.60656	0.106423	0.170106
L2-7_00656	tadA_1	0.243552	4.69106	3.50225	0.0612855	0.106264
L2-7_01275	rpsC	0.243768	10.4279	0.495264	0.481589	0.574374
L2-7_01337	pbpB	0.243776	6.25416	1.43333	0.231221	0.317123
L2-7_01228	L2-7_01228	0.243996	4.7299	0.921187	0.337163	0.428644
L2-7_01417	L2-7_01417	0.245178	4.06052	1.63394	0.201158	0.28539
L2-7_00275	L2-7_00275	0.245477	1.11789	0.707939	0.400129	0.493903
L2-7_02978	siaP_2	0.245838	6.44434	1.06281	0.302576	0.393054
L2-7_00828	cph2_1	0.247244	7.57755	3.00935	0.0827853	0.136933
L2-7_01068	rnr	0.24862	6.93212	3.84485	0.0498989	0.0892257
L2-7_01900	lytR_1	0.24877	8.21594	3.86993	0.0491587	0.0880145
L2-7_01979	glnP	0.248814	10.9351	2.0079	0.156481	0.232729
L2-7_00217	guaB	0.249178	9.55745	0.978634	0.322536	0.413614
L2-7_03057	L2-7_03057	0.254131	3.45802	1.91581	0.16632	0.244121
L2-7_01119	thiN	0.255179	7.21385	2.75695	0.0968327	0.156474
L2-7_01940	L2-7_01940	0.255986	6.21628	2.96811	0.0849208	0.140052
L2-7_01000	hom_1	0.258274	6.80315	0.794444	0.37276	0.467099
L2-7_02490	L2-7_02490	0.258481	5.27451	2.30148	0.129251	0.200755
L2-7_00311	ycfH_1	0.258616	4.23747	1.055	0.304359	0.394639
L2-7_00303	L2-7_00303	0.260084	3.26111	1.56374	0.211119	0.296073
L2-7_01253	L2-7_01253	0.260106	4.20912	1.62121	0.202923	0.287311
L2-7_02082	L2-7_02082	0.260527	8.22479	2.50467	0.113509	0.17959
L2-7_02537	ytrB	0.261361	5.53359	0.110395	0.739695	0.79747
L2-7_02757	glmS	0.261459	9.97609	2.44228	0.118104	0.185568
L2-7_02584	L2-7_02584	0.262818	5.80239	1.58041	0.208702	0.293271
L2-7_02850	L2-7_02850	0.264214	7.45118	2.24064	0.134425	0.206956
L2-7_01623	L2-7_01623	0.264874	6.71205	3.96095	0.0465675	0.0842364
L2-7_02192	dhaT	0.265849	5.08365	2.5851	0.107874	0.171838
L2-7_00325	L2-7_00325	0.266974	1.06944	0.25867	0.611035	0.690929
L2-7_01255	L2-7_01255	0.267201	4.99144	2.67105	0.102189	0.164276
L2-7_01028	scpB	0.267785	5.98926	1.76824	0.183601	0.264634
L2-7_00750	L2-7_00750	0.268557	4.08546	1.15243	0.283042	0.37269
L2-7_01590	ispD	0.268668	5.60316	2.33459	0.126528	0.197291
L2-7_00988	L2-7_00988	0.268687	6.75384	1.17413	0.278553	0.367987
L2-7_01689	hcp_2	0.269027	6.22878	0.863538	0.35275	0.444827
L2-7_02432	mepA_13	0.269607	6.03978	2.9867	0.0839513	0.13878
L2-7_03019	L2-7_03019	0.272288	7.91029	2.60922	0.106244	0.169964
L2-7_02131	yehU_3	0.274397	7.96096	4.24608	0.039341	0.07344
L2-7_01240	L2-7_01240	0.274418	6.78817	3.40051	0.0651762	0.112246
L2-7_01414	bvgS_1	0.274694	4.42652	2.09474	0.147807	0.223024
L2-7_02588	L2-7_02588	0.27473	1.71518	0.855656	0.354957	0.446806
L2-7_01903	L2-7_01903	0.275622	5.92062	1.81268	0.178187	0.258593
L2-7_00582	L2-7_00582	0.276008	5.83608	2.44677	0.117767	0.18528
L2-7_02985	L2-7_02985	0.276085	12.8624	1.75035	0.185832	0.267301
L2-7_02977	siaT_2	0.27667	5.80477	1.75359	0.185426	0.266854
L2-7_01790	ffh	0.27715	7.58339	2.53715	0.111195	0.176526
L2-7_01112	def_1	0.27879	6.00835	6.25339	0.0123956	0.0266353
L2-7_02527	murR_2	0.278929	4.44709	2.10581	0.146741	0.222133
L2-7_00139	hpdA	0.279547	4.2891	1.65129	0.198783	0.28288
L2-7_01047	recX	0.279929	6.09528	3.9997	0.0455084	0.0831938
L2-7_01688	L2-7_01688	0.281083	3.57153	1.32967	0.248864	0.335895
L2-7_00801	cobD	0.28174	5.53324	3.28073	0.0700976	0.119183
L2-7_01687	L2-7_01687	0.28299	3.51566	2.65734	0.103073	0.165602
L2-7_01054	hslO	0.283664	5.58431	4.62796	0.031455	0.0603678
L2-7_01997	rpoA	0.284338	11.0987	1.67925	0.195024	0.278237
L2-7_02875	L2-7_02875	0.285361	5.35594	2.47951	0.115339	0.18197
L2-7_00984	murR_1	0.285787	7.3323	1.16366	0.280707	0.370138
L2-7_00625	rsmI	0.286456	6.02292	4.14944	0.0416484	0.0771817
L2-7_01029	scpA	0.287512	5.5397	2.03832	0.153379	0.229296
L2-7_00560	L2-7_00560	0.287657	4.8003	0.261239	0.60927	0.689211
L2-7_00606	pdaA	0.287784	2.57229	2.23445	0.134965	0.207672
L2-7_02363	L2-7_02363	0.288425	2.02619	1.60289	0.205494	0.289926
L2-7_01453	gltC	0.28851	7.03743	5.08779	0.0240949	0.0477805
L2-7_02048	glcR	0.288568	1.96597	0.919415	0.337629	0.429041
L2-7_01732	L2-7_01732	0.288648	6.59204	2.37095	0.123612	0.193174
L2-7_00367	ltaS_1	0.289658	7.08994	4.0175	0.0450303	0.0824673
L2-7_02011	L2-7_02011	0.290758	7.20439	6.93699	0.00844309	0.0189868
L2-7_00366	pheA	0.290758	5.74497	3.60999	0.0574336	0.100644
L2-7_02258	L2-7_02258	0.290814	2.41311	1.37606	0.240773	0.327499
L2-7_02542	yrbG_3	0.29103	7.10493	0.686474	0.407366	0.500852
L2-7_02064	regX3	0.292614	2.81706	1.36831	0.242103	0.328787
L2-7_00722	L2-7_00722	0.2936	2.47576	1.96968	0.160482	0.237482
L2-7_01145	recN	0.293917	7.35353	5.41993	0.0199081	0.0404808
L2-7_00591	cysD_1	0.295102	7.34104	2.43277	0.118823	0.186417
L2-7_00554	L2-7_00554	0.295174	5.16102	2.32016	0.127707	0.198576
L2-7_01121	ychF	0.297537	8.0428	1.83391	0.175666	0.255449
L2-7_00368	gppA	0.299041	6.75393	6.09893	0.0135264	0.0286694
L2-7_02716	L2-7_02716	0.299176	4.46517	2.11454	0.145906	0.221228
L2-7_01991	map_2	0.299594	6.68846	2.15829	0.141803	0.215941
L2-7_01326	L2-7_01326	0.30044	5.84027	1.40812	0.235369	0.321866
L2-7_00619	L2-7_00619	0.301082	3.0708	1.22497	0.268388	0.356916
L2-7_01007	purH	0.301456	8.46329	3.77103	0.0521476	0.0925966
L2-7_02323	L2-7_02323	0.302185	0.352053	0.400657	0.52675	0.616229
L2-7_02364	L2-7_02364	0.302275	1.01898	1.0944	0.295498	0.385288
L2-7_01897	rplJ	0.304348	11.7036	1.73594	0.187654	0.269368
L2-7_02206	L2-7_02206	0.305739	0.864066	1.09677	0.294976	0.384787
L2-7_00987	recJ	0.310898	7.74194	1.82858	0.176295	0.256213
L2-7_00933	rluC_1	0.310925	7.93374	3.13912	0.076435	0.128323
L2-7_02063	phoR_4	0.311924	4.68512	1.8439	0.174495	0.254256
L2-7_01546	L2-7_01546	0.312145	6.27269	1.11239	0.291563	0.381578
L2-7_02365	L2-7_02365	0.312788	1.25356	1.06921	0.301125	0.391351
L2-7_00446	L2-7_00446	0.313067	2.03557	1.5447	0.21392	0.299552
L2-7_00611	L2-7_00611	0.313345	0.809539	0.853799	0.35548	0.447263
L2-7_02599	L2-7_02599	0.313502	5.22903	0.951843	0.329251	0.420684
L2-7_01516	carB	0.313541	9.43111	1.15474	0.282559	0.372229
L2-7_00008	L2-7_00008	0.314627	8.81746	3.06789	0.0798533	0.132946
L2-7_00493	L2-7_00493	0.31466	8.59006	3.38338	0.0658568	0.113279
L2-7_00513	L2-7_00513	0.316546	4.00632	3.25082	0.0713878	0.121156
L2-7_02974	nagA	0.317076	5.13981	2.93362	0.0867526	0.142737
L2-7_00412	thiG	0.317784	2.9327	2.41004	0.120559	0.189025
L2-7_01136	mepA_4	0.318114	3.22241	1.58725	0.20772	0.292185
L2-7_00713	L2-7_00713	0.318603	4.02102	4.11118	0.0426006	0.0784793
L2-7_01754	tilS	0.318805	6.01739	3.60693	0.0575392	0.100766
L2-7_00832	L2-7_00832	0.320898	6.02086	6.88683	0.0086833	0.0194489
L2-7_01961	L2-7_01961	0.321004	2.83601	0.929972	0.33487	0.426309
L2-7_00481	gatD	0.321234	2.54031	2.34398	0.125767	0.196214
L2-7_01412	rpfC_2	0.321744	6.22054	2.55049	0.11026	0.175141
L2-7_02929	L2-7_02929	0.322508	5.43261	4.3274	0.0375036	0.0704323
L2-7_02720	rpfC_4	0.324562	6.1112	3.8155	0.0507803	0.0905706
L2-7_02549	uvrY	0.325399	3.10106	2.18766	0.139121	0.21255
L2-7_00002	L2-7_00002	0.325478	4.55685	4.81481	0.0282162	0.0547519
L2-7_02494	gatA	0.325726	8.3718	3.02415	0.0820333	0.13593
L2-7_00721	tipA	0.325916	4.61773	3.64094	0.0563751	0.0989743
L2-7_02954	rsmE	0.326196	6.70131	5.62805	0.0176753	0.03647
L2-7_01515	glnA_2	0.327896	8.8412	1.31874	0.250818	0.337718
L2-7_00225	mepA_1	0.329045	6.4229	2.24466	0.134076	0.206533
L2-7_01194	aguA	0.330727	0.798732	1.09855	0.294586	0.384636
L2-7_01214	L2-7_01214	0.330919	0.125569	0.56906	0.450633	0.544135
L2-7_01580	L2-7_01580	0.330936	10.1888	1.94505	0.163121	0.240561
L2-7_01700	tig_2	0.332829	10.7124	1.83585	0.175438	0.255366
L2-7_01517	carA	0.334325	7.67881	1.47009	0.225331	0.311945
L2-7_02021	L2-7_02021	0.335825	2.92058	1.25335	0.262913	0.350968
L2-7_01731	paaK	0.336297	5.36179	3.1543	0.0757271	0.127516
L2-7_01814	argG	0.336337	9.00759	2.29361	0.129908	0.201551
L2-7_02976	L2-7_02976	0.336442	3.73803	2.83728	0.0920998	0.149689
L2-7_02423	L2-7_02423	0.337412	0.907107	1.32384	0.249904	0.336811
L2-7_02389	rluF	0.33849	6.61077	4.92127	0.026528	0.051799
L2-7_00769	rpsR	0.339434	9.31455	1.44199	0.229817	0.315971
L2-7_00365	sulD	0.340035	5.53848	4.63993	0.0312363	0.0599892
L2-7_01107	gmk	0.341861	7.36581	6.89268	0.00865493	0.0194164
L2-7_00941	murAB	0.342969	7.74742	5.28112	0.0215579	0.0433635
L2-7_02688	aspS_2	0.343499	9.34724	4.5747	0.0324475	0.0620599
L2-7_00213	glnS	0.344219	9.10671	3.50518	0.0611774	0.106142
L2-7_02424	L2-7_02424	0.344863	7.64422	6.94032	0.00842739	0.0189868
L2-7_03031	L2-7_03031	0.346282	3.23605	1.27856	0.258168	0.345621
L2-7_02860	fsaA	0.349919	5.71653	6.31497	0.0119723	0.0258645
L2-7_01489	L2-7_01489	0.352648	7.26509	3.96209	0.046536	0.0842364
L2-7_00664	L2-7_00664	0.352706	6.1944	4.37956	0.0363724	0.0685166
L2-7_00017	L2-7_00017	0.352752	6.43215	9.04436	0.00263506	0.00681129
L2-7_00287	L2-7_00287	0.354394	2.09977	1.96928	0.160525	0.237482
L2-7_02604	basR	0.354818	8.45797	2.68516	0.101287	0.163014
L2-7_00705	phnX	0.356232	1.32291	1.99329	0.157997	0.234609
L2-7_01369	L2-7_01369	0.358153	6.93006	5.99475	0.0143485	0.0302744
L2-7_02096	pgsA_2	0.358279	0.374259	1.00962	0.314995	0.405055
L2-7_01280	rplD	0.358779	10.1178	1.49065	0.222115	0.308866
L2-7_00640	nrdD	0.358943	8.36341	3.93621	0.0472571	0.0852123
L2-7_02812	L2-7_02812	0.359985	5.28361	5.45409	0.0195225	0.0398703
L2-7_00259	L2-7_00259	0.360287	6.36047	7.23546	0.00714775	0.0164122
L2-7_02520	L2-7_02520	0.361551	4.08412	1.3967	0.237277	0.323529
L2-7_00623	L2-7_00623	0.365743	5.80543	4.78389	0.0287271	0.0556278
L2-7_01315	L2-7_01315	0.36589	2.61298	2.18118	0.139707	0.213329
L2-7_01257	L2-7_01257	0.366041	4.27034	4.88323	0.0271188	0.0527687
L2-7_00724	yxlG	0.366735	4.51584	3.93614	0.047259	0.0852123
L2-7_02612	rnhA	0.367038	3.47023	4.26186	0.0389773	0.0728097
L2-7_00612	L2-7_00612	0.36718	4.84489	4.29979	0.038117	0.0713452
L2-7_00006	purM	0.367982	9.46461	3.2039	0.0734629	0.124077
L2-7_01896	rplL	0.368128	10.1271	1.78156	0.181957	0.262806
L2-7_02743	L2-7_02743	0.368706	3.21101	2.68675	0.101186	0.162945
L2-7_00773	hisA	0.368934	5.06835	9.15257	0.0024837	0.00646176
L2-7_00544	L2-7_00544	0.369518	7.15525	7.49573	0.00618455	0.0144069
L2-7_00159	L2-7_00159	0.369664	6.25747	6.38247	0.0115253	0.0250534
L2-7_01456	L2-7_01456	0.372355	3.72688	1.2748	0.258868	0.346394
L2-7_00833	rlmH_1	0.372648	4.96696	7.84644	0.00509209	0.012143
L2-7_02803	L2-7_02803	0.373259	-0.160812	0.619898	0.431085	0.524946
L2-7_03037	L2-7_03037	0.375799	3.61662	3.72574	0.0535799	0.0947066
L2-7_03032	L2-7_03032	0.376954	3.8973	1.62268	0.202718	0.287167
L2-7_01840	L2-7_01840	0.377073	3.91646	5.73549	0.0166254	0.0345325
L2-7_00800	L2-7_00800	0.377133	5.17791	4.5695	0.0325461	0.0622061
L2-7_01998	rplQ	0.377311	10.1241	2.59738	0.107041	0.170899
L2-7_02526	metF	0.37831	5.7281	5.46369	0.0194156	0.0396808
L2-7_02016	rplA	0.379797	11.8977	3.52794	0.0603426	0.105019
L2-7_00510	dnaC_1	0.382892	8.04017	5.35823	0.0206247	0.0418165
L2-7_01503	DmdB	0.383163	6.21068	3.15151	0.0758566	0.127658
L2-7_00960	rpe	0.383327	7.73731	10.2178	0.00139088	0.00388635
L2-7_01482	srpC_2	0.383434	5.26745	2.23028	0.13533	0.207777
L2-7_00482	araB_1	0.383862	2.8728	3.75989	0.0524961	0.093102
L2-7_00281	L2-7_00281	0.384056	0.753875	1.45453	0.227803	0.313855
L2-7_02396	tagG	0.384089	6.12718	4.50178	0.0338596	0.0643691
L2-7_02881	cls_2	0.386182	1.98374	3.35989	0.0668026	0.114554
L2-7_01999	ykoD_3	0.387017	4.42314	2.80355	0.0940558	0.152426
L2-7_02320	mdeA_4	0.387795	5.8326	2.97677	0.0844676	0.139469
L2-7_01963	mdeA_3	0.38879	8.05868	3.10997	0.0778144	0.130093
L2-7_00723	yxlF_1	0.391229	4.92352	4.86659	0.0273816	0.0531692
L2-7_00010	L2-7_00010	0.39139	8.15219	7.13029	0.00757924	0.017294
L2-7_00361	glyQS	0.391848	9.86601	4.59146	0.0321316	0.0615398
L2-7_00971	L2-7_00971	0.394913	4.95746	4.28246	0.0385075	0.072028
L2-7_02683	potD_3	0.395484	5.19151	3.88054	0.0488488	0.0876275
L2-7_02313	mepA_11	0.396028	5.00227	3.8663	0.0492649	0.0881483
L2-7_02412	ydeH	0.396285	5.5189	8.64874	0.00327288	0.00821739
L2-7_01106	L2-7_01106	0.396297	5.88606	8.35815	0.00383961	0.00943499
L2-7_00834	spoVB	0.39634	6.78174	11.1072	0.000859944	0.00250214
L2-7_03020	L2-7_03020	0.396393	6.87878	4.37732	0.0364202	0.0685355
L2-7_02459	rpsG	0.397076	11.3114	2.59424	0.107253	0.171141
L2-7_02498	L2-7_02498	0.398001	3.51118	4.24159	0.0394453	0.0735857
L2-7_02013	L2-7_02013	0.39868	9.50113	3.93084	0.0474082	0.0853713
L2-7_02295	L2-7_02295	0.399644	6.23007	1.83674	0.175334	0.255346
L2-7_01860	coaE	0.399861	5.24157	8.86022	0.00291452	0.00747437
L2-7_02173	ssb_4	0.400284	0.501043	1.12443	0.288967	0.378889
L2-7_02310	gltP	0.400782	4.94278	3.97239	0.0462522	0.0840204
L2-7_02460	fusA	0.401359	13.2039	2.60879	0.106273	0.169964
L2-7_00279	L2-7_00279	0.402136	0.0817021	0.957464	0.327827	0.419566
L2-7_01567	L2-7_01567	0.403859	1.60436	2.27048	0.131859	0.203901
L2-7_02715	rpmE	0.403913	8.57997	3.58724	0.058225	0.101839
L2-7_00372	purB	0.406456	9.62621	5.16106	0.0230988	0.0460334
L2-7_00785	recQ	0.407658	5.75901	7.23353	0.00715545	0.0164122
L2-7_02587	L2-7_02587	0.407953	4.01722	5.02191	0.0250285	0.0493525
L2-7_01241	epsH_2	0.408944	4.2886	3.20768	0.0732936	0.123865
L2-7_01242	L2-7_01242	0.409895	1.09977	1.5885	0.20754	0.292151
L2-7_02745	L2-7_02745	0.410656	4.98095	7.80667	0.00520538	0.0123711
L2-7_00772	L2-7_00772	0.41147	4.64465	8.17542	0.00424619	0.010328
L2-7_01861	polA	0.412348	7.46489	9.75371	0.00178961	0.00487317
L2-7_02684	ydcV_3	0.41339	4.96835	3.71097	0.054056	0.0954411
L2-7_00326	L2-7_00326	0.41356	3.45343	0.731923	0.39226	0.485904
L2-7_01746	spoVT	0.414815	5.45479	8.55727	0.00344145	0.0086021
L2-7_02853	cph2_3	0.414868	5.75915	5.24187	0.0220496	0.0441306
L2-7_00005	purN	0.415646	8.85406	5.45111	0.0195558	0.0399093
L2-7_01454	L2-7_01454	0.416034	3.3589	1.05895	0.303454	0.39383
L2-7_02159	fnr	0.417416	4.27796	1.70273	0.191931	0.274523
L2-7_01544	pnp	0.417649	9.29688	1.95575	0.161969	0.239365
L2-7_01176	lacA_2	0.418393	5.3277	3.656	0.0558677	0.0982682
L2-7_02251	L2-7_02251	0.418492	5.99144	9.47249	0.00208577	0.00555016
L2-7_02202	L2-7_02202	0.418614	3.99008	5.98293	0.014445	0.0304551
L2-7_02403	murD	0.418841	7.1959	7.42858	0.0064196	0.0148815
L2-7_02015	rplK	0.419339	10.9193	5.07112	0.0243277	0.0481399
L2-7_01403	L2-7_01403	0.419663	8.08217	7.09651	0.00772341	0.0175552
L2-7_02452	L2-7_02452	0.41993	10.8307	5.01406	0.0251423	0.0494724
L2-7_00220	ilvD	0.420948	9.98209	4.11592	0.0424815	0.0783114
L2-7_00426	L2-7_00426	0.42127	1.17362	1.7772	0.182494	0.26331
L2-7_02036	ftsW_2	0.423571	5.69622	7.29804	0.006903	0.0159195
L2-7_03041	L2-7_03041	0.423633	4.74043	3.22124	0.0726886	0.122991
L2-7_00551	srrA_1	0.423772	6.89164	1.43953	0.230215	0.316362
L2-7_00592	cysNC	0.423953	9.13706	5.89932	0.0151467	0.0316961
L2-7_01576	ssuC_3	0.424505	2.38888	1.74248	0.186824	0.268324
L2-7_01769	ndoA_2	0.4246	4.45679	4.78153	0.0287666	0.0556658
L2-7_01788	L2-7_01788	0.424816	8.28476	2.79195	0.094739	0.153413
L2-7_02925	L2-7_02925	0.425272	5.21902	2.92416	0.0872626	0.143226
L2-7_02499	L2-7_02499	0.425443	0.260442	1.02872	0.310459	0.40051
L2-7_00298	L2-7_00298	0.425518	5.34962	1.71436	0.190421	0.272788
L2-7_02014	L2-7_02014	0.426083	11.0768	4.72994	0.0296419	0.0572804
L2-7_00044	miaA	0.426629	4.89994	5.43243	0.0197662	0.0402506
L2-7_00508	murC	0.427298	8.52031	6.88912	0.0086722	0.0194396
L2-7_01703	lon1_1	0.427836	7.73469	5.26994	0.0216968	0.043549
L2-7_02953	L2-7_02953	0.428616	0.999042	1.24325	0.264846	0.353044
L2-7_00350	L2-7_00350	0.430622	5.24756	7.12841	0.00758718	0.017298
L2-7_00391	rpsB	0.431978	11.1843	5.33731	0.0208736	0.0421991
L2-7_02772	L2-7_02772	0.433703	4.27774	4.44907	0.0349204	0.0662022
L2-7_01607	L2-7_01607	0.43393	6.83747	3.26448	0.0707957	0.120224
L2-7_02431	L2-7_02431	0.434442	5.38764	6.77396	0.00924976	0.0205371
L2-7_01018	tagB_2	0.43572	5.5341	3.7337	0.0533252	0.0943886
L2-7_02065	L2-7_02065	0.435727	3.38075	0.882443	0.347533	0.439039
L2-7_01747	L2-7_01747	0.436149	7.52616	3.92012	0.0477114	0.0858622
L2-7_00503	mfd	0.437108	7.82643	7.49548	0.0061854	0.0144069
L2-7_02181	rplI	0.437318	6.59544	6.63475	0.0100008	0.0220474
[truncated: 803 more rows]

## Sheet: Table S7. DEG A.s. L2-7;G vs GL
Locus ID	Gene Name	logFC	logCPM	LR	PValue	FDR
L2-7_02157	glpF_1	-9.62606	7.57356	327.722	3.01e-73	4.22e-70
L2-7_02158	L2-7_02158	-9.02235	7.70608	335.373	6.49e-75	1.82e-71
L2-7_01905	lctE	-4.34794	13.2837	75.5448	3.57e-18	1.43e-15
L2-7_01908	lctC	-3.70036	13.9951	26.0823	3.27e-07	7.64e-05
L2-7_01906	lctD	-3.69602	14.0668	28.0838	1.16e-07	3.62e-05
L2-7_01909	lctG	-3.69228	14.6048	28.6718	8.57e-08	3e-05
L2-7_01910	lctF	-3.54014	14.8201	26.791	2.27e-07	5.77e-05
L2-7_01907	lctB	-3.48847	13.6473	20.5738	5.74e-06	0.00100481
L2-7_02156	L2-7_02156	-3.18331	4.00238	148.74	3.27e-34	1.83e-31
L2-7_03058	L2-7_03058	-2.7336	15.8205	5.38022	0.0203663	0.356666
L2-7_00402	purE_2	-2.71471	7.4043	250.688	1.84e-56	1.72e-53
L2-7_00403	L2-7_00403	-2.66469	8.29909	181.664	2.1e-41	1.47e-38
L2-7_03061	L2-7_03061	-2.28094	2.56172	4.00492	0.0453676	0.447606
L2-7_03079	L2-7_03079	-2.16668	2.28906	3.35773	0.0668901	0.506122
L2-7_03073	L2-7_03073	-2.0956	2.46292	4.02145	0.0449252	0.447481
L2-7_01981	L2-7_01981	-2.06865	6.11451	16.7946	4.17e-05	0.00507421
L2-7_00522	L2-7_00522	-2.01012	3.03245	109.076	1.56e-25	7.29e-23
L2-7_01366	L2-7_01366	-1.96932	7.74343	6.24676	0.0124421	0.29732
L2-7_03052	L2-7_03052	-1.96596	6.03259	9.15031	0.00248676	0.153653
L2-7_01367	ydfJ	-1.93388	6.43789	7.41643	0.00646309	0.230515
L2-7_03070	L2-7_03070	-1.86123	-0.0711698	3.20903	0.0732327	0.512995
L2-7_01679	thrZ	-1.77294	8.596	20.7273	5.3e-06	0.000989231
L2-7_01828	hrcA	-1.68101	12.468	3.22776	0.0723998	0.512283
L2-7_02649	L2-7_02649	-1.54327	1.29087	11.4294	0.000722896	0.068625
L2-7_02903	L2-7_02903	-1.50057	2.02312	4.52074	0.0334864	0.415999
L2-7_02500	L2-7_02500	-1.40775	0.889419	3.90325	0.0481929	0.458515
L2-7_03024	L2-7_03024	-1.39829	0.308978	4.28648	0.0384166	0.437574
L2-7_00405	potA_1	-1.25866	-0.289859	11.3992	0.000734743	0.068625
L2-7_01368	yvdT	-1.18846	5.02979	7.12834	0.00758749	0.241592
L2-7_00727	L2-7_00727	-1.15026	11.4292	2.75247	0.0971041	0.54862
L2-7_02849	L2-7_02849	-1.13981	2.52771	5.32028	0.0210787	0.364583
L2-7_02648	L2-7_02648	-1.13418	3.45115	5.95815	0.0146494	0.318198
L2-7_00726	ybhF_2	-1.13276	12.082	2.67632	0.101851	0.552974
L2-7_00333	cstA	-1.13006	6.59769	4.30442	0.0380135	0.43475
L2-7_00711	L2-7_00711	-1.11806	-0.16013	2.73169	0.0983752	0.54862
L2-7_01030	glgB_3	-1.06516	8.23824	4.82412	0.0280641	0.393178
L2-7_02160	L2-7_02160	-1.0263	7.11969	27.3727	1.68e-07	4.7e-05
L2-7_01026	egsA_2	-1.0074	5.21885	4.33846	0.0372607	0.427887
L2-7_02084	ylaC	-0.99661	4.71691	8.25255	0.00406949	0.186456
L2-7_00225	mepA_1	-0.988766	6.4229	20.258	6.77e-06	0.00105339
L2-7_02542	yrbG_3	-0.985654	7.10493	7.7744	0.00529918	0.212428
L2-7_00725	L2-7_00725	-0.951414	11.2273	1.95893	0.161628	0.616723
L2-7_02578	L2-7_02578	-0.936826	0.546516	3.63833	0.0564636	0.489321
L2-7_02642	L2-7_02642	-0.927413	4.54007	2.45823	0.11691	0.564667
L2-7_02831	L2-7_02831	-0.913006	2.79175	4.66433	0.0307955	0.408953
L2-7_02856	L2-7_02856	-0.912097	-0.0380528	8.40309	0.00374584	0.180963
L2-7_01982	L2-7_01982	-0.909389	8.93202	17.7633	2.5e-05	0.00333794
L2-7_00224	mscS	-0.908449	6.07291	23.6517	1.15e-06	0.000248826
L2-7_02984	ltrA_4	-0.900895	4.90769	2.59069	0.107494	0.553984
L2-7_01184	ydcV_2	-0.897174	1.06284	10.581	0.00114253	0.0941581
L2-7_00074	L2-7_00074	-0.894158	2.45207	1.13443	0.286832	0.684501
L2-7_02317	L2-7_02317	-0.891276	0.386259	4.13309	0.0420526	0.447481
L2-7_00520	L2-7_00520	-0.887404	7.95964	18.7312	1.5e-05	0.00221946
L2-7_02193	davT	-0.886817	2.73014	3.68095	0.0550375	0.485457
L2-7_00519	L2-7_00519	-0.885973	7.72566	17.338	3.13e-05	0.00398474
L2-7_00729	L2-7_00729	-0.881907	6.76975	4.46159	0.0346652	0.417564
L2-7_02085	L2-7_02085	-0.876118	6.49776	8.53179	0.00348997	0.174623
L2-7_02436	ywaC_2	-0.867688	8.36425	1.68868	0.193775	0.643488
L2-7_00386	comM	-0.859053	3.72018	7.08373	0.0077787	0.244898
L2-7_00728	L2-7_00728	-0.840878	7.65422	3.27972	0.0701407	0.506122
L2-7_01880	L2-7_01880	-0.833593	3.97648	2.28826	0.130356	0.583479
L2-7_02040	lytR_2	-0.824931	4.80956	13.3151	0.000263283	0.0307383
L2-7_00088	L2-7_00088	-0.811403	1.75741	0.830176	0.362222	0.731755
L2-7_01797	L2-7_01797	-0.803917	1.25653	3.60351	0.0576576	0.489321
L2-7_01125	L2-7_01125	-0.802765	4.04877	6.62278	0.0100683	0.278032
L2-7_01831	dnaJ_1	-0.793624	8.85855	2.95572	0.0855743	0.533746
L2-7_01833	gpr	-0.781158	1.39311	1.76727	0.18372	0.63953
L2-7_01832	prmA	-0.780672	9.1992	2.57819	0.108345	0.553984
L2-7_00227	ycdZ	-0.774307	6.22583	20.9689	4.67e-06	0.000934271
L2-7_01505	L2-7_01505	-0.767856	5.05027	4.85565	0.0275557	0.391934
L2-7_00077	L2-7_00077	-0.75433	1.50047	0.821136	0.364848	0.733976
L2-7_00913	soxS_1	-0.752378	4.91467	11.748	0.000609093	0.0633387
L2-7_00084	L2-7_00084	-0.749026	1.44667	0.77792	0.377778	0.744398
L2-7_00173	groL	-0.746256	10.2996	1.51981	0.217649	0.656355
L2-7_00730	L2-7_00730	-0.733819	7.24611	4.84338	0.0277525	0.392739
L2-7_02039	L2-7_02039	-0.731544	2.79643	7.02504	0.00803777	0.247399
L2-7_03062	L2-7_03062	-0.724043	1.02827	1.43081	0.231632	0.6641
L2-7_01421	hcp_1	-0.722847	3.53458	10.0895	0.00149117	0.112926
L2-7_00086	L2-7_00086	-0.722753	3.57611	0.712449	0.398632	0.757266
L2-7_02641	L2-7_02641	-0.721726	1.93535	1.71729	0.190042	0.643478
L2-7_02579	L2-7_02579	-0.716285	0.661047	2.18143	0.139684	0.594901
L2-7_00085	L2-7_00085	-0.711572	3.02285	0.638122	0.424392	0.776712
L2-7_00218	L2-7_00218	-0.709342	7.01513	10.2781	0.0013462	0.107773
L2-7_00073	L2-7_00073	-0.709225	4.56598	0.814708	0.366732	0.734513
L2-7_03011	L2-7_03011	-0.70876	0.949514	1.63438	0.201099	0.644952
L2-7_00075	L2-7_00075	-0.702739	2.33358	0.645293	0.421801	0.775166
L2-7_02803	L2-7_02803	-0.699421	-0.160812	3.28794	0.0697906	0.506122
L2-7_00070	L2-7_00070	-0.699005	2.35308	0.983241	0.3214	0.709194
L2-7_02950	L2-7_02950	-0.698634	1.30206	5.73801	0.0166016	0.336526
L2-7_01124	smc_1	-0.697188	5.13115	4.55438	0.0328346	0.412568
L2-7_02407	L2-7_02407	-0.694216	-0.250783	2.93934	0.0864459	0.53431
L2-7_01193	L2-7_01193	-0.694139	0.580436	6.98619	0.00821409	0.247483
L2-7_02219	L2-7_02219	-0.693413	3.59058	2.90672	0.0882111	0.536311
L2-7_00845	L2-7_00845	-0.693378	2.74304	3.75353	0.0526961	0.484113
L2-7_00103	L2-7_00103	-0.692147	5.64216	3.09741	0.078417	0.525578
L2-7_00972	cgkA_4	-0.688532	0.172813	5.57507	0.018218	0.341968
L2-7_01830	dnaK_1	-0.688055	11.3752	1.26625	0.26047	0.676959
L2-7_02437	htpG	-0.68413	9.32143	0.93379	0.33388	0.717451
L2-7_00420	L2-7_00420	-0.682424	0.183469	4.82634	0.028028	0.393178
L2-7_01473	mdeA_2	-0.680145	3.33338	3.70137	0.0543678	0.485457
L2-7_00072	L2-7_00072	-0.677672	4.82232	0.935964	0.333318	0.717451
L2-7_02640	L2-7_02640	-0.677198	1.27812	0.93207	0.334325	0.717451
L2-7_00535	cwlD	-0.674618	4.33216	5.27792	0.0215975	0.365698
L2-7_02620	L2-7_02620	-0.67375	3.89554	4.44361	0.0350321	0.417564
L2-7_00185	cas2_1	-0.672379	3.09526	3.27334	0.0704142	0.506122
L2-7_00087	L2-7_00087	-0.668445	3.89684	0.585733	0.444074	0.783068
L2-7_01633	clpB_2	-0.665488	9.2154	0.717503	0.396964	0.755945
L2-7_01191	hcnC	-0.665232	1.29724	7.00615	0.00812301	0.247399
L2-7_02841	L2-7_02841	-0.661109	1.35486	2.79346	0.0946496	0.541241
L2-7_00648	csd	-0.659921	5.91266	3.53566	0.0600624	0.489321
L2-7_03036	L2-7_03036	-0.656291	1.08194	3.84826	0.0497976	0.466665
L2-7_00078	L2-7_00078	-0.655351	2.88499	0.692308	0.40538	0.761792
L2-7_01208	mepA_5	-0.647686	4.95403	6.17246	0.0129754	0.301722
L2-7_01983	L2-7_01983	-0.647131	7.18305	8.20327	0.00418149	0.186456
L2-7_02646	L2-7_02646	-0.646447	2.06629	1.29021	0.256008	0.676959
L2-7_02453	L2-7_02453	-0.645915	5.19687	5.40654	0.0200615	0.355773
L2-7_00172	groS	-0.644578	7.41102	1.01542	0.313609	0.707207
L2-7_01215	gerBB	-0.64246	1.69245	3.98379	0.0459401	0.448516
L2-7_00076	L2-7_00076	-0.641145	2.3641	0.682067	0.408876	0.76429
L2-7_02065	L2-7_02065	-0.63781	3.38075	1.92858	0.164913	0.618182
L2-7_02414	L2-7_02414	-0.63723	4.74242	2.49442	0.11425	0.563609
L2-7_02326	ywqN_2	-0.635196	5.90727	2.63711	0.104393	0.553984
L2-7_00898	L2-7_00898	-0.631959	0.243974	3.14566	0.0761293	0.520279
L2-7_00042	L2-7_00042	-0.629863	9.29742	3.42933	0.0640482	0.499646
L2-7_02857	L2-7_02857	-0.629198	2.29671	7.24891	0.00709439	0.236649
L2-7_00067	L2-7_00067	-0.620518	3.5491	1.35931	0.243657	0.671657
L2-7_02454	L2-7_02454	-0.617796	3.29924	2.31292	0.128302	0.577551
L2-7_02576	mobA_4	-0.617648	1.45321	2.53166	0.111582	0.560312
L2-7_02647	L2-7_02647	-0.617607	2.50525	1.46363	0.226354	0.659296
L2-7_00079	L2-7_00079	-0.615122	3.21061	0.481567	0.487713	0.81392
L2-7_00409	nfdA	-0.609395	0.283393	4.09428	0.0430286	0.447481
L2-7_00491	gltA	-0.607339	7.78379	3.72988	0.0534472	0.485457
L2-7_02658	L2-7_02658	-0.603664	2.21862	1.89989	0.16809	0.6209
L2-7_01923	pabA	-0.602554	5.66307	2.45023	0.117508	0.564667
L2-7_00057	sigA_1	-0.600733	7.6727	3.53561	0.0600643	0.489321
L2-7_01185	potD_2	-0.592391	0.821432	5.57663	0.0182017	0.341968
L2-7_02852	L2-7_02852	-0.591072	4.79688	7.72089	0.00545854	0.212428
L2-7_00731	drrA_2	-0.590335	7.05455	4.61369	0.0317178	0.409201
L2-7_01922	trpE_2	-0.58895	5.52833	2.70494	0.100038	0.549618
L2-7_02323	L2-7_02323	-0.588669	0.352053	1.84558	0.174299	0.628646
L2-7_00385	nrdR	-0.587838	5.30239	4.45229	0.0348545	0.417564
L2-7_02086	L2-7_02086	-0.584944	8.06603	3.53307	0.0601562	0.489321
L2-7_00445	L2-7_00445	-0.582401	1.43609	4.06825	0.0436966	0.447481
L2-7_02728	L2-7_02728	-0.57865	3.1475	3.51526	0.060806	0.492423
L2-7_03044	L2-7_03044	-0.578374	1.18642	1.33326	0.248227	0.673312
L2-7_02044	L2-7_02044	-0.577623	4.75196	12.8278	0.000341502	0.0382755
L2-7_00083	L2-7_00083	-0.576994	0.688663	0.31314	0.57576	0.85598
L2-7_00090	hhaIM_1	-0.576731	2.68606	0.872078	0.350381	0.723328
L2-7_01399	L2-7_01399	-0.571881	5.0585	7.604	0.00582391	0.218553
L2-7_02005	L2-7_02005	-0.570013	2.48872	2.45484	0.117163	0.564667
L2-7_02645	L2-7_02645	-0.567397	1.1537	0.898056	0.343304	0.721633
L2-7_01216	gerAA	-0.566614	1.98025	2.19688	0.138291	0.594901
L2-7_01186	L2-7_01186	-0.564774	1.55006	4.58644	0.0322259	0.409201
L2-7_01127	L2-7_01127	-0.562518	3.32912	1.70798	0.191248	0.643478
L2-7_00332	bioB_1	-0.561708	6.40193	1.62962	0.201755	0.644952
L2-7_03006	iap_2	-0.560799	2.21103	1.15936	0.281598	0.681969
L2-7_00068	L2-7_00068	-0.560562	0.552789	1.10245	0.293729	0.691567
L2-7_00081	L2-7_00081	-0.558352	3.00433	0.401212	0.526464	0.838367
L2-7_01834	L2-7_01834	-0.555143	1.85786	1.57254	0.209839	0.65185
L2-7_01921	trpE_1	-0.554575	4.31325	2.34631	0.12558	0.574958
L2-7_02777	alsT_4	-0.554388	3.36514	4.14069	0.041864	0.447481
L2-7_01838	nagB	-0.551144	4.86948	5.64895	0.0174658	0.341968
L2-7_01559	luxQ_1	-0.55108	5.71905	3.04461	0.0810054	0.529084
L2-7_01227	L2-7_01227	-0.549218	5.15457	5.58552	0.0181096	0.341968
L2-7_00966	fbpC	-0.54896	5.67251	6.1186	0.0133767	0.30227
L2-7_00912	L2-7_00912	-0.546378	3.87346	4.99817	0.0253741	0.382249
L2-7_00874	L2-7_00874	-0.544697	1.72879	3.85602	0.0495678	0.466665
L2-7_00325	L2-7_00325	-0.544162	1.06944	1.17826	0.277711	0.6815
L2-7_02703	L2-7_02703	-0.543254	3.64574	5.81621	0.0158791	0.332039
L2-7_00226	rsmH_1	-0.542675	7.09719	8.56321	0.00343023	0.174623
L2-7_00183	L2-7_00183	-0.540962	3.52204	1.67689	0.195338	0.643488
L2-7_01200	L2-7_01200	-0.540135	4.63572	2.25408	0.133263	0.589599
L2-7_00462	L2-7_00462	-0.536078	3.09053	3.70903	0.0541188	0.485457
L2-7_02801	L2-7_02801	-0.536045	1.8763	2.60819	0.106313	0.553984
L2-7_01283	apbE	-0.533973	4.92357	5.52744	0.0187205	0.347383
L2-7_01476	L2-7_01476	-0.533848	0.97492	0.892949	0.344679	0.723328
L2-7_02987	L2-7_02987	-0.532037	4.02404	3.4908	0.0617106	0.496877
L2-7_02226	L2-7_02226	-0.525194	1.21844	4.24541	0.0393567	0.438296
L2-7_00680	L2-7_00680	-0.524385	2.16058	3.90044	0.0482734	0.458515
L2-7_01870	pucK_2	-0.522619	2.85752	2.12508	0.144906	0.597081
L2-7_00089	L2-7_00089	-0.521934	0.448144	0.645989	0.42155	0.775166
L2-7_01576	ssuC_3	-0.51847	2.38888	2.89885	0.0886426	0.536311
L2-7_02318	L2-7_02318	-0.518236	2.36956	2.84526	0.091644	0.537276
L2-7_00980	L2-7_00980	-0.515465	7.02283	11.1213	0.000853419	0.0747275
L2-7_01795	cspB	-0.514375	3.39385	1.47053	0.225263	0.657191
L2-7_02435	pduB_3	-0.514297	6.55598	1.58298	0.208332	0.649451
L2-7_03008	L2-7_03008	-0.514222	2.89886	5.2646	0.0217634	0.365698
L2-7_00080	L2-7_00080	-0.510314	3.1043	0.311647	0.576672	0.85598
L2-7_02814	yccX	-0.509532	6.26762	9.62131	0.00192333	0.134729
L2-7_00484	L2-7_00484	-0.50804	6.93411	2.71276	0.0995485	0.549618
L2-7_02853	cph2_3	-0.505323	5.75915	8.01503	0.00463907	0.19998
L2-7_01504	L2-7_01504	-0.504848	4.59493	3.09225	0.078666	0.525578
L2-7_00184	cas1_1	-0.503784	4.41507	1.96102	0.161404	0.616723
L2-7_00882	L2-7_00882	-0.502944	1.69422	2.41196	0.120412	0.568585
L2-7_02300	L2-7_02300	-0.500196	3.55682	1.98202	0.159178	0.616723
L2-7_02356	traG_3	-0.499614	4.03193	0.696471	0.403972	0.760897
L2-7_00561	L2-7_00561	-0.499045	3.15763	2.18458	0.139399	0.594901
L2-7_00252	L2-7_00252	-0.496764	3.28922	0.983032	0.321451	0.709194
L2-7_01650	L2-7_01650	-0.495296	2.77961	4.08023	0.0433878	0.447481
L2-7_00463	degU_1	-0.495214	2.67656	2.73151	0.0983865	0.54862
L2-7_02324	L2-7_02324	-0.493231	1.77369	1.14063	0.285519	0.684019
L2-7_02871	L2-7_02871	-0.492767	3.24416	2.87566	0.0899279	0.537276
L2-7_00651	L2-7_00651	-0.492582	3.54546	8.20065	0.00418753	0.186456
L2-7_02765	L2-7_02765	-0.491505	3.52292	9.93458	0.00162202	0.119603
L2-7_00069	L2-7_00069	-0.491317	0.518584	0.437155	0.508499	0.8255
L2-7_00302	L2-7_00302	-0.490534	6.62767	1.38976	0.238445	0.66938
L2-7_01183	potB_2	-0.48887	0.914448	3.16266	0.0753403	0.520279
L2-7_01877	L2-7_01877	-0.488506	2.54744	0.64159	0.423136	0.775166
L2-7_02615	znuB	-0.487495	5.74345	3.91757	0.0477839	0.458515
L2-7_00082	L2-7_00082	-0.487206	0.924768	0.311376	0.576837	0.85598
L2-7_01315	L2-7_01315	-0.486883	2.61298	4.46273	0.034642	0.417564
L2-7_01796	L2-7_01796	-0.484272	3.22891	2.43352	0.118766	0.565956
L2-7_01739	L2-7_01739	-0.483708	9.19993	2.99882	0.0833253	0.533746
L2-7_00101	L2-7_00101	-0.481859	1.90106	0.447303	0.503618	0.822274
L2-7_01180	L2-7_01180	-0.481539	3.2743	1.78233	0.181863	0.63953
L2-7_02059	mepA_10	-0.480904	5.50466	3.85193	0.0496888	0.466665
L2-7_02604	basR	-0.480017	8.45797	4.91771	0.0265828	0.390374
L2-7_01192	bdhA	-0.479682	1.3742	4.24404	0.0393883	0.438296
L2-7_00562	arlS_1	-0.478858	3.53451	2.90702	0.0881947	0.536311
L2-7_01835	trpD	-0.478392	7.51	1.70151	0.19209	0.643478
L2-7_00475	nrgB	-0.47778	1.25514	5.10052	0.0239186	0.365698
L2-7_02930	L2-7_02930	-0.476426	6.00374	6.29187	0.0121293	0.29732
L2-7_02763	dacF_3	-0.475323	3.72757	3.2209	0.0727035	0.512995
L2-7_00169	L2-7_00169	-0.475017	4.78053	5.77721	0.0162352	0.336526
L2-7_00228	L2-7_00228	-0.470763	2.88192	4.18772	0.0407178	0.447481
L2-7_00336	L2-7_00336	-0.470539	3.65553	3.46045	0.0628532	0.498408
L2-7_02096	pgsA_2	-0.468588	0.374259	2.59997	0.106865	0.553984
L2-7_01669	mglC	-0.467872	6.46328	3.6452	0.056231	0.489321
L2-7_02104	L2-7_02104	-0.467051	1.19587	1.84535	0.174325	0.628646
L2-7_02041	L2-7_02041	-0.465279	2.0723	0.678448	0.410122	0.765597
L2-7_00416	L2-7_00416	-0.464775	0.784862	1.77432	0.182848	0.63953
L2-7_01182	potA_3	-0.464758	1.02473	1.42118	0.23321	0.664989
L2-7_02625	L2-7_02625	-0.457692	4.44711	2.37898	0.122978	0.570237
L2-7_00982	cmk	-0.457137	11.1869	3.96463	0.0464656	0.448954
L2-7_01173	tagB_3	-0.455686	8.20552	5.12898	0.0235295	0.365698
L2-7_00181	L2-7_00181	-0.454643	4.05157	1.65622	0.198114	0.644952
L2-7_02026	L2-7_02026	-0.453458	4.57986	4.88614	0.0270732	0.391224
L2-7_02878	L2-7_02878	-0.452885	1.2915	0.922784	0.336745	0.720112
L2-7_02297	yneA	-0.451153	2.33222	2.82178	0.0929935	0.541241
L2-7_00911	Int-Tn_2	-0.450514	4.93169	2.43413	0.11872	0.565956
L2-7_02351	L2-7_02351	-0.44707	0.81123	2.63188	0.104738	0.553984
L2-7_00095	L2-7_00095	-0.44085	1.25214	0.411973	0.52097	0.834968
L2-7_00444	mntR_1	-0.438898	2.09024	3.70321	0.0543079	0.485457
L2-7_02346	L2-7_02346	-0.438699	5.12342	5.14454	0.0233196	0.365698
L2-7_02773	thiD_2	-0.437633	4.24558	4.09389	0.0430386	0.447481
L2-7_02624	L2-7_02624	-0.437396	3.3654	2.12062	0.145328	0.597081
L2-7_01686	ctc	-0.436701	8.03179	1.63044	0.201642	0.644952
L2-7_00071	L2-7_00071	-0.434011	2.54378	0.378029	0.53866	0.842228
L2-7_01611	arlS_2	-0.433732	5.86605	8.56277	0.00343107	0.174623
L2-7_00803	cysG	-0.433729	6.17764	2.58815	0.107666	0.553984
L2-7_01741	cysA_2	-0.430705	8.65154	2.62737	0.105036	0.553984
L2-7_01214	L2-7_01214	-0.428953	0.125569	1.33574	0.247786	0.673312
L2-7_00857	livH	-0.427982	7.5272	1.35903	0.243705	0.671657
L2-7_02531	nikQ	-0.426914	6.90323	1.74738	0.186206	0.640228
L2-7_02873	L2-7_02873	-0.425301	4.26133	3.88974	0.0485819	0.459887
L2-7_00858	L2-7_00858	-0.423077	8.31319	1.1093	0.292234	0.689671
L2-7_02357	L2-7_02357	-0.422826	2.16819	0.458039	0.498542	0.818096
L2-7_00096	L2-7_00096	-0.421999	1.67779	0.372024	0.541903	0.843094
L2-7_00513	L2-7_00513	-0.421998	4.00632	6.3293	0.0118759	0.29732
L2-7_02220	L2-7_02220	-0.420952	4.29852	4.04685	0.0442538	0.447481
L2-7_02953	L2-7_02953	-0.420133	0.999042	1.44882	0.228717	0.662735
L2-7_00500	amt	-0.419891	1.93047	1.8293	0.17621	0.632211
L2-7_03076	L2-7_03076	-0.419202	4.52863	1.55506	0.212391	0.655978
L2-7_02238	L2-7_02238	-0.418425	4.02327	2.04266	0.152942	0.611332
L2-7_01911	lctA	-0.417894	7.73899	2.59475	0.107219	0.553984
L2-7_01577	tauB	-0.417863	1.64504	2.84506	0.0916552	0.537276
L2-7_02043	L2-7_02043	-0.415921	1.46261	2.49141	0.114469	0.563696
L2-7_00717	L2-7_00717	-0.413702	5.13229	2.84839	0.0914657	0.537276
L2-7_01829	L2-7_01829	-0.411246	9.02066	0.416391	0.518744	0.833918
L2-7_01172	L2-7_01172	-0.411148	7.29153	5.74459	0.0165396	0.336526
L2-7_03003	L2-7_03003	-0.41079	3.07947	0.96394	0.326196	0.714131
L2-7_00398	norM_1	-0.410172	4.82558	8.16163	0.0042786	0.187322
L2-7_02610	L2-7_02610	-0.408125	6.87642	9.15144	0.00248522	0.153653
L2-7_00474	nrgA	-0.408074	3.06348	4.74986	0.0293007	0.400491
L2-7_02678	degA_2	-0.406759	4.00996	1.79047	0.180869	0.638279
L2-7_00337	L2-7_00337	-0.406673	5.39376	4.13727	0.0419489	0.447481
L2-7_01869	L2-7_01869	-0.405622	4.16039	2.95461	0.0856332	0.533746
L2-7_02287	dnaA	-0.405396	7.72658	3.15065	0.0758967	0.520279
L2-7_01573	L2-7_01573	-0.405229	11.5915	1.33097	0.248633	0.673761
L2-7_00097	L2-7_00097	-0.40427	1.57555	0.302957	0.582035	0.859252
L2-7_01360	sigM	-0.403888	0.495617	1.2507	0.263419	0.676959
L2-7_00762	eccCa1	-0.403744	1.56156	2.86977	0.0902578	0.537276
L2-7_02455	L2-7_02455	-0.40204	0.114293	0.979894	0.322225	0.709249
L2-7_01740	L2-7_01740	-0.401883	8.53615	2.59814	0.106989	0.553984
L2-7_00883	L2-7_00883	-0.401325	1.48678	1.34922	0.245414	0.67221
L2-7_00732	L2-7_00732	-0.400155	6.72023	5.16553	0.0230394	0.365698
L2-7_02704	xerD_2	-0.399077	6.56677	3.3201	0.0684377	0.506122
L2-7_01931	L2-7_01931	-0.39896	4.21478	1.01428	0.313881	0.707207
L2-7_01791	L2-7_01791	-0.398409	5.40189	2.31345	0.128259	0.577551
L2-7_01924	trpC	-0.398092	6.08873	0.883818	0.347158	0.723328
L2-7_01123	srlR_2	-0.396499	5.11406	6.57892	0.0103193	0.280726
L2-7_00951	L2-7_00951	-0.395811	5.64201	1.56077	0.211553	0.654272
L2-7_01284	yfcE	-0.395205	4.52914	2.46531	0.116385	0.564667
L2-7_00871	L2-7_00871	-0.394999	2.18612	2.01589	0.15566	0.616606
L2-7_00536	mecB	-0.394268	7.32704	5.65092	0.0174462	0.341968
L2-7_01045	L2-7_01045	-0.393048	2.48146	2.71104	0.099656	0.549618
L2-7_00326	L2-7_00326	-0.392629	3.45343	0.674498	0.411488	0.767194
L2-7_00334	deoR_1	-0.391954	5.11064	3.44812	0.0633238	0.498408
L2-7_01012	sbcD	-0.39184	5.86131	6.7443	0.00940477	0.273739
L2-7_02308	alaA	-0.391527	7.00602	6.22062	0.0126271	0.29732
L2-7_01757	L2-7_01757	-0.390365	4.40827	4.78456	0.0287159	0.398327
L2-7_02178	cfiB_2	-0.390248	3.32916	3.96579	0.0464338	0.448954
L2-7_02929	L2-7_02929	-0.389688	5.43261	6.55985	0.0104305	0.281021
L2-7_01820	comEA	-0.38958	7.11215	3.15713	0.075596	0.520279
L2-7_02776	crcB	-0.389286	5.24521	2.23801	0.134654	0.591381
L2-7_01013	sbcC	-0.388094	6.92814	6.31999	0.0119385	0.29732
L2-7_00387	L2-7_00387	-0.387594	2.53144	1.1199	0.289941	0.687637
L2-7_02071	L2-7_02071	-0.387499	3.04161	1.52792	0.216425	0.656355
L2-7_02497	L2-7_02497	-0.386599	6.1286	3.3932	0.0654658	0.504043
L2-7_00497	L2-7_00497	-0.386379	5.09606	2.94677	0.0860495	0.533746
L2-7_01687	L2-7_01687	-0.385569	3.51566	5.61256	0.0178322	0.341968
L2-7_01198	ctpV	-0.384818	7.49402	0.505123	0.477258	0.804565
L2-7_00335	tcdA	-0.384291	5.3419	4.57611	0.0324207	0.409201
L2-7_02452	L2-7_02452	-0.382228	10.8307	4.15958	0.0413996	0.447481
L2-7_01201	xerD_1	-0.382215	4.53873	1.99886	0.157418	0.616606
L2-7_00244	crp	-0.380825	3.60926	5.14114	0.0233653	0.365698
L2-7_02605	L2-7_02605	-0.377998	3.73222	2.49481	0.114222	0.563609
L2-7_02463	L2-7_02463	-0.374927	4.37689	3.57167	0.0587731	0.489321
L2-7_01849	L2-7_01849	-0.373808	1.26269	2.66904	0.102318	0.552974
L2-7_01927	trpA	-0.373612	7.04043	0.574078	0.448643	0.786177
L2-7_00862	eno_1	-0.373571	3.8556	0.745811	0.387806	0.749918
L2-7_01738	ldhB	-0.37349	8.55316	1.50629	0.219706	0.656355
L2-7_00909	L2-7_00909	-0.372463	7.73873	3.54384	0.0597669	0.489321
L2-7_02162	lacR	-0.372391	4.86638	4.58393	0.0322731	0.409201
L2-7_00611	L2-7_00611	-0.37231	0.809539	1.54608	0.213715	0.656355
L2-7_02961	prtP	-0.371713	1.21757	3.07134	0.0796836	0.525578
L2-7_01912	spoIIID	-0.371691	5.48019	3.06873	0.079812	0.525578
L2-7_01631	L2-7_01631	-0.371297	2.78411	1.02311	0.311783	0.707207
L2-7_02528	L2-7_02528	-0.371108	1.45681	1.31482	0.251524	0.675575
L2-7_02718	gltD_2	-0.371075	4.57874	6.45487	0.0110649	0.292488
L2-7_01398	putP_1	-0.370016	4.942	1.54006	0.214609	0.656355
L2-7_02764	ygaZ_2	-0.369743	3.74066	5.87696	0.0153403	0.325632
L2-7_02876	L2-7_02876	-0.369647	3.87843	3.15506	0.0756919	0.520279
L2-7_00846	kdpD	-0.368043	7.53957	4.13532	0.0419972	0.447481
L2-7_00843	ktrB_2	-0.367943	6.84782	1.94874	0.162723	0.617393
L2-7_00443	L2-7_00443	-0.367482	4.56023	2.97891	0.0843562	0.533746
L2-7_01652	L2-7_01652	-0.366944	3.97399	3.29836	0.0693489	0.506122
L2-7_00703	fbpA	-0.365807	2.81705	1.70231	0.191986	0.643478
L2-7_03022	L2-7_03022	-0.363836	3.4948	2.96124	0.0852827	0.533746
L2-7_01801	L2-7_01801	-0.363738	1.30849	1.26444	0.260813	0.676959
L2-7_00902	L2-7_00902	-0.362978	0.0651795	0.995451	0.318414	0.708654
L2-7_02835	gabR	-0.36288	5.01289	3.70634	0.0542061	0.485457
L2-7_02654	L2-7_02654	-0.362385	1.86916	2.21141	0.136994	0.594901
L2-7_02237	L2-7_02237	-0.361851	6.2477	1.95972	0.161543	0.616723
L2-7_00953	whiA	-0.361272	9.0766	2.52591	0.11199	0.560426
L2-7_02859	rpfC_5	-0.360949	6.26011	3.57535	0.0586432	0.489321
L2-7_02813	mutS2	-0.360945	8.13857	4.08781	0.0431937	0.447481
L2-7_00669	ssuB	-0.36075	0.314292	1.14372	0.284868	0.684019
L2-7_02358	L2-7_02358	-0.360672	1.50597	0.270764	0.60282	0.866442
L2-7_00289	L2-7_00289	-0.359498	1.73257	1.56873	0.210392	0.652845
L2-7_02058	L2-7_02058	-0.358453	6.13569	2.80055	0.094232	0.541241
L2-7_02309	deoR_3	-0.35511	6.2855	3.00873	0.0828173	0.533746
L2-7_01337	pbpB	-0.354842	6.25416	3.06682	0.0799059	0.525578
L2-7_02845	L2-7_02845	-0.354249	3.10173	1.62522	0.202365	0.644952
L2-7_01474	cysN	-0.353957	3.58098	1.03551	0.308868	0.706676
L2-7_02982	L2-7_02982	-0.353222	8.8739	2.95966	0.0853661	0.533746
L2-7_02819	L2-7_02819	-0.35315	0.497185	0.908326	0.340559	0.720112
L2-7_02983	L2-7_02983	-0.352084	7.01638	4.03713	0.0445094	0.447481
L2-7_01538	kynB	-0.349972	4.61834	1.68437	0.194345	0.643488
L2-7_02659	L2-7_02659	-0.349548	5.34725	5.14408	0.0233258	0.365698
L2-7_02598	L2-7_02598	-0.349197	6.39395	1.17586	0.2782	0.6815
L2-7_01822	senX3	-0.348187	7.75642	6.12575	0.0133227	0.30227
L2-7_01536	garR	-0.34748	1.47209	0.905864	0.341214	0.720112
L2-7_02057	L2-7_02057	-0.345304	3.85445	1.23009	0.267389	0.676959
L2-7_01313	L2-7_01313	-0.344517	4.99803	3.13138	0.0767989	0.522585
L2-7_01572	L2-7_01572	-0.343338	7.30938	0.820984	0.364893	0.733976
L2-7_02079	L2-7_02079	-0.342921	4.91673	4.01582	0.0450754	0.447481
L2-7_00990	L2-7_00990	-0.342888	1.45835	1.49789	0.220996	0.656355
L2-7_01310	yccM_1	-0.342049	3.14695	2.08064	0.149178	0.604556
L2-7_01713	L2-7_01713	-0.341797	6.61754	3.39019	0.0655855	0.504043
L2-7_02812	L2-7_02812	-0.341784	5.28361	5.16445	0.0230537	0.365698
L2-7_00457	L2-7_00457	-0.341475	5.69255	2.17476	0.140292	0.594901
L2-7_00205	fabG_1	-0.341038	3.39721	3.32358	0.0682929	0.506122
L2-7_01400	L2-7_01400	-0.340656	4.68086	2.18767	0.139119	0.594901
L2-7_02877	yeaJ_2	-0.34031	3.02099	1.8128	0.178173	0.635975
L2-7_02921	fieF	-0.33914	6.19906	4.05089	0.0441482	0.447481
L2-7_02319	L2-7_02319	-0.339007	3.12293	1.62754	0.202043	0.644952
L2-7_02540	L2-7_02540	-0.338731	3.79111	4.74059	0.0294589	0.400698
L2-7_02805	L2-7_02805	-0.338432	2.45091	2.97607	0.0845041	0.533746
L2-7_00499	L2-7_00499	-0.338029	2.28061	1.6828	0.194553	0.643488
L2-7_01564	L2-7_01564	-0.33751	4.34897	1.23932	0.265602	0.676959
L2-7_02916	gutB	-0.337399	0.193489	1.41495	0.234236	0.665647
L2-7_00094	L2-7_00094	-0.337233	-0.150797	0.198337	0.656067	0.89269
L2-7_00608	L2-7_00608	-0.335996	2.27215	1.03587	0.308785	0.706676
L2-7_01376	L2-7_01376	-0.335867	3.59642	1.88403	0.169876	0.623029
L2-7_01219	L2-7_01219	-0.335351	1.99852	1.55382	0.212573	0.655978
L2-7_02897	ypdB	-0.335155	4.38656	0.545739	0.460064	0.79378
L2-7_02981	L2-7_02981	-0.335127	7.57664	3.29137	0.069645	0.506122
L2-7_03002	L2-7_03002	-0.335122	4.61441	1.58816	0.207589	0.649451
L2-7_00275	L2-7_00275	-0.334861	1.11789	1.72421	0.189153	0.643211
L2-7_01477	nadB_1	-0.334787	3.45066	0.71913	0.396429	0.755643
L2-7_01697	lldD	-0.334497	6.04914	2.21181	0.136958	0.594901
L2-7_01811	L2-7_01811	-0.333651	3.77466	1.12879	0.288033	0.686282
L2-7_00954	L2-7_00954	-0.333481	9.6442	2.32123	0.127619	0.577551
L2-7_02509	L2-7_02509	-0.333469	7.7203	1.42607	0.232407	0.6641
L2-7_01509	L2-7_01509	-0.332717	4.13574	1.70228	0.19199	0.643478
L2-7_01719	L2-7_01719	-0.332353	5.28273	5.15295	0.0232069	0.365698
L2-7_02496	L2-7_02496	-0.332121	4.72812	2.56065	0.109554	0.557112
L2-7_00859	lptB	-0.331554	8.46872	0.688355	0.406724	0.761792
L2-7_02522	folE	-0.331096	5.85258	1.29358	0.255389	0.676371
L2-7_02425	mepA_12	-0.330965	4.58826	5.61795	0.0177775	0.341968
L2-7_02042	L2-7_02042	-0.330868	4.68477	4.73014	0.0296385	0.401194
L2-7_02643	L2-7_02643	-0.329466	4.33971	2.37375	0.12339	0.570528
L2-7_02833	L2-7_02833	-0.329416	2.73892	2.00777	0.156495	0.616606
L2-7_02621	L2-7_02621	-0.329391	1.96796	0.772995	0.379292	0.745062
L2-7_00594	srpC_1	-0.328712	7.19567	6.41099	0.0113416	0.294251
L2-7_01881	L2-7_01881	-0.327971	1.87055	0.32805	0.566809	0.85525
L2-7_00490	L2-7_00490	-0.32714	6.43125	2.28317	0.130784	0.58413
L2-7_02706	xerC_2	-0.327044	2.12843	1.90737	0.167256	0.6209
L2-7_01338	L2-7_01338	-0.326988	6.17128	3.9856	0.0458908	0.448516
L2-7_00496	vraR	-0.326214	4.39815	2.01688	0.155559	0.616606
L2-7_01518	L2-7_01518	-0.32606	8.50602	3.8348	0.0501991	0.46886
L2-7_02847	L2-7_02847	-0.325474	6.27791	3.32239	0.0683424	0.506122
L2-7_02188	sinR	-0.321505	2.06314	2.08759	0.1485	0.604556
L2-7_00844	ktrA_2	-0.321214	5.52769	1.37948	0.24019	0.66938
L2-7_02347	L2-7_02347	-0.321051	2.07779	1.19735	0.273853	0.679858
L2-7_01194	aguA	-0.320922	0.798732	1.4258	0.232451	0.6641
L2-7_00180	cas5_1	-0.319958	2.70621	0.865858	0.352105	0.72388
L2-7_00234	acrB_1	-0.319165	0.438534	0.830992	0.361986	0.731755
L2-7_00284	L2-7_00284	-0.319162	1.21196	0.312519	0.576138	0.85598
L2-7_00243	mepA_2	-0.31909	4.09877	3.65326	0.0559597	0.489321
L2-7_00920	ecfT_2	-0.318918	6.61518	3.23014	0.0722945	0.512283
L2-7_02990	L2-7_02990	-0.318682	0.559321	0.878919	0.348498	0.723328
L2-7_02523	queC_2	-0.317941	6.45831	1.24147	0.265189	0.676959
L2-7_02521	queE	-0.317748	5.59315	1.25046	0.263465	0.676959
L2-7_00208	srlE	-0.317301	4.16368	3.48509	0.061924	0.496904
L2-7_01629	L2-7_01629	-0.317287	4.71798	3.02919	0.0817791	0.532895
L2-7_00706	mobA_1	-0.317255	0.392599	0.849191	0.356781	0.727056
L2-7_02530	cbiO	-0.316836	6.29143	0.795465	0.372453	0.742213
L2-7_02618	L2-7_02618	-0.315839	7.83898	2.85395	0.09115	0.537276
L2-7_01926	trpB_1	-0.315233	7.35943	0.430517	0.511735	0.826927
L2-7_02589	mta_2	-0.314439	4.78533	3.36511	0.0665911	0.506122
L2-7_01847	L2-7_01847	-0.314402	1.93656	1.02963	0.310246	0.706868
L2-7_01575	L2-7_01575	-0.314052	3.64677	2.99135	0.0837102	0.533746
L2-7_00764	prkC_1	-0.313606	0.0847619	0.770437	0.380082	0.745062
L2-7_00207	srlA	-0.31339	2.51968	1.46968	0.225396	0.657191
L2-7_01171	yjjP	-0.313123	7.29894	5.97211	0.0145338	0.318198
L2-7_02532	nikMN	-0.312853	8.10037	0.717007	0.397127	0.755945
L2-7_00130	yraA	-0.312848	0.56352	1.35614	0.244208	0.671657
L2-7_00750	L2-7_00750	-0.312464	4.08546	1.60745	0.204851	0.645483
L2-7_02505	L2-7_02505	-0.312389	5.38596	1.4524	0.228144	0.661758
L2-7_01336	ftsW_1	-0.312081	6.04825	1.96478	0.161003	0.616723
L2-7_00734	L2-7_00734	-0.311334	5.58673	3.32336	0.0683021	0.506122
L2-7_02775	yrpC	-0.310416	6.17624	5.41684	0.0199435	0.355773
L2-7_02614	znuC	-0.309518	4.90393	2.31089	0.12847	0.577551
L2-7_02221	L2-7_02221	-0.30868	5.90827	1.49491	0.221456	0.656355
L2-7_01040	xpt	-0.308293	5.38201	2.12454	0.144956	0.597081
L2-7_02702	L2-7_02702	-0.307824	4.98326	3.14863	0.0759905	0.520279
L2-7_01406	L2-7_01406	-0.306732	3.66971	1.02017	0.312478	0.707207
L2-7_02257	L2-7_02257	-0.306631	0.823749	0.60279	0.437515	0.780502
L2-7_02541	L2-7_02541	-0.306319	4.45507	3.45184	0.0631814	0.498408
L2-7_02345	L2-7_02345	-0.306213	3.58266	1.65115	0.198803	0.644952
L2-7_03019	L2-7_03019	-0.305971	7.91029	3.31043	0.0688417	0.506122
L2-7_02499	L2-7_02499	-0.305969	0.260442	0.714227	0.398044	0.756662
L2-7_00498	L2-7_00498	-0.304865	5.86815	1.90227	0.167824	0.6209
L2-7_02536	L2-7_02536	-0.302973	6.71967	0.167933	0.681955	0.898913
L2-7_00975	L2-7_00975	-0.302436	2.63496	1.65571	0.198184	0.644952
L2-7_00287	L2-7_00287	-0.302335	2.09977	1.71161	0.190776	0.643478
L2-7_01925	trpF	-0.302319	5.66144	0.457739	0.498682	0.818096
L2-7_02848	L2-7_02848	-0.302059	3.58965	1.41312	0.234539	0.665835
L2-7_01237	L2-7_01237	-0.302011	2.06885	1.6134	0.204015	0.645483
L2-7_03016	L2-7_03016	-0.301142	2.28618	2.247	0.133874	0.590731
L2-7_01744	L2-7_01744	-0.300993	4.6132	4.54343	0.0330453	0.413362
L2-7_02719	hndD_2	-0.300664	5.1196	4.1359	0.0419828	0.447481
L2-7_00236	bmrR	-0.299796	4.7899	1.59352	0.206823	0.648958
L2-7_02861	deoR_4	-0.299334	6.08069	2.5719	0.108777	0.555178
L2-7_02896	L2-7_02896	-0.299239	3.65426	0.508917	0.475608	0.803288
L2-7_03029	L2-7_03029	-0.298162	0.262829	0.273002	0.601325	0.866442
L2-7_02232	maf	-0.297189	5.17541	2.54105	0.110921	0.559891
L2-7_02080	polC	-0.296956	8.28903	3.17838	0.0746188	0.520104
L2-7_02626	L2-7_02626	-0.296346	3.34767	1.63347	0.201223	0.644952
L2-7_01072	mutT	-0.294984	3.94533	2.75681	0.0968415	0.54862
L2-7_02029	L2-7_02029	-0.294977	7.36067	4.25587	0.0391149	0.438296
L2-7_01419	mtrR_1	-0.294908	2.62736	1.31021	0.252357	0.675575
L2-7_00179	L2-7_00179	-0.294578	3.00786	1.09648	0.295039	0.692315
L2-7_03023	L2-7_03023	-0.294379	2.48903	1.60663	0.204966	0.645483
L2-7_00104	L2-7_00104	-0.29399	5.76283	0.497439	0.480628	0.806902
L2-7_01089	fabG_3	-0.29375	4.87066	3.00191	0.0831664	0.533746
L2-7_02734	nudF	-0.293102	3.61536	2.90633	0.0882325	0.536311
L2-7_00414	tenI	-0.292224	3.33704	3.07733	0.0793909	0.525578
L2-7_02904	L2-7_02904	-0.291942	2.01177	1.30015	0.254187	0.676371
L2-7_01971	dnaJ_2	-0.291551	5.75086	1.01082	0.314708	0.707524
L2-7_00949	desK	-0.291493	3.56195	1.92535	0.165268	0.618182
L2-7_02707	L2-7_02707	-0.290319	3.46416	1.49723	0.221098	0.656355
L2-7_02762	puuR_2	-0.289756	3.70664	1.98653	0.158704	0.616606
L2-7_02949	L2-7_02949	-0.289575	-0.353392	0.741397	0.389214	0.75015
L2-7_00861	L2-7_00861	-0.289442	7.76586	0.565845	0.451915	0.788459
L2-7_01456	L2-7_01456	-0.289237	3.72688	0.791428	0.373669	0.742213
L2-7_01961	L2-7_01961	-0.2885	2.83601	0.789354	0.374296	0.742213
L2-7_01552	pgsA_1	-0.288423	6.59634	1.60627	0.205017	0.645483
L2-7_02382	L2-7_02382	-0.28802	6.4463	1.74005	0.187133	0.640228
L2-7_02030	hscC	-0.288001	7.52047	3.59105	0.0580916	0.489321
L2-7_00370	ybbD	-0.287849	7.04927	4.09078	0.0431177	0.447481
L2-7_00842	L2-7_00842	-0.287778	4.46781	0.9826	0.321558	0.709194
L2-7_01836	lepA	-0.287608	9.19273	0.906759	0.340976	0.720112
L2-7_01732	L2-7_01732	-0.285874	6.59204	2.35234	0.125095	0.573675
L2-7_01163	L2-7_01163	-0.285663	0.650719	1.25392	0.262805	0.676959
L2-7_00438	pchR	-0.285604	6.56117	4.34343	0.037152	0.427887
L2-7_02872	mgrA	-0.284778	3.98587	2.16848	0.140865	0.594901
L2-7_01610	tcrA	-0.284443	5.24417	3.44913	0.063285	0.498408
L2-7_02462	L2-7_02462	-0.284377	4.33967	1.87011	0.171463	0.624902
L2-7_01017	L2-7_01017	-0.284374	5.69439	1.29655	0.254843	0.676371
L2-7_00464	L2-7_00464	-0.284345	6.18808	4.81106	0.0282776	0.394198
L2-7_01718	sdpI	-0.283831	6.8166	4.43258	0.0352592	0.417564
L2-7_01865	cfiB_1	-0.283463	7.25331	2.01333	0.155922	0.616606
L2-7_02063	phoR_4	-0.283042	4.68512	1.5629	0.211241	0.654272
L2-7_00394	L2-7_00394	-0.28218	0.45481	0.413952	0.519971	0.834933
L2-7_01648	L2-7_01648	-0.281958	1.01896	1.23304	0.266816	0.676959
L2-7_00918	cgkA_3	-0.281619	6.82906	2.39074	0.122056	0.569052
L2-7_00413	thiH	-0.279798	4.14007	2.87469	0.0899825	0.537276
L2-7_00494	L2-7_00494	-0.278583	4.5537	1.26973	0.259818	0.676959
L2-7_00955	murB	-0.277927	9.75934	1.40867	0.235277	0.667128
L2-7_00583	L2-7_00583	-0.277692	5.27367	0.957965	0.3277	0.714131
L2-7_02676	araB_4	-0.277482	3.43507	1.50031	0.220624	0.656355
L2-7_00233	acrC	-0.2767	0.555421	0.626183	0.428759	0.777635
L2-7_00889	L2-7_00889	-0.276474	0.353063	0.319146	0.572121	0.85598
L2-7_00673	L2-7_00673	-0.275414	4.52173	3.73304	0.0533461	0.485457
L2-7_02111	L2-7_02111	-0.275405	5.21377	1.31895	0.25078	0.675575
L2-7_02538	ytrA_3	-0.275366	4.02202	0.117567	0.731688	0.916615
L2-7_01673	L2-7_01673	-0.274932	5.62419	2.72832	0.0985829	0.54862
L2-7_00257	L2-7_00257	-0.274865	1.2975	0.616365	0.432401	0.778128
L2-7_00716	L2-7_00716	-0.274536	1.10325	1.32669	0.249394	0.675172
L2-7_02549	uvrY	-0.273357	3.10106	1.71518	0.190315	0.643478
L2-7_02369	L2-7_02369	-0.273294	1.22925	0.982898	0.321484	0.709194
L2-7_00119	corC_1	-0.271914	8.12134	2.12862	0.144571	0.597081
L2-7_02298	xerC_1	-0.271899	5.59872	4.26899	0.038814	0.438296
L2-7_00515	L2-7_00515	-0.271653	7.27916	3.13051	0.0768398	0.522585
L2-7_02288	dnaN	-0.271024	5.86744	0.78764	0.374815	0.742213
L2-7_02754	L2-7_02754	-0.269981	4.68755	2.07034	0.150188	0.605505
L2-7_01568	sigW_1	-0.269711	3.02066	1.23309	0.266806	0.676959
L2-7_02603	L2-7_02603	-0.269438	8.06523	2.93697	0.0865727	0.53431
L2-7_02290	recF	-0.269307	7.02646	1.40201	0.236388	0.667128
L2-7_01800	L2-7_01800	-0.268774	5.65285	1.16552	0.280324	0.681799
L2-7_01033	thiD_1	-0.267943	2.32739	1.81422	0.178002	0.635975
L2-7_00942	flr_2	-0.267851	6.94458	3.0883	0.0788572	0.525578
L2-7_00847	kdpE	-0.266928	6.15891	1.99159	0.158175	0.616606
L2-7_00563	czcR	-0.266625	2.53539	0.973896	0.32371	0.71196
L2-7_02758	L2-7_02758	-0.266369	7.1667	2.07997	0.149243	0.604556
L2-7_01036	zupT_1	-0.266358	1.31067	1.17846	0.27767	0.6815
L2-7_02112	L2-7_02112	-0.266248	5.89612	1.94773	0.162831	0.617393
L2-7_00887	L2-7_00887	-0.266178	2.16459	0.951422	0.329358	0.714288
L2-7_02166	L2-7_02166	-0.266023	4.60881	1.62734	0.202072	0.644952
L2-7_01158	spoIIIAE	-0.265994	0.373733	0.905189	0.341394	0.720112
L2-7_01178	tagB_4	-0.26565	7.80056	2.71025	0.0997056	0.549618
L2-7_01031	dacF_2	-0.264763	3.45925	2.40502	0.120947	0.568585
L2-7_02705	L2-7_02705	-0.263646	7.17418	1.68855	0.193792	0.643488
L2-7_02875	L2-7_02875	-0.263155	5.35594	2.17247	0.1405	0.594901
L2-7_02537	ytrB	-0.262393	5.53359	0.111441	0.738509	0.916615
L2-7_01189	hcnB_1	-0.261969	-0.134563	0.621785	0.430385	0.777808
L2-7_01295	L2-7_01295	-0.261885	2.42275	1.22035	0.269293	0.67917
L2-7_01011	eamA	-0.261776	5.04383	2.96132	0.0852781	0.533746
L2-7_02098	L2-7_02098	-0.261459	2.26038	1.69076	0.193501	0.643488
L2-7_02826	L2-7_02826	-0.261136	6.81387	2.25241	0.133407	0.589599
L2-7_02261	aseR	-0.260889	5.26796	1.36607	0.242489	0.671657
L2-7_02717	bioY2	-0.260555	5.74656	0.759663	0.383434	0.747077
L2-7_02992	L2-7_02992	-0.260021	6.5071	1.53381	0.215542	0.656355
L2-7_00921	ykoD_2	-0.258934	7.75955	1.77691	0.18253	0.63953
L2-7_02874	L2-7_02874	-0.258627	4.31434	1.73775	0.187424	0.640336
L2-7_00393	L2-7_00393	-0.258318	4.20499	0.86795	0.351524	0.72388
L2-7_02036	ftsW_2	-0.258237	5.69622	2.8096	0.093702	0.541241
L2-7_02302	L2-7_02302	-0.258077	6.85111	1.64674	0.199403	0.644952
L2-7_00841	L2-7_00841	-0.257946	3.36628	0.853959	0.355435	0.725366
L2-7_00002	L2-7_00002	-0.257418	4.55685	3.24823	0.0715006	0.511083
L2-7_02827	L2-7_02827	-0.257343	4.80626	1.90774	0.167214	0.6209
L2-7_02912	L2-7_02912	-0.256234	6.78631	1.24949	0.263651	0.676959
L2-7_03054	L2-7_03054	-0.256205	4.31339	2.51086	0.113064	0.561915
L2-7_00860	livF	-0.255811	8.45098	0.410889	0.521519	0.835026
L2-7_00030	L2-7_00030	-0.255386	6.74282	2.04869	0.152337	0.609783
L2-7_03026	L2-7_03026	-0.2548	5.92365	1.92355	0.165466	0.618182
L2-7_01651	L2-7_01651	-0.254792	5.84045	1.0554	0.304266	0.70601
L2-7_00003	ygaZ_1	-0.25436	6.31549	2.61101	0.106124	0.553984
L2-7_00147	L2-7_00147	-0.25368	0.936387	0.647378	0.421052	0.775166
L2-7_01250	ymdB_2	-0.253299	3.927	1.92611	0.165185	0.618182
L2-7_01597	L2-7_01597	-0.252914	3.36076	2.95009	0.0858729	0.533746
L2-7_00280	ymdB_1	-0.251255	0.776822	0.793464	0.373055	0.742213
L2-7_02772	L2-7_02772	-0.250353	4.27774	1.56194	0.211382	0.654272
L2-7_01670	mglA_2	-0.250283	6.79085	0.964839	0.325971	0.714131
L2-7_01966	L2-7_01966	-0.250225	5.42901	0.275985	0.599345	0.866442
L2-7_00922	L2-7_00922	-0.249856	7.37743	1.70558	0.19156	0.643478
L2-7_01628	L2-7_01628	-0.249655	5.536	2.8094	0.0937136	0.541241
L2-7_01431	L2-7_01431	-0.249283	2.13765	1.2184	0.269674	0.679272
L2-7_00865	L2-7_00865	-0.248714	-0.114672	0.446776	0.50387	0.822274
L2-7_02681	L2-7_02681	-0.248099	2.09756	1.45567	0.227621	0.661612
L2-7_00220	ilvD	-0.247673	9.98209	1.42936	0.231869	0.6641
L2-7_01903	L2-7_01903	-0.247591	5.92062	1.48203	0.223457	0.657191
L2-7_02989	L2-7_02989	-0.247587	1.62953	1.06501	0.302075	0.703125
L2-7_00436	L2-7_00436	-0.246518	1.71575	1.34088	0.246879	0.67221
L2-7_00868	spo0C_2	-0.246473	2.28194	1.28576	0.25683	0.676959
L2-7_01975	L2-7_01975	-0.246277	7.98798	1.67896	0.195062	0.643488
L2-7_01555	clpC	-0.245838	8.31561	2.40258	0.121136	0.568585
L2-7_02599	L2-7_02599	-0.244993	5.22903	0.587809	0.443268	0.783068
L2-7_00182	L2-7_00182	-0.244706	3.9208	0.586091	0.443935	0.783068
L2-7_00458	albA	-0.243755	2.84254	1.03559	0.30885	0.706676
L2-7_00606	pdaA	-0.242201	2.57229	1.94047	0.163617	0.617932
L2-7_00904	L2-7_00904	-0.24075	2.87134	1.05793	0.303688	0.70601
L2-7_02478	soxS_2	-0.240254	5.81596	2.30612	0.128866	0.577731
L2-7_01630	leuA_1	-0.239922	8.62937	1.60621	0.205025	0.645483
L2-7_02348	L2-7_02348	-0.239317	0.426451	0.641834	0.423047	0.775166
L2-7_00780	malR	-0.239183	3.96202	1.80355	0.179284	0.636504
L2-7_02296	ywiE_1	-0.239158	4.26483	1.25508	0.262585	0.676959
L2-7_00440	ecfT_1	-0.238454	4.08793	1.96126	0.161378	0.616723
L2-7_01853	L2-7_01853	-0.237822	0.0841989	0.281738	0.595564	0.864194
L2-7_00521	L2-7_00521	-0.237425	7.55872	2.58579	0.107827	0.553984
L2-7_01809	L2-7_01809	-0.23617	3.03499	0.194307	0.659356	0.89326
L2-7_02328	L2-7_02328	-0.23617	5.7677	1.77496	0.182769	0.63953
L2-7_01460	L2-7_01460	-0.235692	1.80939	1.1679	0.279833	0.681799
L2-7_02510	L2-7_02510	-0.23539	10.008	0.753196	0.385466	0.747975
L2-7_00655	L2-7_00655	-0.235084	6.35474	3.38384	0.0658386	0.504043
L2-7_00290	dinB_2	-0.234491	1.72424	0.741966	0.389032	0.75015
L2-7_01041	mobA_2	-0.233794	6.75875	2.50415	0.113547	0.562117
L2-7_02295	L2-7_02295	-0.232772	6.23007	0.628062	0.428067	0.777346
L2-7_00961	adhE_1	-0.232049	7.82311	1.88506	0.16976	0.623029
L2-7_01878	ltrA_2	-0.231791	4.82343	0.266195	0.605896	0.866764
L2-7_01952	pucA	-0.231751	4.61425	1.193	0.274726	0.679858
L2-7_03020	L2-7_03020	-0.231669	6.87878	1.51177	0.218869	0.656355
L2-7_02325	L2-7_02325	-0.231224	0.923577	0.190173	0.662773	0.893736
L2-7_01375	L2-7_01375	-0.230795	6.20969	1.22988	0.267431	0.676959
L2-7_01420	L2-7_01420	-0.230289	2.21985	0.870317	0.350868	0.723422
L2-7_01812	L2-7_01812	-0.229886	4.58359	0.50204	0.478605	0.804565
L2-7_01383	L2-7_01383	-0.229399	5.40458	1.86705	0.171814	0.624902
L2-7_00098	L2-7_00098	-0.229336	1.05684	0.0951448	0.757736	0.919265
L2-7_02365	L2-7_02365	-0.229028	1.25356	0.690601	0.40596	0.761792
L2-7_00776	pnuC	-0.228518	5.80803	3.68438	0.0549245	0.485457
L2-7_02675	L2-7_02675	-0.228499	3.30198	1.82761	0.17641	0.632211
L2-7_02749	L2-7_02749	-0.228025	7.62676	2.58735	0.107721	0.553984
L2-7_02306	L2-7_02306	-0.227832	4.30266	1.23737	0.265979	0.676959
L2-7_02769	L2-7_02769	-0.227784	4.84579	0.841051	0.359096	0.728853
L2-7_00412	thiG	-0.227343	2.9327	1.41501	0.234227	0.665647
L2-7_00907	L2-7_00907	-0.227278	3.00459	0.998331	0.317715	0.708654
L2-7_00848	L2-7_00848	-0.227102	6.20586	1.99133	0.158202	0.616606
L2-7_00441	ykoD_1	-0.226807	5.31022	1.93467	0.164248	0.618182
L2-7_02915	L2-7_02915	-0.226648	3.31749	1.20168	0.272987	0.679858
L2-7_00829	aspC_1	-0.226522	6.67096	3.30374	0.0691221	0.506122
L2-7_02404	ftsW_3	-0.2265	7.3575	3.28952	0.0697234	0.506122
L2-7_01455	L2-7_01455	-0.226372	3.87534	0.361536	0.547654	0.849213
L2-7_02072	L2-7_02072	-0.226068	-0.261802	0.239674	0.624442	0.874564
L2-7_02520	L2-7_02520	-0.22602	4.08412	0.561335	0.453723	0.790138
L2-7_01596	ilvH_2	-0.225287	6.54635	0.839428	0.35956	0.729007
L2-7_00439	L2-7_00439	-0.224963	3.89667	1.38243	0.239687	0.66938
L2-7_00735	L2-7_00735	-0.224792	2.18993	0.995827	0.318322	0.708654
L2-7_01662	apxIB	-0.224337	3.12664	0.14858	0.699896	0.903188
L2-7_00140	hpdB	-0.223836	3.18456	1.16994	0.279414	0.681661
L2-7_02037	pbpA_2	-0.223322	6.08974	2.58601	0.107812	0.553984
L2-7_02475	L2-7_02475	-0.222568	2.47695	0.747119	0.38739	0.749632
L2-7_02692	relA_2	-0.221803	9.35632	1.34279	0.246542	0.67221
L2-7_00229	acdA_1	-0.221708	4.39834	0.962374	0.326589	0.714131
L2-7_02822	L2-7_02822	-0.221599	5.50355	1.27777	0.258314	0.676959
L2-7_01020	oppD	-0.220675	3.48418	0.916034	0.338518	0.720112
L2-7_02958	ftsH4	-0.22016	7.52022	1.28472	0.257024	0.676959
L2-7_00133	L2-7_00133	-0.220027	0.565852	0.295698	0.586592	0.86135
L2-7_00654	rsmA	-0.219631	6.24707	3.37768	0.066085	0.504551
L2-7_01763	L2-7_01763	-0.219502	6.48991	0.381772	0.536657	0.842228
L2-7_01120	L2-7_01120	-0.2191	7.98798	1.71738	0.190031	0.643478
L2-7_01339	stp_2	-0.219045	5.99257	1.76984	0.183402	0.63953
L2-7_00446	L2-7_00446	-0.218861	2.03557	0.880921	0.347949	0.723328
L2-7_00221	ilvB_1	-0.218645	9.91951	1.14273	0.285077	0.684019
L2-7_00544	L2-7_00544	-0.21797	7.15525	2.64752	0.103711	0.552974
L2-7_00759	agrA	-0.216601	3.40086	0.8601	0.353711	0.725016
L2-7_01414	bvgS_1	-0.216129	4.42652	1.35583	0.244261	0.671657
L2-7_01463	sdcS	-0.216129	1.33387	0.288193	0.591381	0.862635
L2-7_01658	L2-7_01658	-0.215615	3.14704	0.105467	0.745365	0.916615
L2-7_01823	L2-7_01823	-0.214292	7.15499	3.58895	0.0581649	0.489321
L2-7_02680	L2-7_02680	-0.214228	3.56387	1.74336	0.186713	0.640228
L2-7_02448	L2-7_02448	-0.214179	1.41707	0.355361	0.551094	0.851249
L2-7_02663	L2-7_02663	-0.214111	7.53006	2.09046	0.148222	0.604537
L2-7_01716	barA_1	-0.214109	6.22443	1.66311	0.197184	0.644704
L2-7_01035	thiE	-0.212589	2.00018	0.86761	0.351618	0.72388
L2-7_01145	recN	-0.212074	7.35353	2.85798	0.0909215	0.537276
L2-7_01742	L2-7_01742	-0.212014	3.78111	0.450767	0.501971	0.821567
L2-7_00596	L2-7_00596	-0.211736	5.76462	2.16461	0.141221	0.594901
L2-7_01641	ltrA_1	-0.211375	11.47	0.791545	0.373633	0.742213
L2-7_01821	yycF_1	-0.211119	7.06657	3.04478	0.0809973	0.529084
L2-7_02590	rmlA1_2	-0.210649	5.24652	0.631689	0.426737	0.777257
L2-7_01541	L2-7_01541	-0.210083	3.02693	0.954092	0.32868	0.714288
L2-7_00001	L2-7_00001	-0.209914	5.4437	1.59471	0.206655	0.648958
L2-7_00369	ppk_1	-0.209798	7.77	2.79404	0.0946153	0.541241
L2-7_00102	L2-7_00102	-0.20961	1.82406	0.0989854	0.753051	0.916615
L2-7_00197	L2-7_00197	-0.208838	5.45083	1.48255	0.223376	0.657191
L2-7_02700	L2-7_02700	-0.208616	4.35213	1.35866	0.243771	0.671657
L2-7_01027	araB_3	-0.207968	9.39018	0.811069	0.367804	0.735057
L2-7_02924	L2-7_02924	-0.207769	4.93543	0.396884	0.528703	0.840287
L2-7_00495	L2-7_00495	-0.207761	4.46208	1.13637	0.28642	0.684186
L2-7_00714	sigX	-0.207697	1.6158	0.479056	0.48885	0.814273
L2-7_00480	nagD	-0.207397	6.79138	1.80272	0.179384	0.636504
L2-7_02529	yhhX_2	-0.20693	3.22024	0.413331	0.520284	0.834957
L2-7_00365	sulD	-0.20626	5.53848	1.76085	0.184518	0.640228
L2-7_00064	L2-7_00064	-0.205967	0.395055	0.0924204	0.761122	0.920442
L2-7_00636	clpB_1	-0.205212	5.553	1.6169	0.203525	0.645483
L2-7_00175	ktrB_1	-0.204925	6.02777	1.98744	0.158609	0.616606
L2-7_02081	dapH	-0.20455	4.68025	1.76809	0.183618	0.63953
L2-7_02405	divIB	-0.20393	6.26174	1.38019	0.240068	0.66938
L2-7_02126	pncB2	-0.203921	8.7115	1.49945	0.220756	0.656355
L2-7_02792	hicB	-0.203913	4.91921	1.51334	0.21863	0.656355
L2-7_01199	L2-7_01199	-0.203859	4.69124	0.314182	0.575125	0.85598
L2-7_00203	L2-7_00203	-0.203687	5.2748	1.98862	0.158485	0.616606
L2-7_02701	dapE	-0.203542	6.03819	1.51306	0.218672	0.656355
L2-7_00919	L2-7_00919	-0.203445	6.86483	1.34406	0.246319	0.67221
L2-7_01039	L2-7_01039	-0.203396	4.98616	1.00829	0.315312	0.707524
L2-7_00373	ytgP	-0.203315	6.11143	0.917782	0.338058	0.720112
L2-7_00320	L2-7_00320	-0.203038	5.19346	1.27211	0.259371	0.676959
L2-7_02001	truA_1	-0.202888	5.727	2.05034	0.152172	0.609783
L2-7_02235	gltB_1	-0.202842	8.52615	0.201703	0.65335	0.891783
L2-7_02430	L2-7_02430	-0.202298	2.8961	0.774779	0.378743	0.745062
L2-7_00908	traG_1	-0.202236	4.04816	1.2712	0.259542	0.676959
L2-7_02100	L2-7_02100	-0.201854	1.82161	0.439281	0.50747	0.825095
L2-7_01879	ltrA_3	-0.20146	5.70238	0.148287	0.700178	0.903188
L2-7_01071	L2-7_01071	-0.200297	8.3931	1.47584	0.224426	0.657191
L2-7_01884	L2-7_01884	-0.200288	4.95402	0.123974	0.724764	0.913535
L2-7_02991	L2-7_02991	-0.199504	0.908423	0.590765	0.442123	0.783027
L2-7_01759	nadA	-0.198449	2.28448	0.628542	0.427891	0.777346
L2-7_01824	L2-7_01824	-0.197818	6.36442	3.09439	0.0785628	0.525578
L2-7_01056	cls_1	-0.197636	6.10971	2.16265	0.141401	0.594901
L2-7_01140	L2-7_01140	-0.197481	6.43807	1.79536	0.180274	0.637788
L2-7_02165	L2-7_02165	-0.197254	6.04904	1.01539	0.313616	0.707207
L2-7_02575	dnaG_4	-0.196837	-0.00478438	0.31994	0.571644	0.85598
L2-7_01169	cgkA_5	-0.196362	7.54875	1.35941	0.24364	0.671657
L2-7_02613	znuA	-0.194479	4.41085	0.920736	0.337282	0.720112
L2-7_00354	L2-7_00354	-0.193773	6.47972	1.97168	0.16027	0.616723
L2-7_02364	L2-7_02364	-0.19372	1.01898	0.602094	0.43778	0.780502
L2-7_02316	L2-7_02316	-0.193658	1.28081	0.281273	0.595868	0.864194
L2-7_01567	L2-7_01567	-0.192756	1.60436	0.641217	0.42327	0.775166
L2-7_02996	L2-7_02996	-0.192672	3.98467	1.8574	0.172926	0.626827
L2-7_00051	dinB_1	-0.192651	8.36737	0.477255	0.489668	0.814273
L2-7_02031	L2-7_02031	-0.191952	4.41104	0.947219	0.330428	0.714842
L2-7_01914	manP	-0.191889	5.14565	1.87142	0.171312	0.624902
L2-7_01553	pncC	-0.191875	8.50884	0.854877	0.355176	0.725366
L2-7_00281	L2-7_00281	-0.191368	0.753875	0.494462	0.481944	0.808626
L2-7_02846	L2-7_02846	-0.190924	2.63281	0.541259	0.461912	0.79528
L2-7_01240	L2-7_01240	-0.190822	6.78817	1.66618	0.196771	0.644704
L2-7_03050	L2-7_03050	-0.190089	1.80223	0.346996	0.555818	0.85326
L2-7_00482	araB_1	-0.189838	2.8728	1.05607	0.304113	0.70601
L2-7_01657	drrA_3	-0.189261	3.90083	0.0819817	0.77463	0.923463
L2-7_01533	L2-7_01533	-0.188657	2.87019	0.285766	0.592946	0.862635
L2-7_02552	mrcA	-0.188202	10.0579	1.05184	0.305084	0.706045
L2-7_01042	xdhA	-0.187916	8.98247	1.28202	0.257523	0.676959
L2-7_02339	L2-7_02339	-0.186764	4.34359	1.25486	0.262625	0.676959
L2-7_02782	porA	-0.18628	3.63253	0.680576	0.409389	0.764738
L2-7_00037	minC	-0.186096	7.57907	2.13378	0.144085	0.597081
L2-7_01177	L2-7_01177	-0.185832	6.6707	1.03611	0.308729	0.706676
L2-7_01091	L2-7_01091	-0.185594	8.09073	1.748	0.186128	0.640228
L2-7_01343	L2-7_01343	-0.185033	5.17632	0.956484	0.328074	0.714269
L2-7_01595	ilvB_2	-0.184677	9.08211	0.527144	0.46781	0.798229
L2-7_02567	L2-7_02567	-0.184645	8.72673	1.44289	0.229672	0.6641
L2-7_01540	L2-7_01540	-0.184125	0.567383	0.420425	0.516725	0.832105
L2-7_00903	L2-7_00903	-0.184044	3.64073	0.617696	0.431905	0.778128
L2-7_01478	iscR_1	-0.18401	1.01298	0.234121	0.628485	0.877479
L2-7_01326	L2-7_01326	-0.183062	5.84027	0.527457	0.467678	0.798229
L2-7_02186	L2-7_02186	-0.182888	2.35935	0.455787	0.4996	0.818709
L2-7_00397	L2-7_00397	-0.182883	3.85053	1.20331	0.272661	0.679858
L2-7_02383	ybhF_3	-0.18281	6.72204	0.882035	0.347645	0.723328
L2-7_01228	L2-7_01228	-0.182428	4.7299	0.5249	0.468759	0.798229
L2-7_01405	dinB_4	-0.181617	4.53624	1.39434	0.237673	0.669307
L2-7_02888	graS	-0.181318	3.4796	0.875158	0.349531	0.723328
L2-7_01928	ybaK	-0.180293	5.44718	0.217718	0.640784	0.886216
L2-7_01170	L2-7_01170	-0.180121	6.76232	2.21988	0.136243	0.594901
L2-7_01712	L2-7_01712	-0.17987	7.49368	1.19212	0.274903	0.679858
L2-7_00219	leuB	-0.179867	8.75789	0.722938	0.395182	0.754484
L2-7_03055	uvrB_2	-0.179346	1.79013	0.911773	0.339644	0.720112
L2-7_02637	L2-7_02637	-0.179335	1.15425	0.28637	0.592556	0.862635
L2-7_02939	ylbJ	-0.17931	7.26534	2.59223	0.107389	0.553984
L2-7_01132	trkA	-0.179023	6.9161	2.15009	0.142562	0.597081
L2-7_02033	ruvB	-0.178771	6.23127	1.20434	0.272457	0.679858
L2-7_03025	L2-7_03025	-0.178195	0.338616	0.287312	0.591948	0.862635
L2-7_00947	L2-7_00947	-0.177348	4.38913	1.29396	0.25532	0.676371
L2-7_01332	L2-7_01332	-0.177198	6.70607	0.694234	0.404728	0.761106
L2-7_00383	L2-7_00383	-0.177136	2.85033	0.176841	0.674102	0.896032
L2-7_02439	L2-7_02439	-0.176468	6.48345	0.948909	0.329997	0.714569
L2-7_02945	feoB_2	-0.176191	6.72776	0.945355	0.330904	0.714876
L2-7_02890	yxdM	-0.176136	3.82316	1.14365	0.284882	0.684019
L2-7_01726	phoR_2	-0.175818	5.53017	1.51789	0.217939	0.656355
L2-7_01025	degA_1	-0.175107	3.66999	0.876692	0.349109	0.723328
L2-7_01372	L2-7_01372	-0.174703	6.55036	1.03661	0.308612	0.706676
L2-7_00353	metH_1	-0.174464	7.46867	1.76836	0.183586	0.63953
L2-7_01852	L2-7_01852	-0.174043	0.848323	0.372556	0.541614	0.843094
L2-7_02947	norM_2	-0.173627	3.06681	1.04231	0.307284	0.706676
L2-7_02838	L2-7_02838	-0.173125	0.782272	0.177882	0.6732	0.896032
L2-7_00305	L2-7_00305	-0.17301	5.49403	0.730157	0.392832	0.753034
L2-7_01813	L2-7_01813	-0.172407	4.71069	0.64246	0.422821	0.775166
L2-7_00873	L2-7_00873	-0.172126	3.44109	0.512558	0.474034	0.803288
L2-7_02911	uvrB_1	-0.17176	8.40276	1.35833	0.243828	0.671657
L2-7_00318	L2-7_00318	-0.171582	4.28976	0.277184	0.598553	0.866294
L2-7_02294	fumA	-0.171389	7.27474	1.27118	0.259545	0.676959
L2-7_02568	L2-7_02568	-0.17126	8.92115	1.04553	0.306539	0.706676
L2-7_02563	fgs_2	-0.171114	7.61149	1.15636	0.282221	0.682297
L2-7_02228	L2-7_02228	-0.170293	1.87098	0.33095	0.5651	0.85525
L2-7_02860	fsaA	-0.169936	5.71653	1.54222	0.214287	0.656355
L2-7_00642	L2-7_00642	-0.169653	6.2041	0.562656	0.453192	0.789704
L2-7_01714	L2-7_01714	-0.169563	6.46146	1.09692	0.294944	0.692315
L2-7_01698	gph_2	-0.169333	6.62841	1.15756	0.281973	0.682286
L2-7_00653	ycfH_2	-0.169122	4.75854	1.17588	0.278195	0.6815
L2-7_00366	pheA	-0.169096	5.74497	1.25684	0.26225	0.676959
L2-7_01717	sdpR	-0.168951	4.36872	1.31404	0.251665	0.675575
L2-7_00340	yrbG_1	-0.168452	6.52371	1.54063	0.214525	0.656355
L2-7_02759	L2-7_02759	-0.167972	7.0803	0.997323	0.317959	0.708654
L2-7_00106	L2-7_00106	-0.167874	2.55492	0.326299	0.567846	0.855813
L2-7_03080	L2-7_03080	-0.167013	5.75285	0.203299	0.652071	0.891477
L2-7_02464	L2-7_02464	-0.166955	7.15157	0.911691	0.339666	0.720112
L2-7_01090	L2-7_01090	-0.165904	8.7156	1.1003	0.2942	0.691567
L2-7_03032	L2-7_03032	-0.165329	3.8973	0.322314	0.57022	0.85598
L2-7_02064	regX3	-0.164961	2.81706	0.474905	0.490739	0.815001
L2-7_00168	pdaC	-0.164489	8.63848	1.00557	0.315968	0.708273
L2-7_02401	spoVD_2	-0.163913	6.55437	1.74508	0.186497	0.640228
L2-7_00131	L2-7_00131	-0.163846	0.344088	0.206118	0.649827	0.889505
L2-7_01746	spoVT	-0.162873	5.45479	1.37954	0.240179	0.66938
L2-7_01034	L2-7_01034	-0.16285	1.71665	0.412612	0.520647	0.834968
L2-7_01019	oppF	-0.161906	3.32932	0.554483	0.456492	0.790939
L2-7_02928	L2-7_02928	-0.161662	3.97511	0.885704	0.346644	0.723328
L2-7_01794	cobC	-0.161386	4.24154	0.5835	0.444944	0.783774
L2-7_00906	L2-7_00906	-0.161159	2.71681	0.553965	0.456702	0.790939
L2-7_02090	L2-7_02090	-0.160696	3.23461	0.272958	0.601354	0.866442
L2-7_01549	spoIIIE	-0.160579	7.89066	1.10559	0.293044	0.690587
L2-7_00686	L2-7_00686	-0.160154	4.38626	0.951707	0.329285	0.714288
L2-7_02824	L2-7_02824	-0.158905	3.74978	0.336895	0.561627	0.853868
L2-7_02331	L2-7_02331	-0.158891	5.63237	1.30944	0.252496	0.675575
L2-7_02340	L2-7_02340	-0.158431	4.2119	0.566171	0.451785	0.788459
L2-7_00288	L2-7_00288	-0.158365	2.6853	0.528625	0.467185	0.798229
L2-7_00009	pyrC	-0.158018	7.64282	0.982593	0.32156	0.709194
L2-7_02225	L2-7_02225	-0.157969	1.06807	0.139524	0.708755	0.907042
L2-7_02125	cat3	-0.157598	6.17655	1.208	0.271728	0.679858
L2-7_00352	yitJ	-0.157556	6.89054	1.26683	0.260362	0.676959
L2-7_01016	L2-7_01016	-0.157337	6.67319	1.20068	0.273185	0.679858
L2-7_02602	L2-7_02602	-0.156905	1.66775	0.509291	0.475446	0.803288
L2-7_03040	L2-7_03040	-0.156508	4.25229	0.316496	0.573721	0.85598
L2-7_02550	yehU_4	-0.156484	1.79331	0.284937	0.593483	0.862968
L2-7_01682	L2-7_01682	-0.155731	3.2942	0.32258	0.570061	0.85598
L2-7_01333	L2-7_01333	-0.154824	7.27527	0.540367	0.462281	0.79528
L2-7_01551	rimO	-0.154115	8.76883	0.896966	0.343597	0.721707
L2-7_01429	L2-7_01429	-0.153609	1.14495	0.28306	0.594702	0.863397
L2-7_01592	fbp	-0.153575	8.25965	1.29418	0.25528	0.676371
L2-7_00390	L2-7_00390	-0.152994	8.23657	1.1085	0.292409	0.689671
L2-7_00840	yxlF_2	-0.152902	4.5154	0.195232	0.658598	0.892787
L2-7_00388	topA	-0.152204	8.27137	0.789339	0.3743	0.742213
L2-7_00442	L2-7_00442	-0.151654	4.21662	0.590116	0.442374	0.783027
L2-7_01640	luxQ_2	-0.1512	4.35154	0.71448	0.397961	0.756662
L2-7_00292	L2-7_00292	-0.15084	1.00791	0.166489	0.683251	0.898913
L2-7_00733	mta_1	-0.150514	4.26138	0.61348	0.43348	0.778723
L2-7_01725	saeR	-0.14983	5.06746	1.3837	0.239471	0.66938
L2-7_02246	aroE_3	-0.149747	3.79667	0.170563	0.679612	0.898905
L2-7_00713	L2-7_00713	-0.149604	4.02102	0.994072	0.318749	0.708837
L2-7_01745	lipR	-0.149395	5.70654	1.14814	0.283938	0.684019
L2-7_02218	L2-7_02218	-0.149117	5.48119	0.662407	0.415711	0.770896
L2-7_00426	L2-7_00426	-0.148931	1.17362	0.269136	0.603912	0.866442
L2-7_02342	L2-7_02342	-0.148836	0.600941	0.262779	0.608217	0.866764
L2-7_00737	L2-7_00737	-0.148077	2.37203	0.528981	0.467036	0.798229
L2-7_02889	yxdL	-0.147584	2.6069	0.58243	0.445361	0.783774
L2-7_02233	cfa	-0.147563	3.41425	0.460859	0.497223	0.817617
L2-7_03021	L2-7_03021	-0.145907	2.26115	0.180338	0.671083	0.895123
L2-7_02427	dfx	-0.145865	10.3037	0.180062	0.67132	0.895123
L2-7_03018	cpsB	-0.14567	2.05033	0.159484	0.689632	0.900209
L2-7_01734	arnC	-0.145223	8.88225	0.804493	0.369754	0.737402
L2-7_00367	ltaS_1	-0.145018	7.08994	1.01927	0.312693	0.707207
L2-7_00327	nudC	-0.144826	4.67245	0.195798	0.658134	0.89269
L2-7_00993	L2-7_00993	-0.144792	6.71261	0.448492	0.503052	0.821896
L2-7_01334	L2-7_01334	-0.144754	6.67165	0.535885	0.464143	0.796369
L2-7_02374	yedA	-0.144648	5.68535	0.756646	0.38438	0.747077
L2-7_00311	ycfH_1	-0.144521	4.23747	0.338739	0.560558	0.85326
L2-7_00832	L2-7_00832	-0.144052	6.02086	1.43748	0.230548	0.6641
L2-7_00516	L2-7_00516	-0.14404	5.58213	0.685575	0.407674	0.76306
L2-7_02313	mepA_11	-0.143629	5.00227	0.525945	0.468317	0.798229
L2-7_01964	L2-7_01964	-0.143259	5.77357	0.553912	0.456724	0.790939
L2-7_00210	licR_1	-0.142853	6.28697	1.30545	0.25322	0.675575
L2-7_01962	lytG_2	-0.141738	7.62833	0.574591	0.44844	0.786177
L2-7_01890	L2-7_01890	-0.141594	0.408215	0.118626	0.730529	0.916615
L2-7_02457	rpoC	-0.141565	11.956	0.59515	0.440435	0.782501
L2-7_03049	L2-7_03049	-0.140365	4.29825	0.200847	0.654038	0.891783
L2-7_02307	L2-7_02307	-0.140188	3.35496	0.417079	0.518398	0.833918
L2-7_00595	L2-7_00595	-0.139787	6.43548	1.22286	0.2688	0.678538
L2-7_02823	L2-7_02823	-0.139435	0.750614	0.163532	0.685926	0.899651
L2-7_01147	ppnK	-0.13916	7.37515	1.0238	0.311619	0.707207
L2-7_00247	L2-7_00247	-0.13912	4.69957	0.394462	0.529963	0.840628
L2-7_00863	L2-7_00863	-0.138849	9.00541	0.552247	0.457401	0.791192
L2-7_00170	copY	-0.138831	5.45646	0.350665	0.553737	0.851576
L2-7_02581	L2-7_02581	-0.138451	6.67575	0.606587	0.436076	0.779869
L2-7_01949	yheS_1	-0.138249	5.68059	0.5503	0.458195	0.791192
L2-7_02909	L2-7_02909	-0.137881	0.934332	0.136997	0.711285	0.907449
L2-7_01260	L2-7_01260	-0.137438	4.48792	0.498581	0.480124	0.80654
L2-7_01790	ffh	-0.136387	7.58339	0.61796	0.431806	0.778128
L2-7_02914	L2-7_02914	-0.135231	2.47851	0.13188	0.71649	0.909654
L2-7_01043	hcrC	-0.135067	6.11165	0.761799	0.382766	0.746874
L2-7_01550	folD	-0.134737	8.13885	0.789714	0.374186	0.742213
L2-7_02830	L2-7_02830	-0.134656	0.715619	0.169236	0.680792	0.898913
L2-7_01394	L2-7_01394	-0.133934	6.55885	0.6634	0.415362	0.770758
L2-7_00548	L2-7_00548	-0.133187	5.82703	0.222687	0.637	0.883729
L2-7_01046	rny	-0.133018	11.8592	0.355435	0.551053	0.851249
L2-7_02790	gcdB	-0.132673	10.4246	0.310304	0.577494	0.85598
L2-7_00758	L2-7_00758	-0.132353	3.54214	0.622024	0.430296	0.777808
L2-7_01293	L2-7_01293	-0.132192	2.96225	0.253795	0.614415	0.868178
L2-7_00216	L2-7_00216	-0.132005	5.18061	0.810227	0.368053	0.735057
L2-7_01656	L2-7_01656	-0.131787	3.99987	0.0320483	0.857922	0.959256
L2-7_00784	lacA_1	-0.13125	3.18788	0.354647	0.551494	0.851398
L2-7_00715	L2-7_00715	-0.130817	4.10292	0.294479	0.587364	0.861673
L2-7_01731	paaK	-0.130409	5.36179	0.485892	0.485765	0.812121
L2-7_02332	purL	-0.130189	11.3641	0.337187	0.561457	0.853868
L2-7_02078	nadE	-0.130083	6.84624	0.946414	0.330634	0.714842
L2-7_01233	L2-7_01233	-0.12945	1.63736	0.236499	0.626746	0.876213
L2-7_01342	L2-7_01342	-0.129244	6.35834	0.594563	0.44066	0.782501
L2-7_01235	L2-7_01235	-0.128812	1.37037	0.364501	0.546017	0.847143
L2-7_00297	ntcA_1	-0.12873	6.27995	0.214731	0.643085	0.886216
L2-7_03031	L2-7_03031	-0.128192	3.23605	0.181825	0.66981	0.895123
L2-7_01539	csiR	-0.127788	4.9644	0.296514	0.586076	0.861135
L2-7_02227	dut	-0.127475	1.65513	0.275403	0.59973	0.866442
L2-7_02035	yhbU_2	-0.126851	7.16487	0.818494	0.365621	0.73421
L2-7_01736	L2-7_01736	-0.126467	8.03086	0.729592	0.393015	0.753034
L2-7_02293	ttdA_2	-0.126147	8.67036	0.669814	0.413117	0.768627
L2-7_03004	L2-7_03004	-0.125315	4.98462	0.540194	0.462352	0.79528
L2-7_01118	rsgA	-0.124938	7.19296	0.78339	0.376106	0.742681
L2-7_00178	yxeP	-0.124725	6.77535	0.902672	0.342066	0.720112
L2-7_00834	spoVB	-0.124328	6.78174	1.11927	0.290076	0.687637
L2-7_00174	corC_2	-0.124292	5.39702	0.598488	0.439155	0.782025
L2-7_01454	L2-7_01454	-0.123997	3.3589	0.0963456	0.75626	0.918925
L2-7_00360	recO	-0.123775	6.21245	0.764911	0.381796	0.74602
L2-7_00368	gppA	-0.123643	6.75393	1.06478	0.302128	0.703125
L2-7_01825	L2-7_01825	-0.123602	5.8718	0.597391	0.439575	0.782025
L2-7_00411	L2-7_00411	-0.123402	0.173026	0.185943	0.666315	0.893736
L2-7_02384	L2-7_02384	-0.123072	8.25541	0.332978	0.563911	0.85525
L2-7_01963	mdeA_3	-0.122992	8.05868	0.312776	0.575982	0.85598
L2-7_01152	xseA	-0.122599	7.98946	0.774089	0.378955	0.745062
L2-7_02867	L2-7_02867	-0.122182	2.81476	0.439951	0.507146	0.825095
L2-7_02821	L2-7_02821	-0.122116	5.29275	0.493772	0.482249	0.808655
L2-7_02011	L2-7_02011	-0.122026	7.20439	1.24446	0.264614	0.676959
L2-7_01340	stkP	-0.122018	6.47031	0.634455	0.425726	0.777257
L2-7_02910	uvrA	-0.122015	8.84313	0.581837	0.445593	0.783774
L2-7_00802	cobQ	-0.121337	6.99487	0.435008	0.509542	0.825987
L2-7_02655	cas1_3	-0.120292	2.36228	0.377079	0.539171	0.842228
L2-7_02667	tsaA	-0.120212	4.75912	0.783606	0.376041	0.742681
L2-7_01254	L2-7_01254	-0.120178	3.68332	0.221385	0.637987	0.883828
L2-7_02894	L2-7_02894	-0.120171	6.39451	0.0275438	0.868186	0.964574
L2-7_01864	L2-7_01864	-0.119733	5.57268	0.768804	0.380587	0.745217
L2-7_01304	cmpR_1	-0.119662	5.87601	0.804672	0.3697	0.737402
L2-7_02783	porB	-0.119547	4.60133	0.577142	0.447435	0.785042
L2-7_01957	L2-7_01957	-0.119522	3.49443	0.492097	0.482994	0.808801
L2-7_00542	L2-7_00542	-0.119224	6.37856	0.435146	0.509475	0.825987
L2-7_02804	ybhF_4	-0.118663	0.65993	0.2069	0.649208	0.889091
L2-7_02623	L2-7_02623	-0.118618	10.0757	0.488472	0.48461	0.810672
L2-7_00012	L2-7_00012	-0.118459	5.426	0.691267	0.405734	0.761792
L2-7_01715	L2-7_01715	-0.118229	6.5321	0.526767	0.467969	0.798229
L2-7_02539	L2-7_02539	-0.118051	2.09703	0.317912	0.572865	0.85598
L2-7_01107	gmk	-0.118018	7.36581	0.83192	0.361718	0.731755
L2-7_00029	L2-7_00029	-0.117555	6.38775	0.610274	0.434685	0.779331
L2-7_02708	L2-7_02708	-0.117456	2.56079	0.317046	0.573388	0.85598
L2-7_01475	cysD_2	-0.116782	2.54568	0.0750796	0.78408	0.925829
L2-7_01335	L2-7_01335	-0.116637	4.65727	0.313352	0.57563	0.85598
L2-7_03078	L2-7_03078	-0.116264	3.65918	0.066375	0.79669	0.931355
L2-7_01979	glnP	-0.116094	10.9351	0.437735	0.508218	0.8255
L2-7_00765	L2-7_00765	-0.116092	2.66485	0.297582	0.585402	0.86106
L2-7_01601	L2-7_01601	-0.116068	4.46282	0.199265	0.655315	0.892222
L2-7_00778	adaA	-0.11605	2.4844	0.213653	0.643919	0.886283
L2-7_00672	L2-7_00672	-0.115791	5.18946	0.520201	0.470756	0.8004
L2-7_01258	L2-7_01258	-0.115691	5.76945	0.903397	0.341872	0.720112
L2-7_01448	L2-7_01448	-0.115033	-0.0655857	0.0432305	0.835292	0.946392
L2-7_02470	L2-7_02470	-0.114929	3.67494	0.263115	0.607988	0.866764
L2-7_00749	L2-7_00749	-0.114607	3.77088	0.127248	0.721303	0.912638
L2-7_01519	L2-7_01519	-0.114464	5.66062	0.299405	0.584255	0.860717
L2-7_01166	smc_2	-0.114346	8.25112	0.622361	0.430171	0.777808
L2-7_02329	luxS	-0.114215	6.73838	0.394981	0.529693	0.840628
L2-7_01117	prkC_2	-0.113836	8.78834	0.462923	0.496261	0.816738
L2-7_02498	L2-7_02498	-0.112917	3.51118	0.372756	0.541506	0.843094
L2-7_01423	L2-7_01423	-0.11261	7.65844	0.50191	0.478662	0.804565
L2-7_00856	L2-7_00856	-0.112116	10.0242	0.0687468	0.79317	0.93068
L2-7_02611	L2-7_02611	-0.112092	4.5	0.445571	0.504446	0.822734
L2-7_00306	L2-7_00306	-0.111809	6.2885	0.521707	0.470114	0.799794
L2-7_02653	L2-7_02653	-0.11155	0.794884	0.158144	0.690871	0.900209
L2-7_01330	rhaR	-0.111236	6.10991	0.571122	0.449813	0.787151
L2-7_01647	L2-7_01647	-0.111154	3.25757	0.271181	0.60254	0.866442
L2-7_02816	rlmCD_3	-0.11104	6.73251	0.641491	0.423171	0.775166
L2-7_02931	L2-7_02931	-0.110468	5.41857	0.389956	0.532323	0.840628
L2-7_00702	L2-7_00702	-0.110337	2.02732	0.254584	0.613866	0.868178
L2-7_00998	tadA_2	-0.109939	7.85283	0.338665	0.560601	0.85326
L2-7_00656	tadA_1	-0.109932	4.69106	0.766817	0.381203	0.745902
L2-7_00356	ilvH_1	-0.109796	7.24718	0.740664	0.389448	0.75015
L2-7_00943	L2-7_00943	-0.10916	6.97477	0.550128	0.458265	0.791192
L2-7_01699	sspC2	-0.109109	6.99096	0.378364	0.53848	0.842228
L2-7_02962	cfiA	-0.10905	2.49838	0.392661	0.530904	0.840628
L2-7_01131	trkG	-0.108828	6.91271	0.890794	0.345262	0.723328
L2-7_02974	nagA	-0.108695	5.13981	0.353985	0.551866	0.851502
L2-7_02127	L2-7_02127	-0.108686	6.88825	0.605043	0.43666	0.780308
L2-7_01841	L2-7_01841	-0.108576	2.08877	0.340013	0.559822	0.85326
L2-7_01898	htrB	-0.108527	7.94077	0.200005	0.654716	0.892009
L2-7_02732	ltaS1_2	-0.108237	6.05171	0.315407	0.574381	0.85598
L2-7_00984	murR_1	-0.108094	7.3323	0.167203	0.68261	0.898913
L2-7_02750	L2-7_02750	-0.107971	6.92235	0.92582	0.335951	0.720112
L2-7_00093	L2-7_00093	-0.107767	0.427755	0.0347609	0.852098	0.957175
L2-7_02771	ldh_2	-0.106862	2.23321	0.297082	0.585718	0.86106
L2-7_00304	L2-7_00304	-0.106391	5.83081	0.511049	0.474685	0.803288
L2-7_01623	L2-7_01623	-0.106055	6.71205	0.644342	0.422143	0.775166
L2-7_02993	L2-7_02993	-0.105881	9.18937	0.377426	0.538984	0.842228
L2-7_01428	L2-7_01428	-0.105729	7.53917	0.3581	0.549563	0.850299
L2-7_02330	L2-7_02330	-0.105711	5.08264	0.427044	0.513443	0.828726
L2-7_02741	tnpR_3	-0.105189	1.08281	0.13994	0.708341	0.907042
L2-7_01935	L2-7_01935	-0.104768	5.77398	0.376945	0.539243	0.842228
L2-7_01246	L2-7_01246	-0.104712	6.37303	0.582089	0.445494	0.783774
L2-7_01146	argR	-0.104272	6.12633	0.531931	0.465796	0.797775
L2-7_01095	L2-7_01095	-0.103653	5.34494	0.379958	0.537625	0.842228
L2-7_02099	dinB_5	-0.103581	4.16799	0.347276	0.555659	0.85326
L2-7_01218	ydfH_1	-0.103544	7.26496	0.350944	0.553579	0.851576
L2-7_01251	mepA_7	-0.103436	5.84911	0.51273	0.47396	0.803288
L2-7_02456	rpoB	-0.102637	11.9706	0.319112	0.572142	0.85598
L2-7_02622	clsA	-0.102604	2.96806	0.192959	0.660465	0.893736
L2-7_02380	mutX	-0.102569	2.69213	0.187136	0.665311	0.893736
L2-7_00547	L2-7_00547	-0.102258	5.46741	0.120371	0.728632	0.91635
L2-7_00323	L2-7_00323	-0.101966	6.80696	0.16184	0.687468	0.899651
L2-7_01349	L2-7_01349	-0.101441	5.01654	0.241673	0.623	0.874564
L2-7_02359	L2-7_02359	-0.101342	0.315665	0.0158506	0.899812	0.969006
L2-7_00965	srlR_1	-0.100575	8.40083	0.387003	0.533879	0.840882
L2-7_01176	lacA_2	-0.100515	5.3277	0.215523	0.642473	0.886216
L2-7_01087	L2-7_01087	-0.100221	6.83545	0.263621	0.607643	0.866764
L2-7_01959	phoR_3	-0.0997641	6.71977	0.765728	0.381542	0.74602
L2-7_02726	L2-7_02726	-0.0996838	4.43851	0.35809	0.549569	0.850299
L2-7_00459	drrA_1	-0.0993398	1.61482	0.100087	0.751726	0.916615
L2-7_01948	hgdC_1	-0.0991511	8.75732	0.250422	0.616778	0.869322
L2-7_00241	L2-7_00241	-0.0990865	2.2253	0.260237	0.609957	0.867124
L2-7_02973	ybbH_2	-0.0988999	3.79274	0.234079	0.628516	0.877479
L2-7_00697	L2-7_00697	-0.0986944	6.59185	0.334906	0.562784	0.855163
L2-7_00034	mrdB	-0.098616	7.65321	0.470384	0.492811	0.815001
L2-7_02566	L2-7_02566	-0.0983651	7.57658	0.428054	0.512945	0.828399
L2-7_02366	spo0C_5	-0.0974677	0.860683	0.0936885	0.759539	0.919719
L2-7_01238	L2-7_01238	-0.0972713	0.386447	0.0755649	0.7834	0.925829
L2-7_01384	def_2	-0.0967972	4.98925	0.371221	0.54234	0.843305
L2-7_00010	L2-7_00010	-0.0967496	8.15219	0.439024	0.507594	0.825095
L2-7_00378	rnfD	-0.0961984	8.22982	0.275411	0.599725	0.866442
L2-7_00382	rnfB	-0.095855	8.25532	0.269816	0.603455	0.866442
L2-7_01792	rbr	-0.0958423	10.4444	0.101038	0.750587	0.916615
L2-7_00597	L2-7_00597	-0.0957345	4.89787	0.344888	0.557021	0.85326
L2-7_00303	L2-7_00303	-0.0956435	3.26111	0.22807	0.632959	0.880611
L2-7_00476	fliU	-0.095567	4.8848	0.482689	0.487207	0.81356
L2-7_01537	L2-7_01537	-0.0953358	3.03814	0.196092	0.657894	0.89269
L2-7_00217	guaB	-0.0952577	9.55745	0.143252	0.705069	0.907042
L2-7_01955	hisH1	-0.0949458	4.9771	0.129439	0.719014	0.911229
L2-7_01711	L2-7_01711	-0.0943549	4.26426	0.261639	0.608997	0.866764
L2-7_01508	cadA	-0.0941201	7.28007	0.333169	0.563799	0.85525
L2-7_01900	lytR_1	-0.093913	8.21594	0.555152	0.45622	0.790939
L2-7_02187	L2-7_02187	-0.0937078	2.23475	0.141717	0.70658	0.907042
L2-7_00434	mbtB_3	-0.0935607	2.08287	0.142225	0.706079	0.907042
L2-7_01407	L2-7_01407	-0.0934962	5.10914	0.109776	0.740399	0.916615
L2-7_00694	L2-7_00694	-0.0931754	1.57842	0.158177	0.69084	0.900209
L2-7_00478	L2-7_00478	-0.0926715	7.08331	0.136514	0.711771	0.907449
L2-7_03014	L2-7_03014	-0.0926272	3.6181	0.0773805	0.780879	0.92556
L2-7_01223	dnaX_2	-0.092495	8.95639	0.340271	0.559673	0.85326
L2-7_02548	L2-7_02548	-0.0923863	1.70657	0.196883	0.657248	0.89269
L2-7_01484	iscR_2	-0.0923522	6.36718	0.44903	0.502796	0.821896
L2-7_00545	mprA	-0.0923026	1.26099	0.0862605	0.768986	0.923062
L2-7_00994	lytG_1	-0.0918925	7.68603	0.309822	0.57779	0.85598
L2-7_00308	L2-7_00308	-0.0917888	6.21242	0.42155	0.516165	0.832105
L2-7_02851	dhaS	-0.0915848	4.29193	0.252399	0.615391	0.868178
L2-7_02101	L2-7_02101	-0.0913105	0.863294	0.0643506	0.799747	0.932539
L2-7_02260	L2-7_02260	-0.0906557	1.22005	0.175226	0.675509	0.896968
L2-7_02571	L2-7_02571	-0.0901163	4.93834	0.18889	0.663842	0.893736
L2-7_01612	lexA_2	-0.0901056	8.44732	0.372521	0.541633	0.843094
L2-7_01305	L2-7_01305	-0.0900123	7.01565	0.449903	0.502381	0.821758
L2-7_01097	spoIVA	-0.0896566	6.50622	0.416701	0.518588	0.833918
L2-7_03028	L2-7_03028	-0.0895378	2.47826	0.084803	0.770891	0.923062
L2-7_00143	L2-7_00143	-0.0892333	2.17286	0.165522	0.684123	0.898913
L2-7_02400	spoVD_1	-0.0889267	6.65102	0.730743	0.392642	0.753034
L2-7_01427	L2-7_01427	-0.0882157	6.16928	0.356074	0.550695	0.851249
L2-7_01563	L2-7_01563	-0.0881829	6.89257	0.298226	0.584996	0.86106
L2-7_00550	L2-7_00550	-0.0879206	3.04231	0.111573	0.738361	0.916615
L2-7_00163	L2-7_00163	-0.0877607	6.79505	0.469941	0.493014	0.815001
L2-7_02312	L2-7_02312	-0.0874947	3.86469	0.287481	0.591839	0.862635
L2-7_00364	folP	-0.0871453	5.49243	0.388417	0.533133	0.840651
L2-7_00245	L2-7_00245	-0.0870436	8.12467	0.393664	0.53038	0.840628
L2-7_00905	L2-7_00905	-0.086785	2.3896	0.114294	0.735308	0.916615
L2-7_02301	L2-7_02301	-0.0867754	7.41938	0.203604	0.651827	0.891477
L2-7_02628	L2-7_02628	-0.0861022	2.54006	0.0947847	0.75818	0.919265
L2-7_01341	L2-7_01341	-0.08605	4.82505	0.195708	0.658208	0.89269
L2-7_00869	L2-7_00869	-0.0857657	2.25528	0.119297	0.729799	0.916615
L2-7_02173	ssb_4	-0.0844749	0.501043	0.0614492	0.80422	0.934255
L2-7_00176	ktrA_1	-0.0843083	5.02588	0.352245	0.552845	0.851576
L2-7_01655	phoR_1	-0.0842272	1.58243	0.17985	0.671502	0.895123
L2-7_01766	deoR_2	-0.0833272	6.90075	0.331762	0.564623	0.85525
L2-7_02089	L2-7_02089	-0.0832904	4.30422	0.043076	0.835582	0.946392
L2-7_01144	spoIVB	-0.0832461	2.97734	0.165441	0.684195	0.898913
L2-7_02791	L2-7_02791	-0.0830205	11.0135	0.140549	0.707736	0.907042
L2-7_01851	L2-7_01851	-0.0829664	2.02045	0.0797159	0.777683	0.924117
L2-7_01578	L2-7_01578	-0.0827253	2.10098	0.189146	0.663628	0.893736
L2-7_02672	L2-7_02672	-0.082526	5.34564	0.340213	0.559707	0.85326
L2-7_01827	hemN	-0.0825004	4.6056	0.286764	0.592302	0.862635
L2-7_00056	trmK	-0.0821454	3.92338	0.263963	0.60741	0.866764
L2-7_01511	ttuE	-0.0820351	6.03433	0.35875	0.549201	0.850299
L2-7_02028	cobB_2	-0.0813924	5.54349	0.232624	0.629585	0.878097
L2-7_03005	L2-7_03005	-0.0811211	5.56299	0.256472	0.612554	0.868178
L2-7_02752	L2-7_02752	-0.081057	6.62741	0.351969	0.553001	0.851576
L2-7_01248	mepA_6	-0.0810393	7.70547	0.320744	0.571161	0.85598
L2-7_02828	mtrR_2	-0.0810038	3.35988	0.117906	0.731317	0.916615
L2-7_02533	L2-7_02533	-0.0809593	4.87189	0.256644	0.612435	0.868178
L2-7_01119	thiN	-0.0808875	7.21385	0.279232	0.597205	0.865685
L2-7_02289	L2-7_02289	-0.0805952	4.1132	0.124702	0.72399	0.913535
L2-7_01382	L2-7_01382	-0.0802085	7.59574	0.215852	0.642219	0.886216
L2-7_02774	L2-7_02774	-0.0796952	2.26629	0.0825134	0.77392	0.923463
L2-7_00050	L2-7_00050	-0.0796805	7.30072	0.100251	0.751529	0.916615
L2-7_02997	L2-7_02997	-0.078994	2.64199	0.116222	0.733168	0.916615
L2-7_01968	L2-7_01968	-0.0789289	5.14059	0.211654	0.645474	0.886283
L2-7_01353	macB_2	-0.0786343	8.25525	0.297254	0.585609	0.86106
L2-7_02501	L2-7_02501	-0.0783776	2.97643	0.0595509	0.807207	0.935192
L2-7_02299	ttcA_1	-0.0782948	4.1668	0.271656	0.602223	0.866442
L2-7_02415	adrA_2	-0.0782942	5.85534	0.0530383	0.817858	0.941512
L2-7_00870	L2-7_00870	-0.07829	0.076461	0.0409099	0.839712	0.949122
L2-7_00328	swrC	-0.0779012	7.37407	0.462631	0.496397	0.816738
L2-7_01772	L2-7_01772	-0.0778918	6.94695	0.178665	0.672523	0.896032
L2-7_00541	ribD	-0.0775862	11.4337	0.158657	0.690396	0.900209
L2-7_01029	scpA	-0.0775295	5.5397	0.150641	0.697924	0.902021
L2-7_00008	L2-7_00008	-0.0773282	8.81746	0.185974	0.666289	0.893736
L2-7_00503	mfd	-0.0772459	7.82643	0.236174	0.626983	0.876213
L2-7_01843	L2-7_01843	-0.0771939	3.18312	0.164054	0.685451	0.899594
L2-7_02341	L2-7_02341	-0.0771265	3.48702	0.110125	0.740002	0.916615
L2-7_02574	L2-7_02574	-0.0769419	1.37371	0.0665058	0.796494	0.931355
L2-7_01521	L2-7_01521	-0.0769342	2.90977	0.0779645	0.780075	0.925006
L2-7_01426	L2-7_01426	-0.0763745	7.16277	0.340167	0.559733	0.85326
L2-7_02862	deoC	-0.0763025	2.34002	0.124281	0.724437	0.913535
L2-7_01840	L2-7_01840	-0.075722	3.91646	0.254549	0.61389	0.868178
L2-7_01424	L2-7_01424	-0.0753744	2.34088	0.048119	0.826369	0.94492
L2-7_02271	L2-7_02271	-0.0751773	7.83528	0.329709	0.565831	0.85525
L2-7_01946	corA	-0.075152	7.62209	0.127172	0.721382	0.912638
L2-7_00380	rnfE	-0.0747431	7.86891	0.18102	0.670498	0.895123
L2-7_01028	scpB	-0.0747302	5.98926	0.139348	0.70893	0.907042
L2-7_01569	L2-7_01569	-0.0744337	2.78131	0.112914	0.736851	0.916615
L2-7_00344	eutL_2	-0.074244	6.36561	0.28313	0.594657	0.863397
L2-7_01115	rlmN	-0.0739231	7.7565	0.272544	0.60163	0.866442
L2-7_01106	L2-7_01106	-0.073868	5.88606	0.299757	0.584035	0.860717
L2-7_00630	spmA	-0.0736071	5.0653	0.341048	0.559225	0.85326
L2-7_01554	ytrA_1	-0.0734289	5.26969	0.301921	0.58268	0.8593
L2-7_02046	yhhX_1	-0.072641	4.90759	0.170591	0.679587	0.898905
L2-7_02753	yajL	-0.0722335	5.39327	0.239768	0.624374	0.874564
L2-7_01845	L2-7_01845	-0.0719509	4.69936	0.222771	0.636936	0.883729
L2-7_02481	birA	-0.0718751	6.65078	0.252843	0.615081	0.868178
L2-7_02367	soj_5	-0.0714354	0.530292	0.0565099	0.8121	0.937957
L2-7_01863	apeA	-0.0711915	8.02953	0.254923	0.61363	0.868178
L2-7_02109	L2-7_02109	-0.0707556	2.70013	0.101761	0.749726	0.916615
L2-7_01690	hom_2	-0.0707514	8.17051	0.0895527	0.764747	0.922059
L2-7_00456	L2-7_00456	-0.0706636	6.15119	0.129914	0.718522	0.911229
L2-7_02083	alaS_2	-0.070462	8.38337	0.186493	0.665852	0.893736
L2-7_02320	mdeA_4	-0.0702824	5.8326	0.0990433	0.752981	0.916615
L2-7_00040	mreC	-0.0702613	8.51051	0.173174	0.677307	0.897589
L2-7_03043	L2-7_03043	-0.0699124	2.35045	0.0505605	0.822091	0.942813
L2-7_02252	vanW	-0.069591	7.74357	0.255113	0.613498	0.868178
L2-7_00114	L2-7_00114	-0.0694911	6.3738	0.118192	0.731004	0.916615
L2-7_00888	L2-7_00888	-0.0694443	1.92642	0.113315	0.736401	0.916615
L2-7_01842	L2-7_01842	-0.069392	2.53556	0.114115	0.735507	0.916615
L2-7_02789	gcdC	-0.0692988	8.1454	0.0967348	0.755784	0.918925
L2-7_02601	L2-7_02601	-0.0687403	6.13507	0.112448	0.737374	0.916615
L2-7_01486	sdhB	-0.0678811	4.88151	0.287422	0.591877	0.862635
L2-7_01044	kdhA	-0.0677815	6.84717	0.200971	0.653938	0.891783
L2-7_01696	tqsA	-0.0677806	4.82894	0.142174	0.70613	0.907042
L2-7_02760	L2-7_02760	-0.067714	6.45774	0.169637	0.680435	0.898905
L2-7_02447	L2-7_02447	-0.0674364	3.52179	0.09133	0.762493	0.921702
L2-7_01571	L2-7_01571	-0.0666879	3.85375	0.0860231	0.769295	0.923062
L2-7_02248	trmL	-0.0665305	6.53015	0.217217	0.641169	0.886216
L2-7_00957	uvrC	-0.0665148	7.41975	0.211524	0.645576	0.886283
L2-7_01114	rsmB	-0.0663791	8.29556	0.197257	0.656944	0.89269
L2-7_02730	L2-7_02730	-0.06612	6.70394	0.102371	0.749002	0.916615
L2-7_00723	yxlF_1	-0.0660666	4.92352	0.143509	0.704817	0.907042
L2-7_02434	ttcA_2	-0.0658951	4.77097	0.216756	0.641523	0.886216
L2-7_00038	pbpA_1	-0.0658015	8.92192	0.192512	0.660834	0.893736
L2-7_02396	tagG	-0.0654596	6.12718	0.132994	0.715347	0.90944
L2-7_02565	L2-7_02565	-0.0654237	6.60129	0.165763	0.683906	0.898913
L2-7_00671	topB_1	-0.0653802	6.33942	0.156831	0.692091	0.900209
L2-7_01969	L2-7_01969	-0.0652737	5.26745	0.142283	0.706021	0.907042
L2-7_01347	L2-7_01347	-0.065155	7.42378	0.0394504	0.842559	0.951189
L2-7_00379	rnfG	-0.0651462	7.83364	0.117637	0.731611	0.916615
L2-7_02376	skfE	-0.0647696	5.66162	0.0508732	0.821551	0.942664
L2-7_02820	L2-7_02820	-0.064479	4.40918	0.162924	0.686478	0.899651
L2-7_02426	L2-7_02426	-0.0644573	2.11119	0.0563008	0.812441	0.937957
L2-7_01570	L2-7_01570	-0.0643743	4.2519	0.182729	0.669038	0.895123
L2-7_00627	L2-7_00627	-0.0642674	3.20003	0.127111	0.721446	0.912638
L2-7_03009	L2-7_03009	-0.0639562	4.09477	0.138174	0.710104	0.907362
L2-7_01409	L2-7_01409	-0.0639312	0.274457	0.0250548	0.874231	0.96717
L2-7_01854	L2-7_01854	-0.0638127	1.66136	0.0278277	0.867515	0.964574
L2-7_00331	L2-7_00331	-0.0636832	6.16432	0.0182957	0.892405	0.969006
L2-7_01913	ptsN	-0.0636061	3.92618	0.100845	0.750818	0.916615
L2-7_00517	L2-7_00517	-0.0635991	3.52026	0.159103	0.689984	0.900209
L2-7_02972	nanE	-0.0633871	4.22809	0.0726591	0.787504	0.927526
L2-7_02638	L2-7_02638	-0.0631809	7.06862	0.200868	0.654021	0.891783
L2-7_01241	epsH_2	-0.0628595	4.2886	0.0790475	0.778592	0.924487
L2-7_01733	bacD	-0.0628594	8.61679	0.134453	0.713859	0.908371
L2-7_02321	cysK_2	-0.0628456	5.97962	0.0844515	0.771353	0.923062
L2-7_01846	L2-7_01846	-0.0608906	1.73777	0.0604057	0.805856	0.934993
L2-7_00564	dagK	-0.0608532	6.86565	0.188416	0.664238	0.893736
L2-7_01006	L2-7_01006	-0.0608058	5.22633	0.0301299	0.862196	0.961587
L2-7_02048	glcR	-0.0599068	1.96597	0.0443917	0.833126	0.946392
L2-7_00198	L2-7_00198	-0.0595852	3.48887	0.155214	0.693601	0.900209
L2-7_00424	dpiB	-0.0595002	5.15671	0.112467	0.737353	0.916615
L2-7_01479	cysK_1	-0.0591146	2.56645	0.0226633	0.880336	0.96717
L2-7_00487	tagB_1	-0.0590591	7.55032	0.159269	0.68983	0.900209
L2-7_00024	rluD_1	-0.0588641	6.50824	0.157056	0.691882	0.900209
L2-7_02222	L2-7_02222	-0.0588636	4.98018	0.0583257	0.809162	0.935968
L2-7_01229	gluP	-0.0587999	3.95562	0.161541	0.687742	0.899651
L2-7_02616	L2-7_02616	-0.0587951	8.22051	0.158907	0.690165	0.900209
L2-7_01965	L2-7_01965	-0.0587133	6.73308	0.151196	0.697395	0.902011
L2-7_02671	amiC	-0.0586618	5.03164	0.140612	0.707673	0.907042
L2-7_01804	L2-7_01804	-0.0586324	3.29721	0.0454901	0.831105	0.946392
L2-7_01141	msbA	-0.0585536	6.24674	0.209228	0.647374	0.887446
L2-7_01354	glmM	-0.0581449	8.83684	0.173567	0.676961	0.897589
L2-7_00960	rpe	-0.0579668	7.73731	0.23641	0.626811	0.876213
L2-7_01371	L2-7_01371	-0.0578352	7.34016	0.125841	0.722784	0.913535
L2-7_02504	pduV_4	-0.0577511	6.91075	0.10613	0.744593	0.916615
L2-7_02935	L2-7_02935	-0.0575974	5.90832	0.194029	0.659584	0.89326
L2-7_02817	yegE	-0.0575254	6.22935	0.147034	0.701386	0.903994
L2-7_01088	L2-7_01088	-0.0571232	8.20902	0.116034	0.733377	0.916615
L2-7_02677	gpsA_2	-0.0567487	1.3863	0.0357075	0.850121	0.956245
L2-7_00770	L2-7_00770	-0.056736	5.99905	0.129887	0.718549	0.911229
L2-7_01373	ybeY	-0.0566375	5.22557	0.10269	0.748625	0.916615
L2-7_00518	L2-7_00518	-0.0565016	2.84535	0.0818352	0.774826	0.923463
L2-7_00479	L2-7_00479	-0.0558671	6.83491	0.0511186	0.821128	0.942664
L2-7_00342	L2-7_00342	-0.055831	4.93687	0.138125	0.710152	0.907362
L2-7_00115	sigA_2	-0.0556672	6.73099	0.0811667	0.775723	0.923724
L2-7_00166	gph_1	-0.0556021	5.05908	0.18008	0.671305	0.895123
L2-7_01055	desVI	-0.0552913	4.41936	0.0927878	0.760663	0.920283
L2-7_00451	dinB_3	-0.0547304	3.80826	0.0561044	0.812762	0.937957
L2-7_00944	glgB_2	-0.0543713	7.92888	0.148017	0.700438	0.903188
L2-7_02438	sir	-0.0543184	6.95956	0.151162	0.697427	0.902011
L2-7_01599	L2-7_01599	-0.0541357	3.62077	0.0638375	0.80053	0.933064
L2-7_02551	bssA	-0.0540165	3.21082	0.0809792	0.775975	0.923724
L2-7_02720	rpfC_4	-0.0538494	6.1112	0.106742	0.743884	0.916615
L2-7_01133	ydfG	-0.0537481	4.56457	0.106671	0.743967	0.916615
L2-7_01197	L2-7_01197	-0.0533874	5.21779	0.00739369	0.931477	0.983829
L2-7_02273	L2-7_02273	-0.0533186	4.61764	0.0890483	0.765391	0.922059
L2-7_00313	L2-7_00313	-0.053145	5.99129	0.0894553	0.764871	0.922059
L2-7_00171	L2-7_00171	-0.0531037	2.41255	0.0231869	0.878972	0.96717
L2-7_02385	walK	-0.0522041	7.28822	0.0705175	0.790585	0.928813
L2-7_01314	rpoE	-0.052167	1.20838	0.030508	0.861343	0.961164
L2-7_00039	L2-7_00039	-0.0518351	5.56464	0.100948	0.750695	0.916615
L2-7_02617	pleC_1	-0.0515295	8.21973	0.107931	0.742512	0.916615
L2-7_02402	mraY	-0.0514168	6.46483	0.0809352	0.776034	0.923724
L2-7_00232	frc	-0.0510536	0.503299	0.0182699	0.89248	0.969006
L2-7_01010	L2-7_01010	-0.0509034	6.38469	0.135492	0.712805	0.908074
L2-7_01306	rlmK	-0.0505777	7.10013	0.132304	0.716055	0.909514
L2-7_01453	gltC	-0.0504656	7.03743	0.157565	0.691408	0.900209
L2-7_01743	L2-7_01743	-0.0503523	5.0387	0.155183	0.69363	0.900209
L2-7_02245	nfo	-0.0502461	2.98393	0.0690183	0.792772	0.930602
L2-7_01945	L2-7_01945	-0.0502324	6.32582	0.0819205	0.774712	0.923463
L2-7_02836	L2-7_02836	-0.0498415	5.59105	0.0859723	0.769361	0.923062
L2-7_02507	cymR_2	-0.0496703	7.48745	0.165336	0.684291	0.898913
L2-7_00235	acrA_1	-0.0494872	1.604	0.0432753	0.835208	0.946392
L2-7_01574	L2-7_01574	-0.0494002	5.18774	0.104413	0.746597	0.916615
L2-7_00381	rnfA	-0.0492764	6.57652	0.101278	0.750301	0.916615
L2-7_02733	cgkA_7	-0.0492575	9.30773	0.0848833	0.770786	0.923062
L2-7_01531	L2-7_01531	-0.0490852	5.59805	0.0838447	0.772153	0.923062
L2-7_01037	ppk_2	-0.0489766	5.71542	0.110759	0.739282	0.916615
L2-7_01148	tlyA	-0.0484978	6.92866	0.150987	0.697594	0.902011
L2-7_01659	L2-7_01659	-0.048307	3.34811	0.00665553	0.93498	0.985313
L2-7_00833	rlmH_1	-0.0478324	4.96696	0.138183	0.710094	0.907362
L2-7_02241	alsT_3	-0.0478246	7.90036	0.124642	0.724053	0.913535
L2-7_00165	sigK	-0.047715	5.98994	0.119482	0.729597	0.916615
L2-7_00432	L2-7_00432	-0.0473958	0.0160529	0.015821	0.899905	0.969006
L2-7_02433	L2-7_02433	-0.047098	1.62464	0.0422517	0.837141	0.947745
L2-7_02442	pta_2	-0.0466183	9.6425	0.0464627	0.829337	0.946173
L2-7_00512	pbpD	-0.0463164	7.77073	0.10785	0.742605	0.916615
L2-7_00007	purE_1	-0.0459306	8.33904	0.0652558	0.798374	0.932259
L2-7_02825	L2-7_02825	-0.0458501	3.51647	0.025051	0.87424	0.96717
L2-7_01098	yjbM	-0.0457944	7.2713	0.0717768	0.788767	0.928085
L2-7_01149	dxs_1	-0.0454726	8.16622	0.0934242	0.759868	0.91972
L2-7_02429	gltS	-0.0453197	5.61077	0.102793	0.748503	0.916615
L2-7_01950	moaC	-0.0452084	3.41122	0.052039	0.819553	0.9423
L2-7_00202	L2-7_00202	-0.0450582	6.02403	0.0314645	0.859208	0.960312
L2-7_02742	L2-7_02742	-0.044778	2.36932	0.0599727	0.806539	0.935192
L2-7_00319	L2-7_00319	-0.0447371	4.86107	0.0993544	0.752606	0.916615
L2-7_00983	L2-7_00983	-0.0444111	6.75472	0.0591285	0.807879	0.935192
L2-7_02124	L2-7_02124	-0.0444004	4.35691	0.0369081	0.847652	0.955015
L2-7_02761	L2-7_02761	-0.0443293	6.77796	0.0865283	0.768638	0.923062
L2-7_00628	L2-7_00628	-0.0441396	5.88015	0.10429	0.746741	0.916615
L2-7_01222	L2-7_01222	-0.0440816	3.99363	0.0664685	0.79655	0.931355
L2-7_01249	L2-7_01249	-0.043636	5.64207	0.101251	0.750334	0.916615
L2-7_02395	lgt	-0.0435725	5.69903	0.0885107	0.766079	0.922059
L2-7_00967	modB	-0.0434162	3.30597	0.0627234	0.802242	0.933506
L2-7_01929	panF	-0.0431371	6.65495	0.0964605	0.756119	0.918925
L2-7_02416	cph2_2	-0.0430956	6.84158	0.0217222	0.882828	0.96717
L2-7_00138	metK_1	-0.0430594	6.15814	0.0682793	0.793859	0.930708
L2-7_00633	L2-7_00633	-0.0430231	3.15701	0.0629526	0.801889	0.933506
L2-7_01530	L2-7_01530	-0.0428232	6.32663	0.055171	0.814298	0.93857
L2-7_01116	stp_1	-0.0425943	6.97535	0.110355	0.739741	0.916615
L2-7_00286	L2-7_00286	-0.0423348	3.82826	0.0797583	0.777625	0.924117
L2-7_02807	L2-7_02807	-0.0422555	5.49655	0.0509067	0.821493	0.942664
L2-7_02743	L2-7_02743	-0.0421682	3.21101	0.0383293	0.844783	0.952932
L2-7_00005	purN	-0.0417933	8.85406	0.055391	0.813935	0.938537
L2-7_00705	phnX	-0.0416912	1.32291	0.0359391	0.849641	0.956245
L2-7_02234	L2-7_02234	-0.0416434	0.909082	0.0194858	0.888983	0.967727
L2-7_02619	L2-7_02619	-0.0413161	7.13905	0.0622343	0.802999	0.933999
L2-7_02832	L2-7_02832	-0.040319	4.51911	0.0643947	0.79968	0.932539
L2-7_00744	L2-7_00744	-0.0395705	3.29033	0.0233828	0.878466	0.96717
L2-7_01902	L2-7_01902	-0.0389436	8.35338	0.0581974	0.809368	0.935968
L2-7_00691	cysA_1	-0.0386914	5.92301	0.0620163	0.803337	0.934004
L2-7_00266	tetO_1	-0.0385642	4.85191	0.0160339	0.899237	0.969006
L2-7_01710	L2-7_01710	-0.0385456	6.12258	0.0330331	0.855779	0.95909
L2-7_01932	ssrA	-0.0381541	13.7969	0.0146495	0.903663	0.970759
L2-7_02891	L2-7_02891	-0.0378056	5.81491	0.00488439	0.944282	0.98546
L2-7_02088	L2-7_02088	-0.0376692	4.76021	0.00961209	0.9219	0.9807
L2-7_02240	L2-7_02240	-0.0375588	1.61172	0.0243715	0.875943	0.96717
L2-7_01464	L2-7_01464	-0.0371424	1.77732	0.00748655	0.931049	0.983829
L2-7_00674	L2-7_00674	-0.0371394	6.00187	0.0859154	0.769436	0.923062
L2-7_01837	trpS2	-0.0369759	8.59625	0.0162699	0.898502	0.969006
L2-7_01967	L2-7_01967	-0.0355447	4.38551	0.0394842	0.842492	0.951189
L2-7_00799	cobB_1	-0.0354108	6.69614	0.0438756	0.834085	0.946392
L2-7_02337	L2-7_02337	-0.0353801	5.34513	0.0721593	0.788218	0.927978
L2-7_02403	murD	-0.0351212	7.1959	0.0527799	0.818295	0.941627
L2-7_01645	L2-7_01645	-0.0347015	-0.0100977	0.00759769	0.930541	0.983829
L2-7_02737	L2-7_02737	-0.0346494	5.32073	0.0283338	0.866326	0.964255
L2-7_02572	L2-7_02572	-0.0343229	9.15052	0.0288375	0.865155	0.963882
L2-7_00396	ybhF_1	-0.0338615	3.44938	0.0357514	0.85003	0.956245
L2-7_01609	yccM_2	-0.0337704	2.95431	0.013261	0.908321	0.972267
L2-7_02110	L2-7_02110	-0.032614	3.68449	0.0148104	0.903138	0.970692
L2-7_01672	ywpJ_2	-0.0326076	4.44532	0.0209119	0.885019	0.96717
L2-7_02223	L2-7_02223	-0.0325813	4.87342	0.0373383	0.846778	0.954797
L2-7_02027	L2-7_02027	-0.0321569	5.02206	0.0455389	0.831016	0.946392
L2-7_02251	L2-7_02251	-0.0320405	5.99144	0.0571833	0.811005	0.937086
L2-7_02893	L2-7_02893	-0.0315305	4.99721	0.00256256	0.959627	0.987011
L2-7_02073	copZ	-0.0313129	2.11305	0.0153049	0.901542	0.969348
L2-7_00917	L2-7_00917	-0.0312351	6.77479	0.0307228	0.86086	0.961008
L2-7_01803	L2-7_01803	-0.0310657	3.2267	0.0114308	0.914856	0.976544
L2-7_00006	purM	-0.0306516	9.46461	0.0223058	0.881277	0.96717
L2-7_00610	L2-7_00610	-0.0306447	2.16649	0.00749024	0.931032	0.983829
L2-7_01624	L2-7_01624	-0.0305695	8.1556	0.0483812	0.825904	0.94492
L2-7_00872	ssb_2	-0.0301771	1.53429	0.0200394	0.887427	0.967488
L2-7_00018	uppP	-0.0301725	6.07688	0.0457213	0.830683	0.946392
L2-7_02955	aroC	-0.0298107	6.7134	0.0504087	0.822354	0.942813
L2-7_02906	L2-7_02906	-0.0293911	1.75308	0.0196871	0.888415	0.967488
L2-7_02264	L2-7_02264	-0.0292616	5.93331	0.0349109	0.851782	0.957175
L2-7_00371	purF	-0.0290433	9.17989	0.0275885	0.86808	0.964574
L2-7_00794	L2-7_00794	-0.0281974	7.6943	0.0222378	0.881456	0.96717
L2-7_02387	metA	-0.0271696	8.36225	0.0322411	0.8575	0.959256
L2-7_01899	wcaJ	-0.0265431	7.30314	0.0439996	0.833854	0.946392
L2-7_02377	L2-7_02377	-0.0264437	6.89885	0.0185264	0.891733	0.969006
L2-7_02045	L2-7_02045	-0.0264254	4.46366	0.0214435	0.883577	0.96717
L2-7_02032	ruvA	-0.0252112	5.0547	0.0158126	0.899931	0.969006
L2-7_01303	atpB_2	-0.0243498	5.68429	0.010435	0.918636	0.978714
L2-7_01944	L2-7_01944	-0.0243473	5.91629	0.0212076	0.884215	0.96717
L2-7_02808	L2-7_02808	-0.0243132	6.69779	0.044565	0.832806	0.946392
L2-7_00724	yxlG	-0.0241398	4.51584	0.0177195	0.894103	0.969006
L2-7_01296	atpC_2	-0.0239564	5.83381	0.00665414	0.934986	0.985313
L2-7_01480	L2-7_01480	-0.0234894	3.56185	0.00969698	0.921557	0.9807
L2-7_01958	L2-7_01958	-0.0233491	5.17496	0.0235194	0.878114	0.96717
L2-7_03041	L2-7_03041	-0.0226484	4.74043	0.00940914	0.922726	0.980834
L2-7_01461	ttdB	-0.0222572	1.95267	0.00618204	0.93733	0.985313
L2-7_00948	degU_2	-0.0220777	2.98499	0.0126587	0.910418	0.973661
L2-7_01352	L2-7_01352	-0.0218714	8.67637	0.0176665	0.89426	0.969006
L2-7_02905	L2-7_02905	-0.0217734	2.06872	0.0084117	0.926924	0.983453
L2-7_02431	L2-7_02431	-0.0216941	5.38764	0.0174281	0.894972	0.969006
L2-7_01593	L2-7_01593	-0.0215612	3.14521	0.0157528	0.90012	0.969006
L2-7_01073	L2-7_01073	-0.0215288	3.83844	0.013926	0.906061	0.971597
L2-7_00695	rlmL	-0.0214356	7.35724	0.0238937	0.877156	0.96717
L2-7_02275	parB_1	-0.0213544	5.86485	0.0121682	0.912164	0.975156
L2-7_02511	glpF_2	-0.0211088	12.6742	0.00533957	0.941749	0.98546
L2-7_02418	alsB	-0.020925	6.78802	0.0097524	0.921333	0.9807
L2-7_02948	degA_3	-0.0203627	2.36277	0.00738605	0.931512	0.983829
L2-7_01532	dacA	-0.0203613	7.02398	0.0166747	0.897254	0.969006
L2-7_00425	L2-7_00425	-0.0201559	0.126629	0.00369991	0.951497	0.98546
L2-7_01018	tagB_2	-0.0200712	5.5341	0.00806904	0.928424	0.983829
L2-7_00142	cooS	-0.0200061	3.34535	0.0105243	0.91829	0.978714
L2-7_02687	puuR_1	-0.0199915	4.01549	0.00570176	0.939809	0.98546
L2-7_00307	aplIR	-0.0199103	6.44504	0.02411	0.876605	0.96717
L2-7_02858	L2-7_02858	-0.019741	5.32064	0.0204836	0.886195	0.967488
L2-7_02793	L2-7_02793	-0.0191908	1.96728	0.00338435	0.953609	0.98546
L2-7_01054	hslO	-0.019174	5.58431	0.0217875	0.882654	0.96717
L2-7_00785	recQ	-0.0189766	5.75901	0.0161473	0.898883	0.969006
L2-7_02000	ecfT_3	-0.0189736	3.43086	0.00665379	0.934988	0.985313
L2-7_00696	L2-7_00696	-0.0185728	6.15359	0.0134303	0.90774	0.972267
L2-7_02837	L2-7_02837	-0.0179829	5.02076	0.0134564	0.907651	0.972267
L2-7_01324	L2-7_01324	-0.0179795	5.25774	0.00808467	0.928355	0.983829
L2-7_02469	L2-7_02469	-0.0175771	3.62031	0.00595844	0.938472	0.985313
L2-7_02959	pdg	-0.0172746	5.47442	0.0065568	0.935463	0.985313
L2-7_00108	L2-7_00108	-0.0171865	5.49189	0.00602502	0.93813	0.985313
L2-7_02480	argF	-0.0168547	7.4151	0.0143455	0.904663	0.971213
L2-7_00128	L2-7_00128	-0.0159664	1.89689	0.00527476	0.942102	0.98546
L2-7_01850	L2-7_01850	-0.0157708	1.61122	0.00382524	0.950683	0.98546
L2-7_00910	L2-7_00910	-0.0156828	0.277287	0.00220552	0.962543	0.987292
L2-7_00958	ftsH_1	-0.0155119	9.07386	0.00840704	0.926944	0.983453
L2-7_02322	adhR	-0.0152755	2.79492	0.00430953	0.947659	0.98546
L2-7_01104	recU	-0.0145998	5.13875	0.0140976	0.905487	0.971353
L2-7_01970	L2-7_01970	-0.014564	7.17213	0.00721247	0.93232	0.984311
L2-7_02600	L2-7_02600	-0.0145313	5.94701	0.00517549	0.942649	0.98546
L2-7_01092	sugC_2	-0.0143111	6.47823	0.00373064	0.951296	0.98546
L2-7_02684	ydcV_3	-0.0141962	4.96835	0.00449782	0.946529	0.98546
L2-7_02310	gltP	-0.0133495	4.94278	0.00449734	0.946532	0.98546
L2-7_02360	ssbB	-0.0131898	0.802428	0.000383695	0.984372	0.99395
L2-7_01844	L2-7_01844	-0.0127187	6.03804	0.0077211	0.92998	0.983829
L2-7_00222	serA	-0.0126077	8.96838	0.00346835	0.953038	0.98546
L2-7_02995	L2-7_02995	-0.0120043	3.45605	0.00773476	0.929918	0.983829
L2-7_02934	L2-7_02934	-0.0116271	6.11868	0.00894166	0.924664	0.982149
L2-7_02796	L2-7_02796	-0.0115563	4.01575	0.00424423	0.948056	0.98546
L2-7_00206	L2-7_00206	-0.0113277	3.68007	0.00250716	0.960065	0.987011
L2-7_02182	nrnA_2	-0.0111081	9.13927	0.00405648	0.949217	0.98546
L2-7_00849	hisK_2	-0.0109711	5.66548	0.00453231	0.946325	0.98546
L2-7_01004	L2-7_01004	-0.0106959	5.18551	0.000610444	0.980289	0.992223
L2-7_02751	cobU	-0.0105282	6.13257	0.00636085	0.936432	0.985313
L2-7_02150	mtnK_1	-0.0105072	8.08219	0.00281005	0.957724	0.986234
L2-7_00665	L2-7_00665	-0.0104914	7.45964	0.00470976	0.945286	0.98546
L2-7_01096	apeB	-0.00984076	6.46299	0.00526464	0.942158	0.98546
L2-7_01934	sfp_2	-0.00976792	2.94012	0.00135365	0.970651	0.988255
L2-7_00963	dnaE	-0.00936448	7.53075	0.00568	0.939924	0.98546
L2-7_00433	angR	-0.00928962	0.183143	0.000691806	0.979016	0.992223
L2-7_01374	ybeZ	-0.00858222	7.08457	0.00373377	0.951276	0.98546
L2-7_01859	yycJ	-0.00852633	7.01251	0.00206977	0.963713	0.987292
L2-7_00032	dacF_1	-0.00822303	8.08565	0.00374524	0.951201	0.98546
L2-7_00265	L2-7_00265	-0.00815239	4.16841	0.00149695	0.969137	0.987463
L2-7_00830	gldA	-0.00813891	7.15287	0.00345038	0.953159	0.98546
L2-7_02806	mnmA	-0.00807929	7.11794	0.00305051	0.955954	0.986104
L2-7_00415	pucK_1	-0.00748638	9.05649	0.00166579	0.967444	0.987463
L2-7_00011	L2-7_00011	-0.00740949	5.55704	0.00335736	0.953794	0.98546
L2-7_00116	dnaG_1	-0.00733062	7.94618	0.00158585	0.968234	0.987463
L2-7_00667	purR	-0.00731527	5.84983	0.00289343	0.957102	0.986234
L2-7_02483	coaX	-0.00716886	7.04019	0.00205217	0.963867	0.987292
L2-7_02130	metH_2	-0.00681898	7.04775	0.00174015	0.966726	0.987292
L2-7_02690	hemZ	-0.00666229	8.69596	0.00132412	0.970973	0.988255
L2-7_00264	L2-7_00264	-0.00665645	7.14943	0.00286004	0.95735	0.986234
L2-7_01165	ftsY	-0.0066266	6.76719	0.00163503	0.967746	0.987463
L2-7_02484	dus_1	-0.00638519	7.31206	0.00150501	0.969054	0.987463
L2-7_02189	yhdG	-0.00614775	1.63806	0.00082037	0.97715	0.991301
L2-7_02727	L2-7_02727	-0.00580249	2.35614	0.000760258	0.978003	0.991807
L2-7_00629	gmr_1	-0.00571909	6.4408	0.00181264	0.96604	0.987292
L2-7_02010	recD2	-0.00547222	8.67575	0.00113678	0.973103	0.988987
L2-7_01167	rnc	-0.00546763	4.6674	0.000900574	0.976059	0.990554
L2-7_01001	L2-7_01001	-0.00530942	5.06576	0.000626992	0.980023	0.992223
L2-7_01297	atpD_2	-0.00413836	7.09098	0.000240069	0.987638	0.995096
L2-7_00151	Int-Tn_1	-0.00273301	8.95695	0.000327311	0.985566	0.9943
L2-7_01422	L2-7_01422	-0.00204885	6.79726	0.000223677	0.988067	0.995171
L2-7_01793	rarA	-0.0018229	5.33863	0.000124872	0.991084	0.996776
L2-7_02097	L2-7_02097	-0.00182286	2.33497	8.15e-05	0.992797	0.997476
L2-7_01032	thiC	-0.001595	3.65701	6.5e-05	0.993569	0.997842
L2-7_02184	plsC	-0.00153378	7.75256	0.000137021	0.99066	0.996708
L2-7_02561	L2-7_02561	-0.0014177	8.66004	8.03e-05	0.992848	0.997476
L2-7_02161	L2-7_02161	-0.00120203	1.91166	5.18e-06	0.998185	0.999503
L2-7_02724	luxQ_3	-0.000915289	6.45068	3.47e-05	0.995302	0.998867
L2-7_00540	ribE	-0.000726061	9.94902	1.76e-05	0.996657	0.999503
L2-7_00317	ntcA_2	-0.000580379	7.43951	3.42e-06	0.998525	0.999503
L2-7_00341	mepH	-0.000278103	9.2438	2.3e-06	0.99879	0.999503
L2-7_02121	L2-7_02121	-3.92e-05	7.45574	5.98e-08	0.999805	0.999805
L2-7_01111	priA	7.36e-05	7.65228	3.24e-07	0.999545	0.999805
L2-7_00644	L2-7_00644	0.000335175	6.66845	5.32e-06	0.99816	0.999503
L2-7_01113	fmt	0.000345073	7.6892	7.14e-06	0.997868	0.999503
L2-7_00395	L2-7_00395	0.000657016	2.53319	1.14e-05	0.997309	0.999503
L2-7_02508	L2-7_02508	0.000718333	5.81351	1.79e-05	0.996626	0.999503
L2-7_00645	L2-7_00645	0.00114297	6.45058	5.15e-05	0.994276	0.998195
L2-7_01775	plsY	0.00139804	6.75845	0.000107363	0.991733	0.99707
L2-7_02411	sstT	0.00183324	8.78695	0.00016787	0.989663	0.996061
L2-7_02266	L2-7_02266	0.00190968	6.30188	0.000182854	0.989211	0.995965
L2-7_00121	L2-7_00121	0.00253539	5.42587	0.000282949	0.986579	0.994387
L2-7_01771	rex	0.00284914	8.77623	0.000295798	0.986278	0.994387
L2-7_00448	L2-7_00448	0.00293925	3.20777	0.000338009	0.985332	0.9943
L2-7_02399	L2-7_02399	0.00300577	5.14244	0.000545357	0.981369	0.992706
L2-7_00488	L2-7_00488	0.00301974	8.311	0.00042778	0.983499	0.993784
L2-7_01105	L2-7_01105	0.00348225	7.56559	0.000611399	0.980273	0.992223
L2-7_00162	L2-7_00162	0.0039721	7.07338	0.00101843	0.974542	0.989372
L2-7_02657	ppdK	0.00417609	12.023	0.000400139	0.984041	0.99395
L2-7_00135	btr_1	0.00422747	3.75637	0.000439546	0.983273	0.993784
L2-7_01627	mepA_9	0.00458633	6.46422	0.0014441	0.969687	0.987663
L2-7_00377	rnfC_1	0.00609425	9.16283	0.00122875	0.972037	0.988371
L2-7_01816	argJ	0.00618357	6.60291	0.00121928	0.972145	0.988371
L2-7_00200	hsdR_1	0.00620391	7.0341	0.00244137	0.960592	0.987011
L2-7_00309	L2-7_00309	0.00620705	4.93085	0.00217802	0.962777	0.987292
L2-7_01848	L2-7_01848	0.00622294	1.83792	0.000504092	0.982087	0.993074
L2-7_02176	dapA	0.00640123	8.56822	0.00102271	0.974488	0.989372
L2-7_01695	mgtE	0.00662755	6.03646	0.00183778	0.965806	0.987292
L2-7_02375	ytrA_2	0.00685553	3.96636	0.000317489	0.985784	0.9943
L2-7_01594	dmdA_2	0.00697897	9.14314	0.000595105	0.980538	0.992223
L2-7_00152	cgkA_1	0.00698235	9.4576	0.00172785	0.966844	0.987292
L2-7_02553	gloA	0.00717586	6.91388	0.00224306	0.962226	0.987292
L2-7_01689	hcp_2	0.00736273	6.22878	0.00065025	0.979656	0.992223
L2-7_02829	L2-7_02829	0.00742834	3.8646	0.00195512	0.964732	0.987292
L2-7_00145	L2-7_00145	0.00765352	3.68846	0.00125317	0.971761	0.988371
L2-7_01613	rsfS	0.00775013	5.03472	0.00228522	0.961872	0.987292
L2-7_00199	L2-7_00199	0.00783574	4.12912	0.00301783	0.95619	0.986104
L2-7_01960	srrA_3	0.00788773	4.99133	0.00366041	0.951756	0.98546
L2-7_01861	polA	0.00813328	7.46489	0.00384187	0.950577	0.98546
L2-7_00791	cobS	0.00862871	6.85636	0.00244375	0.960573	0.987011
L2-7_02419	gmr_3	0.00871215	6.71074	0.00203358	0.964031	0.987292
L2-7_00242	allC	0.00874935	4.05845	0.00181278	0.966039	0.987292
L2-7_01951	L2-7_01951	0.00876099	4.80819	0.00253292	0.959861	0.987011
L2-7_01667	yehU_2	0.00908873	5.96404	0.00430889	0.947663	0.98546
L2-7_02913	hcpC	0.00953188	8.62472	0.00285093	0.957418	0.986234
L2-7_00635	L2-7_00635	0.00984819	4.94994	0.00172656	0.966856	0.987292
L2-7_00055	hisK_1	0.00994768	5.10535	0.00587636	0.938896	0.985313
L2-7_00314	mepA_3	0.0100434	7.54431	0.00369364	0.951538	0.98546
L2-7_00161	L2-7_00161	0.0102727	7.28563	0.00618711	0.937305	0.985313
L2-7_02800	L2-7_02800	0.0103055	4.12693	0.00507383	0.943214	0.98546
L2-7_00160	rnjA	0.010557	9.67896	0.00465477	0.945606	0.98546
L2-7_00465	L2-7_00465	0.0108217	1.35448	0.00173632	0.966762	0.987292
L2-7_00355	msrR	0.0109687	7.84244	0.00424113	0.948075	0.98546
L2-7_01175	L2-7_01175	0.0116962	5.09026	0.00250603	0.960074	0.987011
L2-7_02650	cas5_2	0.0117047	0.950788	0.00105074	0.974141	0.989372
L2-7_00939	L2-7_00939	0.0124579	10.2651	0.00309505	0.955634	0.986104
L2-7_00619	L2-7_00619	0.0127234	3.0708	0.00230845	0.961679	0.987292
L2-7_02122	L2-7_02122	0.0129174	4.38289	0.00488361	0.944287	0.98546
L2-7_01331	L2-7_01331	0.0131601	5.12817	0.00494449	0.943941	0.98546
L2-7_02276	soj_4	0.0137637	5.4537	0.00411954	0.948824	0.98546
L2-7_02569	L2-7_02569	0.0139649	5.61273	0.00450593	0.946481	0.98546
L2-7_02506	L2-7_02506	0.0140025	6.16554	0.00434148	0.947465	0.98546
L2-7_00795	cbiT	0.0140845	7.52651	0.00640542	0.93621	0.985313
L2-7_02207	cwlS_1	0.0145987	2.64214	0.00334142	0.953904	0.98546
L2-7_00437	cmoA	0.0148673	2.46007	0.00194562	0.964817	0.987292
L2-7_02013	L2-7_02013	0.0158627	9.50113	0.00624758	0.937	0.985313
L2-7_00916	cgkA_2	0.0159684	9.45281	0.00525276	0.942223	0.98546
L2-7_00970	lysA	0.0162746	6.22349	0.00494421	0.943943	0.98546
L2-7_01706	L2-7_01706	0.0163954	7.01655	0.0157976	0.899978	0.969006
L2-7_01704	engB	0.0166867	6.32109	0.0109401	0.916697	0.977392
L2-7_02249	patA_3	0.0168815	7.0592	0.0165974	0.897492	0.969006
L2-7_00201	L2-7_00201	0.0169171	5.84707	0.0165992	0.897486	0.969006
L2-7_02788	L2-7_02788	0.0169892	8.12566	0.00650098	0.935737	0.985313
L2-7_01103	rluC_2	0.0171504	6.8366	0.0185243	0.891739	0.969006
L2-7_00745	L2-7_00745	0.0172462	6.15873	0.0145792	0.903894	0.970759
L2-7_01953	alsT_2	0.0174997	9.44925	0.00151507	0.968951	0.987463
L2-7_02887	graR	0.0179539	3.98114	0.00962634	0.921842	0.9807
L2-7_01483	srpC_3	0.0188142	5.91267	0.00613401	0.937574	0.985313
L2-7_03042	L2-7_03042	0.0188968	3.74457	0.00645283	0.935975	0.985313
L2-7_00757	L2-7_00757	0.0190323	3.02156	0.0157318	0.900186	0.969006
L2-7_02699	L2-7_02699	0.0192123	4.23597	0.0156111	0.900568	0.969044
L2-7_00310	queC_1	0.0192594	5.78265	0.0118914	0.913164	0.975481
L2-7_00800	L2-7_00800	0.0200364	5.17791	0.0132321	0.908421	0.972267
L2-7_00041	mreB_1	0.0200976	8.82084	0.0117553	0.913661	0.97564
L2-7_01369	L2-7_01369	0.020509	6.93006	0.0198944	0.887832	0.967488
L2-7_00483	tuaA	0.0205487	3.98003	0.00751197	0.930933	0.983829
L2-7_02267	L2-7_02267	0.0206472	6.10722	0.0215065	0.883407	0.96717
L2-7_03013	L2-7_03013	0.0206836	6.50752	0.0189644	0.890468	0.968968
L2-7_00818	blaR1	0.0211473	7.31548	0.00458796	0.945997	0.98546
L2-7_00301	L2-7_00301	0.0219975	6.1257	0.00330185	0.954177	0.98546
L2-7_01047	recX	0.0223691	6.09528	0.0260163	0.871861	0.96717
L2-7_01005	aroA1	0.0224919	5.98652	0.00325395	0.954511	0.98546
L2-7_00489	mazG	0.0226536	6.35034	0.0230038	0.879447	0.96717
L2-7_02946	L2-7_02946	0.0226816	3.1778	0.0134782	0.907577	0.972267
L2-7_01664	mro	0.0227526	5.6657	0.0225523	0.880627	0.96717
L2-7_01818	argD_1	0.0227527	6.7846	0.0217204	0.882833	0.96717
L2-7_01380	L2-7_01380	0.0230226	6.63863	0.0225405	0.880658	0.96717
L2-7_00036	minD	0.0230315	7.11239	0.0338996	0.853921	0.957457
L2-7_02440	L2-7_02440	0.0231159	8.14662	0.0196859	0.888418	0.967488
L2-7_02899	L2-7_02899	0.0235359	3.2423	0.0086955	0.925705	0.982882
L2-7_01561	topB_2	0.0236805	4.67531	0.0186284	0.891437	0.969006
L2-7_00969	L2-7_00969	0.0236953	4.21293	0.0248101	0.874841	0.96717
L2-7_02527	murR_2	0.023888	4.44709	0.0159456	0.899514	0.969006
L2-7_01708	L2-7_01708	0.0239934	7.4454	0.00811865	0.928205	0.983829
L2-7_00831	flr_1	0.0242237	4.91365	0.0212562	0.884083	0.96717
L2-7_01762	niaR	0.0244632	5.18822	0.0355486	0.850451	0.956245
L2-7_01565	L2-7_01565	0.0248047	0.350255	0.00589083	0.938821	0.985313
L2-7_02014	L2-7_02014	0.024955	11.0768	0.0162882	0.898446	0.969006
L2-7_02466	L2-7_02466	0.0251083	3.87948	0.0238593	0.877243	0.96717
L2-7_01497	L2-7_01497	0.025446	5.38847	0.0309591	0.860332	0.960801
L2-7_00775	proX	0.025956	5.326	0.0415982	0.838388	0.94839
L2-7_00044	miaA	0.0259803	4.89994	0.0206637	0.885699	0.967488
L2-7_02629	cas2_2	0.0260816	0.348303	0.00385333	0.950503	0.98546
L2-7_00959	L2-7_00959	0.0260992	7.81818	0.0320985	0.857812	0.959256
L2-7_03046	L2-7_03046	0.0264	4.91101	0.00919642	0.923602	0.981392
L2-7_02388	ligA	0.0264725	8.86579	0.0227291	0.880164	0.96717
L2-7_02373	guaA	0.0265761	10.4733	0.0234174	0.878377	0.96717
L2-7_00419	L2-7_00419	0.0267473	3.52767	0.0154428	0.901102	0.969247
L2-7_02925	L2-7_02925	0.0269319	5.21902	0.011921	0.913057	0.975481
L2-7_02467	L2-7_02467	0.027732	4.95948	0.0369153	0.847638	0.955015
L2-7_02034	zapA	0.0281725	4.4754	0.0217662	0.882711	0.96717
L2-7_02327	L2-7_02327	0.028626	8.91592	0.030036	0.862409	0.961587
L2-7_01494	L2-7_01494	0.0286757	8.43963	0.0345843	0.852469	0.957175
L2-7_02886	cysL	0.0287093	4.27239	0.0412414	0.839073	0.948782
L2-7_02729	tee6	0.0287994	4.69509	0.0227831	0.880022	0.96717
L2-7_00212	sleB	0.0288066	0.0707686	0.00333571	0.953943	0.98546
L2-7_02386	yycF_2	0.0289419	6.96738	0.0264489	0.870809	0.966722
L2-7_02748	putP_2	0.0294855	8.98797	0.026694	0.870217	0.966448
L2-7_02513	queA	0.0297574	8.95164	0.0235491	0.878038	0.96717
L2-7_02998	L2-7_02998	0.030018	2.70602	0.0228463	0.879857	0.96717
L2-7_00477	L2-7_00477	0.0301561	4.46086	0.048016	0.826552	0.94492
L2-7_02738	L2-7_02738	0.0304359	3.12698	0.0246763	0.875176	0.96717
L2-7_01937	iphP	0.0313024	4.96997	0.0199252	0.887746	0.967488
L2-7_00838	lrpC	0.0316774	2.58097	0.0178748	0.893642	0.969006
L2-7_00033	mgsA	0.0318613	6.47611	0.0759312	0.782889	0.925829
L2-7_00747	L2-7_00747	0.0320872	4.82627	0.0476158	0.827265	0.945286
L2-7_02406	ftsZ	0.0328918	9.97385	0.0440969	0.833673	0.946392
L2-7_02747	L2-7_02747	0.0329893	2.18731	0.0169194	0.896507	0.969006
L2-7_02336	L2-7_02336	0.0332616	4.71896	0.0496244	0.823718	0.943669
L2-7_01562	glmU_2	0.0336031	6.08772	0.051599	0.820304	0.942611
L2-7_02038	ndx1	0.0337169	6.36494	0.0651663	0.798509	0.932259
L2-7_01417	L2-7_01417	0.0340154	4.06052	0.0328983	0.85607	0.95909
L2-7_00158	yrrK	0.0344022	7.34623	0.0673639	0.795214	0.931355
L2-7_00662	L2-7_00662	0.0345853	7.79824	0.0339483	0.853817	0.957457
L2-7_02757	glmS	0.0351193	9.97609	0.0441532	0.833569	0.946392
L2-7_00177	L2-7_00177	0.0351371	4.75485	0.0690687	0.792698	0.930602
L2-7_00279	L2-7_00279	0.0358387	0.0817021	0.0094873	0.922407	0.980834
L2-7_01298	atpG_2	0.0360814	5.8815	0.0160762	0.899105	0.969006
L2-7_03038	L2-7_03038	0.0361609	3.72071	0.0165427	0.897659	0.969006
L2-7_01217	ispE	0.0366042	7.38882	0.0430621	0.835608	0.946392
L2-7_01684	L2-7_01684	0.0367791	5.42147	0.0403357	0.840826	0.949997
L2-7_02975	rpfC_6	0.0368143	6.16569	0.090031	0.764138	0.922059
L2-7_02424	L2-7_02424	0.0368348	7.64422	0.0798915	0.777444	0.924117
L2-7_02954	rsmE	0.0370591	6.70131	0.0736325	0.786119	0.927455
L2-7_02691	L2-7_02691	0.0371986	7.6272	0.0440321	0.833794	0.946392
L2-7_02381	thrC	0.0374058	7.91079	0.0282502	0.866522	0.964255
L2-7_02879	L2-7_02879	0.0375226	1.88486	0.0197821	0.888147	0.967488
L2-7_01299	atpA_2	0.0381419	6.95528	0.0247335	0.875033	0.96717
L2-7_01974	L2-7_01974	0.038157	6.0461	0.0109603	0.916621	0.977392
L2-7_02412	ydeH	0.0382691	5.5189	0.0839874	0.771965	0.923062
L2-7_02244	L2-7_02244	0.0382749	3.85875	0.0312721	0.859635	0.960405
L2-7_02547	spoVAD	0.0382893	1.88959	0.0251997	0.87387	0.96717
L2-7_01411	hisJ	0.0383038	5.14126	0.0454381	0.831201	0.946392
L2-7_02739	L2-7_02739	0.0384355	6.08582	0.0944506	0.758594	0.919368
L2-7_02840	L2-7_02840	0.0387931	8.07887	0.0779593	0.780082	0.925006
L2-7_01321	L2-7_01321	0.0388548	4.96418	0.0201269	0.887183	0.967488
L2-7_01485	sdhA	0.0389822	7.22268	0.0885928	0.765974	0.922059
L2-7_00263	L2-7_00263	0.0390254	6.72876	0.0780916	0.7799	0.925006
L2-7_00553	toxA_1	0.0391984	4.11021	0.0241529	0.876497	0.96717
L2-7_02787	L2-7_02787	0.0392282	10.3604	0.0344518	0.852749	0.957175
L2-7_01308	L2-7_01308	0.0394494	5.45904	0.020965	0.884874	0.96717
L2-7_00358	L2-7_00358	0.0398462	8.02477	0.0999545	0.751884	0.916615
L2-7_00828	cph2_1	0.0402329	7.57755	0.080199	0.777028	0.924117
L2-7_00950	rbsB	0.0402464	2.18983	0.0225352	0.880672	0.96717
L2-7_02305	csoR_2	0.0403552	1.00173	0.0209898	0.884807	0.96717
L2-7_02721	L2-7_02721	0.0405097	5.88481	0.0298177	0.862904	0.961757
L2-7_02580	L2-7_02580	0.041372	6.69599	0.0858146	0.769567	0.923062
L2-7_01817	argB	0.0416909	6.07803	0.0466081	0.829074	0.946173
L2-7_01164	tdcB	0.0417351	7.47251	0.0631923	0.80152	0.933506
L2-7_02278	L2-7_02278	0.0419195	5.67813	0.0837953	0.772219	0.923062
L2-7_00801	cobD	0.0420933	5.53324	0.0746844	0.784635	0.926094
L2-7_01661	L2-7_01661	0.0420966	4.45569	0.00349241	0.952875	0.98546
L2-7_01860	coaE	0.0424033	5.24157	0.104195	0.746853	0.916615
L2-7_00666	L2-7_00666	0.042645	6.97268	0.100673	0.751024	0.916615
L2-7_02444	rluD_2	0.0429828	3.35049	0.0434301	0.834918	0.946392
L2-7_00164	yhbU_1	0.0432708	6.93619	0.113272	0.736449	0.916615
L2-7_00663	L2-7_00663	0.0433198	6.52442	0.0439705	0.833909	0.946392
L2-7_01737	L2-7_01737	0.0434024	5.48077	0.0628384	0.802065	0.933506
L2-7_02740	L2-7_02740	0.043516	5.30791	0.0838487	0.772148	0.923062
L2-7_02927	L2-7_02927	0.0435849	2.67991	0.014152	0.905305	0.971353
L2-7_01901	L2-7_01901	0.0436032	9.15921	0.0756636	0.783262	0.925829
L2-7_01307	L2-7_01307	0.0445393	5.64313	0.0160009	0.89934	0.969006
L2-7_00748	L2-7_00748	0.0448309	4.06905	0.0239619	0.876982	0.96717
L2-7_00626	alr	0.0451471	5.67695	0.0851261	0.770467	0.923062
L2-7_01777	L2-7_01777	0.045367	6.43912	0.0573399	0.810751	0.937086
L2-7_02012	yncF	0.0455694	6.21062	0.0855318	0.769936	0.923062
L2-7_00262	L2-7_00262	0.0456841	6.02995	0.079002	0.778654	0.924487
L2-7_01638	L2-7_01638	0.0458288	7.67639	0.0823289	0.774166	0.923463
L2-7_02725	L2-7_02725	0.0458812	2.46188	0.0465032	0.829264	0.946173
L2-7_01933	yicL	0.046239	3.84323	0.0554414	0.813852	0.938537
L2-7_01735	rffA	0.0464086	8.57041	0.0890767	0.765354	0.922059
L2-7_01415	L2-7_01415	0.0464291	0.160717	0.0112997	0.915344	0.976692
L2-7_01871	ribF	0.0469443	7.99745	0.0770798	0.781294	0.92564
L2-7_02004	yheS_2	0.0470073	5.29052	0.100956	0.750685	0.916615
L2-7_00774	L2-7_00774	0.0472105	6.09947	0.0609451	0.805008	0.934784
L2-7_00035	minE	0.0472116	5.78061	0.139379	0.708899	0.907042
L2-7_00025	lspA	0.0476868	3.82713	0.0547099	0.815061	0.939063
L2-7_02292	gyrA_2	0.0479726	10.0322	0.0898141	0.764414	0.922059
L2-7_02191	argD_2	0.0492625	2.81479	0.0286601	0.865566	0.963957
L2-7_01488	L2-7_01488	0.0492684	5.23083	0.110196	0.739921	0.916615
L2-7_00689	ssuC_2	0.0497999	5.18004	0.11692	0.732399	0.916615
L2-7_00004	purD	0.0499156	9.86937	0.0615804	0.804015	0.934255
L2-7_00782	mapP	0.0502793	3.06694	0.0364274	0.848636	0.955738
L2-7_02942	rsmD	0.0504799	4.70788	0.114641	0.734921	0.916615
L2-7_01359	gyrA_1	0.0508327	6.85698	0.101334	0.750235	0.916615
L2-7_00771	yfhQ	0.0514222	5.76309	0.16188	0.687431	0.899651
L2-7_00453	L2-7_00453	0.0516273	0.888341	0.0323912	0.857172	0.959256
L2-7_00136	yehU_1	0.0519073	4.31582	0.0889809	0.765477	0.922059
L2-7_03015	baeS	0.0520288	1.96083	0.0596262	0.807088	0.935192
L2-7_00139	hpdA	0.0520324	4.2891	0.0590338	0.80803	0.935192
L2-7_01709	L2-7_01709	0.0520967	5.46643	0.0417812	0.838037	0.948377
L2-7_00504	pth	0.0521563	6.52272	0.100655	0.751046	0.916615
L2-7_01259	L2-7_01259	0.0522856	6.1741	0.170001	0.680111	0.898905
L2-7_00117	sigA_3	0.0524641	6.40496	0.109605	0.740594	0.916615
L2-7_00712	L2-7_00712	0.0528731	3.82387	0.0665259	0.796464	0.931355
L2-7_00719	tnpR_1	0.0539019	6.22963	0.161594	0.687694	0.899651
L2-7_00798	cobK	0.0543928	6.41424	0.107533	0.74297	0.916615
L2-7_02683	potD_3	0.0546409	5.19151	0.0757948	0.783079	0.925829
L2-7_00017	L2-7_00017	0.0551288	6.43215	0.22612	0.634416	0.881325
L2-7_00657	L2-7_00657	0.0552127	3.42563	0.101042	0.750582	0.916615
L2-7_00350	L2-7_00350	0.0552721	5.24756	0.121266	0.727665	0.915545
L2-7_02526	metF	0.05593	5.7281	0.121742	0.727153	0.915545
L2-7_00329	L2-7_00329	0.0561545	5.86419	0.110133	0.739993	0.916615
L2-7_02163	galK	0.056322	4.62877	0.0659859	0.797274	0.931593
L2-7_01810	L2-7_01810	0.0564051	3.02338	0.0277849	0.867616	0.964574
L2-7_01943	L2-7_01943	0.0565342	6.89137	0.111622	0.738305	0.916615
L2-7_01954	hisF	0.0567215	5.10315	0.0523107	0.81909	0.942156
L2-7_02735	metI	0.0570017	6.68627	0.0768537	0.781607	0.92564
L2-7_02494	gatA	0.0572258	8.3718	0.0937031	0.759521	0.919719
L2-7_02482	L2-7_02482	0.0575246	4.22814	0.0606814	0.805422	0.934877
L2-7_02892	opuBA	0.057969	5.45343	0.00780528	0.929601	0.983829
L2-7_00501	rsmF_1	0.0582192	7.12656	0.124005	0.724731	0.913535
L2-7_02932	yjiA	0.0594872	4.22396	0.148538	0.699936	0.903188
L2-7_01053	L2-7_01053	0.0599753	7.443	0.190873	0.662191	0.893736
L2-7_01075	pfkA1	0.0599868	7.8927	0.212311	0.644962	0.886283
L2-7_01637	L2-7_01637	0.0602725	6.79581	0.112758	0.737026	0.916615
L2-7_00141	L2-7_00141	0.0604802	2.7556	0.103079	0.748165	0.916615
L2-7_00256	L2-7_00256	0.0605442	5.0278	0.105516	0.745308	0.916615
L2-7_02710	hisC	0.0609343	7.74851	0.114505	0.735072	0.916615
L2-7_02495	gatB	0.0610893	8.66896	0.0950068	0.757906	0.919265
L2-7_01520	L2-7_01520	0.0614535	3.30851	0.047458	0.827547	0.945286
L2-7_00539	ribBA	0.0620445	11.9638	0.124369	0.724343	0.913535
L2-7_02006	rbr3A	0.0621188	10.1856	0.0327443	0.856404	0.95909
L2-7_02303	L2-7_02303	0.0632327	4.73496	0.0835726	0.772513	0.923062
L2-7_01363	L2-7_01363	0.0634455	5.83804	0.132339	0.716019	0.909514
L2-7_01425	rsrIM	0.0638495	7.67807	0.24078	0.623643	0.874564
L2-7_00486	rmlA1_1	0.0641124	9.74026	0.156146	0.69273	0.900209
L2-7_02488	disA	0.0642833	6.22511	0.323364	0.569593	0.85598
L2-7_02183	malQ_3	0.0642984	8.5703	0.185524	0.666668	0.893779
L2-7_00146	L2-7_00146	0.0645592	1.59165	0.0343399	0.852986	0.957175
L2-7_02570	L2-7_02570	0.0647205	2.2745	0.0754396	0.783575	0.925829
L2-7_00693	tyrS	0.0647348	8.50457	0.101901	0.74956	0.916615
L2-7_01615	nadD	0.0648871	6.27038	0.089364	0.764987	0.922059
L2-7_02685	potB_3	0.0649012	4.44825	0.0729733	0.787056	0.927526
L2-7_02338	L2-7_02338	0.0657581	3.09574	0.124035	0.724699	0.913535
L2-7_00120	L2-7_00120	0.0671152	8.22849	0.0969454	0.755527	0.918925
L2-7_00514	L2-7_00514	0.067409	4.19639	0.154802	0.693988	0.900256
L2-7_01666	L2-7_01666	0.0674459	4.75362	0.167779	0.682093	0.898913
L2-7_00605	L2-7_00605	0.0674799	3.01866	0.17996	0.671407	0.895123
L2-7_02592	rmlD	0.0679694	6.54727	0.0591649	0.807821	0.935192
L2-7_00722	L2-7_00722	0.0682837	2.47576	0.12142	0.727499	0.915545
L2-7_01636	L2-7_01636	0.0684383	7.3001	0.10957	0.740634	0.916615
L2-7_02880	hssR	0.0688376	2.23588	0.12875	0.719732	0.911703
L2-7_02168	L2-7_02168	0.0692191	6.44645	0.239975	0.624224	0.874564
L2-7_00736	L2-7_00736	0.0694899	2.71718	0.152207	0.696435	0.901761
L2-7_02164	galT	0.0694919	5.65745	0.13524	0.71306	0.908074
L2-7_01150	L2-7_01150	0.0696932	6.91395	0.286577	0.592423	0.862635
L2-7_00472	yfkJ	0.0697449	5.09947	0.217325	0.641085	0.886216
L2-7_02274	L2-7_02274	0.0698585	3.24619	0.0514874	0.820495	0.942611
L2-7_02591	rffG	0.0699292	6.17747	0.066343	0.796738	0.931355
L2-7_01634	L2-7_01634	0.0700985	6.35352	0.107379	0.743149	0.916615
L2-7_02920	L2-7_02920	0.0701025	5.23795	0.0752584	0.783829	0.925829
L2-7_01024	L2-7_01024	0.0703149	6.93005	0.190501	0.6625	0.893736
L2-7_00971	L2-7_00971	0.0703305	4.95746	0.139645	0.708634	0.907042
L2-7_02224	hhaIM_2	0.0706615	4.80922	0.246992	0.619201	0.870548
L2-7_01351	macB_1	0.0714445	7.19961	0.245221	0.62046	0.87188
L2-7_00718	L2-7_00718	0.0715751	6.15608	0.239517	0.624555	0.874564
L2-7_00743	tnpR_2	0.0716272	8.24239	0.221222	0.63811	0.883828
L2-7_00189	L2-7_00189	0.0718724	7.19256	0.390067	0.532264	0.840628
L2-7_02665	dus_2	0.0719111	8.13552	0.267862	0.60477	0.866764
L2-7_01357	pspB	0.0719197	5.17314	0.217262	0.641134	0.886216
L2-7_01939	L2-7_01939	0.0726864	9.71428	0.210802	0.646139	0.886622
L2-7_00565	serS	0.0728342	8.7137	0.152594	0.696069	0.901706
L2-7_02315	L2-7_02315	0.0728563	2.35461	0.0684611	0.793591	0.930708
L2-7_02884	cbh_2	0.0728926	4.23227	0.177606	0.673439	0.896032
L2-7_02413	ptsG_2	0.0729699	4.77695	0.314204	0.575112	0.85598
L2-7_00363	fgs_1	0.0732141	4.94903	0.187146	0.665303	0.893736
L2-7_01989	L2-7_01989	0.0740468	4.96918	0.139582	0.708697	0.907042
L2-7_00204	aroL	0.0743363	4.44563	0.174929	0.675767	0.896968
L2-7_02689	rpfG_2	0.074552	6.82638	0.26324	0.607903	0.866764
L2-7_02398	rsmH_2	0.0747453	6.70744	0.390661	0.531952	0.840628
L2-7_02644	L2-7_02644	0.0748486	4.14077	0.0159541	0.899487	0.969006
L2-7_01557	L2-7_01557	0.0752094	7.0207	0.257169	0.612072	0.868178
L2-7_02180	dnaC_2	0.0753963	8.33415	0.176911	0.674042	0.896032
L2-7_02015	rplK	0.0757564	10.9193	0.166118	0.683586	0.898913
L2-7_02736	metN	0.0758803	7.10675	0.123101	0.725695	0.914297
L2-7_00602	murG	0.0759161	8.27065	0.182808	0.668971	0.895123
L2-7_01681	L2-7_01681	0.0764305	5.24709	0.212187	0.645059	0.886283
L2-7_02595	L2-7_02595	0.077025	7.15377	0.0130525	0.909042	0.97256
L2-7_02941	coaD	0.0773717	5.3958	0.431708	0.511152	0.826927
L2-7_00692	L2-7_00692	0.0780478	4.47639	0.137528	0.710751	0.907449
L2-7_01294	L2-7_01294	0.0781366	2.7875	0.0729093	0.787147	0.927526
L2-7_01534	bioB_2	0.0783584	6.10769	0.380706	0.537226	0.842228
L2-7_02082	L2-7_02082	0.0788808	8.22479	0.23036	0.631257	0.879116
L2-7_02397	tagH	0.0790561	6.27347	0.253715	0.614471	0.868178
L2-7_00964	fldC	0.0790943	5.70958	0.36798	0.544107	0.845585
L2-7_01221	cca	0.0793557	8.30399	0.286303	0.592599	0.862635
L2-7_01529	L2-7_01529	0.0798162	4.41955	0.150241	0.698305	0.902098
L2-7_00191	mrnC	0.0800005	7.08143	0.292582	0.588571	0.862635
L2-7_00566	dacB	0.0801198	7.50076	0.0994842	0.752449	0.916615
L2-7_00026	aroB	0.0806941	6.20708	0.303953	0.581415	0.85879
L2-7_01109	L2-7_01109	0.0807455	5.62681	0.340367	0.559617	0.85326
L2-7_02254	L2-7_02254	0.0809686	6.02654	0.248094	0.61842	0.870522
L2-7_02236	gltB_2	0.0810635	9.58378	0.02377	0.877472	0.96717
L2-7_01936	tig_3	0.0819761	6.03959	0.231522	0.630397	0.878793
L2-7_00194	L2-7_00194	0.0822189	5.79923	0.400592	0.526784	0.838367
L2-7_00251	L2-7_00251	0.0822789	1.32155	0.0484977	0.825698	0.94492
L2-7_02247	ydfK	0.0829808	5.28584	0.0951092	0.75778	0.919265
L2-7_02885	selD	0.0835146	5.40505	0.325874	0.568099	0.855813
L2-7_02047	L2-7_02047	0.0835407	5.27201	0.20311	0.652222	0.891477
L2-7_02132	yesS_2	0.0836158	7.36179	0.344693	0.557133	0.85326
L2-7_02087	L2-7_02087	0.0839613	10.6999	0.0828737	0.77344	0.923463
L2-7_02019	ltaS_2	0.0841023	6.44015	0.360142	0.548428	0.849941
L2-7_01410	rpfC_1	0.0845488	6.72933	0.324116	0.569144	0.85598
L2-7_02670	L2-7_02670	0.0854126	7.51191	0.37918	0.538042	0.842228
L2-7_00534	ywlC	0.0856216	8.6491	0.345747	0.556531	0.85326
L2-7_01048	L2-7_01048	0.0857207	8.02185	0.315717	0.574193	0.85598
L2-7_02343	L2-7_02343	0.0862609	6.401	0.535253	0.464407	0.796369
L2-7_02583	L2-7_02583	0.0864477	3.52549	0.192041	0.661223	0.893736
L2-7_00118	L2-7_00118	0.0865407	7.45093	0.312082	0.576405	0.85598
L2-7_01626	moaA	0.0869096	6.02487	0.392388	0.531047	0.840628
L2-7_01143	gmr_2	0.0869533	6.63239	0.2264	0.634206	0.881325
L2-7_03059	L2-7_03059	0.0871228	4.78729	0.227579	0.633325	0.880683
L2-7_00294	trxA_1	0.0873559	5.55847	0.0495924	0.823774	0.943669
L2-7_01542	L2-7_01542	0.0873951	3.39898	0.136447	0.711839	0.907449
L2-7_02417	rpfG_1	0.0877336	8.09322	0.155754	0.693096	0.900209
L2-7_00589	L2-7_00589	0.0882338	7.31639	0.302391	0.582387	0.8593
L2-7_00625	rsmI	0.0883136	6.02292	0.399844	0.52717	0.838367
L2-7_02050	L2-7_02050	0.0884364	2.80247	0.163023	0.686389	0.899651
L2-7_01408	L2-7_01408	0.0887528	5.65538	0.173328	0.677171	0.897589
L2-7_02304	copA	0.088818	5.92601	0.373025	0.54136	0.843094
L2-7_02128	ileS	0.0892243	10.4316	0.304934	0.580806	0.858348
L2-7_02410	cinA	0.0892262	7.65957	0.411549	0.521184	0.834968
L2-7_01621	rng	0.0896557	4.9451	0.164055	0.68545	0.899594
L2-7_02564	valS	0.0897778	9.36495	0.3289	0.566308	0.85525
L2-7_01668	yesS_1	0.0898913	5.96415	0.45869	0.498237	0.818096
L2-7_00687	alsT_1	0.0901489	7.67163	0.0708147	0.790154	0.928696
L2-7_00647	L2-7_00647	0.0906457	7.46934	0.247894	0.618562	0.870522
L2-7_00974	L2-7_00974	0.0912037	3.38063	0.295311	0.586837	0.86135
L2-7_00347	acm	0.0912611	6.03035	0.41465	0.519619	0.834846
L2-7_01643	iap_1	0.0914607	2.47118	0.0951162	0.757771	0.919265
L2-7_01862	L2-7_01862	0.0916876	5.96389	0.469284	0.493317	0.81502
L2-7_01938	recG	0.0923652	7.013	0.187563	0.664952	0.893736
L2-7_01325	L2-7_01325	0.0925902	5.53777	0.202538	0.65268	0.891667
L2-7_01778	L2-7_01778	0.0925927	6.11873	0.18987	0.663025	0.893736
L2-7_02487	L2-7_02487	0.092669	5.3077	0.471589	0.492257	0.815001
L2-7_02668	L2-7_02668	0.0929468	2.5698	0.0481054	0.826393	0.94492
L2-7_00450	L2-7_00450	0.0931822	4.2947	0.492862	0.482653	0.808801
L2-7_01605	pleD	0.0933793	3.79124	0.230429	0.631206	0.879116
L2-7_01760	nadB_2	0.0939015	3.07157	0.114193	0.73542	0.916615
L2-7_00401	opuCA	0.0940541	5.19196	0.315125	0.574552	0.85598
L2-7_02545	L2-7_02545	0.0945247	5.93162	0.673773	0.411739	0.767194
L2-7_00675	tig_1	0.0945944	6.36211	0.283099	0.594677	0.863397
L2-7_01236	L2-7_01236	0.094787	0.884794	0.102918	0.748356	0.916615
L2-7_00793	cbiC	0.0949387	6.49609	0.32659	0.567674	0.855813
L2-7_02169	L2-7_02169	0.0951022	3.19981	0.117934	0.731286	0.916615
L2-7_02131	yehU_3	0.0962821	7.96096	0.525304	0.468588	0.798229
L2-7_02175	btuR	0.0965752	7.25071	0.269367	0.603757	0.866442
L2-7_00796	cbiK	0.0966875	6.72726	0.34361	0.557753	0.85326
L2-7_00773	hisA	0.0969711	5.06835	0.670065	0.413029	0.768627
L2-7_00343	eutL_1	0.0970057	5.762	0.564568	0.452425	0.788859
L2-7_02519	L2-7_02519	0.0970104	5.64504	0.330269	0.565501	0.85525
L2-7_01591	clpX_1	0.0971441	7.02814	0.389015	0.532818	0.840628
L2-7_01589	tsaD	0.0975035	6.50135	0.269369	0.603755	0.866442
L2-7_02016	rplA	0.0975717	11.8977	0.233496	0.628943	0.877639
L2-7_01940	L2-7_01940	0.097983	6.21628	0.440136	0.507057	0.825095
L2-7_01323	cutC	0.0981902	5.21584	0.152592	0.696071	0.901706
L2-7_02988	spo0C_6	0.0999036	0.181675	0.0648076	0.799053	0.932505
L2-7_00015	pyrD	0.100203	7.71025	0.395297	0.529528	0.840628
L2-7_00027	sepF	0.100291	7.86253	0.399793	0.527196	0.838367
L2-7_00634	L2-7_00634	0.100369	7.77954	0.391365	0.531583	0.840628
L2-7_00452	lexA_1	0.10065	1.30261	0.140517	0.707767	0.907042
L2-7_00612	L2-7_00612	0.101317	4.84489	0.338636	0.560618	0.85326
L2-7_01487	ptsH_2	0.101383	2.90884	0.323797	0.569335	0.85598
L2-7_01110	murE	0.102422	7.77955	0.633166	0.426196	0.777257
L2-7_02465	hgdC_2	0.10259	5.74138	0.570548	0.450041	0.787151
L2-7_01009	L2-7_01009	0.102925	6.54758	0.673602	0.411798	0.767194
L2-7_01500	hacA	0.102949	8.74913	0.289636	0.590454	0.862635
L2-7_00664	L2-7_00664	0.103621	6.1944	0.382041	0.536513	0.842228
L2-7_00792	cobT	0.104181	7.83484	0.313559	0.575504	0.85598
L2-7_01625	mog	0.105107	6.07508	0.403246	0.525418	0.837917
L2-7_01038	L2-7_01038	0.106511	5.21717	0.6315	0.426806	0.777257
L2-7_01904	L2-7_01904	0.106568	5.42423	0.491627	0.483202	0.808801
L2-7_01915	licR_2	0.106669	12.0859	0.187106	0.665337	0.893736
L2-7_02768	L2-7_02768	0.106694	7.74158	0.558074	0.455037	0.790939
L2-7_01418	L2-7_01418	0.106894	2.29574	0.181492	0.670094	0.895123
L2-7_00533	L2-7_00533	0.106939	7.32951	0.652133	0.419351	0.775166
L2-7_02441	cat1_2	0.107271	9.53099	0.209453	0.647197	0.887446
L2-7_00295	pspE	0.107308	5.66593	0.0728039	0.787297	0.927526
L2-7_02428	L2-7_02428	0.107631	4.62916	0.465712	0.494966	0.815821
L2-7_02979	bvgS_2	0.10778	6.26759	0.630029	0.427345	0.777257
L2-7_02870	L2-7_02870	0.108478	1.81167	0.264294	0.607185	0.866764
L2-7_02586	L2-7_02586	0.108664	3.76886	0.366857	0.544722	0.846071
L2-7_02270	L2-7_02270	0.108936	3.38056	0.383215	0.535888	0.842228
L2-7_02516	L2-7_02516	0.10987	6.03312	0.377251	0.539078	0.842228
L2-7_02445	bcrC	0.110378	1.98636	0.189299	0.663501	0.893736
L2-7_00124	L2-7_00124	0.110826	6.01527	0.591231	0.441944	0.783027
L2-7_00646	fhs	0.111131	10.5492	0.389229	0.532705	0.840628
L2-7_02612	rnhA	0.111602	3.47023	0.430511	0.511739	0.826927
L2-7_01730	L2-7_01730	0.112362	4.85019	0.222148	0.637408	0.883729
L2-7_01122	tal	0.113436	7.25979	0.0714474	0.789241	0.928085
L2-7_01976	proA	0.11364	8.81901	0.375235	0.540164	0.843094
L2-7_02151	mtnK_2	0.114332	8.42828	0.351565	0.553228	0.851576
L2-7_01432	L2-7_01432	0.114553	2.22486	0.16978	0.680307	0.898905
L2-7_02971	L2-7_02971	0.114814	5.42583	0.700043	0.402769	0.760335
L2-7_01770	nnr	0.114913	6.45223	0.474166	0.491077	0.815001
L2-7_00721	tipA	0.115123	4.61773	0.471433	0.492329	0.815001
L2-7_01802	L2-7_01802	0.115337	4.25188	0.110985	0.739025	0.916615
L2-7_00246	argH1	0.115469	8.10085	0.577401	0.447333	0.785042
L2-7_00952	crh	0.115749	7.05301	0.290645	0.589807	0.862635
L2-7_02449	tvaI	0.116042	7.4869	0.177101	0.673876	0.896032
L2-7_00389	codY	0.116296	6.43419	0.214435	0.643313	0.886216
L2-7_01245	pepF1	0.116352	6.79374	0.606906	0.435955	0.779869
L2-7_01370	L2-7_01370	0.116472	4.99634	0.566827	0.451522	0.788459
L2-7_01068	rnr	0.116556	6.93212	0.852676	0.355796	0.725576
L2-7_02518	L2-7_02518	0.116924	5.72934	0.631628	0.426759	0.777257
L2-7_01064	frr	0.117648	7.97298	0.542568	0.46137	0.79528
L2-7_01174	L2-7_01174	0.117716	4.70948	0.186924	0.66549	0.893736
L2-7_00359	era	0.117859	7.07494	0.757916	0.383982	0.747077
L2-7_02898	xre	0.118223	2.08573	0.038856	0.843734	0.952132
L2-7_00935	coaBC	0.118513	9.52795	0.156683	0.692229	0.900209
L2-7_01070	L2-7_01070	0.118584	7.88854	0.862143	0.35314	0.724907
L2-7_01776	der	0.118735	7.40922	0.865791	0.352123	0.72388
L2-7_01751	ftsL	0.119123	2.96757	0.260906	0.609499	0.866911
L2-7_00772	L2-7_00772	0.1192	4.64465	0.72766	0.393643	0.753034
L2-7_02582	L2-7_02582	0.120302	5.01357	0.502024	0.478612	0.804565
L2-7_01247	L2-7_01247	0.120707	5.26223	0.815875	0.366389	0.734351
L2-7_02512	L2-7_02512	0.120715	4.36103	0.533849	0.464993	0.796887
L2-7_00746	L2-7_00746	0.120749	3.57058	0.380121	0.537539	0.842228
L2-7_02262	cysE_1	0.12089	7.70959	0.621634	0.430441	0.777808
L2-7_01872	truB	0.121001	8.00009	0.454309	0.500296	0.819304
L2-7_00209	L2-7_00209	0.121376	4.88878	0.720275	0.396054	0.755441
L2-7_00195	L2-7_00195	0.121394	4.28162	0.76375	0.382158	0.746206
L2-7_00546	L2-7_00546	0.121542	2.4643	0.137307	0.710973	0.907449
L2-7_02479	ltaS1_1	0.121602	7.16187	0.277715	0.598203	0.866294
L2-7_02489	L2-7_02489	0.121667	7.08039	0.952539	0.329074	0.714288
L2-7_02205	L2-7_02205	0.121808	1.37693	0.197095	0.657076	0.89269
L2-7_02534	upp	0.121865	7.67228	0.505594	0.477052	0.804565
L2-7_02883	ywaC_3	0.122003	3.35036	0.40956	0.522193	0.835151
L2-7_01467	mec	0.122037	5.38467	0.645067	0.421882	0.775166
L2-7_02712	prmC	0.122187	6.58061	0.172935	0.677516	0.897589
L2-7_00992	L2-7_00992	0.122495	1.69726	0.132994	0.715348	0.90944
L2-7_00261	hsdR_2	0.122887	7.5041	0.857555	0.354424	0.725366
L2-7_02422	ogt	0.123285	4.49212	0.877102	0.348997	0.723328
L2-7_02940	L2-7_02940	0.123328	6.36197	1.15348	0.282822	0.683162
L2-7_00617	L2-7_00617	0.123539	3.48507	0.25202	0.615656	0.868178
L2-7_00423	L2-7_00423	0.123754	4.62392	0.422232	0.515825	0.832092
L2-7_01786	trmD	0.124385	6.91335	0.728569	0.393348	0.753034
L2-7_01856	L2-7_01856	0.124768	3.57199	0.109627	0.74057	0.916615
L2-7_01977	proB	0.12496	7.82885	0.409749	0.522097	0.835151
L2-7_00682	L2-7_00682	0.125436	6.80965	1.05493	0.304375	0.70601
L2-7_01074	bar	0.125488	6.02027	0.660599	0.416349	0.771567
L2-7_02778	idnD	0.12549	8.55992	0.641888	0.423028	0.775166
L2-7_00113	L2-7_00113	0.125907	6.55448	0.737273	0.390536	0.751567
L2-7_01705	L2-7_01705	0.126106	6.09617	0.651218	0.419678	0.775166
L2-7_00531	L2-7_00531	0.126395	6.94287	0.864457	0.352494	0.724112
L2-7_00508	murC	0.126855	8.52031	0.610379	0.434645	0.779331
L2-7_01806	sgcG_1	0.127528	5.32906	0.84155	0.358954	0.728853
L2-7_02344	L2-7_02344	0.128076	4.43252	0.722629	0.395283	0.754484
L2-7_01094	L2-7_01094	0.128131	6.21747	0.656744	0.417712	0.77307
L2-7_02432	mepA_13	0.128341	6.03978	0.683145	0.408506	0.764108
L2-7_00607	mntP	0.12879	1.28923	0.310487	0.577382	0.85598
L2-7_02272	L2-7_02272	0.129058	6.62315	0.917702	0.338079	0.720112
L2-7_00043	mdeA_1	0.129306	6.44533	0.854694	0.355228	0.725366
L2-7_02243	yabJ	0.129375	6.068	0.658666	0.417031	0.772321
L2-7_01112	def_1	0.129446	6.00835	1.38169	0.239813	0.66938
L2-7_01769	ndoA_2	0.129909	4.45679	0.463363	0.496057	0.816738
L2-7_01522	L2-7_01522	0.13033	3.76538	0.480509	0.488192	0.814234
L2-7_02378	L2-7_02378	0.130827	6.05152	0.631177	0.426924	0.777257
L2-7_01328	btr_2	0.130882	5.11945	0.328152	0.566749	0.85525
L2-7_02017	lytC_2	0.131243	8.56133	0.629704	0.427464	0.777257
L2-7_00338	L2-7_00338	0.13159	6.20172	0.688529	0.406665	0.761792
L2-7_02443	L2-7_02443	0.131668	8.2913	0.606427	0.436136	0.779869
L2-7_00631	spmB	0.131699	3.12995	0.478197	0.48924	0.814273
L2-7_00700	ybbH_1	0.131723	2.3851	0.339894	0.559891	0.85326
L2-7_01671	mglB_2	0.131761	8.65963	0.15639	0.692502	0.900209
L2-7_01665	mglB_1	0.131904	5.40959	0.698664	0.403233	0.760335
L2-7_00422	L2-7_00422	0.132178	3.48258	0.252533	0.615297	0.868178
L2-7_01300	atpH_2	0.132554	4.9192	0.195713	0.658204	0.89269
L2-7_01503	DmdB	0.132555	6.21068	0.380581	0.537292	0.842228
L2-7_02627	L2-7_02627	0.132669	3.50259	0.186116	0.666169	0.893736
L2-7_02074	L2-7_02074	0.132691	6.67529	1.20842	0.271646	0.679858
L2-7_01102	L2-7_01102	0.133297	6.00515	1.15939	0.281593	0.681969
L2-7_01614	L2-7_01614	0.133389	5.74507	0.439951	0.507146	0.825095
L2-7_00237	preT	0.133422	3.41412	0.264489	0.607053	0.866764
L2-7_01688	L2-7_01688	0.133539	3.57153	0.309503	0.577985	0.85598
L2-7_01318	L2-7_01318	0.134033	5.08695	0.265722	0.606216	0.866764
L2-7_01466	L2-7_01466	0.134092	3.74596	0.468179	0.493826	0.81538
L2-7_02882	ywiE_2	0.134947	5.12963	0.75156	0.385983	0.748459
L2-7_00144	cbh_1	0.135109	5.4031	1.03336	0.309372	0.706676
L2-7_02311	hin	0.135385	3.21988	0.516214	0.472461	0.802082
L2-7_01930	L2-7_01930	0.135578	3.43188	0.871415	0.350564	0.723328
L2-7_00028	L2-7_00028	0.136289	5.18285	0.783927	0.375943	0.742681
L2-7_00339	pduV_1	0.13641	5.36851	0.909806	0.340166	0.720112
L2-7_02167	ldh_1	0.136969	6.32619	0.932681	0.334167	0.717451
L2-7_01978	glnQ_2	0.137184	10.7209	0.540963	0.462034	0.79528
L2-7_01773	leuA_2	0.137235	6.04985	0.0998567	0.752002	0.916615
L2-7_02420	lon1_2	0.137452	9.27358	0.66709	0.414068	0.769282
L2-7_01101	L2-7_01101	0.13871	7.16801	0.810522	0.367966	0.735057
L2-7_00312	L2-7_00312	0.139048	3.57375	0.458082	0.498522	0.818096
L2-7_00238	preA	0.139453	3.38244	0.403338	0.52537	0.837917
L2-7_02756	L2-7_02756	0.139517	5.7918	0.844523	0.358106	0.72841
L2-7_02766	pcrA	0.139944	7.85453	0.981667	0.321788	0.709194
L2-7_00223	asd2	0.140282	9.21296	0.261509	0.609086	0.866764
L2-7_01358	parE	0.140441	6.44507	0.872564	0.350246	0.723328
L2-7_01361	L2-7_01361	0.140518	0.469074	0.214591	0.643192	0.886216
L2-7_01057	addA	0.140689	6.6657	0.69617	0.404074	0.760897
L2-7_01232	L2-7_01232	0.141128	-0.0555139	0.167806	0.682069	0.898913
L2-7_00110	L2-7_00110	0.141313	4.2408	0.590492	0.442229	0.783027
L2-7_02709	glgA_3	0.14174	8.96716	0.701628	0.402237	0.760335
L2-7_02723	fliY	0.141741	4.95592	0.879781	0.348262	0.723328
L2-7_02192	dhaT	0.141844	5.08365	0.755511	0.384737	0.747077
L2-7_02956	tgt	0.142172	8.04934	1.11194	0.291661	0.689648
L2-7_02799	macB_4	0.142255	1.2425	0.207832	0.648472	0.888517
L2-7_01942	L2-7_01942	0.142357	6.03221	0.771582	0.379728	0.745062
L2-7_00854	L2-7_00854	0.142602	4.48244	1.09066	0.296325	0.693198
L2-7_01395	glgA_2	0.142652	7.36015	1.31887	0.250795	0.675575
L2-7_01348	L2-7_01348	0.142981	12.182	0.587143	0.443526	0.783068
L2-7_00348	pduV_2	0.142997	5.7163	0.970873	0.324462	0.712663
L2-7_02060	L2-7_02060	0.143404	4.31373	0.466822	0.494453	0.815612
L2-7_00123	L2-7_00123	0.143879	7.48401	1.14312	0.284994	0.684019
L2-7_01252	mepA_8	0.14486	5.87465	0.603093	0.4374	0.780502
L2-7_00192	L2-7_00192	0.144978	8.12423	0.840604	0.359224	0.728853
L2-7_00016	pyrK_1	0.145101	7.36533	0.957744	0.327756	0.714131
L2-7_00699	L2-7_00699	0.145755	4.88896	0.944326	0.331168	0.714894
L2-7_00196	L2-7_00196	0.145976	4.08998	0.747642	0.387224	0.749632
L2-7_00330	L2-7_00330	0.146719	5.57986	0.475219	0.490596	0.815001
L2-7_00624	L2-7_00624	0.147028	5.72966	1.05263	0.304902	0.706045
L2-7_02577	L2-7_02577	0.147205	3.20542	0.610171	0.434723	0.779331
L2-7_02389	rluF	0.147386	6.61077	0.940869	0.332054	0.715705
L2-7_02664	epr	0.147982	8.62909	0.705914	0.400804	0.760335
L2-7_02679	L2-7_02679	0.148315	2.25192	0.503824	0.477824	0.804565
L2-7_02767	L2-7_02767	0.148504	8.151	1.24296	0.264902	0.676959
L2-7_02408	sigE	0.148505	0.280349	0.236541	0.626716	0.876213
L2-7_02535	pbuG	0.14881	9.51275	0.782504	0.376376	0.742681
L2-7_02265	L2-7_02265	0.14902	5.83882	0.818527	0.365611	0.73421
L2-7_01639	zupT_2	0.14939	7.84875	0.727695	0.393631	0.753034
L2-7_00298	L2-7_00298	0.149495	5.34962	0.213037	0.644397	0.886283
L2-7_02263	L2-7_02263	0.149585	5.3231	1.51981	0.217649	0.656355
L2-7_02960	purC	0.149664	9.62716	0.470272	0.492862	0.815001
L2-7_01779	L2-7_01779	0.149824	3.61609	0.329561	0.565918	0.85525
L2-7_02018	L2-7_02018	0.151034	5.4633	1.37652	0.240695	0.669384
L2-7_01316	L2-7_01316	0.151107	4.50688	0.304928	0.580809	0.858348
L2-7_02154	yoeB	0.151699	2.50622	0.386006	0.534406	0.841239
L2-7_00554	L2-7_00554	0.151716	5.16102	0.62136	0.430542	0.777808
L2-7_00649	L2-7_00649	0.151962	6.30324	0.588094	0.443157	0.783068
L2-7_01003	fus	0.152088	10.6704	0.259079	0.610754	0.867816
L2-7_01547	L2-7_01547	0.152496	4.83941	0.181004	0.670512	0.895123
L2-7_02609	L2-7_02609	0.152503	6.65081	0.175367	0.675386	0.896968
L2-7_00410	L2-7_00410	0.152628	6.41319	0.624878	0.42924	0.777808
L2-7_02923	ung	0.153089	6.10933	1.26599	0.260521	0.676959
L2-7_01707	L2-7_01707	0.153159	7.8241	1.27256	0.259287	0.676959
L2-7_01312	L2-7_01312	0.15417	8.10616	1.29489	0.255149	0.676371
L2-7_02472	ecfT_4	0.154485	3.75648	0.434718	0.509683	0.825987
L2-7_01703	lon1_1	0.154932	7.73469	0.694757	0.404551	0.761106
L2-7_01179	glf	0.155277	5.47536	0.277471	0.598364	0.866294
L2-7_00473	L2-7_00473	0.155424	6.28843	1.15168	0.283197	0.683477
[truncated: 803 more rows]

## Sheet: Table S8. DEG A.s. L2-7;L vs GL
Locus ID	Gene Name	logFC	logCPM	LR	PValue	FDR
L2-7_01828	hrcA	-6.18736	12.468	29.3835	5.94e-08	3.86e-07
L2-7_01686	ctc	-5.30592	8.03179	164.426	1.22e-37	1.01e-35
L2-7_01926	trpB_1	-5.04213	7.35943	77.3573	1.43e-18	2.8e-17
L2-7_01927	trpA	-4.94739	7.04043	71.3846	2.94e-17	5.15e-16
L2-7_01347	L2-7_01347	-4.70865	7.42378	147.624	5.73e-34	3.42e-32
L2-7_02160	L2-7_02160	-4.69838	7.11969	404.417	6.02e-90	1.69e-86
L2-7_01925	trpF	-4.68365	5.66144	77.7041	1.2e-18	2.4e-17
L2-7_02642	L2-7_02642	-4.44351	4.54007	41.8507	9.85e-11	9.97e-10
L2-7_03052	L2-7_03052	-4.43835	6.03259	37.3104	1.01e-09	8.61e-09
L2-7_00333	cstA	-4.35563	6.59769	49.2087	2.3e-12	2.89e-11
L2-7_00088	L2-7_00088	-4.30863	1.75741	16.6556	4.48e-05	0.000174757
L2-7_01923	pabA	-4.26248	5.66307	90.7512	1.63e-21	3.84e-20
L2-7_02641	L2-7_02641	-4.20342	1.93535	36.964	1.2e-09	1.01e-08
L2-7_01924	trpC	-4.1957	6.08873	73.8257	8.53e-18	1.56e-16
L2-7_00094	L2-7_00094	-4.094	-0.150797	15.3735	8.82e-05	0.000326523
L2-7_02647	L2-7_02647	-3.98358	2.50525	41.2933	1.31e-10	1.31e-09
L2-7_02645	L2-7_02645	-3.9672	1.1537	26.3767	2.81e-07	1.67e-06
L2-7_02640	L2-7_02640	-3.82713	1.27812	20.0167	7.68e-06	3.51e-05
L2-7_02190	L2-7_02190	-3.81992	-0.0964873	20.0438	7.57e-06	3.48e-05
L2-7_02158	L2-7_02158	-3.73323	7.70608	95.2534	1.68e-22	4.12e-21
L2-7_00084	L2-7_00084	-3.68414	1.44667	14.021	0.000180782	0.000631609
L2-7_01679	thrZ	-3.62208	8.596	74.3484	6.55e-18	1.22e-16
L2-7_00650	pckA	-3.61496	11.2004	65.9642	4.59e-16	7.61e-15
L2-7_02437	htpG	-3.6078	9.32143	21.3138	3.9e-06	1.88e-05
L2-7_01922	trpE_2	-3.58238	5.52833	78.9783	6.28e-19	1.28e-17
L2-7_01026	egsA_2	-3.57275	5.21885	44.4489	2.61e-11	2.87e-10
L2-7_01921	trpE_1	-3.57094	4.31325	73.3675	1.08e-17	1.95e-16
L2-7_02648	L2-7_02648	-3.55897	3.45115	45.5679	1.47e-11	1.66e-10
L2-7_02892	opuBA	-3.54483	5.45343	23.5881	1.19e-06	6.38e-06
L2-7_02646	L2-7_02646	-3.51601	2.06629	27.3639	1.69e-07	1.02e-06
L2-7_02669	pepD_2	-3.50548	8.49381	47.7498	4.84e-12	5.8e-11
L2-7_01928	ybaK	-3.47877	5.44718	64.469	9.81e-16	1.58e-14
L2-7_02500	L2-7_02500	-3.46951	0.889419	17.1467	3.46e-05	0.000139901
L2-7_03079	L2-7_03079	-3.4489	2.28906	7.5359	0.00604816	0.0139711
L2-7_00172	groS	-3.44459	7.41102	24.0811	9.24e-07	5e-06
L2-7_02894	L2-7_02894	-3.4304	6.39451	18.4746	1.72e-05	7.34e-05
L2-7_01835	trpD	-3.40442	7.51	71.1227	3.36e-17	5.84e-16
L2-7_02893	L2-7_02893	-3.33786	4.99721	23.5208	1.24e-06	6.58e-06
L2-7_02644	L2-7_02644	-3.33143	4.14077	25.4332	4.58e-07	2.6e-06
L2-7_02084	ylaC	-3.31272	4.71691	73.8008	8.64e-18	1.57e-16
L2-7_02157	glpF_1	-3.28146	7.57356	69.9754	6e-17	1.03e-15
L2-7_00085	L2-7_00085	-3.23914	3.02285	10.9848	0.000918616	0.00265084
L2-7_01741	cysA_2	-3.21388	8.65154	122.944	1.43e-28	6.09e-27
L2-7_01367	ydfJ	-3.19749	6.43789	18.2953	1.89e-05	7.96e-05
L2-7_00086	L2-7_00086	-3.19511	3.57611	11.6861	0.00062969	0.00190745
L2-7_01739	L2-7_01739	-3.18314	9.19993	109.841	1.06e-25	3.42e-24
L2-7_02933	L2-7_02933	-3.14068	4.90574	152.349	5.32e-35	3.55e-33
L2-7_00087	L2-7_00087	-3.09986	3.89684	10.6839	0.0010807	0.00306181
L2-7_01829	L2-7_01829	-3.08734	9.02066	20.0601	7.5e-06	3.45e-05
L2-7_02649	L2-7_02649	-3.06356	1.29087	31.9784	1.56e-08	1.11e-07
L2-7_02324	L2-7_02324	-3.05818	1.77369	30.5688	3.22e-08	2.17e-07
L2-7_01366	L2-7_01366	-3.01938	7.74343	13.5187	0.000236196	0.000797375
L2-7_00962	pfkA_1	-2.99083	9.87433	209.202	2.05e-47	2.87e-45
L2-7_01182	potA_3	-2.98177	1.02473	34.0655	5.33e-09	4.12e-08
L2-7_00173	groL	-2.96234	10.2996	20.8631	4.93e-06	2.35e-05
L2-7_00101	L2-7_00101	-2.94991	1.90106	13.4675	0.000242728	0.000816476
L2-7_02436	ywaC_2	-2.9188	8.36425	16.7618	4.24e-05	0.000167006
L2-7_02161	L2-7_02161	-2.90575	1.91166	20.9012	4.84e-06	2.3e-05
L2-7_00838	lrpC	-2.89862	2.58097	86.154	1.66e-20	3.62e-19
L2-7_01738	ldhB	-2.87581	8.55316	77.3593	1.43e-18	2.8e-17
L2-7_01773	leuA_2	-2.87213	6.04985	37.3648	9.8e-10	8.4e-09
L2-7_02891	L2-7_02891	-2.87065	5.81491	24.2026	8.67e-07	4.73e-06
L2-7_03061	L2-7_03061	-2.86334	2.56172	5.9625	0.0146133	0.0301742
L2-7_02085	L2-7_02085	-2.8199	6.49776	76.913	1.79e-18	3.48e-17
L2-7_01298	atpG_2	-2.81408	5.8815	82.1877	1.24e-19	2.61e-18
L2-7_00093	L2-7_00093	-2.78757	0.427755	14.7128	0.000125192	0.000450883
L2-7_00095	L2-7_00095	-2.76891	1.25214	12.632	0.000379197	0.0012255
L2-7_01740	L2-7_01740	-2.74644	8.53615	106.083	7.07e-25	2.15e-23
L2-7_00081	L2-7_00081	-2.74588	3.00433	8.40069	0.00375079	0.0091151
L2-7_02834	codB	-2.72868	6.05137	70.868	3.82e-17	6.57e-16
L2-7_02235	gltB_1	-2.70154	8.52615	31.4821	2.01e-08	1.38e-07
L2-7_02193	davT	-2.68704	2.73014	27.8643	1.3e-07	8.07e-07
L2-7_03073	L2-7_03073	-2.68142	2.46292	6.22484	0.012597	0.0265191
L2-7_00357	ilvC	-2.68081	11.1749	31.7555	1.75e-08	1.22e-07
L2-7_01297	atpD_2	-2.67378	7.09098	86.9728	1.1e-20	2.47e-19
L2-7_01797	L2-7_01797	-2.66947	1.25653	27.4785	1.59e-07	9.68e-07
L2-7_02156	L2-7_02156	-2.65478	4.00238	102.691	3.92e-24	1.1e-22
L2-7_00953	whiA	-2.64093	9.0766	119.12	9.86e-28	3.84e-26
L2-7_00083	L2-7_00083	-2.58138	0.688663	5.27564	0.0216258	0.0423449
L2-7_01830	dnaK_1	-2.57052	11.3752	15.8816	6.74e-05	0.000253614
L2-7_01633	clpB_2	-2.55046	9.2154	9.47777	0.00207976	0.00545646
L2-7_00098	L2-7_00098	-2.54555	1.05684	9.3005	0.00229092	0.00593816
L2-7_01299	atpA_2	-2.53571	6.95528	95.5096	1.47e-22	3.65e-21
L2-7_00954	L2-7_00954	-2.51914	9.6442	118.207	1.56e-27	5.84e-26
L2-7_01180	L2-7_01180	-2.51752	3.2743	39.6918	2.97e-10	2.81e-09
L2-7_01184	ydcV_2	-2.51359	1.06284	46.949	7.29e-12	8.58e-11
L2-7_00840	yxlF_2	-2.50475	4.5154	44.2885	2.83e-11	3.07e-10
L2-7_00955	murB	-2.49256	9.75934	101.33	7.79e-24	2.12e-22
L2-7_00761	L2-7_00761	-2.45564	3.14405	43.0241	5.41e-11	5.7e-10
L2-7_01183	potB_2	-2.44873	0.914448	40.283	2.2e-10	2.12e-09
L2-7_03018	cpsB	-2.44015	2.05033	31.6153	1.88e-08	1.3e-07
L2-7_00837	rlmH_2	-2.43826	3.06613	36.6274	1.43e-09	1.19e-08
L2-7_01399	L2-7_01399	-2.42917	5.0585	114.216	1.17e-26	3.95e-25
L2-7_00069	L2-7_00069	-2.39754	0.518584	8.14522	0.00431748	0.0103931
L2-7_00097	L2-7_00097	-2.39119	1.57555	8.94107	0.0027883	0.00708325
L2-7_03050	L2-7_03050	-2.37882	1.80223	36.0601	1.91e-09	1.57e-08
L2-7_00266	tetO_1	-2.3776	4.85191	52.2717	4.83e-13	6.39e-12
L2-7_02236	gltB_2	-2.37488	9.58378	18.4332	1.76e-05	7.49e-05
L2-7_02072	L2-7_02072	-2.3701	-0.261802	13.4601	0.000243692	0.000818616
L2-7_01296	atpC_2	-2.33191	5.83381	55.589	8.93e-14	1.27e-12
L2-7_01030	glgB_3	-2.32917	8.23824	21.3633	3.8e-06	1.85e-05
L2-7_02668	L2-7_02668	-2.28779	2.5698	22.9951	1.62e-06	8.51e-06
L2-7_01478	iscR_1	-2.28501	1.01298	22.9432	1.67e-06	8.67e-06
L2-7_01398	putP_1	-2.27786	4.942	50.9189	9.63e-13	1.25e-11
L2-7_00082	L2-7_00082	-2.27716	0.924768	5.75194	0.0164705	0.0334907
L2-7_01603	ybiV	-2.27037	5.51157	118.166	1.59e-27	5.88e-26
L2-7_02071	L2-7_02071	-2.2582	3.04161	41.2537	1.34e-10	1.33e-09
L2-7_02335	L2-7_02335	-2.24816	5.91585	103.14	3.12e-24	8.84e-23
L2-7_02873	L2-7_02873	-2.24806	4.26133	88.3765	5.41e-21	1.24e-19
L2-7_00102	L2-7_00102	-2.24616	1.82406	9.58768	0.00195888	0.00516347
L2-7_00839	gdhA	-2.22559	11.0803	62.4728	2.7e-15	4.23e-14
L2-7_01476	L2-7_01476	-2.22552	0.97492	12.3615	0.000438277	0.00139393
L2-7_01833	gpr	-2.22262	1.39311	11.7457	0.000609826	0.00185128
L2-7_00946	lacC	-2.22206	7.07136	47.803	4.71e-12	5.67e-11
L2-7_02695	L2-7_02695	-2.19881	5.56825	41.5843	1.13e-10	1.13e-09
L2-7_00079	L2-7_00079	-2.18634	3.21061	5.54954	0.0184855	0.0371035
L2-7_00089	L2-7_00089	-2.18511	0.448144	8.78498	0.00303722	0.00759846
L2-7_00702	L2-7_00702	-2.15862	2.02732	56.9574	4.45e-14	6.43e-13
L2-7_01300	atpH_2	-2.14747	4.9192	44.9375	2.03e-11	2.25e-10
L2-7_00826	tcyB	-2.14701	5.10618	37.4615	9.32e-10	8.01e-09
L2-7_01303	atpB_2	-2.1405	5.68429	70.8864	3.78e-17	6.54e-16
L2-7_01185	potD_2	-2.11846	0.821432	36.1503	1.83e-09	1.51e-08
L2-7_01935	L2-7_01935	-2.10317	5.77398	130.074	3.95e-30	1.87e-28
L2-7_01301	atpF_2	-2.10026	4.81843	42.8678	5.86e-11	6.15e-10
L2-7_00096	L2-7_00096	-2.09615	1.67779	7.91058	0.00491464	0.0116603
L2-7_02856	L2-7_02856	-2.08967	-0.0380528	22.106	2.58e-06	1.31e-05
L2-7_01604	L2-7_01604	-2.06758	5.30397	116.122	4.47e-27	1.59e-25
L2-7_00500	amt	-2.04767	1.93047	31.6672	1.83e-08	1.27e-07
L2-7_00078	L2-7_00078	-2.03331	2.88499	6.10911	0.0134487	0.0281342
L2-7_02872	mgrA	-2.0256	3.98587	86.7156	1.25e-20	2.76e-19
L2-7_00075	L2-7_00075	-1.99905	2.33358	4.78907	0.028641	0.0541877
L2-7_01836	lepA	-1.99118	9.19273	40.3771	2.09e-10	2.04e-09
L2-7_01742	L2-7_01742	-1.98611	3.78111	33.8549	5.94e-09	4.53e-08
L2-7_02325	L2-7_02325	-1.96337	0.923577	10.253	0.00136465	0.00374927
L2-7_00827	tcyC	-1.9595	5.78695	38.0806	6.79e-10	5.98e-09
L2-7_02454	L2-7_02454	-1.95644	3.29924	20.5244	5.89e-06	2.76e-05
L2-7_01759	nadA	-1.95101	2.28448	42.35	7.63e-11	7.86e-10
L2-7_03049	L2-7_03049	-1.93772	4.29825	33.4859	7.18e-09	5.41e-08
L2-7_01477	nadB_1	-1.93752	3.45066	21.2927	3.94e-06	1.9e-05
L2-7_00080	L2-7_00080	-1.93745	3.1043	4.16177	0.0413462	0.0748399
L2-7_02179	L2-7_02179	-1.91785	4.89126	45.9794	1.2e-11	1.36e-10
L2-7_00841	L2-7_00841	-1.91777	3.36628	38.6634	5.04e-10	4.52e-09
L2-7_00090	hhaIM_1	-1.91655	2.68606	8.73803	0.00311641	0.00777575
L2-7_00290	dinB_2	-1.91346	1.72424	32.6705	1.09e-08	8.01e-08
L2-7_01475	cysD_2	-1.90138	2.54568	16.8547	4.04e-05	0.000160384
L2-7_00572	patA_2	-1.90007	9.43573	11.0796	0.000872847	0.00253442
L2-7_00284	L2-7_00284	-1.89903	1.21196	9.07457	0.00259188	0.00663844
L2-7_02031	L2-7_02031	-1.89772	4.41104	76.5487	2.15e-18	4.12e-17
L2-7_00483	tuaA	-1.89448	3.98003	52.6441	4e-13	5.39e-12
L2-7_00620	speA	-1.87733	4.4964	48.9888	2.57e-12	3.21e-11
L2-7_02895	L2-7_02895	-1.87444	5.86545	25.2089	5.14e-07	2.88e-06
L2-7_01479	cysK_1	-1.87314	2.56645	19.1297	1.22e-05	5.41e-05
L2-7_01158	spoIIIAE	-1.86783	0.373733	21.6474	3.28e-06	1.62e-05
L2-7_00073	L2-7_00073	-1.85056	4.56598	5.22762	0.0222309	0.0432576
L2-7_02874	L2-7_02874	-1.84454	4.31434	73.9847	7.87e-18	1.45e-16
L2-7_01832	prmA	-1.84338	9.1992	13.6468	0.00022062	0.000750213
L2-7_01955	hisH1	-1.84322	4.9771	43.6343	3.96e-11	4.22e-10
L2-7_00076	L2-7_00076	-1.83749	2.3641	5.1539	0.0231943	0.0449139
L2-7_02062	pdxS	-1.83621	6.10469	7.42424	0.00643511	0.0147434
L2-7_01834	L2-7_01834	-1.8331	1.85786	14.2806	0.000157482	0.00055645
L2-7_02831	L2-7_02831	-1.83281	2.79175	16.7116	4.35e-05	0.000170293
L2-7_01302	atpE_2	-1.82896	4.12499	31.8571	1.66e-08	1.17e-07
L2-7_00635	L2-7_00635	-1.82226	4.94994	52.0753	5.34e-13	7.03e-12
L2-7_03048	L2-7_03048	-1.81301	1.3467	27.9565	1.24e-07	7.74e-07
L2-7_02326	ywqN_2	-1.80676	5.90727	20.0233	7.65e-06	3.5e-05
L2-7_00825	tcyA	-1.80212	6.40615	24.8025	6.35e-07	3.52e-06
L2-7_01954	hisF	-1.79203	5.10315	46.6054	8.68e-12	1.01e-10
L2-7_01708	L2-7_01708	-1.79125	7.4454	42.1675	8.38e-11	8.54e-10
L2-7_02455	L2-7_02455	-1.78392	0.114293	12.1042	0.000503094	0.0015663
L2-7_01831	dnaJ_1	-1.76605	8.85855	13.9654	0.000186205	0.00064894
L2-7_02189	yhdG	-1.75725	1.63806	37.6703	8.38e-10	7.24e-09
L2-7_00077	L2-7_00077	-1.74774	1.50047	4.0631	0.04383	0.0784739
L2-7_01643	iap_1	-1.73176	2.47118	26.1276	3.2e-07	1.88e-06
L2-7_00703	fbpA	-1.72454	2.81705	30.623	3.13e-08	2.12e-07
L2-7_02790	gcdB	-1.71562	10.4246	49.042	2.51e-12	3.13e-11
L2-7_02754	L2-7_02754	-1.71446	4.68755	71.4027	2.91e-17	5.13e-16
L2-7_00068	L2-7_00068	-1.71039	0.552789	8.04322	0.00456742	0.0109011
L2-7_02920	L2-7_02920	-1.70632	5.23795	40.1676	2.33e-10	2.23e-09
L2-7_01186	L2-7_01186	-1.70488	1.55006	28.6424	8.71e-08	5.56e-07
L2-7_02191	argD_2	-1.69603	2.81479	27.2789	1.76e-07	1.06e-06
L2-7_01934	sfp_2	-1.69496	2.94012	31.8419	1.67e-08	1.18e-07
L2-7_00074	L2-7_00074	-1.68829	2.45207	3.81644	0.0507519	0.0889348
L2-7_01473	mdeA_2	-1.6757	3.33338	20.2822	6.68e-06	3.09e-05
L2-7_02782	porA	-1.66751	3.63253	44.4832	2.57e-11	2.83e-10
L2-7_00716	L2-7_00716	-1.66718	1.10325	27.4829	1.58e-07	9.68e-07
L2-7_01931	L2-7_01931	-1.66209	4.21478	16.2605	5.52e-05	0.000210735
L2-7_02737	L2-7_02737	-1.65242	5.32073	57.6904	3.07e-14	4.5e-13
L2-7_00049	L2-7_00049	-1.64873	2.96003	16.9269	3.88e-05	0.000155723
L2-7_00104	L2-7_00104	-1.64586	5.76283	14.6771	0.000127586	0.000457742
L2-7_00345	aspS_1	-1.62209	8.38069	44.1388	3.06e-11	3.3e-10
L2-7_00070	L2-7_00070	-1.61588	2.35308	4.90081	0.026844	0.0510985
L2-7_00334	deoR_1	-1.60897	5.11064	52.5461	4.2e-13	5.63e-12
L2-7_02747	L2-7_02747	-1.60417	2.18731	28.3257	1.03e-07	6.48e-07
L2-7_00610	L2-7_00610	-1.59982	2.16649	16.5829	4.66e-05	0.000180725
L2-7_01219	L2-7_01219	-1.59532	1.99852	25.6844	4.02e-07	2.3e-06
L2-7_01682	L2-7_01682	-1.58517	3.2942	28.111	1.15e-07	7.16e-07
L2-7_00067	L2-7_00067	-1.56414	3.5491	8.11188	0.00439761	0.0105407
L2-7_02728	L2-7_02728	-1.56349	3.1475	22.5642	2.03e-06	1.04e-05
L2-7_02950	L2-7_02950	-1.55786	1.30206	20.4935	5.98e-06	2.8e-05
L2-7_00565	serS	-1.55018	8.7137	65.5858	5.56e-16	9.17e-15
L2-7_00561	L2-7_00561	-1.54959	3.15763	18.7147	1.52e-05	6.55e-05
L2-7_01505	L2-7_01505	-1.54932	5.05027	18.7561	1.49e-05	6.45e-05
L2-7_02450	cshA	-1.54857	6.63902	33.4306	7.39e-09	5.55e-08
L2-7_01599	L2-7_01599	-1.5436	3.62077	42.8159	6.01e-11	6.29e-10
L2-7_02057	L2-7_02057	-1.53248	3.85445	21.7446	3.11e-06	1.56e-05
L2-7_01179	glf	-1.53016	5.47536	25.0642	5.55e-07	3.09e-06
L2-7_00072	L2-7_00072	-1.52754	4.82232	4.56669	0.0325996	0.0608382
L2-7_02449	tvaI	-1.52674	7.4869	29.1095	6.84e-08	4.44e-07
L2-7_01987	L2-7_01987	-1.52389	3.39702	18.3159	1.87e-05	7.89e-05
L2-7_02949	L2-7_02949	-1.52113	-0.353392	9.91758	0.00163708	0.00441175
L2-7_01691	pyk	-1.51392	10.8821	58.875	1.68e-14	2.54e-13
L2-7_02854	L2-7_02854	-1.50955	-0.268084	7.57796	0.00590863	0.0136826
L2-7_00071	L2-7_00071	-1.50662	2.54378	4.26354	0.0389386	0.071218
L2-7_00571	L2-7_00571	-1.4994	8.56997	14.6942	0.000126438	0.000454786
L2-7_00048	L2-7_00048	-1.49407	2.08523	10.0713	0.00150597	0.00410082
L2-7_00842	L2-7_00842	-1.48858	4.46781	24.0463	9.4e-07	5.08e-06
L2-7_01645	L2-7_01645	-1.48563	-0.0100977	8.37241	0.00380961	0.00924201
L2-7_00983	L2-7_00983	-1.48036	6.75472	61.3896	4.68e-15	7.17e-14
L2-7_01036	zupT_1	-1.4797	1.31067	23.2196	1.45e-06	7.6e-06
L2-7_02533	L2-7_02533	-1.46384	4.87189	71.876	2.29e-17	4.06e-16
L2-7_02755	L2-7_02755	-1.4629	9.02113	29.7848	4.83e-08	3.19e-07
L2-7_02061	pdxT	-1.45898	5.73909	4.49103	0.0340732	0.0633952
L2-7_00470	L2-7_00470	-1.44479	3.47187	8.52752	0.00349816	0.00858306
L2-7_01421	hcp_1	-1.44467	3.53458	35.076	3.17e-09	2.55e-08
L2-7_01409	L2-7_01409	-1.43749	0.274457	8.41684	0.0037176	0.0090423
L2-7_01037	ppk_2	-1.43259	5.71542	84.2453	4.37e-20	9.35e-19
L2-7_02791	L2-7_02791	-1.4319	11.0135	40.1687	2.33e-10	2.23e-09
L2-7_00247	L2-7_00247	-1.43158	4.69957	37.5708	8.82e-10	7.6e-09
L2-7_02073	copZ	-1.42775	2.11305	22.8377	1.76e-06	9.13e-06
L2-7_00607	mntP	-1.42495	1.28923	21.7253	3.15e-06	1.58e-05
L2-7_02852	L2-7_02852	-1.42324	4.79688	40.7334	1.74e-10	1.72e-09
L2-7_00756	acrA_2	-1.41979	13.1143	31.1555	2.38e-08	1.63e-07
L2-7_00945	fruA	-1.4173	6.85191	27.3998	1.65e-07	1.01e-06
L2-7_02788	L2-7_02788	-1.40383	8.12566	42.4248	7.35e-11	7.62e-10
L2-7_02916	gutB	-1.40067	0.193489	13.0554	0.000302418	0.000998086
L2-7_02696	icd	-1.40063	7.5494	12.3384	0.000443747	0.00140813
L2-7_00562	arlS_1	-1.40003	3.53451	22.1629	2.5e-06	1.28e-05
L2-7_02129	glgP_2	-1.39451	11.7415	56.9216	4.54e-14	6.52e-13
L2-7_00388	topA	-1.3876	8.27137	62.6421	2.48e-15	3.92e-14
L2-7_02020	L2-7_02020	-1.3833	1.35121	10.5889	0.00113768	0.00319098
L2-7_00779	glgP_1	-1.38168	2.07746	13.92	0.000190759	0.000660701
L2-7_02960	purC	-1.38017	9.62716	38.4767	5.54e-10	4.94e-09
L2-7_02447	L2-7_02447	-1.37927	3.52179	31.9411	1.59e-08	1.13e-07
L2-7_00327	nudC	-1.37559	4.67245	16.4411	5.02e-05	0.000192894
L2-7_01933	yicL	-1.37486	3.84323	40.3502	2.12e-10	2.06e-09
L2-7_01130	L2-7_01130	-1.37254	4.81171	23.6467	1.16e-06	6.2e-06
L2-7_03043	L2-7_03043	-1.36931	2.35045	15.9082	6.65e-05	0.000250911
L2-7_00322	L2-7_00322	-1.3656	1.78609	14.7344	0.000123765	0.000446892
L2-7_00633	L2-7_00633	-1.36307	3.15701	46.7352	8.13e-12	9.45e-11
L2-7_02789	gcdC	-1.36266	8.1454	35.8741	2.1e-09	1.71e-08
L2-7_01777	L2-7_01777	-1.36166	6.43912	48.4209	3.44e-12	4.21e-11
L2-7_01144	spoIVB	-1.35641	2.97734	33.9569	5.63e-09	4.33e-08
L2-7_00952	crh	-1.3557	7.05301	37.876	7.54e-10	6.56e-09
L2-7_02547	spoVAD	-1.35472	1.88959	21.6968	3.19e-06	1.59e-05
L2-7_00474	nrgA	-1.34978	3.06348	40.6654	1.81e-10	1.76e-09
L2-7_02332	purL	-1.34747	11.3641	34.8705	3.52e-09	2.8e-08
L2-7_01163	L2-7_01163	-1.34673	0.650719	15.6669	7.55e-05	0.000281443
L2-7_00759	agrA	-1.34309	3.40086	27.9359	1.25e-07	7.79e-07
L2-7_01803	L2-7_01803	-1.33319	3.2267	18.1833	2.01e-05	8.38e-05
L2-7_02622	clsA	-1.32726	2.96806	26.1473	3.16e-07	1.87e-06
L2-7_00972	cgkA_4	-1.3265	0.172813	12.2775	0.000458448	0.00144659
L2-7_00225	mepA_1	-1.31781	6.4229	34.9943	3.31e-09	2.64e-08
L2-7_02946	L2-7_02946	-1.3152	3.1778	35.2083	2.96e-09	2.39e-08
L2-7_03028	L2-7_03028	-1.31146	2.47826	15.1442	9.96e-05	0.000366743
L2-7_00850	gap	-1.30934	13.8655	50.7123	1.07e-12	1.37e-11
L2-7_02769	L2-7_02769	-1.30701	4.84579	25.6124	4.17e-07	2.38e-06
L2-7_03024	L2-7_03024	-1.30512	0.308978	3.34812	0.0672818	0.113637
L2-7_01359	gyrA_1	-1.3036	6.85698	62.6246	2.5e-15	3.94e-14
L2-7_01474	cysN	-1.30138	3.58098	12.9464	0.000320539	0.0010517
L2-7_03040	L2-7_03040	-1.29563	4.25229	19.9061	8.13e-06	3.7e-05
L2-7_02453	L2-7_02453	-1.2901	5.19687	20.5505	5.81e-06	2.73e-05
L2-7_02787	L2-7_02787	-1.2873	10.3604	35.8784	2.1e-09	1.71e-08
L2-7_01838	nagB	-1.28614	4.86948	28.6866	8.51e-08	5.45e-07
L2-7_01804	L2-7_01804	-1.28294	3.29721	18.9487	1.34e-05	5.89e-05
L2-7_01815	argC	-1.27921	6.16961	37.1967	1.07e-09	9.07e-09
L2-7_02542	yrbG_3	-1.27668	7.10493	12.8364	0.000339932	0.00111013
L2-7_02771	ldh_2	-1.27532	2.23321	28.9318	7.5e-08	4.83e-07
L2-7_02360	ssbB	-1.26909	0.802428	3.18031	0.0745304	0.123937
L2-7_01174	L2-7_01174	-1.26178	4.70948	19.8666	8.3e-06	3.76e-05
L2-7_01953	alsT_2	-1.25245	9.44925	7.52298	0.00609167	0.0140485
L2-7_00469	L2-7_00469	-1.25018	4.93161	8.63812	0.00329201	0.0081558
L2-7_01360	sigM	-1.24963	0.495617	8.32715	0.00390568	0.00945871
L2-7_01358	parE	-1.24531	6.44507	63.6401	1.49e-15	2.39e-14
L2-7_02814	yccX	-1.24431	6.26762	54.1214	1.88e-13	2.59e-12
L2-7_01227	L2-7_01227	-1.24337	5.15457	26.9756	2.06e-07	1.24e-06
L2-7_01778	L2-7_01778	-1.23806	6.11873	32.0698	1.49e-08	1.06e-07
L2-7_02355	cysE_2	-1.23335	1.82159	11.446	0.000716471	0.00213342
L2-7_00373	ytgP	-1.23064	6.11143	31.8061	1.7e-08	1.2e-07
L2-7_01936	tig_3	-1.2287	6.03959	48.2819	3.69e-12	4.5e-11
L2-7_01711	L2-7_01711	-1.22109	4.26426	38.0228	6.99e-10	6.1e-09
L2-7_00484	L2-7_00484	-1.22002	6.93411	15.1923	9.71e-05	0.000358456
L2-7_02353	L2-7_02353	-1.2141	2.0018	9.45597	0.00210463	0.00550622
L2-7_02128	ileS	-1.21205	10.4316	54.566	1.5e-13	2.09e-12
L2-7_01357	pspB	-1.20179	5.17314	53.7266	2.3e-13	3.12e-12
L2-7_01779	L2-7_01779	-1.20044	3.61609	18.4866	1.71e-05	7.31e-05
L2-7_01594	dmdA_2	-1.19728	9.14314	17.0024	3.73e-05	0.00015008
L2-7_00637	aroG	-1.19599	5.34918	7.41292	0.00647572	0.0148122
L2-7_02870	L2-7_02870	-1.19015	1.81167	20.2914	6.65e-06	3.08e-05
L2-7_02694	pyrB	-1.18858	7.21973	32.3767	1.27e-08	9.17e-08
L2-7_01004	L2-7_01004	-1.18439	5.18551	7.1974	0.00730094	0.0164393
L2-7_01394	L2-7_01394	-1.18376	6.55885	48.8898	2.71e-12	3.36e-11
L2-7_02086	L2-7_02086	-1.18262	8.06603	14.1111	0.000172321	0.000603554
L2-7_01870	pucK_2	-1.18246	2.85752	9.86813	0.00168166	0.00451775
L2-7_01038	L2-7_01038	-1.1818	5.21717	66.9727	2.75e-16	4.62e-15
L2-7_00715	L2-7_00715	-1.18032	4.10292	21.6815	3.22e-06	1.6e-05
L2-7_00693	tyrS	-1.17941	8.50457	32.7531	1.05e-08	7.72e-08
L2-7_00683	ilvE	-1.17645	8.66305	18.5481	1.66e-05	7.1e-05
L2-7_00657	L2-7_00657	-1.17395	3.42563	35.8524	2.13e-09	1.72e-08
L2-7_00335	tcdA	-1.17324	5.3419	39.5848	3.14e-10	2.93e-09
L2-7_01710	L2-7_01710	-1.17277	6.12258	28.9495	7.43e-08	4.8e-07
L2-7_02865	prfC	-1.16999	6.36411	35.457	2.61e-09	2.11e-08
L2-7_02359	L2-7_02359	-1.16567	0.315665	1.83594	0.175428	0.256684
L2-7_00103	L2-7_00103	-1.16432	5.64216	8.54511	0.00346452	0.00850796
L2-7_00363	fgs_1	-1.1615	4.94903	41.8513	9.85e-11	9.97e-10
L2-7_00942	flr_2	-1.15955	6.94458	55.0491	1.18e-13	1.66e-12
L2-7_02528	L2-7_02528	-1.15666	1.45681	10.0042	0.00156182	0.00422416
L2-7_01356	murF	-1.15466	6.07017	45.7957	1.31e-11	1.48e-10
L2-7_00643	gltX	-1.15231	8.8992	28.1768	1.11e-07	6.94e-07
L2-7_00106	L2-7_00106	-1.15028	2.55492	12.9725	0.000316094	0.00103833
L2-7_01215	gerBB	-1.15	1.69245	10.6344	0.00111004	0.00312596
L2-7_01022	ddpC	-1.14428	2.98046	5.68697	0.0170913	0.0346526
L2-7_02100	L2-7_02100	-1.14095	1.82161	11.3311	0.000762181	0.00225127
L2-7_00568	yidA	-1.1408	4.73335	26.2259	3.04e-07	1.8e-06
L2-7_01837	trpS2	-1.14019	8.59625	15.0488	0.000104767	0.000383735
L2-7_01760	nadB_2	-1.13866	3.07157	14.5796	0.000134361	0.000479593
L2-7_01596	ilvH_2	-1.1374	6.54635	20.612	5.62e-06	2.66e-05
L2-7_00758	L2-7_00758	-1.13632	3.54214	36.7399	1.35e-09	1.13e-08
L2-7_00573	dltC	-1.13129	5.4413	3.85566	0.0495786	0.0871513
L2-7_02770	ycdX	-1.13082	4.85561	16.9074	3.92e-05	0.000156882
L2-7_02033	ruvB	-1.12964	6.23127	45.1409	1.83e-11	2.05e-10
L2-7_01565	L2-7_01565	-1.12811	0.350255	7.23659	0.00714326	0.0161436
L2-7_00042	L2-7_00042	-1.12745	9.29742	10.794	0.00101829	0.00290556
L2-7_01816	argJ	-1.12265	6.60291	38.2663	6.17e-10	5.47e-09
L2-7_00829	aspC_1	-1.12114	6.67096	75.5692	3.53e-18	6.64e-17
L2-7_00405	potA_1	-1.11952	-0.289859	6.51913	0.010672	0.0228267
L2-7_00939	L2-7_00939	-1.11837	10.2651	24.3061	8.22e-07	4.49e-06
L2-7_02330	L2-7_02330	-1.1154	5.08264	43.0264	5.4e-11	5.7e-10
L2-7_02687	puuR_1	-1.11523	4.01549	16.1201	5.95e-05	0.000225718
L2-7_01175	L2-7_01175	-1.11017	5.09026	21.0326	4.52e-06	2.16e-05
L2-7_00717	L2-7_00717	-1.10984	5.13229	19.408	1.06e-05	4.73e-05
L2-7_02570	L2-7_02570	-1.10907	2.2745	16.6047	4.6e-05	0.000178908
L2-7_00614	L2-7_00614	-1.10867	1.13885	7.81395	0.00518445	0.0121869
L2-7_02845	L2-7_02845	-1.10341	3.10173	13.8635	0.000196576	0.000679169
L2-7_02914	L2-7_02914	-1.09865	2.47851	7.65885	0.00564945	0.0131422
L2-7_00567	trmB	-1.09818	4.23513	23.2824	1.4e-06	7.38e-06
L2-7_00570	yfnB	-1.0974	9.4996	9.15161	0.00248499	0.00639841
L2-7_00613	L2-7_00613	-1.09601	1.72659	5.4916	0.019108	0.0381072
L2-7_02930	L2-7_02930	-1.0938	6.00374	31.6231	1.87e-08	1.3e-07
L2-7_00292	L2-7_00292	-1.0929	1.00791	6.77437	0.00924762	0.0200711
L2-7_00329	L2-7_00329	-1.09257	5.86419	38.8272	4.63e-10	4.21e-09
L2-7_00651	L2-7_00651	-1.09089	3.54546	33.6369	6.64e-09	5.04e-08
L2-7_02633	L2-7_02633	-1.09053	0.418796	7.23725	0.00714064	0.0161436
L2-7_00569	L2-7_00569	-1.0892	5.64278	11.9722	0.000539994	0.00165906
L2-7_01023	nikB	-1.08824	3.99824	5.76535	0.0163452	0.0333086
L2-7_01630	leuA_1	-1.08214	8.62937	31.8148	1.7e-08	1.19e-07
L2-7_02736	metN	-1.08181	7.10675	24.1442	8.94e-07	4.84e-06
L2-7_02446	L2-7_02446	-1.08044	3.42439	14.1413	0.000169577	0.000594686
L2-7_02358	L2-7_02358	-1.0787	1.50597	2.27211	0.13172	0.200696
L2-7_00336	L2-7_00336	-1.07825	3.65553	16.5639	4.7e-05	0.000181789
L2-7_01802	L2-7_01802	-1.07756	4.25188	9.09528	0.00256269	0.00656969
L2-7_02571	L2-7_02571	-1.07586	4.93834	24.9455	5.9e-07	3.28e-06
L2-7_02065	L2-7_02065	-1.07354	3.38075	5.25217	0.0219194	0.0427406
L2-7_02803	L2-7_02803	-1.07268	-0.160812	5.26396	0.0217715	0.0425409
L2-7_02005	L2-7_02005	-1.07126	2.48872	7.84409	0.0050987	0.0120087
L2-7_01709	L2-7_01709	-1.07025	5.46643	16.6997	4.38e-05	0.00017112
L2-7_02548	L2-7_02548	-1.06801	1.70657	17.3243	3.15e-05	0.000128156
L2-7_00855	map_1	-1.06104	6.33566	35.9468	2.03e-09	1.66e-08
L2-7_01966	L2-7_01966	-1.05871	5.42901	4.80309	0.0284088	0.0537848
L2-7_02987	L2-7_02987	-1.05504	4.02404	12.8759	0.000332849	0.00108826
L2-7_03042	L2-7_03042	-1.05487	3.74457	17.7547	2.51e-05	0.000102942
L2-7_01528	L2-7_01528	-1.05055	1.63327	7.20925	0.00725287	0.0163496
L2-7_02777	alsT_4	-1.04843	3.36514	13.5098	0.000237324	0.00080022
L2-7_02901	L2-7_02901	-1.04705	6.84155	46.5492	8.93e-12	1.03e-10
L2-7_00757	L2-7_00757	-1.04483	3.02156	33.9387	5.69e-09	4.35e-08
L2-7_02972	nanE	-1.04248	4.22809	17.9845	2.23e-05	9.2e-05
L2-7_01817	argB	-1.04247	6.07803	27.6837	1.43e-07	8.78e-07
L2-7_02994	lhgO	-1.04172	10.5996	8.26841	0.00403409	0.00974441
L2-7_00584	cbiQ	-1.03944	6.49075	18.9479	1.34e-05	5.89e-05
L2-7_01595	ilvB_2	-1.03562	9.08211	16.21	5.67e-05	0.000215549
L2-7_00694	L2-7_00694	-1.03457	1.57842	13.5068	0.0002377	0.000800525
L2-7_02046	yhhX_1	-1.0339	4.90759	31.3852	2.12e-08	1.45e-07
L2-7_02296	ywiE_1	-1.03374	4.26483	21.3152	3.9e-06	1.88e-05
L2-7_00249	artQ	-1.03181	6.9796	22.8169	1.78e-06	9.21e-06
L2-7_01985	hcnB_3	-1.03157	10.3797	7.83129	0.00513494	0.0120807
L2-7_00608	L2-7_00608	-1.0306	2.27215	8.59671	0.00336771	0.00832128
L2-7_00755	acrB_2	-1.02526	12.6757	19.1954	1.18e-05	5.26e-05
L2-7_02529	yhhX_2	-1.02353	3.22024	9.15017	0.00248695	0.00639841
L2-7_03038	L2-7_03038	-1.0233	3.72071	12.042	0.000520157	0.00160516
L2-7_02849	L2-7_02849	-1.02185	2.52771	4.14316	0.0418031	0.0753748
L2-7_00803	cysG	-1.02085	6.17764	13.936	0.000189145	0.000657548
L2-7_02830	L2-7_02830	-1.01715	0.715619	6.90946	0.00857409	0.0188133
L2-7_00910	L2-7_00910	-1.01703	0.277287	5.69286	0.0170341	0.0345615
L2-7_02945	feoB_2	-1.01651	6.72776	30.2331	3.83e-08	2.55e-07
L2-7_02900	L2-7_02900	-1.01387	3.60093	24.1842	8.75e-07	4.76e-06
L2-7_02815	yhaM	-1.0076	6.49286	27.8504	1.31e-07	8.11e-07
L2-7_01504	L2-7_01504	-1.00007	4.59493	11.5839	0.000665245	0.00200002
L2-7_02819	L2-7_02819	-0.996084	0.497185	5.3252	0.0210192	0.0413885
L2-7_02569	L2-7_02569	-0.992629	5.61273	21.5388	3.47e-06	1.7e-05
L2-7_00019	yjcD	-0.991879	6.16922	26.1119	3.22e-07	1.89e-06
L2-7_01210	nifS_2	-0.987607	6.07523	18.7441	1.49e-05	6.48e-05
L2-7_01791	L2-7_01791	-0.986858	5.40189	13.6674	0.000218204	0.000743806
L2-7_00935	coaBC	-0.986298	9.52795	10.6348	0.00110977	0.00312596
L2-7_00585	ecfA3	-0.98354	6.05749	21.4349	3.66e-06	1.79e-05
L2-7_02807	L2-7_02807	-0.981733	5.49655	25.781	3.82e-07	2.2e-06
L2-7_01222	L2-7_01222	-0.979658	3.99363	27.9415	1.25e-07	7.79e-07
L2-7_01561	topB_2	-0.97834	4.67531	28.4083	9.82e-08	6.23e-07
L2-7_00653	ycfH_2	-0.977392	4.75854	35.0232	3.26e-09	2.61e-08
L2-7_02921	fieF	-0.971287	6.19906	31.6814	1.82e-08	1.26e-07
L2-7_01801	L2-7_01801	-0.967146	1.30849	7.069	0.00784291	0.0174411
L2-7_00475	nrgB	-0.965841	1.25514	13.7859	0.000204866	0.000704335
L2-7_01696	tqsA	-0.963669	4.82894	26.1957	3.09e-07	1.82e-06
L2-7_00280	ymdB_1	-0.96323	0.776822	7.8539	0.00507112	0.0119707
L2-7_01310	yccM_1	-0.962811	3.14695	14.6047	0.00013258	0.00047384
L2-7_02347	L2-7_02347	-0.961949	2.07779	9.04562	0.00263325	0.00672595
L2-7_00652	metG	-0.961605	9.00211	25.9443	3.51e-07	2.04e-06
L2-7_01092	sugC_2	-0.960601	6.47823	16.2629	5.51e-05	0.000210735
L2-7_00762	eccCa1	-0.958541	1.56156	11.911	0.000558047	0.00171078
L2-7_00228	L2-7_00228	-0.958149	2.88192	14.9985	0.000107595	0.000392552
L2-7_00356	ilvH_1	-0.958085	7.24718	53.9019	2.11e-13	2.87e-12
L2-7_02344	L2-7_02344	-0.954018	4.43252	34.1052	5.22e-09	4.06e-08
L2-7_02773	thiD_2	-0.952382	4.24558	17.8777	2.36e-05	9.68e-05
L2-7_01309	ravA	-0.951721	5.36901	7.41731	0.00645993	0.0147882
L2-7_00563	czcR	-0.945806	2.53539	10.5615	0.00115466	0.00323212
L2-7_02232	maf	-0.944439	5.17541	24.0319	9.48e-07	5.11e-06
L2-7_01576	ssuC_3	-0.942975	2.38888	8.44356	0.00366338	0.00891816
L2-7_02735	metI	-0.940471	6.68627	20.226	6.88e-06	3.18e-05
L2-7_00677	L2-7_00677	-0.939576	3.99754	7.31728	0.00682948	0.0155326
L2-7_00499	L2-7_00499	-0.937136	2.28061	10.8673	0.000978785	0.00280712
L2-7_02903	L2-7_02903	-0.937072	2.02312	1.76082	0.184522	0.266884
L2-7_02434	ttcA_2	-0.936931	4.77097	38.287	6.11e-10	5.43e-09
L2-7_00003	ygaZ_1	-0.93677	6.31549	33.756	6.25e-09	4.76e-08
L2-7_02899	L2-7_02899	-0.935813	3.2423	11.9472	0.000547296	0.00167965
L2-7_01548	tepA	-0.934889	1.89631	7.44297	0.00636846	0.0146146
L2-7_02837	L2-7_02837	-0.93454	5.02076	32.7717	1.04e-08	7.66e-08
L2-7_01819	L2-7_01819	-0.934169	2.91677	12.1242	0.000497704	0.00155297
L2-7_02605	L2-7_02605	-0.933556	3.73222	13.8103	0.000202225	0.000697825
L2-7_01780	rnhB	-0.932873	5.49475	18.1585	2.03e-05	8.48e-05
L2-7_00337	L2-7_00337	-0.931515	5.39376	20.6489	5.52e-06	2.62e-05
L2-7_02864	pflA	-0.929221	2.61229	2.42908	0.119103	0.184481
L2-7_02352	L2-7_02352	-0.926843	2.9682	11.071	0.000876868	0.00254346
L2-7_02369	L2-7_02369	-0.926445	1.22925	8.33971	0.00387878	0.00940169
L2-7_01314	rpoE	-0.925128	1.20838	7.00883	0.00811087	0.0179657
L2-7_00411	L2-7_00411	-0.923228	0.173026	6.02073	0.0141388	0.0293459
L2-7_02853	cph2_3	-0.920191	5.75915	25.429	4.59e-07	2.6e-06
L2-7_00448	L2-7_00448	-0.915923	3.20777	25.3343	4.82e-07	2.72e-06
L2-7_01124	smc_1	-0.915507	5.13115	7.68615	0.00556461	0.013
L2-7_01432	L2-7_01432	-0.914111	2.22486	8.84706	0.00293562	0.00736401
L2-7_01575	L2-7_01575	-0.909224	3.64677	21.6353	3.3e-06	1.63e-05
L2-7_01039	L2-7_01039	-0.905646	4.98616	18.7127	1.52e-05	6.55e-05
L2-7_02838	L2-7_02838	-0.902392	0.782272	3.92222	0.047652	0.0843468
L2-7_00689	ssuC_2	-0.899815	5.18004	34.2884	4.75e-09	3.73e-08
L2-7_02613	znuA	-0.897709	4.41085	17.9209	2.3e-05	9.47e-05
L2-7_01818	argD_1	-0.896342	6.7846	32.3264	1.3e-08	9.36e-08
L2-7_01005	aroA1	-0.894743	5.98652	5.03346	0.0248622	0.0476171
L2-7_01109	L2-7_01109	-0.891978	5.62681	38.0608	6.86e-10	6e-09
L2-7_00288	L2-7_00288	-0.891798	2.6853	13.6506	0.000220174	0.000749607
L2-7_02323	L2-7_02323	-0.890854	0.352053	3.39328	0.0654626	0.110899
L2-7_02331	L2-7_02331	-0.890851	5.63237	38.0948	6.74e-10	5.96e-09
L2-7_00830	gldA	-0.883778	7.15287	39.0302	4.17e-10	3.82e-09
L2-7_02637	L2-7_02637	-0.882665	1.15425	5.43091	0.0197833	0.0392862
L2-7_00754	acdA_2	-0.881373	13.4529	21.6754	3.23e-06	1.6e-05
L2-7_02550	yehU_4	-0.880443	1.79331	7.26384	0.00703566	0.0159498
L2-7_02247	ydfK	-0.877781	5.28584	10.2173	0.00139129	0.00381447
L2-7_01313	L2-7_01313	-0.877297	4.99803	19.1575	1.2e-05	5.35e-05
L2-7_00289	L2-7_00289	-0.877204	1.73257	7.67485	0.00559959	0.0130533
L2-7_02632	L2-7_02632	-0.876653	1.08164	4.82181	0.0281018	0.0532755
L2-7_02783	porB	-0.876282	4.60133	27.5437	1.54e-07	9.4e-07
L2-7_00596	L2-7_00596	-0.876231	5.76462	34.6427	3.96e-09	3.14e-08
L2-7_01006	L2-7_01006	-0.874506	5.22633	6.04936	0.0139113	0.028938
L2-7_00574	tycA	-0.874168	10.4823	2.75084	0.0972031	0.15537
L2-7_00944	glgB_2	-0.87321	7.92888	37.0724	1.14e-09	9.64e-09
L2-7_02609	L2-7_02609	-0.871297	6.65081	5.6102	0.0178563	0.0359693
L2-7_00943	L2-7_00943	-0.868204	6.97477	33.4913	7.16e-09	5.41e-08
L2-7_01401	L2-7_01401	-0.868161	6.47787	4.2732	0.0387179	0.0709532
L2-7_03078	L2-7_03078	-0.866322	3.65918	3.52482	0.0604565	0.103735
L2-7_02607	L2-7_02607	-0.866113	7.48559	6.26715	0.0122997	0.0259515
L2-7_02608	psd	-0.865463	6.89481	6.24771	0.0124354	0.0262183
L2-7_01201	xerD_1	-0.865127	4.53873	9.73799	0.00180498	0.00482131
L2-7_02712	prmC	-0.864478	6.58061	8.4551	0.00364022	0.00887719
L2-7_01600	L2-7_01600	-0.864397	2.74	12.7096	0.000363774	0.00117837
L2-7_02032	ruvA	-0.863905	5.0547	17.3013	3.19e-05	0.00012953
L2-7_02099	dinB_5	-0.860983	4.16799	21.3504	3.83e-06	1.85e-05
L2-7_01191	hcnC	-0.860845	1.29724	8.90177	0.00284894	0.00719813
L2-7_02673	L2-7_02673	-0.860685	5.73344	12.2876	0.000455971	0.00144039
L2-7_01431	L2-7_01431	-0.860212	2.13765	11.4721	0.000706478	0.0021059
L2-7_00688	L2-7_00688	-0.854589	3.57182	18.6754	1.55e-05	6.67e-05
L2-7_01315	L2-7_01315	-0.852773	2.61298	11.616	0.000653874	0.00197218
L2-7_01606	rpfC_3	-0.851068	5.63092	25.5071	4.41e-07	2.51e-06
L2-7_02674	L2-7_02674	-0.850226	4.19198	8.51815	0.00351622	0.00860031
L2-7_02953	L2-7_02953	-0.84875	0.999042	4.76073	0.0291163	0.0549756
L2-7_01772	L2-7_01772	-0.847978	6.94695	20.5515	5.8e-06	2.73e-05
L2-7_02973	ybbH_2	-0.84746	3.79274	15.221	9.56e-05	0.000353527
L2-7_02354	L2-7_02354	-0.845532	3.74222	12.4323	0.000421964	0.00134971
L2-7_01120	L2-7_01120	-0.844222	7.98798	24.9434	5.9e-07	3.28e-06
L2-7_00286	L2-7_00286	-0.841819	3.82826	26.0412	3.34e-07	1.96e-06
L2-7_01284	yfcE	-0.840924	4.52914	10.6436	0.0011045	0.00311662
L2-7_01189	hcnB_1	-0.83613	-0.134563	3.95399	0.0467603	0.0830307
L2-7_02604	basR	-0.834834	8.45797	14.6889	0.000126792	0.000455477
L2-7_01986	L2-7_01986	-0.827112	9.48406	5.03543	0.0248339	0.0475954
L2-7_02096	pgsA_2	-0.826866	0.374259	5.46514	0.0193995	0.038606
L2-7_01307	L2-7_01307	-0.820961	5.64313	5.30575	0.0212551	0.0417943
L2-7_01368	yvdT	-0.818637	5.02979	3.40995	0.0648043	0.110049
L2-7_01948	hgdC_1	-0.816769	8.75732	16.7123	4.35e-05	0.000170293
L2-7_00669	ssuB	-0.814539	0.314292	4.14861	0.0416687	0.0752292
L2-7_00224	mscS	-0.814263	6.07291	18.7125	1.52e-05	6.55e-05
L2-7_02035	yhbU_2	-0.813181	7.16487	32.4628	1.21e-08	8.8e-08
L2-7_00325	L2-7_00325	-0.811137	1.06944	2.32714	0.127136	0.19477
L2-7_02198	pilT	-0.807787	5.88241	16.4784	4.92e-05	0.000189918
L2-7_00170	copY	-0.806241	5.45646	11.392	0.000737609	0.00218476
L2-7_00326	L2-7_00326	-0.806189	3.45343	2.73953	0.0978936	0.156295
L2-7_00990	L2-7_00990	-0.804777	1.45835	6.52371	0.0106446	0.0227854
L2-7_02785	L2-7_02785	-0.803425	6.69569	19.1718	1.19e-05	5.32e-05
L2-7_02452	L2-7_02452	-0.802158	10.8307	18.1256	2.07e-05	8.58e-05
L2-7_00064	L2-7_00064	-0.801809	0.395055	1.2464	0.264242	0.360822
L2-7_02404	ftsW_3	-0.799512	7.3575	39.6057	3.11e-10	2.92e-09
L2-7_01011	eamA	-0.799197	5.04383	25.3612	4.75e-07	2.69e-06
L2-7_02402	mraY	-0.796861	6.46483	18.771	1.47e-05	6.41e-05
L2-7_03002	L2-7_03002	-0.795934	4.61441	8.58126	0.0033964	0.00837003
L2-7_01046	rny	-0.794752	11.8592	12.531	0.000400256	0.00129058
L2-7_01195	L2-7_01195	-0.792974	6.26102	14.6212	0.000131425	0.000470308
L2-7_03058	L2-7_03058	-0.791507	15.8205	0.507074	0.476408	0.570956
L2-7_02180	dnaC_2	-0.79145	8.33415	19.131	1.22e-05	5.41e-05
L2-7_01129	L2-7_01129	-0.790905	4.42267	5.12753	0.0235492	0.0454129
L2-7_02172	typA	-0.790715	8.77657	14.5168	0.000138917	0.000493965
L2-7_01597	L2-7_01597	-0.789648	3.36076	22.9205	1.69e-06	8.76e-06
L2-7_00236	bmrR	-0.788946	4.7899	10.5382	0.00116933	0.00326342
L2-7_02445	bcrC	-0.788488	1.98636	7.49567	0.00618474	0.0142513
L2-7_00597	L2-7_00597	-0.7875	4.89787	21.4115	3.71e-06	1.81e-05
L2-7_00022	L2-7_00022	-0.78555	7.33887	8.94708	0.00277913	0.00706635
L2-7_00714	sigX	-0.785406	1.6158	5.55169	0.0184629	0.0370846
L2-7_01529	L2-7_01529	-0.783066	4.41955	13.2212	0.000276804	0.000918962
L2-7_02194	pucR	-0.779661	5.55246	19.2502	1.15e-05	5.12e-05
L2-7_00609	serC	-0.778786	8.91714	4.58143	0.0323202	0.0603742
L2-7_02405	divIB	-0.772102	6.26174	19.0544	1.27e-05	5.59e-05
L2-7_00670	ssuC_1	-0.770939	0.385916	3.29271	0.069588	0.116828
L2-7_02328	L2-7_02328	-0.768654	5.7677	18.0094	2.2e-05	9.1e-05
L2-7_00907	L2-7_00907	-0.765219	3.00459	9.86348	0.00168592	0.00452485
L2-7_01243	L2-7_01243	-0.763222	7.4274	21.3854	3.76e-06	1.83e-05
L2-7_01071	L2-7_01071	-0.762831	8.3931	21.0408	4.5e-06	2.15e-05
L2-7_01214	L2-7_01214	-0.759872	0.125569	3.03491	0.0814911	0.132973
L2-7_00415	pucK_1	-0.759376	9.05649	16.884	3.97e-05	0.000158377
L2-7_02037	pbpA_2	-0.758651	6.08974	28.2821	1.05e-07	6.59e-07
L2-7_02329	luxS	-0.757332	6.73838	16.8781	3.99e-05	0.000158641
L2-7_01964	L2-7_01964	-0.757086	5.77357	14.8432	0.000116827	0.000424524
L2-7_02804	ybhF_4	-0.754343	0.65993	5.35171	0.0207019	0.0408211
L2-7_02379	hflX	-0.753109	5.20291	8.14176	0.00432572	0.0103951
L2-7_00221	ilvB_1	-0.749404	9.91951	13.271	0.000269542	0.000895916
L2-7_02713	L2-7_02713	-0.747124	6.02381	5.9301	0.0148844	0.0306662
L2-7_00636	clpB_1	-0.745297	5.553	20.156	7.14e-06	3.29e-05
L2-7_01784	sipT	-0.742564	5.75078	9.69268	0.00185004	0.00491821
L2-7_01395	glgA_2	-0.740027	7.36015	34.17	5.05e-09	3.94e-08
L2-7_02034	zapA	-0.738596	4.4754	13.7133	0.000212942	0.00072764
L2-7_00513	L2-7_00513	-0.738544	4.00632	17.2286	3.31e-05	0.000134384
L2-7_02693	pyrI	-0.73631	5.66731	8.63585	0.00329612	0.00815876
L2-7_02544	L2-7_02544	-0.734585	4.11954	22.9627	1.65e-06	8.6e-06
L2-7_02300	L2-7_02300	-0.734191	3.55682	4.06938	0.0436674	0.0782327
L2-7_00605	L2-7_00605	-0.733708	3.01866	16.3621	5.23e-05	0.000200557
L2-7_02499	L2-7_02499	-0.731412	0.260442	2.96526	0.0850706	0.137944
L2-7_00937	panC	-0.730122	9.11444	7.6581	0.00565179	0.0131422
L2-7_02650	cas5_2	-0.729176	0.950788	3.12292	0.0771981	0.127401
L2-7_01316	L2-7_01316	-0.728598	4.50688	6.72576	0.00950303	0.0205527
L2-7_00849	hisK_2	-0.727508	5.66548	18.8601	1.41e-05	6.14e-05
L2-7_00248	artP	-0.727346	9.53764	14.5241	0.000138381	0.000492684
L2-7_00566	dacB	-0.725268	7.50076	8.02283	0.00461915	0.0110152
L2-7_02839	L2-7_02839	-0.717264	5.7641	18.1405	2.05e-05	8.53e-05
L2-7_00718	L2-7_00718	-0.715802	6.15608	22.7444	1.85e-06	9.55e-06
L2-7_00169	L2-7_00169	-0.713172	4.78053	12.3403	0.000443287	0.00140813
L2-7_00938	panB	-0.712262	9.18117	9.72401	0.00181876	0.00484888
L2-7_02929	L2-7_02929	-0.712196	5.43261	20.6483	5.52e-06	2.62e-05
L2-7_01211	nifU	-0.711742	4.39593	7.85005	0.00508193	0.0119862
L2-7_00748	L2-7_00748	-0.710621	4.06905	5.6708	0.0172496	0.034923
L2-7_01192	bdhA	-0.707755	1.3742	6.92732	0.00848886	0.0186995
L2-7_00471	L2-7_00471	-0.707011	4.43152	5.51003	0.0189077	0.0377615
L2-7_00057	sigA_1	-0.706776	7.6727	4.86959	0.0273339	0.0519252
L2-7_00595	L2-7_00595	-0.705446	6.43548	29.5972	5.32e-08	3.5e-07
L2-7_02936	L2-7_02936	-0.705047	2.55539	5.26796	0.0217215	0.0424728
L2-7_02812	L2-7_02812	-0.701769	5.28361	20.292	6.65e-06	3.08e-05
L2-7_00487	tagB_1	-0.699313	7.55032	21.7839	3.05e-06	1.54e-05
L2-7_02931	L2-7_02931	-0.699309	5.41857	14.7916	0.000120069	0.000434668
L2-7_00765	L2-7_00765	-0.696347	2.66485	8.8981	0.00285468	0.00720613
L2-7_00409	nfdA	-0.69499	0.283393	3.84672	0.0498433	0.0875617
L2-7_02732	ltaS1_2	-0.693294	6.05171	12.5015	0.000406616	0.00130808
L2-7_02857	L2-7_02857	-0.691608	2.29671	7.5414	0.00602972	0.01394
L2-7_02765	L2-7_02765	-0.690643	3.52292	16.7997	4.15e-05	0.000164635
L2-7_00611	L2-7_00611	-0.685656	0.809539	3.96548	0.0464422	0.0825705
L2-7_00011	L2-7_00011	-0.684705	5.55704	26.3708	2.82e-07	1.67e-06
L2-7_02772	L2-7_02772	-0.684055	4.27774	10.8079	0.00101069	0.00289271
L2-7_02036	ftsW_2	-0.681808	5.69622	18.5796	1.63e-05	7e-05
L2-7_00018	uppP	-0.678292	6.07688	21.8994	2.87e-06	1.46e-05
L2-7_02481	birA	-0.67746	6.65078	21.6225	3.32e-06	1.64e-05
L2-7_00133	L2-7_00133	-0.672819	0.565852	2.20636	0.137442	0.208282
L2-7_03011	L2-7_03011	-0.671428	0.949514	1.3564	0.244162	0.337514
L2-7_02019	ltaS_2	-0.669671	6.44015	21.7915	3.04e-06	1.53e-05
L2-7_00936	panD	-0.669278	8.00987	6.07509	0.0137101	0.0285619
L2-7_00220	ilvD	-0.668621	9.98209	10.3259	0.00131178	0.00361771
L2-7_01687	L2-7_01687	-0.668559	3.51566	14.4703	0.000142385	0.000504378
L2-7_00012	L2-7_00012	-0.667656	5.426	20.3749	6.37e-06	2.97e-05
L2-7_02801	L2-7_02801	-0.666174	1.8763	3.56122	0.0591444	0.101733
L2-7_02407	L2-7_02407	-0.665	-0.250783	2.06057	0.151154	0.225885
L2-7_02563	fgs_2	-0.664005	7.61149	17.0739	3.6e-05	0.000144951
L2-7_01785	rplS	-0.663293	9.30948	7.11703	0.00763553	0.017034
L2-7_01899	wcaJ	-0.662318	7.30314	26.4979	2.64e-07	1.57e-06
L2-7_00166	gph_1	-0.661806	5.05908	22.9725	1.64e-06	8.57e-06
L2-7_01456	L2-7_01456	-0.661592	3.72688	3.93587	0.0472668	0.0838319
L2-7_02938	L2-7_02938	-0.660285	11.0526	12.3193	0.000448301	0.00141937
L2-7_02312	L2-7_02312	-0.659717	3.86469	14.1891	0.000165323	0.000581954
L2-7_00287	L2-7_00287	-0.65673	2.09977	6.58502	0.010284	0.022098
L2-7_02101	L2-7_02101	-0.656229	0.863294	2.64956	0.103579	0.163785
L2-7_00163	L2-7_00163	-0.656064	6.79505	25.2386	5.07e-07	2.84e-06
L2-7_01472	asrC	-0.654853	5.0185	14.7187	0.000124802	0.000450059
L2-7_02714	L2-7_02714	-0.653695	2.50161	3.65469	0.0559115	0.0970657
L2-7_00966	fbpC	-0.653332	5.67251	8.47781	0.00359504	0.00877465
L2-7_02774	L2-7_02774	-0.652308	2.26629	4.74223	0.0294309	0.0554203
L2-7_01194	aguA	-0.651649	0.798732	4.18547	0.040772	0.0741235
L2-7_02336	L2-7_02336	-0.650443	4.71896	17.0331	3.67e-05	0.000147889
L2-7_02233	cfa	-0.650181	3.41425	8.00027	0.00467703	0.0111437
L2-7_00851	pgk	-0.650091	11.6372	6.78899	0.0091722	0.0199383
L2-7_02624	L2-7_02624	-0.64976	3.3654	4.40054	0.0359276	0.0664922
L2-7_02001	truA_1	-0.644947	5.727	19.5924	9.58e-06	4.32e-05
L2-7_01650	L2-7_01650	-0.644854	2.77961	6.162	0.0130523	0.0273952
L2-7_01783	rbgA	-0.643911	6.28646	9.00411	0.00269374	0.00686792
L2-7_02836	L2-7_02836	-0.642236	5.59105	13.5806	0.00022853	0.000775232
L2-7_00729	L2-7_00729	-0.641626	6.76975	2.37466	0.123318	0.19017
L2-7_00355	msrR	-0.641338	7.84244	14.25	0.000160059	0.000564842
L2-7_00991	L2-7_00991	-0.639596	0.25272	1.65109	0.198811	0.284218
L2-7_02295	L2-7_02295	-0.632416	6.23007	4.56603	0.032612	0.0608382
L2-7_01193	L2-7_01193	-0.631755	0.580436	4.25821	0.0390611	0.0712731
L2-7_01761	nadC	-0.629439	2.84483	4.34669	0.0370809	0.0682658
L2-7_03020	L2-7_03020	-0.628062	6.87878	10.9017	0.000960742	0.0027582
L2-7_01143	gmr_2	-0.62601	6.63239	11.4098	0.000730587	0.00216854
L2-7_02435	pduB_3	-0.625678	6.55598	2.32975	0.126923	0.19455
L2-7_01825	L2-7_01825	-0.622686	5.8718	14.4878	0.000141074	0.000500365
L2-7_03039	L2-7_03039	-0.62206	2.85804	5.137	0.0234211	0.0452593
L2-7_02199	L2-7_02199	-0.621877	3.90227	8.59348	0.00337368	0.00832298
L2-7_00802	cobQ	-0.621119	6.99487	11.1741	0.000829484	0.00242358
L2-7_02342	L2-7_02342	-0.620563	0.600941	3.19066	0.0740599	0.123301
L2-7_00219	leuB	-0.619941	8.75789	8.50651	0.00353877	0.00864485
L2-7_00967	modB	-0.618086	3.30597	10.6304	0.00111243	0.00312955
L2-7_00771	yfhQ	-0.617475	5.76309	21.7063	3.18e-06	1.59e-05
L2-7_02816	rlmCD_3	-0.616584	6.73251	19.1003	1.24e-05	5.48e-05
L2-7_00805	hemB	-0.614968	7.91431	16.5773	4.67e-05	0.000181014
L2-7_00518	L2-7_00518	-0.614775	2.84535	8.06725	0.00450725	0.0107759
L2-7_01055	desVI	-0.614754	4.41936	10.5053	0.0011903	0.00330876
L2-7_01961	L2-7_01961	-0.609504	2.83601	3.25691	0.0711231	0.119119
L2-7_02829	L2-7_02829	-0.606736	3.8646	11.368	0.000747197	0.00221082
L2-7_00862	eno_1	-0.606213	3.8556	1.9225	0.165582	0.244318
L2-7_01125	L2-7_01125	-0.604004	4.04877	3.66868	0.055444	0.0963735
L2-7_02918	L2-7_02918	-0.601594	4.88865	5.6487	0.0174683	0.0352893
L2-7_02746	L2-7_02746	-0.600928	2.23813	5.88923	0.0152338	0.0312611
L2-7_01349	L2-7_01349	-0.599532	5.01654	8.04526	0.0045623	0.0108982
L2-7_00392	tsf	-0.599189	9.92712	6.6651	0.00983191	0.0212242
L2-7_02549	uvrY	-0.598756	3.10106	7.18593	0.00734774	0.0165103
L2-7_01337	pbpB	-0.598618	6.25416	8.54621	0.00346242	0.00850796
L2-7_00476	fliU	-0.598255	4.8848	17.0748	3.59e-05	0.000144951
L2-7_01781	sipV_1	-0.597043	5.43118	7.78684	0.00526283	0.0123505
L2-7_01567	L2-7_01567	-0.596616	1.60436	4.75432	0.0292248	0.0551433
L2-7_02063	phoR_4	-0.594965	4.68512	6.61954	0.0100866	0.0217405
L2-7_01768	dapL_2	-0.594177	6.59957	9.84237	0.00170538	0.0045727
L2-7_00402	purE_2	-0.593888	7.4043	13.5672	0.000230176	0.00077987
L2-7_01898	htrB	-0.593822	7.94077	5.92351	0.0149402	0.0307585
L2-7_00749	L2-7_00749	-0.593313	3.77088	3.25361	0.0712662	0.119288
L2-7_01930	L2-7_01930	-0.589676	3.43188	13.0175	0.0003086	0.00101729
L2-7_02520	L2-7_02520	-0.587571	4.08412	3.63606	0.0565405	0.0979756
L2-7_00853	gpmI	-0.58749	10.6254	5.54696	0.0185128	0.0371316
L2-7_00544	L2-7_00544	-0.587488	7.15525	18.7323	1.5e-05	6.51e-05
L2-7_00330	L2-7_00330	-0.586372	5.57986	7.31899	0.00682298	0.0155305
L2-7_01962	lytG_2	-0.585207	7.62833	9.65643	0.00188689	0.00499724
L2-7_02686	potA_4	-0.585106	4.41015	7.12136	0.00761711	0.0170065
L2-7_01826	rpsT	-0.583906	8.09647	6.85932	0.00881801	0.019258
L2-7_00002	L2-7_00002	-0.582895	4.55685	15.0029	0.000107346	0.000392156
L2-7_02513	queA	-0.581945	8.95164	8.91846	0.00282303	0.00715726
L2-7_02932	yjiA	-0.581851	4.22396	12.4568	0.000416471	0.00133519
L2-7_00750	L2-7_00750	-0.581022	4.08546	5.26898	0.0217087	0.0424728
L2-7_00275	L2-7_00275	-0.580339	1.11789	3.89352	0.0484727	0.0856372
L2-7_02482	L2-7_02482	-0.579593	4.22814	5.76728	0.0163273	0.0332963
L2-7_03019	L2-7_03019	-0.578259	7.91029	11.6821	0.000631037	0.00190946
L2-7_01746	spoVT	-0.577688	5.45479	16.235	5.6e-05	0.000213014
L2-7_00999	lysC	-0.577004	7.98552	3.09092	0.0787302	0.129234
L2-7_00281	L2-7_00281	-0.575424	0.753875	3.19191	0.0740033	0.12328
L2-7_01732	L2-7_01732	-0.574523	6.59204	9.31144	0.00227728	0.00591923
L2-7_01775	plsY	-0.573926	6.75845	17.4448	2.96e-05	0.000120635
L2-7_00482	araB_1	-0.5737	2.8728	8.07749	0.00448184	0.0107243
L2-7_01105	L2-7_01105	-0.570597	7.56559	16.0678	6.11e-05	0.000231717
L2-7_00426	L2-7_00426	-0.570201	1.17362	3.12241	0.0772227	0.127401
L2-7_01681	L2-7_01681	-0.569106	5.24709	11.0575	0.000883307	0.00255684
L2-7_01070	L2-7_01070	-0.56908	7.88854	19.4161	1.05e-05	4.72e-05
L2-7_02514	pheT	-0.567916	9.2203	9.68133	0.0018615	0.00494268
L2-7_00517	L2-7_00517	-0.566713	3.52026	10.6565	0.00109684	0.00310125
L2-7_02862	deoC	-0.560838	2.34002	5.44433	0.019632	0.0390133
L2-7_02678	degA_2	-0.560643	4.00996	3.29282	0.0695835	0.116828
L2-7_02483	coaX	-0.559789	7.04019	12.2219	0.000472319	0.00148534
L2-7_00557	L2-7_00557	-0.559421	5.74273	6.74088	0.00942281	0.0204355
L2-7_02515	pheS	-0.55903	8.40345	11.7709	0.000601642	0.00183439
L2-7_01782	sipV_2	-0.558652	5.32449	5.86284	0.0154638	0.0316506
L2-7_02599	L2-7_02599	-0.558495	5.22903	2.99847	0.0833431	0.135457
L2-7_01230	L2-7_01230	-0.558488	1.11517	3.88891	0.0486059	0.0857642
L2-7_00712	L2-7_00712	-0.55818	3.82387	6.72517	0.00950615	0.0205527
L2-7_00692	L2-7_00692	-0.558091	4.47639	6.57576	0.0103377	0.0221963
L2-7_02710	hisC	-0.557872	7.74851	9.45729	0.00210312	0.00550622
L2-7_02484	dus_1	-0.553513	7.31206	11.0954	0.000865406	0.00252065
L2-7_02479	ltaS1_1	-0.552519	7.16187	5.65351	0.0174205	0.0352181
L2-7_00852	tpiA	-0.551857	10.8092	5.26236	0.0217915	0.0425504
L2-7_02875	L2-7_02875	-0.548516	5.35594	9.04229	0.00263806	0.00673209
L2-7_00616	L2-7_00616	-0.548397	4.16447	4.17644	0.0409897	0.0743385
L2-7_03076	L2-7_03076	-0.547051	4.52863	2.58983	0.107552	0.169304
L2-7_00365	sulD	-0.546295	5.53848	11.7619	0.00060457	0.00184075
L2-7_02204	L2-7_02204	-0.545339	4.3329	12.3107	0.00045038	0.00142434
L2-7_00412	thiG	-0.545127	2.9327	6.94543	0.00840338	0.0185404
L2-7_01415	L2-7_01415	-0.54423	0.160717	1.14184	0.285264	0.382262
L2-7_03032	L2-7_03032	-0.542283	3.8973	3.30582	0.0690347	0.116177
L2-7_02365	L2-7_02365	-0.541816	1.25356	3.03138	0.0816685	0.133121
L2-7_01471	L2-7_01471	-0.541586	2.55463	4.41191	0.0356889	0.0661815
L2-7_00698	rlmCD_1	-0.541398	6.43867	23.4648	1.27e-06	6.76e-06
L2-7_00854	L2-7_00854	-0.541051	4.48244	13.723	0.000211844	0.000724771
L2-7_01454	L2-7_01454	-0.540031	3.3589	1.74654	0.186313	0.26882
L2-7_02313	mepA_11	-0.539657	5.00227	7.05419	0.00790798	0.0175669
L2-7_00690	L2-7_00690	-0.538639	5.69028	8.68953	0.00320043	0.00795001
L2-7_01929	panF	-0.537879	6.65495	14.4947	0.000140557	0.000499166
L2-7_00997	infC	-0.536246	9.19637	7.24191	0.00712211	0.0161327
L2-7_02606	L2-7_02606	-0.535021	7.88057	3.16824	0.0750834	0.124783
L2-7_02935	L2-7_02935	-0.534467	5.90832	15.796	7.06e-05	0.000264284
L2-7_01239	L2-7_01239	-0.533552	4.97393	10.3815	0.00127285	0.00352076
L2-7_00864	mglA_1	-0.53229	7.05445	10.2206	0.00138878	0.00381133
L2-7_02397	tagH	-0.532164	6.27347	11.0841	0.000870731	0.0025309
L2-7_00446	L2-7_00446	-0.531928	2.03557	4.29056	0.0383245	0.0702783
L2-7_00535	cwlD	-0.530924	4.33216	3.20346	0.0734828	0.122559
L2-7_00606	pdaA	-0.529985	2.57229	7.37971	0.00659637	0.0150513
L2-7_02195	L2-7_02195	-0.529556	6.47616	13.4079	0.000250569	0.000837821
L2-7_02718	gltD_2	-0.528298	4.57874	12.0462	0.000518976	0.00160327
L2-7_03046	L2-7_03046	-0.527224	4.91101	3.54728	0.0596432	0.102465
L2-7_00912	L2-7_00912	-0.526849	3.87346	4.45073	0.0348864	0.0647363
L2-7_02443	L2-7_02443	-0.526802	8.2913	9.59132	0.00195499	0.00515809
L2-7_00621	tmk	-0.524952	5.56768	12.2512	0.000464964	0.0014655
L2-7_02711	prfA	-0.524661	7.33933	6.61964	0.010086	0.0217405
L2-7_01283	apbE	-0.523839	4.92357	5.1807	0.0228392	0.0442874
L2-7_02394	ccpA	-0.523837	5.22027	12.2032	0.00047708	0.00149695
L2-7_02537	ytrB	-0.523754	5.53359	0.441207	0.506541	0.600138
L2-7_00222	serA	-0.523641	8.96838	5.93726	0.014824	0.0305643
L2-7_02480	argF	-0.523437	7.4151	13.5379	0.000233796	0.000791179
L2-7_01903	L2-7_01903	-0.523213	5.92062	6.45388	0.0110711	0.0235365
L2-7_00394	L2-7_00394	-0.5231	0.45481	1.15253	0.28302	0.379618
L2-7_01965	L2-7_01965	-0.521619	6.73308	11.6059	0.00065744	0.00197868
L2-7_00764	prkC_1	-0.521005	0.0847619	1.57384	0.20965	0.297438
L2-7_00834	spoVB	-0.520667	6.78174	18.889	1.39e-05	6.06e-05
L2-7_02860	fsaA	-0.519855	5.71653	13.6906	0.000215527	0.000735574
L2-7_01176	lacA_2	-0.518908	5.3277	5.54282	0.0185566	0.0371929
L2-7_02817	yegE	-0.516711	6.22935	11.4327	0.00072161	0.00214644
L2-7_01321	L2-7_01321	-0.515649	4.96418	3.43225	0.0639348	0.108705
L2-7_00558	rpf2	-0.514909	5.59066	4.88605	0.0270746	0.0515024
L2-7_00503	mfd	-0.514354	7.82643	10.3208	0.00131539	0.0036241
L2-7_01963	mdeA_3	-0.511781	8.05868	5.36763	0.0205139	0.0405073
L2-7_02498	L2-7_02498	-0.510917	3.51118	6.73778	0.00943923	0.0204553
L2-7_02685	potB_3	-0.509517	4.44825	4.26077	0.0390022	0.0712413
L2-7_01974	L2-7_01974	-0.509354	6.0461	1.9297	0.164791	0.243322
L2-7_01753	spoIIE	-0.506493	5.26126	2.50378	0.113573	0.17719
L2-7_01145	recN	-0.505991	7.35353	15.8892	6.72e-05	0.000252935
L2-7_01209	cymR_1	-0.505642	4.96294	15.9687	6.44e-05	0.00024385
L2-7_00250	glnQ_1	-0.505138	7.64527	6.32604	0.0118978	0.0252175
L2-7_00165	sigK	-0.50383	5.98994	12.7114	0.000363432	0.00117837
L2-7_02196	ddlA	-0.503292	8.10115	8.59313	0.00337434	0.00832298
L2-7_02744	L2-7_02744	-0.502898	2.7038	3.60573	0.0575808	0.0993482
L2-7_02425	mepA_12	-0.499324	4.58826	11.6362	0.000646804	0.00195296
L2-7_00691	cysA_1	-0.498666	5.92301	9.89789	0.00165469	0.00445383
L2-7_01400	L2-7_01400	-0.498087	4.68086	4.52765	0.0333514	0.0621348
L2-7_00403	L2-7_00403	-0.49765	8.29909	7.14429	0.00752032	0.0168172
L2-7_00454	L2-7_00454	-0.497524	3.14554	3.89709	0.0483698	0.0855093
L2-7_01634	L2-7_01634	-0.497074	6.35352	5.28978	0.0214509	0.0421201
L2-7_02364	L2-7_02364	-0.495995	1.01898	2.86752	0.0903841	0.145383
L2-7_00699	L2-7_00699	-0.495894	4.88896	10.062	0.00151356	0.00411748
L2-7_02943	hflK	-0.494232	10.1256	5.24818	0.0219697	0.0428088
L2-7_02257	L2-7_02257	-0.494199	0.823749	1.30644	0.253039	0.348069
L2-7_00559	L2-7_00559	-0.492454	4.6169	0.662354	0.41573	0.512709
L2-7_01045	L2-7_01045	-0.492174	2.48146	3.72973	0.0534521	0.0932002
L2-7_01414	bvgS_1	-0.490823	4.42652	6.5266	0.0106273	0.0227658
L2-7_02536	L2-7_02536	-0.488412	6.71967	0.434658	0.509712	0.602876
L2-7_00010	L2-7_00010	-0.488139	8.15219	11.034	0.000894574	0.00258412
L2-7_02173	ssb_4	-0.484759	0.501043	1.54226	0.214281	0.302782
L2-7_01326	L2-7_01326	-0.483502	5.84027	3.60993	0.0574355	0.0991585
L2-7_02420	lon1_2	-0.482732	9.27358	8.16599	0.00426831	0.0102836
L2-7_01470	trxA_3	-0.482414	4.2255	7.15108	0.00749188	0.016795
L2-7_03029	L2-7_03029	-0.479938	0.262829	0.628271	0.42799	0.52589
L2-7_00730	L2-7_00730	-0.479703	7.24611	2.07846	0.14939	0.223607
L2-7_01308	L2-7_01308	-0.477785	5.45904	3.01189	0.0826558	0.134418
L2-7_00410	L2-7_00410	-0.477656	6.41319	5.98214	0.0144515	0.0299062
L2-7_03031	L2-7_03031	-0.474474	3.23605	2.34097	0.126011	0.193365
L2-7_00831	flr_1	-0.474025	4.91365	7.6096	0.00580584	0.0134669
L2-7_00164	yhbU_1	-0.473775	6.93619	13.1589	0.000286162	0.000947784
L2-7_01978	glnQ_2	-0.472841	10.7209	6.39446	0.0114477	0.0243003
L2-7_01111	priA	-0.472792	7.65228	13.1141	0.000293088	0.000969397
L2-7_00488	L2-7_00488	-0.472444	8.311	10.3408	0.00130119	0.00359558
L2-7_01241	epsH_2	-0.471804	4.2886	4.18465	0.0407917	0.0741235
L2-7_01106	L2-7_01106	-0.470165	5.88606	11.552	0.000676755	0.00202593
L2-7_02421	ddh	-0.46952	8.17301	8.88877	0.0028693	0.0072207
L2-7_02589	mta_2	-0.469358	4.78533	7.08014	0.00779427	0.0173605
L2-7_00713	L2-7_00713	-0.468207	4.02102	8.57246	0.00341287	0.00840321
L2-7_01012	sbcD	-0.468019	5.86131	9.30558	0.00228458	0.00593269
L2-7_01731	paaK	-0.466706	5.36179	5.98964	0.0143902	0.0298014
L2-7_00450	L2-7_00450	-0.46599	4.2947	10.6051	0.00112777	0.00316635
L2-7_01240	L2-7_01240	-0.465239	6.78817	9.66387	0.00187927	0.00498176
L2-7_00832	L2-7_00832	-0.46495	6.02086	14.153	0.000168531	0.00059176
L2-7_01107	gmk	-0.45988	7.36581	12.3644	0.000437594	0.00139334
L2-7_00366	pheA	-0.459854	5.74497	8.90196	0.00284865	0.00719813
L2-7_01869	L2-7_01869	-0.458789	4.16039	3.6224	0.0570064	0.0985608
L2-7_01605	pleD	-0.458274	3.79124	5.00513	0.0252723	0.0483695
L2-7_00445	L2-7_00445	-0.458107	1.43609	2.20515	0.137551	0.20833
L2-7_02320	mdeA_4	-0.458077	5.8326	4.1206	0.042364	0.0762879
L2-7_02064	regX3	-0.457575	2.81706	3.2395	0.0718828	0.120176
L2-7_00005	purN	-0.45744	8.85406	6.58611	0.0102777	0.022098
L2-7_00723	yxlF_1	-0.457296	4.92352	6.51044	0.0107243	0.0228862
L2-7_02431	L2-7_02431	-0.456136	5.38764	7.32793	0.00678911	0.0154774
L2-7_01018	tagB_2	-0.455791	5.5341	4.0418	0.0443866	0.0794196
L2-7_02403	murD	-0.453962	7.1959	8.655	0.00326166	0.00808776
L2-7_02522	folE	-0.453114	5.85258	2.39349	0.121841	0.188098
L2-7_01840	L2-7_01840	-0.452795	3.91646	7.92936	0.00486389	0.0115595
L2-7_00140	hpdB	-0.451733	3.18456	4.29396	0.0382481	0.070203
L2-7_02251	L2-7_02251	-0.450533	5.99144	10.7649	0.00103442	0.00293977
L2-7_02396	tagG	-0.449548	6.12718	6.09735	0.0135385	0.0282463
L2-7_00617	L2-7_00617	-0.449231	3.48507	3.04318	0.0810771	0.132388
L2-7_00465	L2-7_00465	-0.447118	1.35448	2.2562	0.13308	0.202548
L2-7_03041	L2-7_03041	-0.446282	4.74043	3.51105	0.060961	0.104473
L2-7_01013	sbcC	-0.443779	6.92814	8.13483	0.0043423	0.0104182
L2-7_02521	queE	-0.442728	5.59315	2.39145	0.122001	0.188241
L2-7_00556	patA_1	-0.441513	6.15564	5.76013	0.0163939	0.0333835
L2-7_00960	rpe	-0.441294	7.73731	13.4273	0.000247983	0.000830166
L2-7_00043	mdeA_1	-0.44124	6.44533	9.60127	0.00194443	0.00513504
L2-7_02478	soxS_2	-0.439516	5.81596	7.44319	0.0063677	0.0146146
L2-7_00904	L2-7_00904	-0.438785	2.87134	3.12461	0.0771182	0.127401
L2-7_02680	L2-7_02680	-0.43677	3.56387	6.28075	0.0122056	0.025792
L2-7_01513	dapF	-0.436512	7.77442	5.51201	0.0188864	0.0377458
L2-7_00453	L2-7_00453	-0.436448	0.888341	1.67012	0.196242	0.28112
L2-7_00719	tnpR_1	-0.435394	6.22963	10.1004	0.00148239	0.00404051
L2-7_00367	ltaS_1	-0.434677	7.08994	8.96355	0.0027542	0.00700932
L2-7_02200	L2-7_02200	-0.433838	4.16664	3.40322	0.0650694	0.110366
L2-7_01467	mec	-0.43333	5.38467	7.68523	0.00556747	0.013
L2-7_02428	L2-7_02428	-0.433156	4.62916	6.91005	0.00857127	0.0188133
L2-7_00223	asd2	-0.431643	9.21296	2.4649	0.116415	0.181119
L2-7_02764	ygaZ_2	-0.430527	3.74066	7.04295	0.00795777	0.0176545
L2-7_02684	ydcV_3	-0.427586	4.96835	3.90583	0.0481187	0.0851191
L2-7_01776	der	-0.427345	7.40922	10.9559	0.000933056	0.00268697
L2-7_00706	mobA_1	-0.42726	0.392599	1.19884	0.273554	0.370512
L2-7_00785	recQ	-0.426634	5.75901	7.80339	0.00521482	0.0122481
L2-7_01228	L2-7_01228	-0.426423	4.7299	2.77072	0.0960031	0.153627
L2-7_00023	rpsO	-0.425915	8.78648	3.09434	0.0785649	0.129038
L2-7_02721	L2-7_02721	-0.425811	5.88481	3.23423	0.0721144	0.120492
L2-7_02974	nagA	-0.425771	5.13981	5.19308	0.022677	0.0440645
L2-7_00776	pnuC	-0.425262	5.80803	12.0632	0.000514277	0.00159403
L2-7_03036	L2-7_03036	-0.423398	1.08194	1.40641	0.235654	0.327206
L2-7_00004	purD	-0.423171	9.86937	4.40454	0.0358433	0.06638
L2-7_01101	L2-7_01101	-0.422729	7.16801	7.38595	0.00657355	0.0150115
L2-7_00368	gppA	-0.422684	6.75393	12.019	0.000526604	0.00162148
L2-7_01748	hup	-0.422684	7.46685	3.32063	0.0684155	0.115204
L2-7_02319	L2-7_02319	-0.42162	3.12293	2.34963	0.125313	0.19261
L2-7_02030	hscC	-0.421127	7.52047	7.58566	0.00588345	0.0136356
L2-7_00833	rlmH_1	-0.42048	4.96696	9.73487	0.00180805	0.00482491
L2-7_00299	L2-7_00299	-0.419828	4.12385	1.34767	0.245687	0.33912
L2-7_01693	nudI	-0.417021	5.06024	9.19286	0.00242961	0.00627166
L2-7_00522	L2-7_00522	-0.41696	3.03245	4.95471	0.0260197	0.0496643
L2-7_02841	L2-7_02841	-0.416177	1.35486	0.996492	0.318161	0.414838
L2-7_02924	L2-7_02924	-0.415181	4.93543	1.55704	0.2121	0.300305
L2-7_02310	gltP	-0.414132	4.94278	4.13781	0.0419354	0.0755647
L2-7_00903	L2-7_00903	-0.41356	3.64073	2.89254	0.0889908	0.143388
L2-7_01790	ffh	-0.413537	7.58339	5.61552	0.0178021	0.0358859
L2-7_02011	L2-7_02011	-0.412784	7.20439	13.8078	0.000202499	0.00069791
L2-7_01631	L2-7_01631	-0.412367	2.78411	1.19757	0.273807	0.370632
L2-7_00615	L2-7_00615	-0.411947	2.69179	1.88532	0.16973	0.24965
L2-7_00909	L2-7_00909	-0.411822	7.73873	4.30752	0.0379442	0.0697178
L2-7_02743	L2-7_02743	-0.410874	3.21101	3.22027	0.0727318	0.121379
L2-7_02681	L2-7_02681	-0.410019	2.09756	3.19616	0.0738113	0.123034
L2-7_00654	rsmA	-0.408649	6.24707	11.201	0.000817552	0.00239121
L2-7_00932	proS	-0.408405	8.87681	5.18943	0.0227247	0.0440959
L2-7_01861	polA	-0.404215	7.46489	9.30182	0.00228926	0.00593816
L2-7_00311	ycfH_1	-0.403137	4.23747	2.51639	0.112668	0.176169
L2-7_02014	L2-7_02014	-0.401128	11.0768	4.19253	0.0406024	0.0739232
L2-7_00044	miaA	-0.400649	4.89994	4.64926	0.031067	0.0583443
L2-7_00586	cbiM	-0.400469	8.60891	1.93512	0.164199	0.242758
L2-7_00252	L2-7_00252	-0.399829	3.28922	0.627638	0.428223	0.52589
L2-7_02961	prtP	-0.398984	1.21757	2.62665	0.105083	0.165884
L2-7_00006	purM	-0.398633	9.46461	3.75501	0.0526494	0.0919151
L2-7_02008	acpP_2	-0.398427	6.5359	2.6785	0.101711	0.161288
L2-7_02925	L2-7_02925	-0.39834	5.21902	2.53706	0.111202	0.174071
L2-7_00705	phnX	-0.397923	1.32291	2.35224	0.125103	0.192498
L2-7_00398	norM_1	-0.397554	4.82558	7.18807	0.007339	0.0165039
L2-7_01212	tktB	-0.396915	9.21174	5.7554	0.016438	0.033449
L2-7_00804	L2-7_00804	-0.396393	5.02406	6.51228	0.0107132	0.0228799
L2-7_00865	L2-7_00865	-0.396036	-0.114672	0.831123	0.361948	0.459618
L2-7_02598	L2-7_02598	-0.395971	6.39395	1.5033	0.220164	0.309689
L2-7_00353	metH_1	-0.395481	7.46867	8.92769	0.00280879	0.00712884
L2-7_01621	rng	-0.394578	4.9451	3.05454	0.0805118	0.131618
L2-7_00984	murR_1	-0.393881	7.3323	2.20434	0.137622	0.20833
L2-7_00376	L2-7_00376	-0.392828	7.73059	4.26634	0.0388745	0.0711473
L2-7_02859	rpfC_5	-0.392274	6.26011	4.1556	0.0414969	0.0750158
L2-7_00008	L2-7_00008	-0.391955	8.81746	4.74894	0.0293163	0.0552634
L2-7_00724	yxlG	-0.390875	4.51584	4.36278	0.0367323	0.067681
L2-7_02863	pflB	-0.390651	6.81875	0.611143	0.434358	0.531704
L2-7_02538	ytrA_3	-0.38963	4.02202	0.233677	0.628811	0.70675
L2-7_02485	greA_1	-0.389048	7.82506	2.97466	0.0845778	0.137304
L2-7_00906	L2-7_00906	-0.38731	2.71681	2.7804	0.0954245	0.152876
L2-7_01355	L2-7_01355	-0.386389	2.18975	2.72321	0.0988987	0.157362
L2-7_02348	L2-7_02348	-0.385253	0.426451	1.20674	0.271979	0.36887
L2-7_02643	L2-7_02643	-0.384903	4.33971	3.11324	0.0776581	0.127773
L2-7_01648	L2-7_01648	-0.384275	1.01896	1.75108	0.185741	0.268272
L2-7_01976	proA	-0.384164	8.81901	4.26173	0.0389802	0.0712413
L2-7_02013	L2-7_02013	-0.382817	9.50113	3.62204	0.0570189	0.0985608
L2-7_00009	pyrC	-0.380117	7.64282	5.62307	0.0177256	0.0357575
L2-7_00146	L2-7_00146	-0.380073	1.59165	1.01703	0.313223	0.410118
L2-7_02044	L2-7_02044	-0.379852	4.75196	5.29119	0.0214336	0.0421156
L2-7_02720	rpfC_4	-0.378411	6.1112	5.12522	0.0235806	0.0454422
L2-7_00913	soxS_1	-0.377721	4.91467	2.92276	0.0873381	0.141213
L2-7_03062	L2-7_03062	-0.377705	1.02827	0.372914	0.54142	0.631845
L2-7_00350	L2-7_00350	-0.37535	5.24756	5.28424	0.0215193	0.0421956
L2-7_02956	tgt	-0.373152	8.04934	7.55603	0.00598096	0.0138387
L2-7_00051	dinB_1	-0.372829	8.36737	1.78055	0.182082	0.264212
L2-7_01512	dapL_1	-0.371612	8.69916	3.05936	0.0802735	0.131341
L2-7_01418	L2-7_01418	-0.371035	2.29574	1.87424	0.17099	0.25124
L2-7_01623	L2-7_01623	-0.370929	6.71205	7.67268	0.00560632	0.0130581
L2-7_00682	L2-7_00682	-0.370775	6.80965	8.91675	0.00282568	0.00715726
L2-7_01213	dxs_2	-0.366379	9.16749	4.18326	0.0408251	0.074136
L2-7_00279	L2-7_00279	-0.366298	0.0817021	0.76206	0.382685	0.480844
L2-7_03080	L2-7_03080	-0.365654	5.75285	0.965355	0.325841	0.422102
L2-7_01029	scpA	-0.365041	5.5397	3.24749	0.0715327	0.119663
L2-7_01979	glnP	-0.364907	10.9351	4.31112	0.0378641	0.0696162
L2-7_01468	moeZ	-0.363905	5.85453	5.91629	0.0150015	0.0308267
L2-7_02917	L2-7_02917	-0.363439	3.18217	1.59641	0.206412	0.293339
L2-7_02357	L2-7_02357	-0.362187	2.16819	0.328703	0.566424	0.653149
L2-7_01110	murE	-0.361723	7.77955	7.76274	0.00533351	0.0124954
L2-7_00383	L2-7_00383	-0.361667	2.85033	0.704152	0.401392	0.499271
L2-7_01736	L2-7_01736	-0.361119	8.03086	5.88371	0.0152816	0.0313233
L2-7_00678	L2-7_00678	-0.359944	1.39096	0.693141	0.405098	0.502918
L2-7_00374	purA	-0.359911	9.53489	3.29476	0.0695012	0.116822
L2-7_02915	L2-7_02915	-0.359759	3.31749	2.73575	0.0981257	0.156576
L2-7_02412	ydeH	-0.358016	5.5189	6.87355	0.00874808	0.0191286
L2-7_02123	L2-7_02123	-0.357526	1.48016	1.11034	0.292007	0.388511
L2-7_01860	coaE	-0.357457	5.24157	6.88083	0.00871253	0.0190956
L2-7_00800	L2-7_00800	-0.357097	5.17791	4.00528	0.0453579	0.0809508
L2-7_01250	ymdB_2	-0.356409	3.927	3.5042	0.0612133	0.104793
L2-7_00303	L2-7_00303	-0.355728	3.26111	2.8194	0.0931312	0.149287
L2-7_00656	tadA_1	-0.353484	4.69106	7.14438	0.00751992	0.0168172
L2-7_02048	glcR	-0.348474	1.96597	1.30075	0.254077	0.349153
L2-7_02792	hicB	-0.347857	4.91921	4.16812	0.0411914	0.0746562
L2-7_01490	yciC	-0.346902	7.46717	3.3684	0.0664581	0.112381
L2-7_01402	aspC_2	-0.346584	9.52048	4.60461	0.0318861	0.059725
L2-7_02422	ogt	-0.346428	4.49212	6.1162	0.0133948	0.0280667
L2-7_01767	pmpR	-0.345969	7.51238	1.44823	0.228811	0.319447
L2-7_02203	gspF	-0.345923	5.31864	4.45637	0.0347714	0.0645655
L2-7_00780	malR	-0.344646	3.96202	3.45495	0.0630627	0.107418
L2-7_00217	guaB	-0.344436	9.55745	1.86717	0.1718	0.251747
L2-7_02126	pncB2	-0.344399	8.7115	4.25495	0.0391361	0.0713464
L2-7_02015	rplK	-0.343582	10.9193	3.40679	0.0649285	0.110194
L2-7_01900	lytR_1	-0.342683	8.21594	7.30147	0.00688982	0.015649
L2-7_01028	scpB	-0.342515	5.98926	2.86593	0.0904736	0.145443
L2-7_02697	dtd	-0.342463	3.17716	2.49376	0.114298	0.178222
L2-7_00986	ywpJ_1	-0.34139	6.16458	1.68961	0.193652	0.27812
L2-7_03044	L2-7_03044	-0.340969	1.18642	0.43731	0.508424	0.60186
L2-7_02683	potD_3	-0.340843	5.19151	2.83962	0.0919659	0.147588
L2-7_01453	gltC	-0.338976	7.03743	6.93796	0.00843852	0.0186033
L2-7_01369	L2-7_01369	-0.337644	6.93006	5.2818	0.0215495	0.042225
L2-7_01119	thiN	-0.336067	7.21385	4.74826	0.0293279	0.0552634
L2-7_00681	L2-7_00681	-0.335077	6.45171	5.85786	0.0155076	0.031694
L2-7_00244	crp	-0.334902	3.60926	3.59347	0.0580068	0.0999601
L2-7_02185	L2-7_02185	-0.332294	7.83111	3.97026	0.0463107	0.082389
L2-7_01223	dnaX_2	-0.332171	8.95639	4.36304	0.0367266	0.067681
L2-7_02851	dhaS	-0.331053	4.29193	3.06319	0.0800844	0.131149
L2-7_01977	proB	-0.330958	7.82885	2.85091	0.0913224	0.146639
L2-7_00593	L2-7_00593	-0.329525	8.13256	4.17763	0.0409609	0.0743345
L2-7_01258	L2-7_01258	-0.327924	5.76945	6.85651	0.00883187	0.0192733
L2-7_02910	uvrA	-0.326742	8.84313	4.14898	0.0416596	0.0752292
L2-7_02018	L2-7_02018	-0.326051	5.4633	5.96077	0.0146277	0.0301817
L2-7_01100	rsuA	-0.325841	5.37148	4.09383	0.04304	0.0773064
L2-7_02356	traG_3	-0.325225	4.03193	0.294046	0.587639	0.670972
L2-7_00971	L2-7_00971	-0.324583	4.95746	2.82648	0.0927216	0.148715
L2-7_00305	L2-7_00305	-0.324472	5.49403	2.50544	0.113454	0.177102
L2-7_01419	mtrR_1	-0.322874	2.62736	1.43441	0.231046	0.321926
L2-7_02526	metF	-0.32238	5.7281	3.89111	0.0485423	0.085706
L2-7_01719	L2-7_01719	-0.320011	5.28273	4.56163	0.032696	0.0609542
L2-7_01752	L2-7_01752	-0.317957	0.777128	0.742773	0.388774	0.487403
L2-7_02111	L2-7_02111	-0.317715	5.21377	1.72139	0.189514	0.273017
L2-7_01099	rsmF_2	-0.317671	6.92685	5.96465	0.0145955	0.0301598
L2-7_01509	L2-7_01509	-0.316733	4.13574	1.49581	0.221317	0.310997
L2-7_00297	ntcA_1	-0.315689	6.27995	1.28102	0.257709	0.353278
L2-7_01396	spo0A_1	-0.315282	0.348364	0.6746	0.411452	0.508496
L2-7_01413	L2-7_01413	-0.313808	4.0632	2.30525	0.128938	0.197099
L2-7_01131	trkG	-0.313	6.91271	7.14887	0.00750114	0.0168011
L2-7_01694	L2-7_01694	-0.312013	3.43619	3.30098	0.0692386	0.11645
L2-7_01318	L2-7_01318	-0.310988	5.08695	1.39295	0.237908	0.329683
L2-7_01980	glnH_2	-0.310018	10.4165	2.86855	0.090326	0.145383
L2-7_01334	L2-7_01334	-0.309356	6.67165	2.41499	0.120179	0.185635
L2-7_02424	L2-7_02424	-0.308028	7.64422	5.49318	0.0190908	0.0381
L2-7_01336	ftsW_1	-0.307985	6.04825	1.88634	0.169616	0.249613
L2-7_02523	queC_2	-0.307947	6.45831	1.15769	0.281946	0.378358
L2-7_00364	folP	-0.30736	5.49243	4.59265	0.0321092	0.0600201
L2-7_02201	L2-7_02201	-0.307222	3.76331	1.76986	0.183399	0.26571
L2-7_01558	glyA	-0.306315	8.76619	1.80346	0.179295	0.261114
L2-7_00375	epsH_1	-0.303314	9.3065	2.34728	0.125502	0.192794
L2-7_01547	L2-7_01547	-0.303292	4.83941	0.703873	0.401485	0.499271
L2-7_01054	hslO	-0.302838	5.58431	5.13925	0.0233908	0.0452319
L2-7_00444	mntR_1	-0.302123	2.09024	1.54496	0.213881	0.302368
L2-7_02306	L2-7_02306	-0.30193	4.30266	2.05784	0.151425	0.226169
L2-7_00587	cbiN	-0.301614	6.84605	1.13403	0.286917	0.38346
L2-7_00508	murC	-0.300443	8.52031	3.40119	0.0651495	0.110435
L2-7_00258	L2-7_00258	-0.299601	2.99479	2.29051	0.130167	0.198437
L2-7_01342	L2-7_01342	-0.29926	6.35834	3.12183	0.0772502	0.127401
L2-7_01981	L2-7_01981	-0.298578	6.11451	0.377662	0.538857	0.629116
L2-7_00017	L2-7_00017	-0.297623	6.43215	6.31689	0.0119593	0.0253288
L2-7_01335	L2-7_01335	-0.296853	4.65727	1.93782	0.163905	0.242611
L2-7_00856	L2-7_00856	-0.296399	10.0242	0.479646	0.488583	0.582062
L2-7_02909	L2-7_02909	-0.295095	0.934332	0.532395	0.465602	0.561367
L2-7_01769	ndoA_2	-0.294691	4.45679	2.22968	0.135382	0.205828
L2-7_00318	L2-7_00318	-0.294677	4.28976	0.801807	0.370554	0.467909
L2-7_00655	L2-7_00655	-0.294518	6.35474	5.15023	0.0232432	0.0449776
L2-7_02861	deoR_4	-0.293897	6.08069	2.43591	0.118585	0.183781
L2-7_00658	lysS	-0.292451	9.2332	2.30381	0.129057	0.197175
L2-7_00772	L2-7_00772	-0.292271	4.64465	3.95478	0.0467385	0.0830307
L2-7_00905	L2-7_00905	-0.290474	2.3896	1.12765	0.288278	0.384828
L2-7_02003	rpsI	-0.28979	9.86039	1.77788	0.18241	0.264414
L2-7_02954	rsmE	-0.289136	6.70131	4.37095	0.0365565	0.0675616
L2-7_00619	L2-7_00619	-0.288359	3.0708	1.08532	0.297511	0.392712
L2-7_01317	L2-7_01317	-0.288294	4.93191	1.454	0.227887	0.318633
L2-7_03022	L2-7_03022	-0.28532	3.4948	1.69512	0.192928	0.277364
L2-7_01577	tauB	-0.283609	1.64504	1.1089	0.292321	0.388743
L2-7_02911	uvrB_1	-0.283478	8.40276	3.67463	0.0552464	0.0961129
L2-7_00362	glnA_1	-0.2834	10.1177	1.511	0.218987	0.308342
L2-7_02016	rplA	-0.282225	11.8977	1.95023	0.162563	0.241005
L2-7_02682	greA_2	-0.280822	4.88868	2.66308	0.102702	0.162766
L2-7_01449	ydiN	-0.280543	5.97291	0.948664	0.33006	0.426777
L2-7_02871	L2-7_02871	-0.279819	3.24416	0.888174	0.345973	0.442271
L2-7_02390	flK	-0.279207	5.29985	3.55113	0.0595048	0.10229
L2-7_01304	cmpR_1	-0.278043	5.87601	4.16686	0.0412222	0.0746637
L2-7_01341	L2-7_01341	-0.276161	4.82505	1.92944	0.16482	0.243322
L2-7_00298	L2-7_00298	-0.276023	5.34962	0.717902	0.396833	0.495413
L2-7_00320	L2-7_00320	-0.274142	5.19346	2.23654	0.134782	0.205026
L2-7_02944	L2-7_02944	-0.273628	8.4645	1.60494	0.205205	0.292315
L2-7_01017	L2-7_01017	-0.273527	5.69439	1.1823	0.276888	0.37381
L2-7_01703	lon1_1	-0.272904	7.73469	2.13882	0.143613	0.216462
L2-7_01451	L2-7_01451	-0.272646	6.21766	1.06876	0.301227	0.396262
L2-7_00773	hisA	-0.271963	5.06835	4.77948	0.0288008	0.0544533
L2-7_01863	apeA	-0.27016	8.02953	3.63486	0.0565814	0.0979858
L2-7_00861	L2-7_00861	-0.269742	7.76586	0.491038	0.483464	0.576945
L2-7_01197	L2-7_01197	-0.269737	5.21779	0.187914	0.664659	0.736967
L2-7_01343	L2-7_01343	-0.269402	5.17632	1.96085	0.161423	0.239442
L2-7_02494	gatA	-0.268501	8.3718	2.05147	0.152059	0.226874
L2-7_01338	L2-7_01338	-0.267185	6.17128	2.6086	0.106285	0.167592
L2-7_00612	L2-7_00612	-0.265863	4.84489	2.19969	0.138038	0.208847
L2-7_01450	aroE_1	-0.265021	5.40514	0.872876	0.35016	0.446789
L2-7_01177	L2-7_01177	-0.264507	6.6707	2.071	0.150123	0.224584
L2-7_00304	L2-7_00304	-0.263655	5.83081	3.03413	0.0815303	0.132973
L2-7_02493	gatC	-0.26306	4.93937	0.98527	0.320901	0.417828
L2-7_02555	leuS	-0.262768	10.4727	2.0861	0.148645	0.222729
L2-7_03008	L2-7_03008	-0.262654	2.89886	1.27076	0.259625	0.355209
L2-7_02261	aseR	-0.262351	5.26796	1.3545	0.244493	0.337806
L2-7_01689	hcp_2	-0.261664	6.22878	0.814736	0.366724	0.464749
L2-7_01132	trkA	-0.259006	6.9161	4.39607	0.0360219	0.0666227
L2-7_01072	mutT	-0.258832	3.94533	1.96402	0.161084	0.23932
L2-7_02877	yeaJ_2	-0.258699	3.02099	0.97123	0.324374	0.42058
L2-7_02430	L2-7_02430	-0.258271	2.8961	1.1488	0.2838	0.380482
L2-7_01652	L2-7_01652	-0.258048	3.97399	1.53657	0.215129	0.303673
L2-7_01047	recX	-0.25756	6.09528	3.32979	0.0680355	0.114772
L2-7_02414	L2-7_02414	-0.257348	4.74242	0.406278	0.523865	0.6152
L2-7_00321	L2-7_00321	-0.257085	8.31327	0.253364	0.614716	0.69397
L2-7_01354	glmM	-0.256109	8.83684	3.34668	0.0673406	0.113668
L2-7_02654	L2-7_02654	-0.255487	1.86916	0.946077	0.33072	0.42704
L2-7_02612	rnhA	-0.255435	3.47023	1.96129	0.161376	0.239442
L2-7_01430	L2-7_01430	-0.255348	6.21401	1.28151	0.257619	0.353278
L2-7_02527	murR_2	-0.255041	4.44709	1.70382	0.191789	0.275869
L2-7_01248	mepA_6	-0.254913	7.70547	3.13621	0.0765714	0.126655
L2-7_02878	L2-7_02878	-0.25321	1.2915	0.268738	0.604179	0.684834
L2-7_00354	L2-7_00354	-0.252826	6.47972	3.27667	0.0702716	0.117905
L2-7_01503	DmdB	-0.250608	6.21068	1.34061	0.246926	0.340495
L2-7_01635	L2-7_01635	-0.249532	3.09274	0.903216	0.341921	0.437871
L2-7_00122	L2-7_00122	-0.249347	8.64556	0.868722	0.351309	0.447847
L2-7_00664	L2-7_00664	-0.249085	6.1944	2.15047	0.142526	0.21494
L2-7_01973	ywaC_1	-0.245407	7.11451	2.21112	0.137019	0.207752
L2-7_02727	L2-7_02727	-0.245235	2.35614	1.12598	0.288634	0.38512
L2-7_00583	L2-7_00583	-0.242895	5.27367	0.72373	0.394923	0.493786
L2-7_02575	dnaG_4	-0.241765	-0.00478438	0.358521	0.549329	0.638976
L2-7_00801	cobD	-0.239646	5.53324	2.32091	0.127645	0.19523
L2-7_00929	fba	-0.239326	11.7155	1.19959	0.273404	0.370512
L2-7_02181	rplI	-0.238826	6.59544	1.96244	0.161253	0.239442
L2-7_02672	L2-7_02672	-0.238646	5.34564	2.7025	0.100191	0.159147
L2-7_00622	dnaX_1	-0.238043	5.63453	2.22716	0.135603	0.206052
L2-7_01244	L2-7_01244	-0.236912	5.01525	1.786	0.181414	0.263516
L2-7_00007	purE_1	-0.23603	8.33904	1.71481	0.190363	0.273958
L2-7_02043	L2-7_02043	-0.235669	1.46261	0.674362	0.411535	0.508496
L2-7_00369	ppk_1	-0.235132	7.77	3.46922	0.0625206	0.106699
L2-7_01757	L2-7_01757	-0.234244	4.40827	1.64649	0.199438	0.284969
L2-7_00352	yitJ	-0.233363	6.89054	2.72588	0.098734	0.157189
L2-7_02554	yciB	-0.23086	7.8883	3.46732	0.0625928	0.106747
L2-7_02256	L2-7_02256	-0.230722	0.620283	0.256132	0.61279	0.692075
L2-7_00451	dinB_3	-0.23005	3.80826	0.933405	0.33398	0.430258
L2-7_02631	L2-7_02631	-0.229608	-0.183661	0.219603	0.639343	0.716003
L2-7_00139	hpdA	-0.227514	4.2891	1.0753	0.299752	0.394878
L2-7_00265	L2-7_00265	-0.22704	4.16841	1.10482	0.29321	0.389188
L2-7_00372	purB	-0.226603	9.62621	1.60571	0.205096	0.292309
L2-7_02757	glmS	-0.226339	9.97609	1.82908	0.176237	0.257353
L2-7_02429	gltS	-0.226048	5.61077	2.44547	0.117865	0.182953
L2-7_02294	fumA	-0.225491	7.27474	2.17475	0.140293	0.211799
L2-7_00722	L2-7_00722	-0.225316	2.47576	1.1001	0.294245	0.389841
L2-7_00455	L2-7_00455	-0.225098	1.76321	0.631	0.426989	0.524977
L2-7_01249	L2-7_01249	-0.224964	5.64207	2.56468	0.109275	0.171437
L2-7_01455	L2-7_01455	-0.224827	3.87534	0.347832	0.555343	0.644336
L2-7_01744	L2-7_01744	-0.224564	4.6132	2.35137	0.125173	0.192499
L2-7_01118	rsgA	-0.224231	7.19296	2.48597	0.114866	0.179007
L2-7_01677	L2-7_01677	-0.22291	5.19751	1.19867	0.273587	0.370512
L2-7_02458	rpsL	-0.222417	11.3154	0.873462	0.349999	0.446786
L2-7_00975	L2-7_00975	-0.222243	2.63496	0.802548	0.370333	0.467841
L2-7_00860	livF	-0.221199	8.45098	0.307141	0.57944	0.664045
L2-7_00668	ssuA	-0.221168	0.157696	0.284135	0.594003	0.676309
L2-7_01482	srpC_2	-0.217576	5.26745	0.709542	0.399596	0.498073
L2-7_02081	dapH	-0.216164	4.68025	1.86908	0.17158	0.251711
L2-7_02587	L2-7_02587	-0.21554	4.01722	1.33201	0.248448	0.342425
L2-7_02614	znuC	-0.215124	4.90393	1.07995	0.29871	0.394061
L2-7_00227	ycdZ	-0.214947	6.22583	1.615	0.20379	0.290743
L2-7_02273	L2-7_02273	-0.213033	4.61764	1.34167	0.24674	0.340407
L2-7_00385	nrdR	-0.211879	5.30239	0.575825	0.447953	0.544068
L2-7_02083	alaS_2	-0.211491	8.38337	1.67122	0.196096	0.28112
L2-7_01417	L2-7_01417	-0.211163	4.06052	1.18035	0.277284	0.374012
L2-7_02388	ligA	-0.211127	8.86579	1.44024	0.230101	0.320927
L2-7_00721	tipA	-0.210793	4.61773	1.47773	0.224129	0.314792
L2-7_01339	stp_2	-0.210366	5.99257	1.59617	0.206447	0.293339
L2-7_00540	ribE	-0.209599	9.94902	1.45945	0.227018	0.317652
L2-7_00592	cysNC	-0.209457	9.13706	1.44092	0.22999	0.320927
L2-7_03004	L2-7_03004	-0.209005	4.98462	1.43311	0.231258	0.32206
L2-7_00510	dnaC_1	-0.208721	8.04017	1.5876	0.207669	0.294776
L2-7_01452	L2-7_01452	-0.208039	4.93656	0.717603	0.396931	0.495413
L2-7_00828	cph2_1	-0.207011	7.57755	2.09428	0.147852	0.221825
L2-7_02719	hndD_2	-0.206582	5.1196	1.87033	0.171437	0.251711
L2-7_01091	L2-7_01091	-0.203625	8.09073	2.08866	0.148397	0.222476
L2-7_00479	L2-7_00479	-0.203479	6.83491	0.672767	0.412089	0.50889
L2-7_01117	prkC_2	-0.201798	8.78834	1.44922	0.228653	0.319384
L2-7_01008	L2-7_01008	-0.200621	7.50283	1.51817	0.217896	0.306961
L2-7_00968	modA	-0.199838	4.1471	1.05136	0.305194	0.40054
L2-7_01610	tcrA	-0.199706	5.24417	1.63684	0.200759	0.286711
L2-7_00138	metK_1	-0.1997	6.15814	1.43663	0.230685	0.321582
L2-7_02202	L2-7_02202	-0.198597	3.99008	1.27847	0.258184	0.353756
L2-7_02380	mutX	-0.198449	2.69213	0.624001	0.429564	0.526794
L2-7_00625	rsmI	-0.198143	6.02292	1.94178	0.163475	0.242102
L2-7_00161	L2-7_00161	-0.1981	7.28563	2.26229	0.132558	0.201863
L2-7_02002	rplM	-0.19748	10.0684	0.787241	0.374936	0.472591
L2-7_00553	toxA_1	-0.197049	4.11021	0.586523	0.443767	0.53992
L2-7_01807	L2-7_01807	-0.196579	7.22665	2.22121	0.136126	0.206623
L2-7_01146	argR	-0.195121	6.12633	1.81267	0.178188	0.259637
L2-7_02426	L2-7_02426	-0.194679	2.11119	0.450715	0.501996	0.595509
L2-7_00478	L2-7_00478	-0.193752	7.08331	0.59297	0.441273	0.537352
L2-7_01704	engB	-0.192381	6.32109	1.42334	0.232854	0.32396
L2-7_02389	rluF	-0.191104	6.61077	1.55015	0.213113	0.301435
L2-7_02881	cls_2	-0.190707	1.98374	0.752723	0.385615	0.483876
L2-7_02012	yncF	-0.190707	6.21062	1.4612	0.22674	0.317504
L2-7_02122	L2-7_02122	-0.188121	4.38289	0.973187	0.323887	0.420348
L2-7_00969	L2-7_00969	-0.187269	4.21293	1.40309	0.236206	0.327649
L2-7_01690	hom_2	-0.186101	8.17051	0.617784	0.431872	0.529294
L2-7_01762	niaR	-0.185487	5.18822	1.9058	0.167431	0.246786
L2-7_00642	L2-7_00642	-0.185283	6.2041	0.663056	0.415483	0.512631
L2-7_00257	L2-7_00257	-0.184864	1.2975	0.246875	0.619284	0.697441
L2-7_01702	clpX_2	-0.184786	9.2302	0.731856	0.392282	0.490703
L2-7_02806	mnmA	-0.184048	7.11794	1.55993	0.211676	0.299856
L2-7_03003	L2-7_03003	-0.183389	3.07947	0.187005	0.665421	0.736967
L2-7_02097	L2-7_02097	-0.182552	2.33497	0.684078	0.408186	0.505259
L2-7_01165	ftsY	-0.182196	6.76719	1.2182	0.269714	0.366864
L2-7_02082	L2-7_02082	-0.181647	8.22479	1.21405	0.270531	0.367618
L2-7_00731	drrA_2	-0.179902	7.05455	0.430063	0.511958	0.604512
L2-7_01104	recU	-0.179771	5.13875	1.98112	0.159272	0.237005
L2-7_01141	msbA	-0.179559	6.24674	1.90387	0.167645	0.246973
L2-7_00397	L2-7_00397	-0.179528	3.85053	1.06136	0.302905	0.398096
L2-7_01089	fabG_3	-0.179335	4.87066	1.07689	0.299394	0.394592
L2-7_02367	soj_5	-0.178938	0.530292	0.270267	0.603152	0.683947
L2-7_01489	L2-7_01489	-0.178905	7.26509	1.01508	0.313689	0.410411
L2-7_02796	L2-7_02796	-0.178796	4.01575	0.939776	0.332335	0.428534
L2-7_02131	yehU_3	-0.178115	7.96096	1.77804	0.18239	0.264414
L2-7_02234	L2-7_02234	-0.175826	0.909082	0.281388	0.595793	0.678071
L2-7_02241	alsT_3	-0.175727	7.90036	1.66503	0.196925	0.281954
L2-7_01771	rex	-0.174106	8.77623	1.09987	0.294295	0.389841
L2-7_02366	spo0C_5	-0.173667	0.860683	0.244365	0.621071	0.698892
L2-7_00213	glnS	-0.172448	9.10671	0.879917	0.348224	0.444724
L2-7_01403	L2-7_01403	-0.172347	8.08217	1.19482	0.274359	0.3712
L2-7_02675	L2-7_02675	-0.172056	3.30198	0.920628	0.33731	0.432704
L2-7_01428	L2-7_01428	-0.170092	7.53917	0.919392	0.337635	0.432778
L2-7_02800	L2-7_02800	-0.169854	4.12693	1.23289	0.266845	0.363985
L2-7_00963	dnaE	-0.16939	7.53075	1.83026	0.176097	0.257353
L2-7_00930	cbf2	-0.168936	9.35596	0.287565	0.591785	0.674332
L2-7_00395	L2-7_00395	-0.168447	2.53319	0.600945	0.438218	0.534793
L2-7_02889	yxdL	-0.168242	2.6069	0.648477	0.420658	0.518103
L2-7_01999	ykoD_3	-0.167531	4.42314	0.512578	0.474025	0.56883
L2-7_01641	ltrA_1	-0.166861	11.47	0.493318	0.482451	0.575981
L2-7_00957	uvrC	-0.166771	7.41975	1.31414	0.251646	0.346493
L2-7_01574	L2-7_01574	-0.166203	5.18774	1.12461	0.288928	0.385329
L2-7_00686	L2-7_00686	-0.16579	4.38626	0.954698	0.328526	0.425145
L2-7_01514	L2-7_01514	-0.164642	6.50267	0.38913	0.532757	0.623292
L2-7_02460	fusA	-0.16438	13.2039	0.438734	0.507734	0.601298
L2-7_02937	rpmF	-0.163822	9.65198	0.552869	0.457148	0.553795
L2-7_01412	rpfC_2	-0.162807	6.22054	0.64732	0.421072	0.518179
L2-7_02813	mutS2	-0.162693	8.13857	0.82915	0.362518	0.460003
L2-7_01820	comEA	-0.162649	7.11215	0.548855	0.458786	0.554581
L2-7_02995	L2-7_02995	-0.16084	3.45605	1.16547	0.280333	0.376555
L2-7_00200	hsdR_1	-0.160396	7.0341	1.59718	0.206304	0.293339
L2-7_01319	L2-7_01319	-0.160131	3.08642	0.251362	0.616117	0.695031
L2-7_00462	L2-7_00462	-0.16006	3.09053	0.315523	0.574311	0.659786
L2-7_02763	dacF_3	-0.159946	3.72757	0.353353	0.552221	0.641777
L2-7_00145	L2-7_00145	-0.158784	3.68846	0.501125	0.479006	0.572845
L2-7_01940	L2-7_01940	-0.158003	6.21628	1.11115	0.291832	0.388463
L2-7_02307	L2-7_02307	-0.157593	3.35496	0.485142	0.486102	0.579599
L2-7_02334	L2-7_02334	-0.156346	7.98713	0.399591	0.527301	0.618458
L2-7_01254	L2-7_01254	-0.155273	3.68332	0.350672	0.553733	0.642734
L2-7_00959	L2-7_00959	-0.154497	7.81818	1.11454	0.291097	0.388037
L2-7_01982	L2-7_01982	-0.154262	8.93202	0.518826	0.471343	0.565949
L2-7_00416	L2-7_00416	-0.154151	0.784862	0.170902	0.679311	0.749973
L2-7_00171	L2-7_00171	-0.154126	2.41255	0.181682	0.669932	0.741663
L2-7_00858	L2-7_00858	-0.153415	8.31319	0.146234	0.70216	0.769438
L2-7_01332	L2-7_01332	-0.151438	6.70607	0.502505	0.478401	0.572366
L2-7_00987	recJ	-0.151158	7.74194	0.431356	0.511324	0.604018
L2-7_02620	L2-7_02620	-0.150784	3.89554	0.219201	0.63965	0.71606
L2-7_01114	rsmB	-0.150184	8.29556	1.00383	0.316386	0.413101
L2-7_02615	znuB	-0.150158	5.74345	0.368702	0.543712	0.633728
L2-7_01112	def_1	-0.149344	6.00835	1.74096	0.187017	0.269697
L2-7_01115	rlmN	-0.148616	7.7565	1.0913	0.296183	0.391465
L2-7_00391	rpsB	-0.147656	11.1843	0.625365	0.429061	0.5266
L2-7_01688	L2-7_01688	-0.147543	3.57153	0.355218	0.551174	0.640826
L2-7_01098	yjbM	-0.147532	7.2713	0.737778	0.390374	0.489186
L2-7_00775	proX	-0.146976	5.326	1.25487	0.262625	0.358963
L2-7_00554	L2-7_00554	-0.143458	5.16102	0.537093	0.46364	0.559724
L2-7_02432	mepA_13	-0.141266	6.03978	0.803651	0.370004	0.467637
L2-7_01251	mepA_7	-0.140883	5.84911	0.921137	0.337177	0.432704
L2-7_03037	L2-7_03037	-0.140752	3.61662	0.495965	0.481279	0.574826
L2-7_00541	ribD	-0.140324	11.4337	0.51864	0.471422	0.565949
L2-7_01406	L2-7_01406	-0.140145	3.66971	0.206214	0.649751	0.724763
L2-7_01991	map_2	-0.139892	6.68846	0.46752	0.49413	0.587422
L2-7_01164	tdcB	-0.139892	7.47251	0.703936	0.401464	0.499271
L2-7_02438	sir	-0.139209	6.95956	0.977343	0.322856	0.419204
L2-7_01257	L2-7_01257	-0.138869	4.27034	0.67421	0.411588	0.508496
L2-7_02249	patA_3	-0.137015	7.0592	1.07392	0.300063	0.395101
L2-7_01429	L2-7_01429	-0.13701	1.14495	0.188603	0.664082	0.736933
L2-7_00361	glyQS	-0.136137	9.86601	0.555077	0.456251	0.553187
L2-7_01056	cls_1	-0.13598	6.10971	0.993625	0.318858	0.415553
L2-7_00859	lptB	-0.135652	8.46872	0.115378	0.734103	0.797127
L2-7_00159	L2-7_00159	-0.135284	6.25747	0.841271	0.359033	0.456691
L2-7_00665	L2-7_00665	-0.134433	7.45964	0.764929	0.38179	0.479936
L2-7_01242	L2-7_01242	-0.133918	1.09977	0.15772	0.691264	0.760174
L2-7_01754	tilS	-0.133783	6.01739	0.623918	0.429595	0.526794
L2-7_01116	stp_1	-0.132485	6.97535	1.0474	0.306106	0.401549
L2-7_00970	lysA	-0.132462	6.22349	0.323824	0.569318	0.655394
L2-7_01469	L2-7_01469	-0.1321	2.12259	0.248322	0.618259	0.696847
L2-7_00647	L2-7_00647	-0.132099	7.46934	0.522303	0.469861	0.565043
L2-7_01068	rnr	-0.132064	6.93212	1.06988	0.300973	0.396114
L2-7_00501	rsmF_1	-0.13179	7.12656	0.627445	0.428294	0.52589
L2-7_00259	L2-7_00259	-0.131505	6.36047	0.946693	0.330563	0.427034
L2-7_03016	L2-7_03016	-0.131339	2.28618	0.367685	0.544269	0.634113
L2-7_02688	aspS_2	-0.130811	9.34724	0.663377	0.41537	0.512631
L2-7_02363	L2-7_02363	-0.130459	2.02619	0.305308	0.580574	0.665072
L2-7_01035	thiE	-0.129674	2.00018	0.277391	0.598416	0.679952
L2-7_01814	argG	-0.12844	9.00759	0.334691	0.56291	0.650959
L2-7_01320	L2-7_01320	-0.127779	2.93687	0.150875	0.697701	0.765449
L2-7_01090	L2-7_01090	-0.127455	8.7156	0.647272	0.42109	0.518179
L2-7_01507	L2-7_01507	-0.127207	5.15621	0.260883	0.609514	0.689765
L2-7_00941	murAB	-0.125475	7.74742	0.703453	0.401626	0.499271
L2-7_02890	yxdM	-0.124885	3.82316	0.525019	0.468708	0.564384
L2-7_02246	aroE_3	-0.124644	3.79667	0.11579	0.733646	0.797082
L2-7_00648	csd	-0.12429	5.91266	0.126003	0.722612	0.787538
L2-7_02192	dhaT	-0.124005	5.08365	0.550684	0.458038	0.554011
L2-7_01546	L2-7_01546	-0.123634	6.27269	0.173727	0.676821	0.748267
L2-7_02308	alaA	-0.122211	7.00602	0.601427	0.438034	0.534793
L2-7_01619	L2-7_01619	-0.121188	9.97695	0.307161	0.579427	0.664045
L2-7_02880	hssR	-0.119535	2.23588	0.314335	0.575032	0.660344
L2-7_00640	nrdD	-0.119363	8.36341	0.43484	0.509624	0.602876
L2-7_01371	L2-7_01371	-0.118252	7.34016	0.52119	0.470334	0.56537
L2-7_00481	gatD	-0.118157	2.54031	0.29703	0.58575	0.66936
L2-7_01259	L2-7_01259	-0.11792	6.1741	0.834826	0.360881	0.458797
L2-7_00158	yrrK	-0.117151	7.34623	0.770056	0.3802	0.47858
L2-7_01340	stkP	-0.115877	6.47031	0.561888	0.453501	0.550329
L2-7_02459	rpsG	-0.115696	11.3114	0.220817	0.638418	0.715274
L2-7_02588	L2-7_02588	-0.115535	1.71518	0.142104	0.706199	0.772353
L2-7_01459	aroK	-0.115372	6.27706	0.231159	0.630666	0.707983
L2-7_02080	polC	-0.115219	8.28903	0.477431	0.489588	0.58282
L2-7_01770	nnr	-0.114502	6.45223	0.462072	0.496657	0.58998
L2-7_02495	gatB	-0.113782	8.66896	0.328683	0.566435	0.653149
L2-7_02625	L2-7_02625	-0.113241	4.44711	0.143262	0.705059	0.771624
L2-7_01500	hacA	-0.11273	8.74913	0.346369	0.556176	0.645035
L2-7_01351	macB_1	-0.112132	7.19961	0.595807	0.440182	0.53649
L2-7_02581	L2-7_02581	-0.111709	6.67575	0.390075	0.53226	0.622971
L2-7_02545	L2-7_02545	-0.111666	5.93162	0.893597	0.344504	0.440978
L2-7_02745	L2-7_02745	-0.111515	4.98095	0.551917	0.457535	0.554011
L2-7_02888	graS	-0.110732	3.4796	0.299836	0.583986	0.668346
L2-7_02079	L2-7_02079	-0.110545	4.91673	0.403412	0.525333	0.616666
L2-7_00218	L2-7_00218	-0.110367	7.01513	0.250424	0.616777	0.695456
L2-7_01842	L2-7_01842	-0.110133	2.53556	0.247071	0.619145	0.697441
L2-7_00958	ftsH_1	-0.110005	9.07386	0.421621	0.516129	0.608156
L2-7_02726	L2-7_02726	-0.109891	4.43851	0.41018	0.521878	0.613897
L2-7_02413	ptsG_2	-0.109091	4.77695	0.644244	0.422178	0.51929
L2-7_00370	ybbD	-0.108197	7.04927	0.571992	0.449469	0.545672
L2-7_01460	L2-7_01460	-0.106044	1.80939	0.198052	0.656298	0.730438
L2-7_02124	L2-7_02124	-0.105914	4.35691	0.202624	0.652611	0.727373
L2-7_01103	rluC_2	-0.105338	6.8366	0.683901	0.408247	0.505259
L2-7_00226	rsmH_1	-0.104609	7.09719	0.318329	0.572614	0.658106
L2-7_02311	hin	-0.10456	3.21988	0.273933	0.600705	0.682
L2-7_02884	cbh_2	-0.104209	4.23227	0.337959	0.56101	0.649566
L2-7_02742	L2-7_02742	-0.103963	2.36932	0.265534	0.606343	0.687009
L2-7_00420	L2-7_00420	-0.103762	0.183469	0.0931634	0.760193	0.817111
L2-7_00338	L2-7_00338	-0.100934	6.20172	0.396111	0.529104	0.620055
L2-7_02734	nudF	-0.0999498	3.61536	0.310615	0.577303	0.662409
L2-7_02730	L2-7_02730	-0.0993373	6.70394	0.228861	0.63237	0.709611
L2-7_02026	L2-7_02026	-0.0977961	4.57986	0.220792	0.638437	0.715274
L2-7_01697	lldD	-0.0976178	6.04914	0.186998	0.665427	0.736967
L2-7_00911	Int-Tn_2	-0.0973754	4.93169	0.112476	0.737342	0.799414
L2-7_01483	srpC_3	-0.0971395	5.91267	0.161667	0.687626	0.757362
L2-7_01747	L2-7_01747	-0.0969807	7.52616	0.19375	0.659813	0.733068
L2-7_01590	ispD	-0.0969204	5.60316	0.297738	0.585304	0.669123
L2-7_00160	rnjA	-0.093854	9.67896	0.367075	0.544603	0.634239
L2-7_02004	yheS_2	-0.0936862	5.29052	0.38372	0.535619	0.625596
L2-7_01611	arlS_2	-0.0936688	5.86605	0.391468	0.531529	0.622375
L2-7_01706	L2-7_01706	-0.0935519	7.01655	0.504674	0.477454	0.57172
L2-7_02776	crcB	-0.0929492	5.24521	0.126409	0.722184	0.787378
L2-7_00778	adaA	-0.0929189	2.4844	0.124424	0.724285	0.789054
L2-7_00799	cobB_1	-0.0923079	6.69614	0.294218	0.58753	0.670972
L2-7_02287	dnaA	-0.0910686	7.72658	0.158993	0.690085	0.759175
L2-7_01620	rplU	-0.0903274	10.2132	0.195699	0.658215	0.731872
L2-7_01859	yycJ	-0.0888394	7.01251	0.222774	0.636935	0.714448
L2-7_02381	thrC	-0.0879205	7.91079	0.15548	0.693353	0.761574
L2-7_01559	luxQ_1	-0.0875864	5.71905	0.0768399	0.781626	0.836135
L2-7_01255	L2-7_01255	-0.0874646	4.99144	0.277756	0.598176	0.679952
L2-7_01718	sdpI	-0.0866198	6.8166	0.406855	0.52357	0.615113
L2-7_02258	L2-7_02258	-0.0865534	2.41311	0.114154	0.735464	0.79782
L2-7_01245	pepF1	-0.0864898	6.79374	0.329806	0.565773	0.653149
L2-7_00908	traG_1	-0.0854671	4.04816	0.214005	0.643646	0.718811
L2-7_00898	L2-7_00898	-0.0852636	0.243974	0.0492251	0.824417	0.872698
L2-7_01952	pucA	-0.0852492	4.61425	0.156787	0.692132	0.76083
L2-7_02457	rpoC	-0.0846146	11.956	0.212621	0.644721	0.719725
L2-7_02304	copA	-0.0845121	5.92601	0.327285	0.567262	0.653833
L2-7_01073	L2-7_01073	-0.0843711	3.83844	0.197922	0.656403	0.730438
L2-7_00594	srpC_1	-0.0835138	7.19567	0.40908	0.522437	0.614296
L2-7_02021	L2-7_02021	-0.0821148	2.92058	0.0713599	0.789367	0.842914
L2-7_02671	amiC	-0.0819993	5.03164	0.262177	0.608628	0.689041
L2-7_00660	L2-7_00660	-0.0808315	5.66006	0.0919292	0.761739	0.818088
L2-7_01997	rpoA	-0.0793249	11.0987	0.130847	0.717555	0.782635
L2-7_00542	L2-7_00542	-0.0789272	6.37856	0.188116	0.664489	0.736967
L2-7_01672	ywpJ_2	-0.0784371	4.44532	0.117109	0.732191	0.795811
L2-7_00396	ybhF_1	-0.0782622	3.44938	0.173258	0.677232	0.748267
L2-7_01166	smc_2	-0.0781563	8.25112	0.2892	0.590734	0.673682
L2-7_00135	btr_1	-0.0773685	3.75637	0.137136	0.711145	0.77746
L2-7_02027	L2-7_02027	-0.0765523	5.02206	0.245676	0.620136	0.698121
L2-7_00768	ssb_1	-0.0754096	10.905	0.0988228	0.753247	0.811768
L2-7_02456	rpoB	-0.0714288	11.9706	0.15453	0.694243	0.762253
L2-7_01499	L2-7_01499	-0.0689939	4.16407	0.12214	0.726725	0.791097
L2-7_02976	L2-7_02976	-0.0683433	3.73803	0.11185	0.738048	0.799695
L2-7_00452	lexA_1	-0.0680419	1.30261	0.0521176	0.819419	0.870031
L2-7_00663	L2-7_00663	-0.0678036	6.52442	0.10645	0.744222	0.804829
L2-7_01717	sdpR	-0.0677545	4.36872	0.19614	0.657855	0.731763
L2-7_00178	yxeP	-0.0672338	6.77535	0.257448	0.611879	0.692075
L2-7_02584	L2-7_02584	-0.0662371	5.80239	0.0988355	0.753232	0.811768
L2-7_00560	L2-7_00560	-0.0658811	4.8003	0.0136854	0.906872	0.934127
L2-7_01149	dxs_1	-0.0658659	8.16622	0.194844	0.658915	0.73236
L2-7_02321	cysK_2	-0.0652083	5.97962	0.0899064	0.764296	0.819892
L2-7_02127	L2-7_02127	-0.0628214	6.88825	0.199162	0.655398	0.729899
L2-7_03014	L2-7_03014	-0.0626664	3.6181	0.034269	0.853136	0.895809
L2-7_02243	yabJ	-0.0610012	6.068	0.143061	0.705257	0.771624
L2-7_01034	L2-7_01034	-0.0608284	1.71665	0.0498316	0.823357	0.872698
L2-7_00662	L2-7_00662	-0.0608094	7.79824	0.104352	0.746668	0.806851
L2-7_00857	livH	-0.060706	7.5272	0.0274113	0.8685	0.907698
L2-7_00624	L2-7_00624	-0.0596295	5.72966	0.16679	0.682981	0.753133
L2-7_02741	tnpR_3	-0.0595898	1.08281	0.0367671	0.84794	0.89287
L2-7_01408	L2-7_01408	-0.0589604	5.65538	0.0751847	0.783932	0.837749
L2-7_01097	spoIVA	-0.0574394	6.50622	0.167584	0.682268	0.752643
L2-7_01282	rpsJ	-0.0568212	10.4957	0.0431379	0.835466	0.880728
L2-7_01941	rpmB	-0.0561814	9.79439	0.0542845	0.815769	0.86747
L2-7_02010	recD2	-0.056007	8.67575	0.118619	0.730538	0.79463
L2-7_01069	L2-7_01069	-0.0554133	7.21772	0.112333	0.737504	0.799414
L2-7_00413	thiH	-0.0538775	4.14007	0.100422	0.751324	0.810631
L2-7_02689	rpfG_2	-0.0531962	6.82638	0.131799	0.716574	0.781869
L2-7_01370	L2-7_01370	-0.0520326	4.99634	0.107555	0.742945	0.803757
L2-7_00623	L2-7_00623	-0.0515408	5.80543	0.0931215	0.760246	0.817111
L2-7_01580	L2-7_01580	-0.0515118	10.1888	0.0471935	0.828021	0.875321
L2-7_02679	L2-7_02679	-0.0511544	2.25192	0.0499759	0.823105	0.872698
L2-7_00545	mprA	-0.0482006	1.26099	0.0203596	0.886537	0.921052
L2-7_02433	L2-7_02433	-0.0480465	1.62464	0.0358564	0.849812	0.893655
L2-7_02564	valS	-0.0470546	9.36495	0.0901413	0.763998	0.819886
L2-7_01407	L2-7_01407	-0.0463674	5.10914	0.02662	0.870395	0.908763
L2-7_01705	L2-7_01705	-0.0462386	6.09617	0.0854328	0.770066	0.825134
L2-7_01136	mepA_4	-0.0454568	3.22241	0.0311087	0.859998	0.900491
L2-7_01843	L2-7_01843	-0.0453377	3.18312	0.0506754	0.821892	0.872326
L2-7_02985	L2-7_02985	-0.0443094	12.8624	0.0451471	0.831734	0.878115
L2-7_02799	macB_4	-0.043579	1.2425	0.0163306	0.898314	0.928468
L2-7_01544	pnp	-0.0429305	9.29688	0.0207178	0.88555	0.92077
L2-7_01113	fmt	-0.0413768	7.6892	0.101563	0.749961	0.809785
L2-7_00770	L2-7_00770	-0.0409403	5.99905	0.0660455	0.797184	0.850289
L2-7_02159	fnr	-0.0407637	4.27796	0.0160069	0.899322	0.928824
L2-7_01707	L2-7_01707	-0.0377835	7.8241	0.0766968	0.781825	0.836135
L2-7_01383	L2-7_01383	-0.0377739	5.40458	0.0492405	0.82439	0.872698
L2-7_02984	ltrA_4	-0.0369681	4.90769	0.00442144	0.946985	0.96314
L2-7_00045	mutL	-0.0368888	6.04953	0.0283204	0.866358	0.905796
L2-7_01847	L2-7_01847	-0.0364756	1.93656	0.0126997	0.910274	0.936339
L2-7_02288	dnaN	-0.0357297	5.86744	0.0136113	0.907124	0.934127
L2-7_00720	L2-7_00720	-0.0355556	4.71972	0.0595597	0.807193	0.859541
L2-7_00995	rplT	-0.0340145	9.55984	0.0265798	0.870492	0.908763
L2-7_00951	L2-7_00951	-0.0337695	5.64201	0.0113085	0.915311	0.939321
L2-7_01636	L2-7_01636	-0.0334155	7.3001	0.0259698	0.871974	0.909632
L2-7_00602	murG	-0.0326849	8.27065	0.0337614	0.854215	0.896305
L2-7_00245	L2-7_00245	-0.0320231	8.12467	0.0529292	0.818042	0.869228
L2-7_02535	pbuG	-0.0308967	9.51275	0.0336746	0.854401	0.896305
L2-7_02168	L2-7_02168	-0.0302094	6.44645	0.0446792	0.832595	0.878694
L2-7_01601	L2-7_01601	-0.0290428	4.46282	0.0121591	0.912197	0.937284
L2-7_00504	pth	-0.0287684	6.52272	0.0301269	0.862203	0.902125
L2-7_03006	iap_2	-0.0277668	2.21103	0.00279857	0.95781	0.969225
L2-7_01102	L2-7_01102	-0.0273966	6.00515	0.0471216	0.82815	0.875321
L2-7_00667	purR	-0.0270662	5.84983	0.0382473	0.844947	0.890054
L2-7_00868	spo0C_2	-0.0270647	2.28194	0.0137606	0.906618	0.934127
L2-7_00371	purF	-0.0264797	9.17989	0.0228861	0.879754	0.915702
L2-7_02621	L2-7_02621	-0.0260174	1.96796	0.00451268	0.946441	0.962937
L2-7_02516	L2-7_02516	-0.0259969	6.03312	0.0206965	0.885609	0.92077
L2-7_01331	L2-7_01331	-0.0259903	5.12817	0.0186427	0.891396	0.924386
L2-7_00774	L2-7_00774	-0.0257445	6.09947	0.0178642	0.893674	0.925378
L2-7_01010	L2-7_01010	-0.0253042	6.38469	0.0327612	0.856367	0.897846
L2-7_01937	iphP	-0.0249888	4.96997	0.012389	0.911374	0.937126
L2-7_02009	mreB_2	-0.0248694	7.36425	0.0129044	0.909557	0.935945
L2-7_00141	L2-7_00141	-0.024107	2.7556	0.0141564	0.905291	0.933956
L2-7_02955	aroC	-0.0240061	6.7134	0.0320478	0.857923	0.898654
L2-7_00197	L2-7_00197	-0.0239635	5.45083	0.0190305	0.890279	0.92357
L2-7_02248	trmL	-0.023548	6.53015	0.0267299	0.870131	0.908763
L2-7_01372	L2-7_01372	-0.0234405	6.55036	0.0184527	0.891947	0.924616
L2-7_02290	recF	-0.0232766	7.02646	0.0104391	0.91862	0.941813
L2-7_02186	L2-7_02186	-0.0230888	2.35935	0.00662105	0.935148	0.954914
L2-7_02603	L2-7_02603	-0.0222911	8.06523	0.0200278	0.887459	0.921668
L2-7_00512	pbpD	-0.0218746	7.77073	0.0238499	0.877268	0.913793
L2-7_01208	mepA_5	-0.0218267	4.95403	0.00698624	0.933387	0.953464
L2-7_00564	dagK	-0.0202456	6.86565	0.0205302	0.886066	0.920904
L2-7_00539	ribBA	-0.0192329	11.9638	0.011948	0.912959	0.937724
L2-7_01140	L2-7_01140	-0.0188409	6.43807	0.0160746	0.89911	0.928824
L2-7_00306	L2-7_00306	-0.0184076	6.2885	0.0138906	0.90618	0.934127
L2-7_01121	ychF	-0.0176534	8.0428	0.00644857	0.935996	0.955084
L2-7_02351	L2-7_02351	-0.0169736	0.81123	0.00324226	0.954592	0.967363
L2-7_01998	rplQ	-0.0149214	10.1241	0.00407092	0.949126	0.964274
L2-7_01622	yocH	-0.0148122	7.09943	0.00628023	0.936835	0.955593
L2-7_02979	bvgS_2	-0.0146804	6.26759	0.0113815	0.91504	0.939321
L2-7_01423	L2-7_01423	-0.0146323	7.65844	0.00841209	0.926923	0.948243
L2-7_01624	L2-7_01624	-0.013482	8.1556	0.00935057	0.922966	0.944885
L2-7_00308	L2-7_00308	-0.0134188	6.21242	0.00879133	0.925298	0.946927
L2-7_02293	ttdA_2	-0.0129281	8.67036	0.00701273	0.933262	0.953464
L2-7_01983	L2-7_01983	-0.0123799	7.18305	0.00301879	0.956183	0.968278
L2-7_00041	mreB_1	-0.0121376	8.82084	0.00427633	0.947861	0.963681
L2-7_00142	cooS	-0.0121125	3.34535	0.00353183	0.95261	0.966056
L2-7_01387	L2-7_01387	-0.0118715	6.9259	0.00339965	0.953504	0.966613
L2-7_03013	L2-7_03013	-0.0114215	6.50752	0.005678	0.939934	0.957708
L2-7_01281	rplC	-0.0111052	10.4336	0.00169497	0.96716	0.975867
L2-7_02996	L2-7_02996	-0.0106016	3.98467	0.00514512	0.942817	0.960296
L2-7_01253	L2-7_01253	-0.00917272	4.20912	0.00194135	0.964856	0.974299
L2-7_01233	L2-7_01233	-0.00899546	1.63736	0.000995043	0.974835	0.981924
L2-7_01938	recG	-0.00672845	7.013	0.000988965	0.974912	0.981924
L2-7_02716	L2-7_02716	-0.00556764	4.46517	0.000712934	0.978698	0.985026
L2-7_00187	L2-7_00187	-0.00522409	1.10028	0.00017714	0.989381	0.991504
L2-7_02867	L2-7_02867	-0.00393098	2.81476	0.000405085	0.983942	0.989044
L2-7_02496	L2-7_02496	-0.00378516	4.72812	0.000324471	0.985628	0.989044
L2-7_03005	L2-7_03005	-0.00322989	5.56299	0.000395221	0.984139	0.989044
L2-7_00674	L2-7_00674	-0.00307387	6.00187	0.000569685	0.980958	0.986591
L2-7_02568	L2-7_02568	-0.00103378	8.92115	3.8e-05	0.99508	0.99579
L2-7_01571	L2-7_01571	-0.00100691	3.85375	1.84e-05	0.996578	0.996934
L2-7_02490	L2-7_02490	0.00129536	5.27451	5.61e-05	0.994022	0.995087
L2-7_00432	L2-7_00432	0.00129741	0.0160529	7.93e-06	0.997753	0.997753
L2-7_02250	lrp	0.00216223	5.14377	0.000303715	0.986096	0.989044
L2-7_00867	soj_1	0.00221895	2.28301	6.4e-05	0.993617	0.995037
L2-7_02205	L2-7_02205	0.0029757	1.37693	9.2e-05	0.992349	0.994122
L2-7_01095	L2-7_01095	0.00317236	5.34494	0.000345336	0.985174	0.989044
L2-7_02289	L2-7_02289	0.00342968	4.1132	0.000216556	0.988259	0.990734
L2-7_02977	siaT_2	0.00363423	5.80477	0.000298285	0.98622	0.989044
L2-7_03055	uvrB_2	0.0037689	1.79013	0.000321001	0.985705	0.989044
L2-7_02184	plsC	0.00445857	7.75256	0.0011466	0.972988	0.981394
L2-7_01280	rplD	0.00513828	10.1178	0.000306363	0.986035	0.989044
L2-7_02601	L2-7_02601	0.00534194	6.13507	0.000670792	0.979337	0.985315
L2-7_01743	L2-7_01743	0.00570892	5.0387	0.00186724	0.965533	0.974576
L2-7_01411	hisJ	0.00602413	5.14126	0.00108869	0.973678	0.981737
L2-7_00746	L2-7_00746	0.00636487	3.57058	0.00096127	0.975266	0.981924
L2-7_00037	minC	0.00646734	7.57907	0.00255234	0.959707	0.970794
L2-7_02534	upp	0.00798756	7.67228	0.00215773	0.96295	0.973372
L2-7_01147	ppnK	0.00844735	7.37515	0.00373644	0.951259	0.965384
L2-7_02491	L2-7_02491	0.0085685	6.38315	0.00319348	0.954935	0.967363
L2-7_01578	L2-7_01578	0.00935702	2.10098	0.00199147	0.964405	0.974299
L2-7_01949	yheS_1	0.0100645	5.68059	0.00286305	0.957328	0.969087
L2-7_02183	malQ_3	0.0100831	8.5703	0.00454272	0.946264	0.962937
L2-7_01960	srrA_3	0.0108806	4.99133	0.00651588	0.935664	0.955084
L2-7_02475	L2-7_02475	0.0118576	2.47695	0.0019353	0.964911	0.974299
L2-7_00438	pchR	0.012206	6.56117	0.00780802	0.929588	0.950623
L2-7_00114	L2-7_00114	0.0128879	6.3738	0.00402127	0.949437	0.964274
L2-7_00964	fldC	0.0140244	5.70958	0.0110835	0.916155	0.939629
L2-7_00319	L2-7_00319	0.0142099	4.86107	0.0094666	0.922491	0.944744
L2-7_00728	L2-7_00728	0.0144526	7.65422	0.000982229	0.974998	0.981924
L2-7_02978	siaP_2	0.0150174	6.44434	0.00393845	0.94996	0.964416
L2-7_01700	tig_2	0.0155512	10.7124	0.00401504	0.949476	0.964274
L2-7_01000	hom_1	0.0174744	6.80315	0.00362472	0.951992	0.965779
L2-7_03025	L2-7_03025	0.0181171	0.338616	0.00228996	0.961833	0.972593
L2-7_02725	L2-7_02725	0.0198727	2.46188	0.00760767	0.930495	0.951203
L2-7_03012	L2-7_03012	0.0200852	4.44487	0.0112529	0.915519	0.939321
L2-7_00414	tenI	0.0202254	3.33704	0.0133943	0.907864	0.934546
L2-7_03057	L2-7_03057	0.0209538	3.45802	0.0122275	0.911951	0.937284
L2-7_00168	pdaC	0.0211212	8.63848	0.0165405	0.897666	0.928376
L2-7_01557	L2-7_01557	0.0223809	7.0207	0.0224955	0.880776	0.916426
L2-7_02912	L2-7_02912	0.0225385	6.78631	0.00962411	0.921851	0.944434
L2-7_00386	comM	0.0226083	3.72018	0.00490285	0.944177	0.961332
L2-7_02703	L2-7_02703	0.0226727	3.64574	0.00980841	0.921109	0.944018
L2-7_01745	lipR	0.0228239	5.70654	0.0259787	0.871952	0.909632
L2-7_00516	L2-7_00516	0.0230616	5.58213	0.0172022	0.895651	0.926741
L2-7_01586	L2-7_01586	0.0235929	5.33858	0.0182462	0.89255	0.924627
L2-7_00264	L2-7_00264	0.023825	7.14943	0.0360486	0.849415	0.893655
L2-7_01007	purH	0.0245666	8.46329	0.0249763	0.874426	0.911494
L2-7_00996	rpmI	0.0253359	7.31974	0.00590113	0.938768	0.956875
L2-7_02749	L2-7_02749	0.0257231	7.62676	0.0326952	0.85651	0.897846
L2-7_00340	yrbG_1	0.0258611	6.52371	0.0356308	0.85028	0.893655
L2-7_00246	argH1	0.0258678	8.10085	0.0288132	0.865211	0.904935
L2-7_02600	L2-7_02600	0.0269916	5.94701	0.017596	0.89447	0.925861
L2-7_02029	L2-7_02029	0.0273384	7.36067	0.0363204	0.848855	0.893498
L2-7_00162	L2-7_00162	0.0279673	7.07338	0.0495945	0.82377	0.872698
L2-7_02188	sinR	0.0291392	2.06314	0.0150811	0.902261	0.931517
L2-7_01381	rpsU	0.0293091	10.2179	0.0137419	0.906681	0.934127
L2-7_00040	mreC	0.0294775	8.51051	0.0303753	0.861641	0.901875
L2-7_00863	L2-7_00863	0.0294778	9.00541	0.0248564	0.874725	0.911494
L2-7_01939	L2-7_01939	0.0299187	9.71428	0.0356559	0.850228	0.893655
L2-7_02444	rluD_2	0.0301559	3.35049	0.019771	0.888178	0.922073
L2-7_01232	L2-7_01232	0.0312968	-0.0555139	0.00589959	0.938776	0.956875
L2-7_00982	cmk	0.0319853	11.1869	0.019486	0.888982	0.922566
L2-7_01841	L2-7_01841	0.0323425	2.08877	0.0248525	0.874735	0.911494
L2-7_00443	L2-7_00443	0.0330103	4.56023	0.0236091	0.877884	0.914095
L2-7_02387	metA	0.033645	8.36225	0.049222	0.824423	0.872698
L2-7_01246	L2-7_01246	0.033827	6.37303	0.0594345	0.807392	0.859541
L2-7_02285	rnpA	0.0346508	8.239	0.0477177	0.827083	0.874854
L2-7_01420	L2-7_01420	0.0352357	2.21985	0.0182227	0.892619	0.924627
L2-7_00191	mrnC	0.0360903	7.08143	0.0588645	0.8083	0.860181
L2-7_00697	L2-7_00697	0.0361455	6.59185	0.0443957	0.833119	0.878916
L2-7_02167	ldh_1	0.0367851	6.32619	0.0656689	0.797751	0.85057
L2-7_02305	csoR_2	0.0375733	1.00173	0.0146682	0.903602	0.932557
L2-7_01052	thyA1	0.0395162	5.50591	0.0522736	0.819153	0.870031
L2-7_02098	L2-7_02098	0.0395899	2.26038	0.0343523	0.852959	0.895809
L2-7_00961	adhE_1	0.0407351	7.82311	0.0578723	0.809891	0.861547
L2-7_01626	moaA	0.0438711	6.02487	0.0970781	0.755365	0.813425
L2-7_00189	L2-7_00189	0.0441173	7.19256	0.144247	0.704095	0.771013
L2-7_01361	L2-7_01361	0.0452262	0.469074	0.0164667	0.897894	0.928376
L2-7_01587	L2-7_01587	0.0457634	3.54432	0.0466899	0.828927	0.875812
L2-7_01737	L2-7_01737	0.0464507	5.48077	0.0699678	0.791384	0.844424
L2-7_02042	L2-7_02042	0.0477941	4.68477	0.0944704	0.758569	0.815935
L2-7_01040	xpt	0.0492284	5.38201	0.0533721	0.817296	0.868765
L2-7_00700	ybbH_1	0.0496506	2.3851	0.0421395	0.837354	0.882387
L2-7_02502	L2-7_02502	0.0515493	3.74244	0.101064	0.750556	0.810115
L2-7_02275	parB_1	0.0524192	5.86485	0.0721084	0.788291	0.842086
L2-7_02218	L2-7_02218	0.0531452	5.48119	0.0822133	0.77432	0.829058
L2-7_01959	phoR_3	0.0535724	6.71977	0.215697	0.642338	0.717923
L2-7_00493	L2-7_00493	0.0539217	8.59006	0.0991449	0.752858	0.811768
L2-7_02748	putP_2	0.054941	8.98797	0.092478	0.76105	0.817662
L2-7_02611	L2-7_02611	0.057136	4.5	0.109797	0.740376	0.801907
L2-7_02835	gabR	0.0573385	5.01289	0.0904596	0.763594	0.819766
L2-7_01353	macB_2	0.0578013	8.25525	0.15985	0.689295	0.758603
L2-7_00767	rpsF	0.0586652	9.42818	0.0438663	0.834103	0.879622
L2-7_02750	L2-7_02750	0.0594834	6.92235	0.275198	0.599866	0.681323
L2-7_01330	rhaR	0.0599162	6.10991	0.162119	0.687213	0.757205
L2-7_02254	L2-7_02254	0.0600726	6.02654	0.133561	0.714768	0.780811
L2-7_02298	xerC_1	0.0612983	5.59872	0.21012	0.646673	0.721616
L2-7_02047	L2-7_02047	0.0621263	5.27201	0.109383	0.740848	0.802108
L2-7_00156	mtaB	0.0622217	6.04318	0.105181	0.745699	0.806114
L2-7_01502	dmdA_1	0.0624928	7.81594	0.0882482	0.766416	0.821851
L2-7_01527	L2-7_01527	0.0634437	2.85603	0.0503575	0.822442	0.87258
L2-7_01800	L2-7_01800	0.0639062	5.65285	0.0652994	0.798308	0.85084
L2-7_01971	dnaJ_2	0.0643445	5.75086	0.0490125	0.824791	0.872758
L2-7_00199	L2-7_00199	0.06466	4.12912	0.18735	0.665132	0.736967
L2-7_02252	vanW	0.065148	7.74357	0.221675	0.637766	0.715094
L2-7_02731	thrS	0.0651574	9.38926	0.115239	0.734256	0.797127
L2-7_00848	L2-7_00848	0.0669266	6.20586	0.170385	0.679769	0.750183
L2-7_00933	rluC_1	0.0672571	7.93374	0.146291	0.702105	0.769438
L2-7_02858	L2-7_02858	0.0683755	5.32064	0.235607	0.627397	0.705444
L2-7_02580	L2-7_02580	0.0686965	6.69599	0.232644	0.62957	0.707037
L2-7_00210	licR_1	0.0714594	6.28697	0.319041	0.572185	0.657883
L2-7_00902	L2-7_00902	0.0727569	0.0651795	0.0341969	0.853289	0.895809
L2-7_01389	hisB	0.0738422	5.42108	0.0981989	0.754002	0.81227
L2-7_00198	L2-7_00198	0.0745515	3.48887	0.216278	0.64189	0.717708
L2-7_02276	soj_4	0.0756337	5.4537	0.122159	0.726704	0.791097
L2-7_01025	degA_1	0.0762933	3.66999	0.155683	0.693163	0.761574
L2-7_03001	L2-7_03001	0.076751	3.28221	0.172164	0.678196	0.749036
L2-7_02706	xerC_2	0.0767886	2.12843	0.094912	0.758023	0.815661
L2-7_01726	phoR_2	0.0778073	5.53017	0.288144	0.591412	0.674181
L2-7_01067	smpB	0.0780402	5.02197	0.190918	0.662154	0.735085
L2-7_01426	L2-7_01426	0.0782654	7.16277	0.352507	0.552698	0.642064
L2-7_01373	ybeY	0.0784774	5.22557	0.191852	0.66138	0.734517
L2-7_02934	L2-7_02934	0.0798327	6.11868	0.408053	0.522959	0.614653
L2-7_02663	L2-7_02663	0.0803288	7.53006	0.292378	0.588701	0.671637
L2-7_01225	recR	0.0835865	7.79183	0.298218	0.585002	0.669051
L2-7_01048	L2-7_01048	0.0849074	8.02185	0.307963	0.578933	0.664007
L2-7_02376	skfE	0.0850814	5.66162	0.0868494	0.768221	0.823472
L2-7_02052	sufB	0.0856582	8.22679	0.134352	0.713962	0.780234
L2-7_01325	L2-7_01325	0.087286	5.53777	0.176834	0.674108	0.745698
L2-7_01564	L2-7_01564	0.0878591	4.34897	0.0827147	0.773652	0.828659
L2-7_01425	rsrIM	0.0903662	7.67807	0.477328	0.489635	0.58282
L2-7_02053	ecfA2	0.091162	7.8602	0.131817	0.716556	0.781869
L2-7_00188	ispF	0.0929561	5.82523	0.582127	0.44548	0.541533
L2-7_01989	L2-7_01989	0.0935621	4.96918	0.216344	0.64184	0.717708
L2-7_01570	L2-7_01570	0.0948363	4.2519	0.369562	0.543243	0.633445
L2-7_00153	iscS	0.0963375	6.67056	0.279264	0.597184	0.679379
L2-7_02206	L2-7_02206	0.0964222	0.864066	0.0967562	0.755758	0.813535
L2-7_01424	L2-7_01424	0.0976151	2.34088	0.0753724	0.783669	0.837749
L2-7_01716	barA_1	0.0981478	6.22443	0.34497	0.556975	0.645591
L2-7_00552	creC	0.0990336	7.41119	0.0702458	0.790979	0.844314
L2-7_01990	L2-7_01990	0.0990937	4.88172	0.365341	0.545555	0.635083
L2-7_00744	L2-7_00744	0.100973	3.29033	0.144193	0.704148	0.771013
L2-7_00190	cysS	0.103379	7.99923	0.330238	0.565519	0.653149
L2-7_00696	L2-7_00696	0.104478	6.15359	0.417891	0.517991	0.610093
L2-7_01391	hisG	0.104485	5.63786	0.251313	0.616152	0.695031
L2-7_00309	L2-7_00309	0.105641	4.93085	0.594519	0.440677	0.536859
L2-7_01588	rnz	0.106782	6.12276	0.256659	0.612425	0.692075
L2-7_01247	L2-7_01247	0.107203	5.26223	0.60955	0.434957	0.532205
L2-7_01256	L2-7_01256	0.108202	3.83305	0.33253	0.564173	0.651882
L2-7_01410	rpfC_1	0.108734	6.72933	0.527977	0.467459	0.563363
L2-7_00310	queC_1	0.108737	5.78265	0.370924	0.542501	0.632842
L2-7_01858	L2-7_01858	0.108967	5.17552	0.152937	0.695744	0.763602
L2-7_01224	L2-7_01224	0.109933	6.06992	0.656872	0.417667	0.514871
L2-7_02928	L2-7_02928	0.109995	3.97511	0.384413	0.535251	0.625426
L2-7_02997	L2-7_02997	0.112393	2.64199	0.214111	0.643564	0.718811
L2-7_01108	L2-7_01108	0.112842	6.15929	0.46847	0.493692	0.58715
L2-7_02284	yidD	0.113389	6.25082	0.524214	0.46905	0.564552
L2-7_01701	clpP	0.113419	9.7297	0.262323	0.608529	0.689041
L2-7_01698	gph_2	0.114063	6.62841	0.5191	0.471226	0.565949
L2-7_01051	dfrA	0.11525	4.67208	0.358473	0.549355	0.638976
L2-7_00177	L2-7_00177	0.115792	4.75485	0.700285	0.402688	0.500147
L2-7_01416	L2-7_01416	0.116215	3.78167	0.232764	0.629482	0.707037
L2-7_00511	prs	0.117818	9.19412	0.553734	0.456796	0.553608
L2-7_02207	cwlS_1	0.117851	2.64214	0.200433	0.654372	0.729046
L2-7_02078	nadE	0.117857	6.84624	0.76663	0.381262	0.479701
L2-7_02182	nrnA_2	0.118475	9.13927	0.46045	0.497414	0.590574
L2-7_01226	pfkA_2	0.119833	8.99699	0.485725	0.485841	0.579534
L2-7_01593	L2-7_01593	0.120799	3.14521	0.442567	0.505886	0.599616
L2-7_00794	L2-7_00794	0.121365	7.6943	0.410236	0.52185	0.613897
L2-7_02349	L2-7_02349	0.121385	0.863579	0.117467	0.731798	0.795692
L2-7_02244	L2-7_02244	0.121494	3.85875	0.299931	0.583926	0.668346
L2-7_00630	spmA	0.122237	5.0653	0.88945	0.345626	0.442212
L2-7_00777	L2-7_00777	0.122311	4.45599	0.544596	0.460534	0.556454
L2-7_00988	L2-7_00988	0.122695	6.75384	0.243228	0.621884	0.699526
L2-7_01200	L2-7_01200	0.12446	4.63572	0.11965	0.729415	0.793717
L2-7_00795	cbiT	0.124513	7.52651	0.497728	0.4805	0.574141
L2-7_00463	degU_1	0.124582	2.67656	0.165403	0.68423	0.754214
L2-7_02297	yneA	0.12495	2.33222	0.203919	0.651576	0.726509
L2-7_02850	L2-7_02850	0.125014	7.45118	0.498682	0.48008	0.573884
L2-7_00105	L2-7_00105	0.125479	8.27867	0.527101	0.467828	0.563566
L2-7_02337	L2-7_02337	0.125654	5.34513	0.871021	0.350673	0.447239
L2-7_00581	rpiB	0.126346	5.91526	0.687405	0.407048	0.504222
L2-7_02375	ytrA_2	0.127827	3.96636	0.107573	0.742924	0.803757
L2-7_00747	L2-7_00747	0.128182	4.82627	0.720065	0.396123	0.495065
L2-7_02653	L2-7_02653	0.128279	0.794884	0.173336	0.677164	0.748267
L2-7_01374	ybeZ	0.128963	7.08457	0.83276	0.361476	0.459345
L2-7_00263	L2-7_00263	0.129081	6.72876	0.841172	0.359062	0.456691
L2-7_00489	mazG	0.129301	6.35034	0.736698	0.390721	0.489186
L2-7_01279	rplW	0.129709	9.7596	0.18009	0.671296	0.74288
L2-7_00442	L2-7_00442	0.130403	4.21662	0.421631	0.516124	0.608156
L2-7_00050	L2-7_00050	0.131182	7.30072	0.270732	0.602841	0.683871
L2-7_01148	tlyA	0.133959	6.92866	1.13374	0.286979	0.38346
L2-7_00458	albA	0.134129	2.84254	0.292885	0.588377	0.671541
L2-7_02986	L2-7_02986	0.134636	13.0939	0.284375	0.593848	0.676309
L2-7_02540	L2-7_02540	0.135281	3.79111	0.711116	0.399074	0.497865
L2-7_01235	L2-7_01235	0.135422	1.37037	0.325931	0.568065	0.654309
L2-7_00387	L2-7_00387	0.135797	2.53144	0.13309	0.71525	0.781032
L2-7_02237	L2-7_02237	0.136475	6.2477	0.277725	0.598196	0.679952
L2-7_02219	L2-7_02219	0.137909	3.59058	0.114457	0.735126	0.797762
L2-7_02110	L2-7_02110	0.138088	3.68449	0.256864	0.612283	0.692075
L2-7_01021	ddpA	0.138362	3.43517	0.16017	0.689	0.758576
L2-7_01261	L2-7_01261	0.140449	12.1871	0.272535	0.601637	0.682781
L2-7_02798	phoR_5	0.140454	5.5424	0.921295	0.337135	0.432704
L2-7_01501	hacB	0.141316	6.99983	0.543359	0.461044	0.55683
L2-7_01486	sdhB	0.141863	4.88151	1.18197	0.276956	0.37381
L2-7_00307	aplIR	0.143232	6.44504	1.22077	0.269209	0.366355
L2-7_02302	L2-7_02302	0.143247	6.85111	0.504987	0.477317	0.57172
L2-7_01589	tsaD	0.144818	6.50135	0.588001	0.443193	0.539456
L2-7_00711	L2-7_00711	0.14553	-0.16013	0.0463085	0.829616	0.87621
L2-7_01237	L2-7_01237	0.146623	2.06885	0.344371	0.557317	0.645591
L2-7_02278	L2-7_02278	0.147793	5.67813	1.00995	0.314915	0.411756
L2-7_02562	L2-7_02562	0.148761	4.06056	0.583974	0.444759	0.540892
L2-7_00192	L2-7_00192	0.148823	8.12423	0.881626	0.347757	0.444329
L2-7_01846	L2-7_01846	0.150102	1.73777	0.319902	0.571667	0.657557
L2-7_02692	relA_2	0.150378	9.35632	0.616905	0.4322	0.529294
L2-7_01958	L2-7_01958	0.150768	5.17496	0.942634	0.331601	0.427784
L2-7_00806	fabH	0.151562	8.60751	0.0325203	0.856891	0.897908
L2-7_00260	L2-7_00260	0.152518	5.41518	1.12946	0.28789	0.384494
L2-7_02561	L2-7_02561	0.152789	8.66004	0.929639	0.334957	0.430922
L2-7_02722	barA_2	0.152814	6.56756	0.806552	0.369141	0.466968
L2-7_02504	pduV_4	0.152919	6.91075	0.737005	0.390622	0.489186
L2-7_02715	rpmE	0.15422	8.57997	0.522928	0.469595	0.564966
L2-7_02395	lgt	0.154685	5.69903	1.08527	0.297521	0.392712
L2-7_02586	L2-7_02586	0.154688	3.76886	0.688834	0.406561	0.503952
L2-7_00351	L2-7_00351	0.154972	5.95456	0.964465	0.326065	0.422196
L2-7_01515	glnA_2	0.156246	8.8412	0.299579	0.584147	0.668346
L2-7_00626	alr	0.157354	5.67695	1.00641	0.315765	0.412482
L2-7_02176	dapA	0.157415	8.56822	0.617029	0.432154	0.529294
L2-7_01041	mobA_2	0.160656	6.75875	1.17056	0.279286	0.375869
L2-7_02488	disA	0.161427	6.22511	1.96907	0.160547	0.238648
L2-7_02175	btuR	0.162519	7.25071	0.758015	0.383951	0.482002
L2-7_02465	hgdC_2	0.163575	5.74138	1.40377	0.236093	0.327649
L2-7_02028	cobB_2	0.16378	5.54349	0.92195	0.336963	0.432704
L2-7_02546	truA_2	0.163936	5.72899	1.78219	0.181881	0.264057
L2-7_03015	baeS	0.164881	1.96083	0.508494	0.475791	0.570611
L2-7_01871	ribF	0.166984	7.99745	0.970657	0.324516	0.42058
L2-7_01531	L2-7_01531	0.167656	5.59805	0.954229	0.328645	0.425145
L2-7_01530	L2-7_01530	0.168587	6.32663	0.843466	0.358407	0.456273
L2-7_01618	rpmA	0.169097	10.8178	0.535181	0.464437	0.560203
L2-7_00537	L2-7_00537	0.169299	10.4251	1.10305	0.293597	0.389516
L2-7_01725	saeR	0.16952	5.06746	1.68974	0.193635	0.27812
L2-7_01485	sdhA	0.169824	7.22268	1.66014	0.197585	0.28261
L2-7_01033	thiD_1	0.17035	2.32739	0.653364	0.418913	0.51618
L2-7_00641	L2-7_00641	0.170583	5.6389	1.16063	0.281336	0.377721
L2-7_01613	rsfS	0.17269	5.03472	1.09161	0.296114	0.391465
L2-7_00212	sleB	0.172896	0.0707686	0.103089	0.748154	0.808145
L2-7_02174	hisS	0.173003	6.48572	1.01486	0.313741	0.410411
L2-7_00538	ribH	0.173266	10.9035	0.935352	0.333476	0.429807
L2-7_00128	L2-7_00128	0.173815	1.89689	0.536146	0.464034	0.559959
L2-7_01851	L2-7_01851	0.174799	2.02045	0.325801	0.568142	0.654309
L2-7_00591	cysD_1	0.174805	7.34104	0.848071	0.357099	0.454814
L2-7_01392	hisZ	0.174952	6.09764	0.735737	0.39103	0.489355
L2-7_02439	L2-7_02439	0.175237	6.48345	0.927318	0.335561	0.431501
L2-7_01388	L2-7_01388	0.17558	5.00105	0.598518	0.439144	0.535458
L2-7_01221	cca	0.175741	8.30399	1.39719	0.237195	0.328858
L2-7_02602	L2-7_02602	0.176898	1.66775	0.550492	0.458117	0.554011
L2-7_01796	L2-7_01796	0.178233	3.22891	0.321544	0.570681	0.656694
L2-7_02054	tetO_2	0.178242	8.62155	0.813632	0.367049	0.46495
L2-7_01897	rplJ	0.179708	11.7036	0.605807	0.436371	0.533702
L2-7_01484	iscR_2	0.179741	6.36718	1.67072	0.196163	0.28112
L2-7_02882	ywiE_2	0.180596	5.12963	1.2948	0.255165	0.350305
L2-7_01238	L2-7_01238	0.180997	0.386447	0.218852	0.639916	0.716072
L2-7_00036	minD	0.181067	7.11239	2.06337	0.150876	0.22559
L2-7_02883	ywaC_3	0.181813	3.35036	0.830877	0.362019	0.459618
L2-7_00798	cobK	0.182207	6.41424	1.19086	0.275157	0.372099
L2-7_01265	rplR	0.182582	10.1363	0.336369	0.561932	0.650116
L2-7_00456	L2-7_00456	0.183349	6.15119	0.865397	0.352233	0.448821
L2-7_00515	L2-7_00515	0.183507	7.27916	1.42051	0.23332	0.324447
L2-7_01390	hisD	0.184493	6.37111	0.603221	0.437352	0.534435
L2-7_02717	bioY2	0.185911	5.74656	0.384748	0.535073	0.625426
L2-7_02991	L2-7_02991	0.186252	0.908423	0.42939	0.512288	0.604647
L2-7_01951	L2-7_01951	0.186745	4.80819	1.11148	0.291762	0.388463
L2-7_01639	zupT_2	0.187076	7.84875	1.13544	0.286618	0.383342
L2-7_01096	apeB	0.187251	6.46299	1.86932	0.171553	0.251711
L2-7_00536	mecB	0.187418	7.32704	1.27392	0.259033	0.354572
L2-7_02075	L2-7_02075	0.188755	5.24288	0.256378	0.612619	0.692075
L2-7_01274	rplP	0.189622	9.77587	0.328839	0.566343	0.653149
L2-7_01637	L2-7_01637	0.189683	6.79581	1.10654	0.292836	0.389188
L2-7_01427	L2-7_01427	0.190785	6.16928	1.63301	0.201288	0.28732
L2-7_02551	bssA	0.190838	3.21082	0.932364	0.334249	0.430407
L2-7_00157	L2-7_00157	0.191578	5.56318	1.21724	0.269904	0.366943
L2-7_01088	L2-7_01088	0.192285	8.20902	1.30958	0.252471	0.347458
L2-7_02879	L2-7_02879	0.192294	1.88486	0.456315	0.499351	0.592623
L2-7_02178	cfiB_2	0.192793	3.32916	0.920201	0.337422	0.432704
L2-7_01673	L2-7_01673	0.193131	5.62419	1.32343	0.249978	0.344365
L2-7_01824	L2-7_01824	0.193528	6.36442	2.8932	0.088954	0.143388
L2-7_00727	L2-7_00727	0.194064	11.4292	0.0803299	0.776851	0.83145
L2-7_00732	L2-7_00732	0.194164	6.72023	1.21212	0.270912	0.367779
L2-7_01266	rplF	0.194959	10.867	0.398689	0.527767	0.618746
L2-7_00437	cmoA	0.194998	2.46007	0.31288	0.575918	0.661091
L2-7_00666	L2-7_00666	0.197777	6.97268	2.13336	0.144124	0.217116
L2-7_02708	L2-7_02708	0.197818	2.56079	0.810118	0.368085	0.466022
L2-7_02833	L2-7_02833	0.198735	2.73892	0.690284	0.406068	0.503898
L2-7_02423	L2-7_02423	0.198789	0.907107	0.400502	0.52683	0.618165
L2-7_02797	walR	0.199251	4.85285	1.2268	0.26803	0.365105
L2-7_00424	dpiB	0.199417	5.15671	1.23236	0.266948	0.363985
L2-7_00847	kdpE	0.199721	6.15891	1.10507	0.293155	0.389188
L2-7_00603	L2-7_00603	0.200273	5.90799	0.702774	0.401853	0.499332
L2-7_01516	carB	0.20133	9.43111	0.476307	0.4901	0.583125
L2-7_00339	pduV_1	0.201756	5.36851	1.91012	0.16695	0.246208
L2-7_01676	glnH_1	0.2021	8.52614	0.688572	0.40665	0.503952
L2-7_00243	mepA_2	0.202651	4.09877	1.41266	0.234615	0.325926
L2-7_02017	lytC_2	0.203156	8.56133	1.50372	0.220101	0.309689
L2-7_02245	nfo	0.203556	2.98393	1.0299	0.310183	0.406517
L2-7_01278	rplB	0.203647	11.2292	0.42558	0.514166	0.606352
L2-7_00201	L2-7_00201	0.203742	5.84707	2.33323	0.126639	0.194221
L2-7_02690	hemZ	0.203823	8.69596	1.23567	0.266306	0.363464
L2-7_01674	artM	0.204195	8.74864	0.982664	0.321542	0.418448
L2-7_01380	L2-7_01380	0.20421	6.63863	1.74942	0.18595	0.268435
L2-7_01857	L2-7_01857	0.204596	9.12617	0.447206	0.503665	0.597236
L2-7_01988	adk	0.205526	8.39307	0.805519	0.369448	0.467145
L2-7_01229	gluP	0.206342	3.95562	1.82894	0.176253	0.257353
L2-7_02808	L2-7_02808	0.206357	6.69779	3.13912	0.076435	0.126504
L2-7_01585	tsaB	0.207209	6.88021	1.16888	0.279632	0.375974
L2-7_03021	L2-7_03021	0.207372	2.26115	0.34432	0.557346	0.645591
L2-7_01638	L2-7_01638	0.207421	7.67639	1.67493	0.195599	0.280629
L2-7_01508	cadA	0.207622	7.28007	1.6102	0.204463	0.291555
L2-7_02582	L2-7_02582	0.20977	5.01357	1.47283	0.224899	0.315716
L2-7_02000	ecfT_3	0.210408	3.43086	0.780335	0.377039	0.474815
L2-7_00176	ktrA_1	0.210866	5.02588	2.11323	0.146031	0.219634
L2-7_00046	mutS	0.211192	6.56343	1.08515	0.297547	0.392712
L2-7_02377	L2-7_02377	0.211822	6.89885	1.17853	0.277655	0.374034
L2-7_02487	L2-7_02487	0.212094	5.3077	2.35784	0.124655	0.191913
L2-7_02902	L2-7_02902	0.212765	7.68167	2.36862	0.123796	0.190802
L2-7_00234	acrB_1	0.215124	0.438534	0.336341	0.561949	0.650116
L2-7_01150	L2-7_01150	0.216453	6.91395	2.72165	0.0989956	0.157427
L2-7_00459	drrA_1	0.216521	1.61482	0.432557	0.510737	0.603579
L2-7_00582	L2-7_00582	0.218183	5.83608	1.49893	0.220837	0.310479
L2-7_01263	rpmD	0.219626	9.75101	0.508206	0.475916	0.570611
L2-7_01568	sigW_1	0.219816	3.02066	0.783212	0.376161	0.473922
L2-7_01264	rpsE	0.220121	10.7148	0.50345	0.477988	0.572116
L2-7_00687	alsT_1	0.221753	7.67163	0.427591	0.513173	0.605437
L2-7_01324	L2-7_01324	0.222056	5.25774	1.2086	0.271609	0.368546
L2-7_02552	mrcA	0.222483	10.0579	1.46849	0.225584	0.316519
L2-7_01262	rplO	0.222856	10.7872	0.550851	0.45797	0.554011
L2-7_02541	L2-7_02541	0.223121	4.45507	1.769	0.183506	0.265728
L2-7_02362	ywqN_3	0.223488	4.62912	1.55566	0.212302	0.30044
L2-7_02270	L2-7_02270	0.223944	3.38056	1.46579	0.226011	0.316641
L2-7_02286	rpmH	0.224015	7.88075	0.828695	0.36265	0.460003
L2-7_01448	L2-7_01448	0.224142	-0.0655857	0.148097	0.70036	0.768067
L2-7_02998	L2-7_02998	0.224654	2.70602	1.13793	0.28609	0.382819
L2-7_00695	rlmL	0.224897	7.35724	2.60557	0.106489	0.167819
L2-7_02461	tuf	0.225333	13.9456	0.717615	0.396927	0.495413
L2-7_00039	L2-7_00039	0.225421	5.56464	1.85962	0.172668	0.252778
L2-7_01533	L2-7_01533	0.225921	2.87019	0.395581	0.52938	0.620118
L2-7_01306	rlmK	0.226837	7.10013	2.63292	0.104669	0.165323
L2-7_01199	L2-7_01199	0.226888	4.69124	0.386412	0.534192	0.62471
L2-7_01996	rpsD	0.227269	10.8089	0.944482	0.331128	0.42737
L2-7_01995	rpsK	0.227561	10.1548	1.18313	0.276719	0.37381
L2-7_01252	mepA_8	0.227645	5.87465	1.46623	0.225942	0.316641
L2-7_02292	gyrA_2	0.228383	10.0322	2.0313	0.154089	0.229658
L2-7_01994	rpsM	0.230402	10.5674	1.24706	0.264114	0.360822
L2-7_01152	xseA	0.231477	7.98946	2.74353	0.0976488	0.155993
L2-7_02942	rsmD	0.231982	4.70788	2.29689	0.129633	0.197873
L2-7_00745	L2-7_00745	0.232097	6.15873	2.58198	0.108087	0.169954
L2-7_00673	L2-7_00673	0.232788	4.52173	2.55305	0.110081	0.172606
L2-7_01950	moaC	0.233151	3.41122	1.29664	0.254828	0.350013
L2-7_02378	L2-7_02378	0.233495	6.05152	1.97071	0.160372	0.238515
L2-7_00038	pbpA_1	0.233712	8.92192	2.41964	0.119822	0.185391
L2-7_01329	glmU_1	0.233961	6.69793	3.08923	0.0788122	0.129293
L2-7_01275	rpsC	0.23546	10.4279	0.461972	0.496704	0.58998
L2-7_02904	L2-7_02904	0.236926	2.01177	0.791316	0.373702	0.471249
L2-7_01862	L2-7_01862	0.236996	5.96389	3.0481	0.0808317	0.132064
L2-7_02704	xerD_2	0.237043	6.56677	1.16932	0.27954	0.375974
L2-7_02793	L2-7_02793	0.237506	1.96728	0.482305	0.48738	0.580876
L2-7_00047	miaB	0.237909	6.06592	1.76027	0.18459	0.266884
L2-7_01019	oppF	0.237918	3.32932	1.13899	0.285866	0.382702
L2-7_01044	kdhA	0.238103	6.84717	2.45247	0.11734	0.182355
L2-7_00436	L2-7_00436	0.239052	1.71575	1.09329	0.295742	0.391251
L2-7_00494	L2-7_00494	0.240104	4.5537	0.929684	0.334945	0.430922
L2-7_00144	cbh_1	0.240277	5.4031	3.13183	0.0767775	0.126921
L2-7_02283	misCB	0.241377	9.58508	1.3847	0.239302	0.331287
L2-7_00175	ktrB_1	0.242312	6.02777	2.72837	0.0985796	0.157032
L2-7_00130	yraA	0.244059	0.56352	0.688998	0.406506	0.503952
L2-7_01277	rpsS	0.244641	9.37777	0.59872	0.439067	0.535458
L2-7_01178	tagB_4	0.244791	7.80056	2.29226	0.13002	0.198322
L2-7_00119	corC_1	0.245671	8.12134	1.73398	0.187903	0.270836
L2-7_01555	clpC	0.246818	8.31561	2.41511	0.12017	0.185635
L2-7_01168	plsX	0.247076	4.90513	1.30547	0.253216	0.348141
L2-7_02277	argS	0.247173	7.15242	3.64675	0.0561787	0.0974691
L2-7_00940	metK_2	0.247646	8.90824	1.17926	0.277506	0.374012
L2-7_01276	rplV	0.248741	9.68327	0.559932	0.454287	0.551045
L2-7_01675	yecS	0.249904	8.09759	1.18839	0.275655	0.372594
L2-7_01793	rarA	0.250425	5.33863	2.29663	0.129655	0.197873
L2-7_02989	L2-7_02989	0.251276	1.62953	0.979687	0.322276	0.418645
L2-7_01609	yccM_2	0.251305	2.95431	0.704748	0.401193	0.499271
L2-7_01269	rplE	0.254343	10.707	0.604264	0.436956	0.534184
L2-7_01852	L2-7_01852	0.254495	0.848323	0.681144	0.409193	0.506207
L2-7_02919	ppiB	0.254555	7.43554	1.78831	0.181132	0.263242
L2-7_00548	L2-7_00548	0.254878	5.82703	0.80964	0.368227	0.466022
L2-7_01218	ydfH_1	0.255401	7.26496	2.12292	0.145109	0.218365
L2-7_03070	L2-7_03070	0.255621	-0.0711698	0.0650609	0.798669	0.850901
L2-7_02343	L2-7_02343	0.256418	6.401	4.60357	0.0319054	0.059725
L2-7_01050	L2-7_01050	0.256715	4.65673	2.19445	0.138509	0.209445
L2-7_00323	L2-7_00323	0.256734	6.80696	1.02078	0.312333	0.409143
L2-7_01075	pfkA1	0.2569	7.8927	3.86101	0.0494207	0.0869283
L2-7_01545	L2-7_01545	0.257023	7.73784	0.980436	0.322091	0.418599
L2-7_02593	rmlC	0.25829	5.76046	0.795213	0.372528	0.470191
L2-7_01984	mnmE_1	0.258399	5.48205	2.65858	0.102993	0.163043
L2-7_01556	L2-7_01556	0.259294	6.98982	2.4538	0.117241	0.182302
L2-7_02957	L2-7_02957	0.261591	6.95968	1.75737	0.184953	0.26727
L2-7_02382	L2-7_02382	0.261933	6.4463	1.43004	0.231758	0.322596
L2-7_02539	L2-7_02539	0.262753	2.09703	1.39168	0.238122	0.329816
L2-7_01267	rpsH	0.262941	10.1248	0.749597	0.386604	0.484899
L2-7_00671	topB_1	0.263939	6.33942	2.52549	0.11202	0.175254
L2-7_01665	mglB_1	0.263946	5.40959	2.71451	0.0994395	0.158043
L2-7_02913	hcpC	0.266269	8.62472	2.21623	0.136566	0.207178
L2-7_01538	kynB	0.267127	4.61834	0.970736	0.324497	0.42058
L2-7_00793	cbiC	0.268107	6.49609	2.57277	0.108717	0.170754
L2-7_00194	L2-7_00194	0.268578	5.79923	4.14496	0.0417586	0.0753429
L2-7_02171	yigZ	0.269628	4.74257	3.75661	0.0525991	0.0918844
L2-7_01849	L2-7_01849	0.270425	1.26269	1.22772	0.267852	0.365039
L2-7_02373	guaA	0.270606	10.4733	2.42294	0.11957	0.185102
L2-7_01271	rplN	0.271206	10.48	0.705579	0.400915	0.499271
L2-7_00262	L2-7_00262	0.272245	6.02995	2.75787	0.0967772	0.154777
L2-7_01333	L2-7_01333	0.273435	7.27527	1.67721	0.195295	0.280337
L2-7_02240	L2-7_02240	0.273505	1.61172	1.10125	0.293992	0.389841
L2-7_00645	L2-7_00645	0.27405	6.45058	2.92003	0.0874863	0.141371
L2-7_02590	rmlA1_2	0.274069	5.24652	1.06003	0.303208	0.398307
L2-7_00786	hemL	0.276143	6.88541	2.90889	0.0880927	0.142105
L2-7_01872	truB	0.276384	8.00009	2.35927	0.124541	0.191843
L2-7_01422	L2-7_01422	0.276585	6.79726	4.01915	0.0449863	0.0803901
L2-7_01591	clpX_1	0.277859	7.02814	3.15016	0.0759195	0.125872
L2-7_02112	L2-7_02112	0.278415	5.89612	2.11001	0.146338	0.219978
L2-7_01915	licR_2	0.278544	12.0859	1.274	0.259018	0.354572
L2-7_02361	L2-7_02361	0.278943	3.2544	1.34774	0.245674	0.33912
L2-7_01733	bacD	0.279372	8.61679	2.64608	0.103806	0.164051
L2-7_00869	L2-7_00869	0.279665	2.25528	1.16765	0.279884	0.376133
L2-7_02489	L2-7_02489	0.279673	7.08039	4.953	0.0260455	0.0496797
L2-7_02242	ptsH_3	0.280089	5.84501	3.93246	0.0473625	0.0838874
L2-7_00014	pyrE	0.280689	8.66122	3.61112	0.0573943	0.0991485
L2-7_02051	csoR_1	0.281847	6.38452	1.60296	0.205484	0.292564
L2-7_00797	cbiL	0.28277	5.59715	3.15585	0.0756553	0.12551
L2-7_02655	cas1_3	0.283586	2.36228	1.88439	0.169836	0.249675
L2-7_02224	hhaIM_2	0.28576	4.80922	3.83256	0.0502663	0.0882494
L2-7_01350	yknX	0.28584	8.72388	1.59182	0.207066	0.29407
L2-7_01024	L2-7_01024	0.285903	6.93005	3.11558	0.0775467	0.127675
L2-7_01664	mro	0.286294	5.6657	3.48156	0.0620562	0.106025
L2-7_01788	L2-7_01788	0.286405	8.28476	1.26858	0.260033	0.355595
L2-7_00034	mrdB	0.288063	7.65321	3.98116	0.0460118	0.0819092
L2-7_01379	dhaK	0.288119	11.8413	1.98719	0.158635	0.236182
L2-7_02691	L2-7_02691	0.290046	7.6272	2.66159	0.102798	0.162827
L2-7_01517	carA	0.290262	7.67881	1.10538	0.293088	0.389188
L2-7_02280	mnmG	0.292138	7.70051	4.00051	0.0454866	0.0811288
L2-7_00889	L2-7_00889	0.292337	0.353063	0.333884	0.563381	0.651235
L2-7_01617	obg	0.293092	7.09818	1.93452	0.164265	0.242758
L2-7_00449	L2-7_00449	0.293189	3.30611	2.65023	0.103535	0.163785
L2-7_00627	L2-7_00627	0.293519	3.20003	2.4413	0.118178	0.183251
L2-7_00769	rpsR	0.293686	9.31455	1.07901	0.298918	0.39415
L2-7_00001	L2-7_00001	0.294471	5.4437	3.07745	0.0793848	0.130156
L2-7_01896	rplL	0.294537	10.1271	1.14086	0.28547	0.382355
L2-7_02939	ylbJ	0.295905	7.26534	6.97112	0.00828355	0.0183048
L2-7_00546	L2-7_00546	0.295915	2.4643	0.765824	0.381512	0.479801
L2-7_02309	deoR_3	0.296986	6.2855	2.09395	0.147884	0.221825
L2-7_00509	L2-7_00509	0.297301	9.03076	2.44886	0.117611	0.182675
L2-7_01868	L2-7_01868	0.297324	8.798	3.98877	0.0458044	0.0815919
L2-7_01405	dinB_4	0.298448	4.53624	3.60075	0.0577537	0.0995851
L2-7_00743	tnpR_2	0.298625	8.24239	3.82391	0.0505261	0.0886501
L2-7_00013	L2-7_00013	0.29902	5.83144	4.07352	0.0435603	0.0781909
L2-7_00015	pyrD	0.299291	7.71025	3.50394	0.061223	0.104793
L2-7_01352	L2-7_01352	0.300512	8.67637	3.32192	0.068362	0.115184
L2-7_02583	L2-7_02583	0.300706	3.52549	2.1737	0.140388	0.21183
L2-7_00108	L2-7_00108	0.300727	5.49189	1.81878	0.177458	0.258966
L2-7_02109	L2-7_02109	0.30135	2.70013	1.71511	0.190324	0.273958
L2-7_00514	L2-7_00514	0.301467	4.19639	2.94776	0.0859968	0.139205
L2-7_01488	L2-7_01488	0.301852	5.23083	3.99022	0.045765	0.0815735
L2-7_02574	L2-7_02574	0.302154	1.37371	0.926027	0.335897	0.431736
L2-7_01534	bioB_2	0.303686	6.10769	5.55998	0.0183756	0.0369358
L2-7_00342	L2-7_00342	0.303916	4.93687	3.93403	0.0473185	0.0838624
L2-7_00423	L2-7_00423	0.304087	4.62392	2.47243	0.115858	0.180353
L2-7_00675	tig_1	0.305327	6.36211	2.91146	0.0879522	0.14196
L2-7_01625	mog	0.306399	6.07508	3.37138	0.066338	0.112246
L2-7_01497	L2-7_01497	0.307419	5.38847	4.36678	0.0366462	0.0676434
L2-7_02338	L2-7_02338	0.307561	3.09574	2.47576	0.115614	0.180072
L2-7_01060	rasP	0.309088	7.37917	3.87404	0.0490384	0.0864187
L2-7_01270	rplX	0.310818	10.0378	0.987242	0.320417	0.417392
L2-7_00261	hsdR_2	0.311514	7.5041	5.45365	0.0195275	0.0388332
L2-7_00598	proC	0.314008	5.54665	4.46636	0.0345685	0.0642315
L2-7_00347	acm	0.314646	6.03035	4.81774	0.0281683	0.0533655
L2-7_02610	L2-7_02610	0.314989	6.87642	5.4173	0.0199382	0.0395377
L2-7_01895	rlmCD_2	0.315399	7.00956	1.37475	0.240997	0.333303
L2-7_00302	L2-7_00302	0.315983	6.62767	0.577586	0.44726	0.543462
[truncated: 870 more rows]

## Sheet: Table S9. DEG C.c. GD-7;F vs L
Locus ID	Gene Name	logFC	logCPM	LR	PValue	FDR
[truncated: 3,013 more rows]

[truncated: 9 more sheets: Table S10. DEG C.c.GD-7;F vs FL, Table S11. DEG C.c.GD-7;L vs FL, Table S12. LU genes HMMs, Table S13. L2-7 LU comparison, Table S14. GD-7 LU comparison, Table S15. GD-7 But comparison, Table S16. Lac perm families, Table S17. LP-IV subfamilies, Table S18. Acyl Co-A Dehyd]
